# Supplementary material
Source: publisher figshare collection journal article supplement (https://acs.figshare.com/ndownloader/files/3867244)
Supplement: Supplementary file 1 [file 3867244]

data_n2833
_audit_creation_date              2013-06-14
_audit_creation_method
;
  Olex2 1.2
  (compiled Apr 23 2013 17:59:47, GUI svn.r4466)
;
_publ_contact_author_address      ?
_publ_contact_author_email        ?
_publ_contact_author_name         ''
_publ_contact_author_phone        ?
_chemical_name_common             ?
_chemical_name_systematic
;
 ?
;
_chemical_formula_moiety          '3(C2 H4 Br2), C60 H42 N6 O12'
_chemical_formula_sum             'C66 H54 Br6 N6 O12'
_chemical_formula_weight          1602.61
_chemical_absolute_configuration  rm
_chemical_melting_point           ?
loop_
  _atom_type_symbol
  _atom_type_description
  _atom_type_scat_dispersion_real
  _atom_type_scat_dispersion_imag
  _atom_type_scat_source
 'C' 'C' 0.0181 0.0091 'International Tables Vol C Tables 4.2.6.8 and 6.1.1.4'
 'H' 'H' 0.0000 0.0000 'International Tables Vol C Tables 4.2.6.8 and 6.1.1.4'
 'Br' 'Br' -0.6763 1.2805
 'International Tables Vol C Tables 4.2.6.8 and 6.1.1.4'
 'N' 'N' 0.0311 0.0180 'International Tables Vol C Tables 4.2.6.8 and 6.1.1.4'
 'O' 'O' 0.0492 0.0322 'International Tables Vol C Tables 4.2.6.8 and 6.1.1.4'

_space_group_crystal_system       'triclinic'
_space_group_IT_number            1
_space_group_name_H-M_alt         'P 1'
_space_group_name_Hall            'P 1'
loop_
  _space_group_symop_operation_xyz
 'x, y, z'

_cell_length_a                    15.7342(6)
_cell_length_b                    16.0668(6)
_cell_length_c                    16.1856(6)
_cell_angle_alpha                 119.5499(16)
_cell_angle_beta                  100.2052(18)
_cell_angle_gamma                 92.9355(18)
_cell_volume                      3457.0(2)
_cell_formula_units_Z             2
_cell_measurement_reflns_used     9885
_cell_measurement_temperature     100(2)
_cell_measurement_theta_max       64.49
_cell_measurement_theta_min       5.79
_exptl_absorpt_coefficient_mu     4.713
_exptl_absorpt_correction_T_max   0.7526
_exptl_absorpt_correction_T_min   0.6674
_exptl_absorpt_correction_type    multi-scan
_exptl_absorpt_process_details
;
SADABS-2008/1 (Bruker,2008) was used for absorption correction.
wR2(int) was 0.0470 before and 0.0369 after correction.
The Ratio of minimum to maximum transmission is 0.8868.
The \l/2 correction factor is 0.0015.
;
_exptl_crystal_colour             colourless
_exptl_crystal_colour_primary     colourless
_exptl_crystal_density_diffrn     1.540
_exptl_crystal_density_meas       .
_exptl_crystal_density_method     ?
_exptl_crystal_description        block
_exptl_crystal_F_000              1596
_exptl_crystal_size_max           0.142
_exptl_crystal_size_mid           0.098
_exptl_crystal_size_min           0.055
_exptl_special_details
;
 ?
;
_exptl_transmission_factor_max    ?
_exptl_transmission_factor_min    ?
_diffrn_reflns_av_R_equivalents   0.0000
_diffrn_reflns_av_unetI/netI      0.0396
_diffrn_reflns_Laue_measured_fraction_full 0.911
_diffrn_reflns_Laue_measured_fraction_max 0.973
_diffrn_reflns_limit_h_max        18
_diffrn_reflns_limit_h_min        -17
_diffrn_reflns_limit_k_max        18
_diffrn_reflns_limit_k_min        -10
_diffrn_reflns_limit_l_max        15
_diffrn_reflns_limit_l_min        -18
_diffrn_reflns_number             13977
_diffrn_reflns_point_group_measured_fraction_full 0.558
_diffrn_reflns_point_group_measured_fraction_max 0.596
_diffrn_reflns_theta_full         67.679
_diffrn_reflns_theta_max          64.89
_diffrn_reflns_theta_min          2.89
_diffrn_ambient_temperature       99.97
_diffrn_detector_area_resol_mean  8
_diffrn_measured_fraction_theta_full 0.911
_diffrn_measured_fraction_theta_max 0.973
_diffrn_measurement_device_type   'Bruker Kappa APEX CCD area detector'
_diffrn_measurement_method        '\w and \f scans'
_diffrn_radiation_monochromator   'Quazar optics'
_diffrn_radiation_type            CuK\a
_diffrn_radiation_wavelength      1.54178
_diffrn_source                    microsource
_diffrn_standards_number          0
_reflns_Friedel_coverage          0.224
_reflns_Friedel_fraction_full     0.204
_reflns_Friedel_fraction_max      0.218
_reflns_number_gt                 13203
_reflns_number_total              13977
_reflns_special_details
;
 Data were apparently pre-merged, so _diffrn_reflns_number
 etc. will have to be added later.
 
 Reflections were merged by SHELXL according to the crystal
 class for the calculation of statistics and refinement.
 
 _reflns_Friedel_fraction is defined as the number of unique
 Friedel pairs measured divided by the number that would be
 possible theoretically, ignoring centric projections and
 systematic absences.
;
_reflns_threshold_expression      'I > 2\s(I)'
_computing_cell_refinement        'SAINT V7.23A (Bruker, 2005)'
_computing_data_collection        'APEX2 V2.1-4 (Bruker, 2007)'
_computing_data_reduction         'Bruker SAINT'
_computing_molecular_graphics
;
O. V. Dolomanov, L. J. Bourhis, R. J. Gildea, J. A. K. Howard and H. Puschmann,
OLEX2: a complete structure solution, refinement and analysis program.
J. Appl. Cryst. (2009). 42, 339-341.
;
_computing_publication_material
;
O. V. Dolomanov, L. J. Bourhis, R. J. Gildea, J. A. K. Howard and H. Puschmann,
OLEX2: a complete structure solution, refinement and analysis program.
J. Appl. Cryst. (2009). 42, 339-341.
;
_computing_structure_refinement
;
SHELXL, G.M. Sheldrick, Acta Cryst.
(2008). A64, 112-122
;
_computing_structure_solution
;
SHELXS, G.M. Sheldrick, Acta Cryst.
(2008). A64, 112-122
;
_refine_diff_density_max          1.163
_refine_diff_density_min          -0.559
_refine_diff_density_rms          0.122
_refine_ls_abs_structure_details
;
 Flack x determined using 2304 quotients [(I+)-(I-)]/[(I+)+(I-)]
 (Parsons and Flack (2004), Acta Cryst. A60, s61).
;
_refine_ls_abs_structure_Flack    0.194(16)
_refine_ls_extinction_coef        .
_refine_ls_extinction_method      none
_refine_ls_goodness_of_fit_ref    1.057
_refine_ls_hydrogen_treatment     constr
_refine_ls_matrix_type            full
_refine_ls_number_parameters      1640
_refine_ls_number_reflns          13977
_refine_ls_number_restraints      1593
_refine_ls_R_factor_all           0.0543
_refine_ls_R_factor_gt            0.0525
_refine_ls_restrained_S_all       1.010
_refine_ls_shift/su_max           0.001
_refine_ls_shift/su_mean          0.000
_refine_ls_structure_factor_coef  Fsqd
_refine_ls_weighting_details
;
 w=1/[\s^2^(Fo^2^)+(0.1051P)^2^+5.1009P]
 where P=(Fo^2^+2Fc^2^)/3
;
_refine_ls_weighting_scheme       calc
_refine_ls_wR_factor_gt           0.1458
_refine_ls_wR_factor_ref          0.1478
_refine_special_details
' The enhanced rigid-bond restraint (SHELX keyword RIGU) was applied globally. (Acta Cryst. A68 (2012) 448-451). C24 N1 C71 C37 and C53 were restrained that its Uij components approximate to isotropic. '
_olex2_refinement_description
;
1. Fixed Uiso
 At 1.2 times of:
  All C(H) groups, All C(H,H) groups, All C(H,H,H,H) groups
2. Uiso/Uaniso restraints and constraints
Uanis(C24) \\sim Ueq, Uanis(N1) \\sim Ueq, Uanis(C71) \\sim Ueq, Uanis(C37) \\sim Ueq, Uanis(C53) \\sim Ueq: with sigma of 0.005 and sigma for terminal atoms of 0.02
3. Others
 Sof(Br2A)=Sof(C32A)=Sof(H32A)=Sof(H32B)=Sof(H13C)=Sof(H13D)=1-FVAR(1)
 Sof(Br12)=Sof(H13A)=Sof(H13B)=Sof(C132)=Sof(H13E)=Sof(H13F)=FVAR(1)
4.a Ternary CH refined with riding coordinates:
 C15(H15), C20(H20), C35(H35), C40(H40), C55(H55), C60(H60), C75(H75),
 C80(H80), C94(H94), C99(H99), C114(H114), C119(H119)
4.b Secondary CH2 refined with riding coordinates:
 C121(H12A,H12B), C122(H12C,H12D), C32A(H32A,H32B), C131(H13C,H13D), C131(H13A,
 H13B), C132(H13E,H13F), C123(H12E,H12F), C124(H12G,H12H), C125(H12I,H12J),
 C126(H12K,H12L), C127(H12M,H12N), C128(H12O,H12P), C129(H12Q,H12R), C130(H13G,
 H13H), C16(H16A,H16B), C17(H17A,H17B), C18(H18A,H18B), C19(H19A,H19B),
 C36(H36A,H36B), C37(H37A,H37B), C38(H38A,H38B), C39(H39A,H39B), C56(H56A,H56B),
  C57(H57A,H57B), C58(H58A,H58B), C59(H59A,H59B), C76(H76A,H76B), C77(H77A,
 H77B), C78(H78A,H78B), C79(H79A,H79B), C95(H95A,H95B), C96(H96A,H96B),
 C97(H97A,H97B), C98(H98A,H98B), C115(H11A,H11B), C116(H11C,H11D), C117(H11E,
 H11F), C118(H11G,H11H)
4.c Aromatic/amide H refined with riding coordinates:
 C3(H3), C4(H4), C9(H9), C10(H10), C23(H23), C24(H24), C29(H29), C30(H30),
 C43(H43), C44(H44), C49(H49), C50(H50), C63(H63), C64(H64), C69(H69), C70(H70),
  C83(H83), C84(H84), C89(H89), C90(H90), C102(H102), C103(H103), C108(H108),
 C109(H109)
;
_atom_sites_solution_hydrogens    geom
_atom_sites_solution_primary      direct
_atom_sites_solution_secondary    ?
loop_
  _atom_site_label
  _atom_site_type_symbol
  _atom_site_fract_x
  _atom_site_fract_y
  _atom_site_fract_z
  _atom_site_U_iso_or_equiv
  _atom_site_adp_type
  _atom_site_occupancy
  _atom_site_site_symmetry_order
  _atom_site_calc_flag
  _atom_site_refinement_flags_posn
  _atom_site_refinement_flags_adp
  _atom_site_refinement_flags_occupancy
  _atom_site_disorder_assembly
  _atom_site_disorder_group
 Br1 Br 0.49015(8) 0.98841(10) 0.95616(10) 0.0569(3) Uani 1 1 d . U . . .
 Br2 Br 0.21720(8) 0.98499(10) 1.01937(11) 0.0597(4) Uani 1 1 d . U . . .
 C121 C 0.3701(8) 0.9477(10) 0.9528(10) 0.056(3) Uani 1 1 d . U . . .
 H12A H 0.3334 0.9185 0.8857 0.067 Uiso 1 1 calc R U . . .
 H12B H 0.3685 0.8986 0.9727 0.067 Uiso 1 1 calc R U . . .
 C122 C 0.3375(9) 1.0315(11) 1.0188(10) 0.061(3) Uani 1 1 d . U . . .
 H12C H 0.3353 1.0790 0.9966 0.073 Uiso 1 1 calc R U . . .
 H12D H 0.3760 1.0631 1.0852 0.073 Uiso 1 1 calc R U . . .
 Br2A Br 0.9429(3) 0.6665(3) 0.2540(3) 0.0738(12) Uani 0.444(4) 1 d . U P A 2
 Br11 Br 0.74494(8) 0.54440(9) 0.24393(9) 0.0490(3) Uani 1 1 d . U . . .
 Br12 Br 0.88053(14) 0.64233(15) 0.14878(15) 0.0449(7) Uani 0.556(4) 1 d . U P
 A 1
 C32A C 0.9148(16) 0.5722(19) 0.2092(17) 0.042(4) Uani 0.444(4) 1 d . U P A 2
 H32A H 0.9608 0.5530 0.2437 0.050 Uiso 0.444(4) 1 calc R U P A 2
 H32B H 0.9292 0.5506 0.1453 0.050 Uiso 0.444(4) 1 calc R U P A 2
 C131 C 0.8365(8) 0.4917(10) 0.1785(11) 0.055(3) Uani 1 1 d . U . . .
 H13C H 0.8574 0.4430 0.1944 0.067 Uiso 0.444(4) 1 calc R U P A 2
 H13D H 0.8130 0.4584 0.1070 0.067 Uiso 0.444(4) 1 calc R U P A 2
 H13A H 0.8864 0.4929 0.2262 0.067 Uiso 0.556(4) 1 calc R U P A 1
 H13B H 0.8148 0.4231 0.1271 0.067 Uiso 0.556(4) 1 calc R U P A 1
 C132 C 0.8746(17) 0.5548(15) 0.1242(16) 0.052(5) Uani 0.556(4) 1 d . U P A 1
 H13E H 0.9345 0.5400 0.1195 0.062 Uiso 0.556(4) 1 calc R U P A 1
 H13F H 0.8390 0.5196 0.0562 0.062 Uiso 0.556(4) 1 calc R U P A 1
 Br3 Br 0.70791(8) 0.97142(10) 0.98647(10) 0.0557(3) Uani 1 1 d . U . . .
 Br4 Br 1.00327(8) 1.01864(10) 1.00589(10) 0.0564(3) Uani 1 1 d . U . . .
 C123 C 0.8335(10) 0.9751(10) 0.9529(10) 0.062(3) Uani 1 1 d . U . . .
 H12E H 0.8425 0.9092 0.9059 0.074 Uiso 1 1 calc R U . . .
 H12F H 0.8392 1.0172 0.9250 0.074 Uiso 1 1 calc R U . . .
 C124 C 0.8889(11) 1.0101(19) 1.0359(13) 0.097(7) Uani 1 1 d . U . . .
 H12G H 0.8850 0.9666 1.0626 0.116 Uiso 1 1 calc R U . . .
 H12H H 0.8784 1.0749 1.0839 0.116 Uiso 1 1 calc R U . . .
 Br5 Br 1.05404(7) 0.20209(9) 0.67135(7) 0.0456(3) Uani 1 1 d . U . . .
 Br6 Br 0.76097(8) 0.10401(10) 0.51880(9) 0.0531(3) Uani 1 1 d . U . . .
 C125 C 0.9246(7) 0.1594(8) 0.6401(8) 0.040(2) Uani 1 1 d . U . . .
 H12I H 0.9126 0.0934 0.6297 0.048 Uiso 1 1 calc R U . . .
 H12J H 0.8997 0.2041 0.6949 0.048 Uiso 1 1 calc R U . . .
 C126 C 0.8851(9) 0.1597(12) 0.5524(11) 0.064(4) Uani 1 1 d . U . . .
 H12K H 0.9135 0.1200 0.4988 0.076 Uiso 1 1 calc R U . . .
 H12L H 0.8910 0.2267 0.5644 0.076 Uiso 1 1 calc R U . . .
 Br7 Br 0.52713(9) 0.65372(7) 0.42038(8) 0.0523(3) Uani 1 1 d . U . . .
 Br8 Br 0.39952(7) 0.68113(8) 0.22957(8) 0.0444(3) Uani 1 1 d . U . . .
 C127 C 0.4455(8) 0.5524(7) 0.2964(8) 0.045(2) Uani 1 1 d . U . . .
 H12M H 0.4621 0.4882 0.2794 0.055 Uiso 1 1 calc R U . . .
 H12N H 0.3855 0.5515 0.3071 0.055 Uiso 1 1 calc R U . . .
 C128 C 0.4451(7) 0.5671(7) 0.2153(8) 0.039(2) Uani 1 1 d . U . . .
 H12O H 0.4097 0.5097 0.1550 0.047 Uiso 1 1 calc R U . . .
 H12P H 0.5058 0.5718 0.2072 0.047 Uiso 1 1 calc R U . . .
 Br9 Br 0.93868(8) 0.87584(13) 0.47242(10) 0.0637(4) Uani 1 1 d . U . . .
 Br10 Br 0.64760(6) 0.79100(8) 0.31618(7) 0.0382(2) Uani 1 1 d . U . . .
 C129 C 0.8120(7) 0.8316(7) 0.4422(7) 0.036(2) Uani 1 1 d . U . . .
 H12Q H 0.8005 0.7644 0.4286 0.043 Uiso 1 1 calc R U . . .
 H12R H 0.7866 0.8742 0.4976 0.043 Uiso 1 1 calc R U . . .
 C130 C 0.7726(7) 0.8370(10) 0.3509(9) 0.049(3) Uani 1 1 d . U . . .
 H13G H 0.7995 0.7958 0.2964 0.059 Uiso 1 1 calc R U . . .
 H13H H 0.7834 0.9046 0.3653 0.059 Uiso 1 1 calc R U . . .
 O1 O -0.0831(3) 0.6586(5) 0.7209(4) 0.0252(12) Uani 1 1 d . U . . .
 O2 O -0.0074(4) 0.8699(5) 1.2292(4) 0.0345(15) Uani 1 1 d . U . . .
 O3 O 0.2799(3) 0.8476(4) 1.2481(4) 0.0206(11) Uani 1 1 d . U . . .
 O4 O 0.2052(4) 0.6275(5) 0.7392(4) 0.0267(12) Uani 1 1 d . U . . .
 O5 O 0.0578(3) 1.0827(4) 1.3840(4) 0.0220(12) Uani 1 1 d . U . . .
 O6 O -0.0158(4) 1.3589(4) 1.1571(5) 0.0246(12) Uani 1 1 d . U . . .
 O7 O 0.2743(4) 1.3943(5) 1.1626(5) 0.0281(13) Uani 1 1 d . U . . .
 O8 O 0.3340(4) 1.0726(4) 1.3342(4) 0.0254(12) Uani 1 1 d . U . . .
 O9 O -0.0299(4) 1.2783(4) 0.9272(4) 0.0288(13) Uani 1 1 d . U . . .
 O10 O -0.1251(4) 0.7734(4) 0.6111(4) 0.0238(12) Uani 1 1 d . U . . .
 O11 O 0.1649(3) 0.7609(4) 0.6370(4) 0.0189(11) Uani 1 1 d . U . . .
 O12 O 0.2590(5) 1.2674(5) 0.9363(8) 0.071(3) Uani 1 1 d . U . . .
 N1 N 0.0626(4) 0.6514(4) 0.7283(4) 0.0124(11) Uani 1 1 d . U . . .
 N2 N 0.1384(4) 0.8639(4) 1.2409(5) 0.0189(12) Uani 1 1 d . U . . .
 N3 N 0.1960(4) 1.0728(4) 1.3572(4) 0.0135(11) Uani 1 1 d . U . . .
 N4 N 0.1266(4) 1.3679(4) 1.1484(4) 0.0145(12) Uani 1 1 d . U . . .
 N5 N 0.1150(4) 1.2750(4) 0.9388(4) 0.0134(11) Uani 1 1 d . U . . .
 N6 N 0.0202(4) 0.7643(4) 0.6351(4) 0.0153(12) Uani 1 1 d . U . . .
 C1 C -0.0095(5) 0.6758(5) 0.7718(5) 0.0164(14) Uani 1 1 d . U . . .
 C2 C 0.0060(5) 0.7190(5) 0.8794(5) 0.0133(13) Uani 1 1 d . U . . .
 C3 C -0.0607(5) 0.7405(7) 0.9226(6) 0.0253(17) Uani 1 1 d . U . . .
 H3 H -0.1183 0.7275 0.8844 0.030 Uiso 1 1 calc R U . . .
 C4 C -0.0468(5) 0.7821(6) 1.0242(6) 0.0237(16) Uani 1 1 d . U . . .
 H4 H -0.0948 0.7978 1.0544 0.028 Uiso 1 1 calc R U . . .
 C5 C 0.0365(5) 0.8002(6) 1.0802(6) 0.0186(15) Uani 1 1 d . U . . .
 C6 C 0.0507(5) 0.8496(6) 1.1886(6) 0.0213(15) Uani 1 1 d . U . . .
 C7 C 0.2087(5) 0.8375(5) 1.2016(5) 0.0150(13) Uani 1 1 d . U . . .
 C8 C 0.1913(5) 0.7881(5) 1.0913(5) 0.0143(13) Uani 1 1 d . U . . .
 C9 C 0.2578(5) 0.7541(5) 1.0448(6) 0.0179(14) Uani 1 1 d . U . . .
 H9 H 0.3143 0.7611 1.0823 0.022 Uiso 1 1 calc R U . . .
 C10 C 0.2437(5) 0.7090(5) 0.9424(6) 0.0172(14) Uani 1 1 d . U . . .
 H10 H 0.2894 0.6829 0.9109 0.021 Uiso 1 1 calc R U . . .
 C11 C 0.1629(5) 0.7032(5) 0.8883(6) 0.0159(13) Uani 1 1 d . U . . .
 C12 C 0.1468(5) 0.6585(6) 0.7807(6) 0.0214(15) Uani 1 1 d . U . . .
 C13 C 0.0931(5) 0.7349(5) 0.9346(6) 0.0170(14) Uani 1 1 d . U . . .
 C14 C 0.1077(5) 0.7779(5) 1.0367(6) 0.0172(14) Uani 1 1 d . U . . .
 C15 C 0.1522(5) 0.9182(5) 1.3510(5) 0.0155(14) Uani 1 1 d . U . . .
 H15 H 0.0942 0.9351 1.3657 0.019 Uiso 1 1 calc R U . . .
 C16 C 0.1797(5) 0.8548(6) 1.3939(6) 0.0227(16) Uani 1 1 d . U . . .
 H16A H 0.2377 0.8376 1.3824 0.027 Uiso 1 1 calc R U . . .
 H16B H 0.1371 0.7940 1.3606 0.027 Uiso 1 1 calc R U . . .
 C17 C 0.1842(6) 0.9083(6) 1.5045(6) 0.0238(16) Uani 1 1 d . U . . .
 H17A H 0.2061 0.8683 1.5319 0.029 Uiso 1 1 calc R U . . .
 H17B H 0.1251 0.9197 1.5161 0.029 Uiso 1 1 calc R U . . .
 C18 C 0.2464(5) 1.0061(6) 1.5548(5) 0.0216(16) Uani 1 1 d . U . . .
 H18A H 0.2474 1.0419 1.6254 0.026 Uiso 1 1 calc R U . . .
 H18B H 0.3064 0.9936 1.5480 0.026 Uiso 1 1 calc R U . . .
 C19 C 0.2188(5) 1.0681(5) 1.5119(5) 0.0189(15) Uani 1 1 d . U . . .
 H19A H 0.2613 1.1289 1.5443 0.023 Uiso 1 1 calc R U . . .
 H19B H 0.1606 1.0851 1.5228 0.023 Uiso 1 1 calc R U . . .
 C20 C 0.2149(5) 1.0119(5) 1.4015(5) 0.0169(14) Uani 1 1 d . U . . .
 H20 H 0.2744 0.9948 1.3939 0.020 Uiso 1 1 calc R U . . .
 C21 C 0.1139(4) 1.1036(5) 1.3509(5) 0.0163(14) Uani 1 1 d . U . . .
 C22 C 0.1007(4) 1.1634(5) 1.3046(5) 0.0148(14) Uani 1 1 d . U . . .
 C23 C 0.0203(5) 1.1929(6) 1.2928(6) 0.0201(15) Uani 1 1 d . U . . .
 H23 H -0.0253 1.1757 1.3156 0.024 Uiso 1 1 calc R U . . .
 C24 C 0.0058(4) 1.2477(5) 1.2478(5) 0.0136(13) Uani 1 1 d . U . . .
 H24 H -0.0508 1.2635 1.2359 0.016 Uiso 1 1 calc R U . . .
 C25 C 0.0725(5) 1.2785(5) 1.2211(5) 0.0163(14) Uani 1 1 d . U . . .
 C26 C 0.0583(5) 1.3372(6) 1.1734(6) 0.0192(15) Uani 1 1 d . U . . .
 C27 C 0.2144(5) 1.3554(6) 1.1737(6) 0.0190(15) Uani 1 1 d . U . . .
 C28 C 0.2282(5) 1.2916(6) 1.2158(6) 0.0199(15) Uani 1 1 d . U . . .
 C29 C 0.3090(5) 1.2698(7) 1.2356(6) 0.0269(18) Uani 1 1 d . U . . .
 H29 H 0.3574 1.2964 1.2234 0.032 Uiso 1 1 calc R U . . .
 C30 C 0.3215(5) 1.2087(7) 1.2737(6) 0.0245(17) Uani 1 1 d . U . . .
 H30 H 0.3780 1.1926 1.2846 0.029 Uiso 1 1 calc R U . . .
 C31 C 0.2540(5) 1.1712(6) 1.2957(5) 0.0155(14) Uani 1 1 d . U . . .
 C32 C 0.2665(5) 1.1019(6) 1.3299(5) 0.0162(14) Uani 1 1 d . U . . .
 C33 C 0.1678(4) 1.1961(5) 1.2785(5) 0.0111(12) Uani 1 1 d . U . . .
 C34 C 0.1591(4) 1.2542(5) 1.2380(5) 0.0114(13) Uani 1 1 d . U . . .
 C35 C 0.1102(5) 1.4239(5) 1.0983(5) 0.0154(14) Uani 1 1 d . U . . .
 H35 H 0.0452 1.4187 1.0797 0.018 Uiso 1 1 calc R U . . .
 C36 C 0.1463(5) 1.5315(5) 1.1626(5) 0.0187(15) Uani 1 1 d . U . . .
 H36A H 0.2111 1.5409 1.1798 0.022 Uiso 1 1 calc R U . . .
 H36B H 0.1257 1.5584 1.2238 0.022 Uiso 1 1 calc R U . . .
 C37 C 0.1159(6) 1.5858(6) 1.1083(6) 0.0253(17) Uani 1 1 d . U . . .
 H37A H 0.0515 1.5818 1.0967 0.030 Uiso 1 1 calc R U . . .
 H37B H 0.1425 1.6551 1.1492 0.030 Uiso 1 1 calc R U . . .
 C38 C 0.1424(6) 1.5415(5) 1.0122(6) 0.0278(18) Uani 1 1 d . U . . .
 H38A H 0.2071 1.5519 1.0247 0.033 Uiso 1 1 calc R U . . .
 H38B H 0.1201 1.5748 0.9770 0.033 Uiso 1 1 calc R U . . .
 C39 C 0.1072(6) 1.4320(5) 0.9471(6) 0.0235(17) Uani 1 1 d . U . . .
 H39A H 0.0425 1.4209 0.9312 0.028 Uiso 1 1 calc R U . . .
 H39B H 0.1268 1.4054 0.8853 0.028 Uiso 1 1 calc R U . . .
 C40 C 0.1418(5) 1.3809(5) 1.0019(5) 0.0168(14) Uani 1 1 d . U . . .
 H40 H 0.2072 1.3953 1.0191 0.020 Uiso 1 1 calc R U . . .
 C41 C 0.0279(5) 1.2303(5) 0.9038(6) 0.0195(15) Uani 1 1 d . U . . .
 C42 C 0.0089(5) 1.1244(5) 0.8373(5) 0.0151(14) Uani 1 1 d . U . . .
 C43 C -0.0805(5) 1.0766(5) 0.7960(6) 0.0160(14) Uani 1 1 d . U . . .
 H43 H -0.1274 1.1123 0.8102 0.019 Uiso 1 1 calc R U . . .
 C44 C -0.0961(5) 0.9775(5) 0.7355(6) 0.0180(14) Uani 1 1 d . U . . .
 H44 H -0.1550 0.9455 0.7063 0.022 Uiso 1 1 calc R U . . .
 C45 C -0.0303(5) 0.9228(5) 0.7153(6) 0.0180(15) Uani 1 1 d . U . . .
 C46 C -0.0504(5) 0.8177(5) 0.6497(6) 0.0175(14) Uani 1 1 d . U . . .
 C47 C 0.1095(5) 0.8089(5) 0.6612(5) 0.0164(14) Uani 1 1 d . U . . .
 C48 C 0.1263(5) 0.9164(6) 0.7237(5) 0.0150(13) Uani 1 1 d . U . . .
 C49 C 0.2115(5) 0.9626(5) 0.7526(5) 0.0198(15) Uani 1 1 d . U . . .
 H49 H 0.2568 0.9260 0.7315 0.024 Uiso 1 1 calc R U . . .
 C50 C 0.2313(5) 1.0644(6) 0.8137(6) 0.0267(18) Uani 1 1 d . U . . .
 H50 H 0.2899 1.0964 0.8332 0.032 Uiso 1 1 calc R U . . .
 C51 C 0.1651(5) 1.1180(5) 0.8455(5) 0.0184(15) Uani 1 1 d . U . . .
 C52 C 0.1852(5) 1.2241(6) 0.9080(6) 0.0240(17) Uani 1 1 d . U . . .
 C53 C 0.0764(5) 1.0696(5) 0.8135(5) 0.0128(13) Uani 1 1 d . U . . .
 C54 C 0.0579(5) 0.9690(5) 0.7489(5) 0.0132(13) Uani 1 1 d . U . . .
 C55 C -0.0022(5) 0.6583(5) 0.5771(5) 0.0171(14) Uani 1 1 d . U . . .
 H55 H -0.0652 0.6420 0.5743 0.021 Uiso 1 1 calc R U . . .
 C56 C 0.0067(6) 0.6115(6) 0.4696(6) 0.0242(17) Uani 1 1 d . U . . .
 H56A H -0.0215 0.6472 0.4398 0.029 Uiso 1 1 calc R U . . .
 H56B H 0.0694 0.6165 0.4685 0.029 Uiso 1 1 calc R U . . .
 C57 C -0.0345(6) 0.5088(6) 0.4123(6) 0.0254(17) Uani 1 1 d . U . . .
 H57A H -0.0264 0.4799 0.3449 0.031 Uiso 1 1 calc R U . . .
 H57B H -0.0981 0.5042 0.4091 0.031 Uiso 1 1 calc R U . . .
 C58 C 0.0069(6) 0.4504(6) 0.4602(6) 0.0278(18) Uani 1 1 d . U . . .
 H58A H -0.0272 0.3843 0.4260 0.033 Uiso 1 1 calc R U . . .
 H58B H 0.0676 0.4444 0.4518 0.033 Uiso 1 1 calc R U . . .
 C59 C 0.0079(6) 0.5004(5) 0.5693(6) 0.0224(16) Uani 1 1 d . U . . .
 H59A H -0.0528 0.4962 0.5774 0.027 Uiso 1 1 calc R U . . .
 H59B H 0.0409 0.4665 0.5984 0.027 Uiso 1 1 calc R U . . .
 C60 C 0.0498(5) 0.6055(5) 0.6221(5) 0.0187(15) Uani 1 1 d . U . . .
 H60 H 0.1094 0.6065 0.6086 0.022 Uiso 1 1 calc R U . . .
 O13 O 0.7715(4) 0.7324(5) 1.0740(6) 0.048(2) Uani 1 1 d . U . . .
 O14 O 0.8157(3) 1.2355(4) 1.3890(4) 0.0185(11) Uani 1 1 d . U . . .
 O15 O 0.5185(4) 1.2073(4) 1.3503(5) 0.0325(15) Uani 1 1 d . U . . .
 O16 O 0.4745(4) 0.7063(4) 1.0277(4) 0.0286(13) Uani 1 1 d . U . . .
 O17 O 0.8214(4) 1.3214(5) 1.2563(4) 0.0277(13) Uani 1 1 d . U . . .
 O18 O 0.6916(4) 1.1159(5) 0.7500(4) 0.0308(14) Uani 1 1 d . U . . .
 O19 O 0.4088(3) 1.1525(4) 0.7739(4) 0.0202(11) Uani 1 1 d . U . . .
 O20 O 0.5404(4) 1.3590(4) 1.2815(4) 0.0247(12) Uani 1 1 d . U . . .
 O21 O 0.6866(3) 0.8974(4) 0.6160(4) 0.0199(11) Uani 1 1 d . U . . .
 O22 O 0.6986(4) 0.6182(4) 0.8388(5) 0.0264(13) Uani 1 1 d . U . . .
 O23 O 0.4035(4) 0.5951(5) 0.8008(6) 0.0374(16) Uani 1 1 d . U . . .
 O24 O 0.4005(3) 0.9153(4) 0.6245(4) 0.0214(11) Uani 1 1 d . U . . .
 N7 N 0.6233(4) 0.7186(4) 1.0458(5) 0.0170(12) Uani 1 1 d . U . . .
 N8 N 0.6661(4) 1.2225(5) 1.3627(5) 0.0186(13) Uani 1 1 d . U . . .
 N9 N 0.6812(4) 1.3377(4) 1.2709(5) 0.0152(11) Uani 1 1 d . U . . .
 N10 N 0.5485(4) 1.1223(5) 0.7565(5) 0.0164(12) Uani 1 1 d . U . . .
 N11 N 0.5458(4) 0.9148(4) 0.6267(4) 0.0131(11) Uani 1 1 d . U . . .
 N12 N 0.5537(4) 0.6150(4) 0.8323(4) 0.0139(12) Uani 1 1 d . U . . .
 C01V C 0.5934(5) 1.3333(5) 1.2327(5) 0.0164(14) Uani 1 1 d . U . . .
 C61 C 0.7086(5) 0.7708(6) 1.0893(6) 0.0229(16) Uani 1 1 d . U . . .
 C62 C 0.7158(5) 0.8766(6) 1.1541(6) 0.0211(15) Uani 1 1 d . U . . .
 C63 C 0.7978(5) 0.9355(6) 1.2036(6) 0.0252(17) Uani 1 1 d . U . . .
 H63 H 0.8488 0.9064 1.1924 0.030 Uiso 1 1 calc R U . . .
 C64 C 0.8076(5) 1.0329(6) 1.2672(6) 0.0205(16) Uani 1 1 d . U . . .
 H64 H 0.8645 1.0701 1.2996 0.025 Uiso 1 1 calc R U . . .
 C65 C 0.7336(5) 1.0777(6) 1.2845(5) 0.0165(14) Uani 1 1 d . U . . .
 C66 C 0.7441(5) 1.1842(5) 1.3497(6) 0.0206(15) Uani 1 1 d . U . . .
 C67 C 0.5829(5) 1.1677(6) 1.3244(6) 0.0199(15) Uani 1 1 d . U . . .
 C68 C 0.5734(5) 1.0651(6) 1.2585(6) 0.0194(15) Uani 1 1 d . U . . .
 C69 C 0.4930(4) 1.0048(5) 1.2178(5) 0.0139(13) Uani 1 1 d . U . . .
 H69 H 0.4421 1.0323 1.2338 0.017 Uiso 1 1 calc R U . . .
 C70 C 0.4845(5) 0.9070(6) 1.1555(6) 0.0177(14) Uani 1 1 d . U . . .
 H70 H 0.4283 0.8678 1.1290 0.021 Uiso 1 1 calc R U . . .
 C71 C 0.5572(4) 0.8657(5) 1.1315(5) 0.0116(13) Uani 1 1 d . U . . .
 C72 C 0.5473(5) 0.7557(5) 1.0632(6) 0.0196(15) Uani 1 1 d . U . . .
 C73 C 0.6415(5) 0.9217(5) 1.1750(5) 0.0159(14) Uani 1 1 d . U . . .
 C74 C 0.6493(5) 1.0199(5) 1.2349(5) 0.0154(14) Uani 1 1 d . U . . .
 C75 C 0.6706(5) 1.3305(5) 1.4212(5) 0.0176(14) Uani 1 1 d . U . . .
 H75 H 0.6089 1.3432 1.4188 0.021 Uiso 1 1 calc R U . . .
 C76 C 0.7142(5) 1.3701(6) 1.5276(6) 0.0236(16) Uani 1 1 d . U . . .
 H76A H 0.7765 1.3616 1.5345 0.028 Uiso 1 1 calc R U . . .
 H76B H 0.6847 1.3355 1.5537 0.028 Uiso 1 1 calc R U . . .
 C77 C 0.7065(6) 1.4850(6) 1.5867(6) 0.0298(18) Uani 1 1 d . U . . .
 H77A H 0.6441 1.4927 1.5832 0.036 Uiso 1 1 calc R U . . .
 H77B H 0.7367 1.5144 1.6563 0.036 Uiso 1 1 calc R U . . .
 C78 C 0.7471(6) 1.5356(6) 1.5428(6) 0.0271(17) Uani 1 1 d . U . . .
 H78A H 0.8102 1.5305 1.5497 0.032 Uiso 1 1 calc R U . . .
 H78B H 0.7421 1.6052 1.5791 0.032 Uiso 1 1 calc R U . . .
 C79 C 0.7033(6) 1.4923(6) 1.4336(6) 0.0298(19) Uani 1 1 d . U . . .
 H79A H 0.7319 1.5270 1.4069 0.036 Uiso 1 1 calc R U . . .
 H79B H 0.6406 1.4989 1.4256 0.036 Uiso 1 1 calc R U . . .
 C80 C 0.7133(5) 1.3838(5) 1.3790(5) 0.0172(14) Uani 1 1 d . U . . .
 H80 H 0.7773 1.3810 1.3920 0.021 Uiso 1 1 calc R U . . .
 C81 C 0.7462(4) 1.3111(5) 1.2185(5) 0.0135(13) Uani 1 1 d . U . . .
 C82 C 0.7167(5) 1.2665(6) 1.1098(6) 0.0237(16) Uani 1 1 d . U . . .
 C83 C 0.7795(5) 1.2424(6) 1.0550(6) 0.0236(17) Uani 1 1 d . U . . .
 H83 H 0.8396 1.2522 1.0851 0.028 Uiso 1 1 calc R U . . .
 C84 C 0.7510(5) 1.2021(6) 0.9515(6) 0.0226(17) Uani 1 1 d . U . . .
 H84 H 0.7937 1.1874 0.9137 0.027 Uiso 1 1 calc R U . . .
 C85 C 0.6658(5) 1.1843(5) 0.9056(5) 0.0167(14) Uani 1 1 d . U . . .
 C86 C 0.6383(5) 1.1401(5) 0.7987(5) 0.0149(13) Uani 1 1 d . U . . .
 C87 C 0.4849(5) 1.1613(5) 0.8140(5) 0.0141(13) Uani 1 1 d . U . . .
 C88 C 0.5136(5) 1.2069(5) 0.9220(5) 0.0150(13) Uani 1 1 d . U . . .
 C89 C 0.4551(5) 1.2451(6) 0.9778(6) 0.0217(15) Uani 1 1 d . U . . .
 H89 H 0.3970 1.2445 0.9483 0.026 Uiso 1 1 calc R U . . .
 C90 C 0.4814(5) 1.2861(6) 1.0809(6) 0.0232(16) Uani 1 1 d . U . . .
 H90 H 0.4400 1.3110 1.1197 0.028 Uiso 1 1 calc R U . . .
 C91 C 0.5647(5) 1.2901(5) 1.1242(5) 0.0165(14) Uani 1 1 d . U . . .
 C92 C 0.6291(5) 1.2576(5) 1.0667(5) 0.0129(13) Uani 1 1 d . U . . .
 C93 C 0.6026(5) 1.2163(5) 0.9637(5) 0.0146(13) Uani 1 1 d . U . . .
 C94 C 0.5152(5) 1.0772(5) 0.6500(5) 0.0155(14) Uani 1 1 d . U . . .
 H94 H 0.4500 1.0625 0.6360 0.019 Uiso 1 1 calc R U . . .
 C95 C 0.5371(5) 1.1484(5) 0.6153(5) 0.0157(14) Uani 1 1 d . U . . .
 H95A H 0.5177 1.2110 0.6550 0.019 Uiso 1 1 calc R U . . .
 H95B H 0.6010 1.1607 0.6222 0.019 Uiso 1 1 calc R U . . .
 C96 C 0.4894(6) 1.1019(5) 0.5090(6) 0.0225(16) Uani 1 1 d . U . . .
 H96A H 0.5057 1.1440 0.4839 0.027 Uiso 1 1 calc R U . . .
 H96B H 0.4256 1.0976 0.5047 0.027 Uiso 1 1 calc R U . . .
 C97 C 0.5098(5) 0.9995(6) 0.4436(5) 0.0197(15) Uani 1 1 d . U . . .
 H97A H 0.4720 0.9709 0.3771 0.024 Uiso 1 1 calc R U . . .
 H97B H 0.5714 1.0049 0.4386 0.024 Uiso 1 1 calc R U . . .
 C98 C 0.4957(5) 0.9342(5) 0.4814(5) 0.0154(14) Uani 1 1 d . U . . .
 H98A H 0.5151 0.8719 0.4410 0.019 Uiso 1 1 calc R U . . .
 H98B H 0.4325 0.9208 0.4775 0.019 Uiso 1 1 calc R U . . .
 C99 C 0.5474(5) 0.9814(5) 0.5884(5) 0.0167(14) Uani 1 1 d . U . . .
 H99 H 0.6099 0.9985 0.5898 0.020 Uiso 1 1 calc R U . . .
 C100 C 0.6255(4) 0.8784(5) 0.6402(5) 0.0112(13) Uani 1 1 d . U . . .
 C101 C 0.6245(4) 0.8176(5) 0.6845(5) 0.0108(12) Uani 1 1 d . U . . .
 C102 C 0.7014(5) 0.7861(5) 0.7061(5) 0.0137(14) Uani 1 1 d . U . . .
 H102 H 0.7530 0.8040 0.6918 0.016 Uiso 1 1 calc R U . . .
 C103 C 0.7041(5) 0.7274(5) 0.7493(6) 0.0192(15) Uani 1 1 d . U . . .
 H103 H 0.7568 0.7058 0.7636 0.023 Uiso 1 1 calc R U . . .
 C104 C 0.6301(5) 0.7028(5) 0.7697(5) 0.0149(13) Uani 1 1 d . U . . .
 C105 C 0.6325(5) 0.6421(5) 0.8163(5) 0.0150(14) Uani 1 1 d . U . . .
 C106 C 0.4715(5) 0.6309(5) 0.7968(6) 0.0167(14) Uani 1 1 d . U . . .
 C107 C 0.4697(5) 0.6955(5) 0.7555(5) 0.0134(13) Uani 1 1 d . U . . .
 C108 C 0.3916(5) 0.7168(5) 0.7247(6) 0.0168(14) Uani 1 1 d . U . . .
 H108 H 0.3382 0.6902 0.7287 0.020 Uiso 1 1 calc R U . . .
 C109 C 0.3920(5) 0.7800(5) 0.6864(5) 0.0169(14) Uani 1 1 d . U . . .
 H109 H 0.3384 0.7970 0.6667 0.020 Uiso 1 1 calc R U . . .
 C110 C 0.4697(5) 0.8174(5) 0.6772(5) 0.0158(14) Uani 1 1 d . U . . .
 C111 C 0.4658(5) 0.8849(5) 0.6395(5) 0.0169(14) Uani 1 1 d . U . . .
 C112 C 0.5475(5) 0.7891(5) 0.7023(6) 0.0174(14) Uani 1 1 d . U . . .
 C113 C 0.5508(5) 0.7294(5) 0.7434(5) 0.0135(13) Uani 1 1 d . U . . .
 C114 C 0.5529(5) 0.5612(5) 0.8854(5) 0.0169(14) Uani 1 1 d . U . . .
 H114 H 0.4929 0.5573 0.8970 0.020 Uiso 1 1 calc R U . . .
 C115 C 0.5687(6) 0.4573(6) 0.8238(6) 0.0277(18) Uani 1 1 d . U . . .
 H11A H 0.6295 0.4578 0.8152 0.033 Uiso 1 1 calc R U . . .
 H11B H 0.5283 0.4257 0.7585 0.033 Uiso 1 1 calc R U . . .
 C116 C 0.5536(6) 0.4001(6) 0.8751(6) 0.0271(18) Uani 1 1 d . U . . .
 H11C H 0.5689 0.3346 0.8382 0.032 Uiso 1 1 calc R U . . .
 H11D H 0.4909 0.3926 0.8760 0.032 Uiso 1 1 calc R U . . .
 C117 C 0.6106(6) 0.4540(6) 0.9820(6) 0.0275(18) Uani 1 1 d . U . . .
 H11E H 0.5954 0.4204 1.0160 0.033 Uiso 1 1 calc R U . . .
 H11F H 0.6732 0.4527 0.9808 0.033 Uiso 1 1 calc R U . . .
 C118 C 0.5954(7) 0.5586(6) 1.0371(6) 0.0299(19) Uani 1 1 d . U . . .
 H11G H 0.5336 0.5601 1.0419 0.036 Uiso 1 1 calc R U . . .
 H11H H 0.6330 0.5923 1.1041 0.036 Uiso 1 1 calc R U . . .
 C119 C 0.6167(5) 0.6101(5) 0.9841(5) 0.0195(15) Uani 1 1 d . U . . .
 H119 H 0.6760 0.5973 0.9714 0.023 Uiso 1 1 calc R U . . .

loop_
  _atom_site_aniso_label
  _atom_site_aniso_U_11
  _atom_site_aniso_U_22
  _atom_site_aniso_U_33
  _atom_site_aniso_U_23
  _atom_site_aniso_U_13
  _atom_site_aniso_U_12
 Br1 0.0421(6) 0.0661(8) 0.0717(8) 0.0392(7) 0.0216(6) 0.0110(6)
 Br2 0.0399(6) 0.0661(8) 0.0922(10) 0.0513(8) 0.0244(6) 0.0125(6)
 C121 0.049(6) 0.057(6) 0.067(7) 0.035(5) 0.013(5) 0.005(5)
 C122 0.058(7) 0.068(7) 0.063(7) 0.038(6) 0.021(5) 0.006(5)
 Br2A 0.076(2) 0.061(2) 0.075(2) 0.0259(17) 0.0275(18) -0.0009(16)
 Br11 0.0512(7) 0.0551(7) 0.0568(7) 0.0397(6) 0.0134(5) 0.0135(5)
 Br12 0.0573(13) 0.0466(12) 0.0552(13) 0.0374(10) 0.0284(10) 0.0264(9)
 C32A 0.044(9) 0.059(7) 0.036(10) 0.033(7) 0.014(7) 0.011(6)
 C131 0.052(6) 0.055(6) 0.090(8) 0.050(6) 0.040(6) 0.028(5)
 C132 0.074(13) 0.037(6) 0.051(10) 0.029(6) 0.014(9) 0.013(7)
 Br3 0.0340(6) 0.0640(8) 0.0704(8) 0.0356(7) 0.0124(5) 0.0043(5)
 Br4 0.0365(6) 0.0656(8) 0.0703(8) 0.0361(7) 0.0161(5) 0.0073(5)
 C123 0.077(7) 0.049(7) 0.063(6) 0.031(6) 0.013(5) 0.019(5)
 C124 0.055(7) 0.170(19) 0.070(7) 0.065(9) 0.020(5) 0.000(7)
 Br5 0.0362(6) 0.0590(7) 0.0322(5) 0.0156(5) 0.0101(4) 0.0089(5)
 Br6 0.0407(6) 0.0765(8) 0.0443(6) 0.0347(6) 0.0069(5) -0.0039(6)
 C125 0.040(5) 0.039(5) 0.048(5) 0.026(4) 0.015(4) 0.010(4)
 C126 0.044(6) 0.093(10) 0.072(7) 0.059(7) 0.005(5) -0.006(6)
 Br7 0.0810(9) 0.0245(5) 0.0386(6) 0.0132(4) -0.0068(5) 0.0089(5)
 Br8 0.0494(6) 0.0392(6) 0.0528(6) 0.0338(5) -0.0004(5) 0.0023(5)
 C127 0.065(7) 0.029(5) 0.040(5) 0.017(4) 0.008(4) 0.015(5)
 C128 0.045(6) 0.022(4) 0.044(5) 0.014(4) 0.004(4) 0.014(4)
 Br9 0.0287(6) 0.1224(12) 0.0664(8) 0.0719(9) 0.0019(5) -0.0016(6)
 Br10 0.0311(5) 0.0486(6) 0.0310(5) 0.0175(4) 0.0079(4) 0.0042(4)
 C129 0.044(5) 0.032(5) 0.036(5) 0.020(4) 0.013(4) 0.010(4)
 C130 0.038(5) 0.077(8) 0.055(6) 0.048(6) 0.014(4) 0.011(5)
 O1 0.013(2) 0.044(3) 0.025(3) 0.022(3) 0.007(2) 0.004(2)
 O2 0.018(3) 0.053(4) 0.014(3) 0.006(3) -0.004(2) 0.006(3)
 O3 0.018(2) 0.013(2) 0.018(2) 0.001(2) -0.0016(19) 0.0003(19)
 O4 0.021(3) 0.039(3) 0.029(3) 0.021(3) 0.012(2) 0.009(2)
 O5 0.008(2) 0.039(3) 0.040(3) 0.032(3) 0.014(2) 0.016(2)
 O6 0.017(3) 0.035(3) 0.044(3) 0.034(3) 0.010(2) 0.011(2)
 O7 0.017(3) 0.045(3) 0.053(4) 0.047(3) 0.008(2) 0.010(2)
 O8 0.024(3) 0.034(3) 0.040(3) 0.031(3) 0.015(2) 0.018(2)
 O9 0.018(3) 0.013(3) 0.036(3) 0.000(2) 0.002(2) 0.003(2)
 O10 0.023(3) 0.010(2) 0.032(3) 0.007(2) 0.005(2) 0.0008(19)
 O11 0.016(2) 0.016(2) 0.031(3) 0.013(2) 0.013(2) 0.008(2)
 O12 0.019(3) 0.023(4) 0.109(7) -0.014(4) 0.023(3) -0.001(3)
 N1 0.015(2) 0.008(2) 0.017(2) 0.0077(19) 0.0075(19) -0.0027(19)
 N2 0.018(3) 0.012(3) 0.024(3) 0.009(2) 0.001(2) -0.001(2)
 N3 0.015(3) 0.017(3) 0.006(2) 0.003(2) 0.004(2) 0.004(2)
 N4 0.021(3) 0.009(3) 0.011(3) 0.004(2) 0.000(2) 0.004(2)
 N5 0.012(3) 0.008(2) 0.020(3) 0.007(2) 0.003(2) 0.002(2)
 N6 0.017(3) 0.007(3) 0.020(3) 0.006(2) 0.005(2) 0.001(2)
 C1 0.012(3) 0.017(3) 0.022(3) 0.011(3) 0.003(2) 0.002(2)
 C2 0.013(3) 0.003(3) 0.022(3) 0.007(2) 0.001(2) -0.003(2)
 C3 0.014(3) 0.040(5) 0.022(3) 0.015(3) 0.004(3) 0.011(3)
 C4 0.010(3) 0.031(4) 0.023(3) 0.010(3) 0.000(3) 0.005(3)
 C5 0.012(3) 0.026(4) 0.017(3) 0.012(3) -0.002(2) 0.004(3)
 C6 0.015(3) 0.022(4) 0.020(3) 0.008(3) -0.003(2) -0.001(3)
 C7 0.012(3) 0.012(3) 0.017(3) 0.006(3) -0.003(2) -0.004(2)
 C8 0.013(3) 0.010(3) 0.023(3) 0.011(3) 0.005(2) 0.002(2)
 C9 0.013(3) 0.014(3) 0.028(3) 0.010(3) 0.008(3) 0.004(3)
 C10 0.016(3) 0.006(3) 0.029(3) 0.008(3) 0.006(3) 0.002(2)
 C11 0.018(3) 0.006(3) 0.026(3) 0.010(3) 0.007(2) 0.003(2)
 C12 0.017(3) 0.022(4) 0.028(3) 0.015(3) 0.007(2) 0.000(3)
 C13 0.014(3) 0.012(3) 0.021(3) 0.005(3) 0.003(2) 0.003(2)
 C14 0.018(3) 0.008(3) 0.026(3) 0.009(3) 0.004(2) 0.004(2)
 C15 0.009(3) 0.015(3) 0.018(3) 0.006(3) 0.000(2) 0.004(2)
 C16 0.021(4) 0.022(4) 0.028(4) 0.016(3) 0.000(3) 0.000(3)
 C17 0.025(4) 0.018(4) 0.027(4) 0.012(3) 0.002(3) -0.004(3)
 C18 0.023(4) 0.028(4) 0.014(3) 0.011(3) 0.006(3) 0.006(3)
 C19 0.028(4) 0.012(3) 0.015(3) 0.005(3) 0.007(3) 0.004(3)
 C20 0.015(3) 0.022(3) 0.017(3) 0.010(3) 0.008(2) 0.006(3)
 C21 0.004(3) 0.020(3) 0.022(3) 0.009(3) 0.002(2) 0.000(2)
 C22 0.006(3) 0.023(3) 0.019(3) 0.013(3) 0.003(2) 0.001(2)
 C23 0.010(3) 0.025(4) 0.027(4) 0.015(3) 0.005(3) 0.001(3)
 C24 0.005(3) 0.014(3) 0.017(3) 0.004(2) 0.001(2) 0.007(2)
 C25 0.013(3) 0.016(3) 0.020(3) 0.009(3) 0.003(2) 0.006(2)
 C26 0.022(3) 0.021(3) 0.019(3) 0.013(3) 0.004(3) 0.011(3)
 C27 0.012(3) 0.034(4) 0.023(4) 0.024(3) 0.000(2) 0.004(3)
 C28 0.014(3) 0.027(4) 0.026(4) 0.021(3) 0.001(3) 0.003(3)
 C29 0.012(3) 0.050(5) 0.034(4) 0.031(4) 0.007(3) 0.009(3)
 C30 0.013(3) 0.040(4) 0.039(5) 0.031(4) 0.012(3) 0.014(3)
 C31 0.013(3) 0.024(3) 0.015(3) 0.014(3) 0.003(2) 0.005(2)
 C32 0.016(3) 0.025(4) 0.012(3) 0.012(3) 0.007(2) 0.005(3)
 C33 0.010(3) 0.010(3) 0.010(3) 0.003(2) 0.002(2) 0.000(2)
 C34 0.008(3) 0.015(3) 0.014(3) 0.011(3) 0.000(2) 0.001(2)
 C35 0.018(3) 0.009(3) 0.016(3) 0.007(2) -0.003(3) 0.002(2)
 C36 0.031(4) 0.010(3) 0.015(3) 0.007(3) 0.005(3) -0.004(3)
 C37 0.035(4) 0.015(3) 0.033(3) 0.018(3) 0.004(3) 0.006(3)
 C38 0.046(5) 0.009(3) 0.026(4) 0.011(3) -0.002(3) -0.004(3)
 C39 0.034(4) 0.006(3) 0.025(4) 0.008(3) -0.006(3) -0.003(3)
 C40 0.027(4) 0.003(3) 0.021(3) 0.006(2) 0.008(3) 0.000(2)
 C41 0.021(3) 0.014(3) 0.020(3) 0.005(3) 0.009(3) 0.003(2)
 C42 0.012(3) 0.014(3) 0.022(3) 0.010(3) 0.006(2) -0.001(2)
 C43 0.009(3) 0.013(3) 0.025(4) 0.010(3) 0.000(3) 0.003(2)
 C44 0.013(3) 0.016(3) 0.022(3) 0.009(3) 0.003(3) -0.004(2)
 C45 0.023(3) 0.005(3) 0.023(3) 0.005(3) 0.005(3) 0.001(2)
 C46 0.017(3) 0.013(3) 0.024(3) 0.011(3) 0.006(3) 0.002(2)
 C47 0.017(3) 0.012(3) 0.012(3) 0.001(2) 0.000(2) -0.002(2)
 C48 0.017(3) 0.026(3) 0.007(3) 0.012(2) 0.002(2) 0.003(2)
 C49 0.014(3) 0.014(3) 0.019(3) -0.001(3) 0.004(3) 0.004(2)
 C50 0.009(3) 0.023(4) 0.032(4) 0.005(3) -0.002(3) -0.002(3)
 C51 0.016(3) 0.015(3) 0.019(3) 0.005(3) 0.003(3) 0.001(2)
 C52 0.018(3) 0.016(3) 0.030(4) 0.004(3) 0.010(3) 0.008(3)
 C53 0.017(3) 0.017(3) 0.009(3) 0.011(2) 0.000(2) -0.001(2)
 C54 0.018(3) 0.010(3) 0.011(3) 0.007(2) 0.000(2) -0.003(2)
 C55 0.014(3) 0.013(3) 0.020(3) 0.006(3) 0.001(3) 0.000(2)
 C56 0.033(4) 0.015(3) 0.023(3) 0.008(3) 0.008(3) 0.004(3)
 C57 0.030(4) 0.019(4) 0.017(3) 0.003(3) 0.001(3) 0.003(3)
 C58 0.036(5) 0.017(4) 0.022(4) 0.006(3) 0.002(3) -0.002(3)
 C59 0.034(4) 0.008(3) 0.021(3) 0.002(3) 0.010(3) 0.007(3)
 C60 0.024(4) 0.013(3) 0.016(3) 0.004(2) 0.006(3) 0.010(3)
 O13 0.019(3) 0.018(3) 0.067(5) -0.008(3) 0.008(3) 0.002(2)
 O14 0.010(2) 0.011(2) 0.025(3) 0.005(2) -0.0035(19) 0.0011(18)
 O15 0.015(3) 0.014(3) 0.051(4) 0.003(3) 0.009(2) 0.003(2)
 O16 0.020(3) 0.015(3) 0.038(3) 0.006(2) 0.004(2) -0.007(2)
 O17 0.015(3) 0.037(3) 0.018(3) 0.004(2) 0.005(2) 0.005(2)
 O18 0.018(3) 0.041(4) 0.018(3) 0.002(2) 0.008(2) 0.005(2)
 O19 0.011(2) 0.031(3) 0.020(3) 0.014(2) 0.0029(19) 0.001(2)
 O20 0.027(3) 0.029(3) 0.014(2) 0.005(2) 0.011(2) 0.010(2)
 O21 0.015(2) 0.030(3) 0.023(3) 0.018(2) 0.008(2) 0.004(2)
 O22 0.012(2) 0.032(3) 0.046(3) 0.028(3) 0.007(2) 0.008(2)
 O23 0.018(3) 0.055(4) 0.065(4) 0.053(4) 0.001(3) -0.005(3)
 O24 0.014(2) 0.024(3) 0.033(3) 0.021(2) -0.001(2) 0.005(2)
 N7 0.019(3) 0.010(3) 0.023(3) 0.010(2) 0.004(2) 0.002(2)
 N8 0.009(3) 0.022(3) 0.021(3) 0.010(2) -0.003(2) 0.005(2)
 N9 0.015(3) 0.006(3) 0.021(3) 0.005(2) 0.005(2) -0.001(2)
 N10 0.013(3) 0.018(3) 0.017(3) 0.010(2) 0.000(2) 0.001(2)
 N11 0.013(3) 0.014(3) 0.013(3) 0.008(2) 0.002(2) 0.002(2)
 N12 0.016(3) 0.013(3) 0.019(3) 0.013(2) 0.002(2) 0.004(2)
 C01V 0.020(3) 0.008(3) 0.013(3) 0.000(2) 0.004(2) -0.005(2)
 C61 0.021(3) 0.019(3) 0.024(4) 0.005(3) 0.011(3) 0.003(3)
 C62 0.020(3) 0.014(3) 0.026(4) 0.007(3) 0.005(3) 0.002(2)
 C63 0.021(4) 0.023(4) 0.027(4) 0.007(3) 0.011(3) 0.006(3)
 C64 0.007(3) 0.021(3) 0.026(4) 0.006(3) 0.005(3) -0.002(2)
 C65 0.007(3) 0.022(3) 0.022(3) 0.012(3) 0.005(2) 0.002(2)
 C66 0.020(3) 0.017(3) 0.019(3) 0.006(3) 0.002(3) 0.002(2)
 C67 0.016(3) 0.020(3) 0.022(3) 0.011(3) 0.000(3) 0.002(2)
 C68 0.011(3) 0.019(3) 0.023(3) 0.006(3) 0.007(3) 0.000(2)
 C69 0.005(3) 0.021(3) 0.023(3) 0.016(3) 0.006(2) 0.001(2)
 C70 0.011(3) 0.020(3) 0.035(4) 0.022(3) 0.009(3) 0.004(2)
 C71 0.013(3) 0.012(3) 0.016(3) 0.013(2) 0.003(2) -0.001(2)
 C72 0.019(3) 0.013(3) 0.029(4) 0.012(3) 0.006(3) -0.005(2)
 C73 0.013(3) 0.017(3) 0.016(3) 0.007(2) 0.005(2) 0.000(2)
 C74 0.017(3) 0.017(3) 0.014(3) 0.008(2) 0.007(2) 0.002(2)
 C75 0.015(3) 0.015(3) 0.016(3) 0.004(2) 0.002(3) 0.007(2)
 C76 0.020(4) 0.025(4) 0.018(3) 0.004(3) 0.008(3) 0.002(3)
 C77 0.022(4) 0.025(4) 0.020(4) 0.000(3) -0.007(3) 0.005(3)
 C78 0.027(4) 0.010(3) 0.022(4) -0.005(3) 0.000(3) -0.003(3)
 C79 0.030(4) 0.015(4) 0.026(4) 0.000(3) -0.003(3) 0.004(3)
 C80 0.014(3) 0.010(3) 0.016(3) -0.001(2) 0.002(2) 0.010(2)
 C81 0.008(3) 0.011(3) 0.019(3) 0.006(3) 0.001(2) 0.001(2)
 C82 0.020(3) 0.030(4) 0.019(3) 0.011(3) 0.004(2) 0.004(3)
 C83 0.015(3) 0.030(4) 0.014(3) 0.003(3) 0.002(3) 0.007(3)
 C84 0.009(3) 0.036(4) 0.015(3) 0.006(3) 0.006(2) 0.008(3)
 C85 0.013(3) 0.014(3) 0.017(3) 0.004(3) 0.001(2) 0.002(2)
 C86 0.013(3) 0.012(3) 0.014(3) 0.003(2) 0.002(2) 0.002(2)
 C87 0.017(3) 0.009(3) 0.013(3) 0.005(2) 0.000(2) -0.002(2)
 C88 0.015(3) 0.014(3) 0.017(3) 0.010(2) 0.001(2) -0.002(2)
 C89 0.019(3) 0.022(4) 0.022(3) 0.011(3) 0.003(3) -0.005(3)
 C90 0.017(3) 0.031(4) 0.019(3) 0.012(3) 0.003(3) -0.001(3)
 C91 0.015(3) 0.015(3) 0.017(3) 0.006(3) 0.003(2) 0.003(2)
 C92 0.016(3) 0.007(3) 0.018(3) 0.007(2) 0.005(2) 0.003(2)
 C93 0.015(3) 0.007(3) 0.020(3) 0.006(2) 0.003(2) -0.002(2)
 C94 0.017(3) 0.012(3) 0.013(3) 0.005(2) -0.002(2) 0.000(2)
 C95 0.020(4) 0.010(3) 0.017(3) 0.007(3) 0.005(3) 0.000(3)
 C96 0.033(4) 0.016(3) 0.023(4) 0.015(3) 0.002(3) 0.003(3)
 C97 0.027(4) 0.023(4) 0.011(3) 0.009(3) 0.008(3) 0.008(3)
 C98 0.019(3) 0.015(3) 0.013(3) 0.007(3) 0.004(3) 0.005(3)
 C99 0.017(3) 0.017(3) 0.018(3) 0.011(3) 0.003(3) 0.005(3)
 C100 0.013(3) 0.007(3) 0.011(3) 0.002(2) 0.003(2) 0.002(2)
 C101 0.010(3) 0.009(3) 0.010(3) 0.001(2) 0.006(2) 0.000(2)
 C102 0.017(3) 0.009(3) 0.017(3) 0.006(3) 0.008(3) 0.007(2)
 C103 0.026(4) 0.016(3) 0.020(4) 0.010(3) 0.010(3) 0.007(3)
 C104 0.022(3) 0.008(3) 0.013(3) 0.003(3) 0.007(2) 0.005(2)
 C105 0.024(3) 0.008(3) 0.018(3) 0.009(3) 0.006(3) 0.007(2)
 C106 0.016(3) 0.016(3) 0.026(4) 0.015(3) 0.009(3) 0.005(2)
 C107 0.016(3) 0.008(3) 0.013(3) 0.002(3) 0.008(2) 0.002(2)
 C108 0.016(3) 0.011(3) 0.031(4) 0.017(3) 0.006(3) 0.001(3)
 C109 0.016(3) 0.012(3) 0.021(4) 0.010(3) -0.003(3) -0.004(2)
 C110 0.016(3) 0.012(3) 0.018(3) 0.007(3) 0.003(2) 0.005(2)
 C111 0.014(3) 0.015(3) 0.021(4) 0.008(3) 0.005(2) 0.007(2)
 C112 0.013(3) 0.015(3) 0.025(4) 0.011(3) 0.005(2) 0.004(2)
 C113 0.014(3) 0.006(3) 0.016(3) 0.001(3) 0.008(2) 0.005(2)
 C114 0.016(3) 0.016(3) 0.023(3) 0.015(3) -0.002(3) 0.002(3)
 C115 0.043(5) 0.016(3) 0.028(4) 0.016(3) 0.003(3) 0.006(3)
 C116 0.050(5) 0.011(3) 0.022(4) 0.009(3) 0.006(3) 0.008(3)
 C117 0.040(5) 0.022(4) 0.024(4) 0.016(3) 0.000(3) -0.002(3)
 C118 0.045(5) 0.024(4) 0.024(4) 0.015(3) 0.010(4) 0.003(3)
 C119 0.027(4) 0.013(3) 0.020(3) 0.010(3) 0.002(3) 0.004(3)

_geom_special_details
;
 All esds (except the esd in the dihedral angle between two l.s. planes)
 are estimated using the full covariance matrix.  The cell esds are taken
 into account individually in the estimation of esds in distances, angles
 and torsion angles; correlations between esds in cell parameters are only
 used when they are defined by crystal symmetry.  An approximate (isotropic)
 treatment of cell esds is used for estimating esds involving l.s. planes.
;
loop_
  _geom_bond_atom_site_label_1
  _geom_bond_atom_site_label_2
  _geom_bond_distance
  _geom_bond_site_symmetry_2
  _geom_bond_publ_flag
 Br1 C121 1.949(13) . ?
 Br2 C122 2.003(14) . ?
 C121 H12A 0.9900 . ?
 C121 H12B 0.9900 . ?
 C121 C122 1.437(18) . ?
 C122 H12C 0.9900 . ?
 C122 H12D 0.9900 . ?
 Br2A C32A 1.32(3) . ?
 Br11 C131 1.923(11) . ?
 Br12 C132 1.25(2) . ?
 C32A H32A 0.9900 . ?
 C32A H32B 0.9900 . ?
 C32A C131 1.56(3) . ?
 C131 H13C 0.9900 . ?
 C131 H13D 0.9900 . ?
 C131 H13A 0.9900 . ?
 C131 H13B 0.9900 . ?
 C131 C132 1.78(2) . ?
 C132 H13E 0.9900 . ?
 C132 H13F 0.9900 . ?
 Br3 C123 2.145(16) . ?
 Br4 C124 1.960(16) . ?
 C123 H12E 0.9900 . ?
 C123 H12F 0.9900 . ?
 C123 C124 1.29(2) . ?
 C124 H12G 0.9900 . ?
 C124 H12H 0.9900 . ?
 Br5 C125 2.006(11) . ?
 Br6 C126 1.969(13) . ?
 C125 H12I 0.9900 . ?
 C125 H12J 0.9900 . ?
 C125 C126 1.447(17) . ?
 C126 H12K 0.9900 . ?
 C126 H12L 0.9900 . ?
 Br7 C127 1.994(11) . ?
 Br8 C128 1.923(9) . ?
 C127 H12M 0.9900 . ?
 C127 H12N 0.9900 . ?
 C127 C128 1.444(16) . ?
 C128 H12O 0.9900 . ?
 C128 H12P 0.9900 . ?
 Br9 C129 1.971(11) . ?
 Br10 C130 1.943(12) . ?
 C129 H12Q 0.9900 . ?
 C129 H12R 0.9900 . ?
 C129 C130 1.544(14) . ?
 C130 H13G 0.9900 . ?
 C130 H13H 0.9900 . ?
 O1 C1 1.225(9) . ?
 O2 C6 1.185(11) . ?
 O3 C7 1.187(9) . ?
 O4 C12 1.216(10) . ?
 O5 C21 1.222(10) . ?
 O6 C26 1.254(10) . ?
 O7 C27 1.193(10) . ?
 O8 C32 1.188(10) . ?
 O9 C41 1.214(10) . ?
 O10 C46 1.221(10) . ?
 O11 C47 1.184(9) . ?
 O12 C52 1.207(11) . ?
 N1 C1 1.411(9) . ?
 N1 C12 1.407(10) . ?
 N1 C60 1.467(9) . ?
 N2 C6 1.427(10) . ?
 N2 C7 1.355(10) . ?
 N2 C15 1.515(10) . ?
 N3 C20 1.486(10) . ?
 N3 C21 1.411(9) . ?
 N3 C32 1.404(10) . ?
 N4 C26 1.364(11) . ?
 N4 C27 1.423(10) . ?
 N4 C35 1.485(9) . ?
 N5 C40 1.476(9) . ?
 N5 C41 1.392(10) . ?
 N5 C52 1.422(9) . ?
 N6 C46 1.420(10) . ?
 N6 C47 1.433(10) . ?
 N6 C55 1.466(9) . ?
 C1 C2 1.488(11) . ?
 C2 C3 1.329(11) . ?
 C2 C13 1.431(10) . ?
 C3 H3 0.9500 . ?
 C3 C4 1.404(12) . ?
 C4 H4 0.9500 . ?
 C4 C5 1.379(11) . ?
 C5 C6 1.492(11) . ?
 C5 C14 1.398(11) . ?
 C7 C8 1.516(10) . ?
 C8 C9 1.376(10) . ?
 C8 C14 1.401(11) . ?
 C9 H9 0.9500 . ?
 C9 C10 1.411(11) . ?
 C10 H10 0.9500 . ?
 C10 C11 1.379(11) . ?
 C11 C12 1.485(11) . ?
 C11 C13 1.415(10) . ?
 C13 C14 1.407(11) . ?
 C15 H15 1.0000 . ?
 C15 C16 1.529(10) . ?
 C15 C20 1.502(10) . ?
 C16 H16A 0.9900 . ?
 C16 H16B 0.9900 . ?
 C16 C17 1.542(12) . ?
 C17 H17A 0.9900 . ?
 C17 H17B 0.9900 . ?
 C17 C18 1.545(11) . ?
 C18 H18A 0.9900 . ?
 C18 H18B 0.9900 . ?
 C18 C19 1.510(11) . ?
 C19 H19A 0.9900 . ?
 C19 H19B 0.9900 . ?
 C19 C20 1.540(10) . ?
 C20 H20 1.0000 . ?
 C21 C22 1.485(11) . ?
 C22 C23 1.388(10) . ?
 C22 C33 1.374(10) . ?
 C23 H23 0.9500 . ?
 C23 C24 1.397(11) . ?
 C24 H24 0.9500 . ?
 C24 C25 1.361(11) . ?
 C25 C26 1.487(10) . ?
 C25 C34 1.454(10) . ?
 C27 C28 1.490(10) . ?
 C28 C29 1.362(11) . ?
 C28 C34 1.398(11) . ?
 C29 H29 0.9500 . ?
 C29 C30 1.399(12) . ?
 C30 H30 0.9500 . ?
 C30 C31 1.378(12) . ?
 C31 C32 1.476(10) . ?
 C31 C33 1.451(10) . ?
 C33 C34 1.380(10) . ?
 C35 H35 1.0000 . ?
 C35 C36 1.519(10) . ?
 C35 C40 1.550(10) . ?
 C36 H36A 0.9900 . ?
 C36 H36B 0.9900 . ?
 C36 C37 1.554(10) . ?
 C37 H37A 0.9900 . ?
 C37 H37B 0.9900 . ?
 C37 C38 1.507(13) . ?
 C38 H38A 0.9900 . ?
 C38 H38B 0.9900 . ?
 C38 C39 1.543(10) . ?
 C39 H39A 0.9900 . ?
 C39 H39B 0.9900 . ?
 C39 C40 1.532(10) . ?
 C40 H40 1.0000 . ?
 C41 C42 1.473(10) . ?
 C42 C43 1.436(10) . ?
 C42 C53 1.399(11) . ?
 C43 H43 0.9500 . ?
 C43 C44 1.376(11) . ?
 C44 H44 0.9500 . ?
 C44 C45 1.371(11) . ?
 C45 C46 1.462(10) . ?
 C45 C54 1.414(11) . ?
 C47 C48 1.488(11) . ?
 C48 C49 1.378(11) . ?
 C48 C54 1.396(11) . ?
 C49 H49 0.9500 . ?
 C49 C50 1.412(11) . ?
 C50 H50 0.9500 . ?
 C50 C51 1.391(11) . ?
 C51 C52 1.470(11) . ?
 C51 C53 1.434(11) . ?
 C53 C54 1.403(10) . ?
 C55 H55 1.0000 . ?
 C55 C56 1.555(11) . ?
 C55 C60 1.546(10) . ?
 C56 H56A 0.9900 . ?
 C56 H56B 0.9900 . ?
 C56 C57 1.474(11) . ?
 C57 H57A 0.9900 . ?
 C57 H57B 0.9900 . ?
 C57 C58 1.583(12) . ?
 C58 H58A 0.9900 . ?
 C58 H58B 0.9900 . ?
 C58 C59 1.535(12) . ?
 C59 H59A 0.9900 . ?
 C59 H59B 0.9900 . ?
 C59 C60 1.510(11) . ?
 C60 H60 1.0000 . ?
 O13 C61 1.192(11) . ?
 O14 C66 1.220(10) . ?
 O15 C67 1.250(10) . ?
 O16 C72 1.223(10) . ?
 O17 C81 1.193(9) . ?
 O18 C86 1.201(10) . ?
 O19 C87 1.222(9) . ?
 O20 C01V 1.199(9) . ?
 O21 C100 1.180(9) . ?
 O22 C105 1.187(9) . ?
 O23 C106 1.215(10) . ?
 O24 C111 1.197(9) . ?
 N7 C61 1.402(11) . ?
 N7 C72 1.375(10) . ?
 N7 C119 1.509(9) . ?
 N8 C66 1.403(10) . ?
 N8 C67 1.388(10) . ?
 N8 C75 1.502(10) . ?
 N9 C01V 1.393(10) . ?
 N9 C80 1.494(10) . ?
 N9 C81 1.394(10) . ?
 N10 C86 1.404(10) . ?
 N10 C87 1.441(10) . ?
 N10 C94 1.477(9) . ?
 N11 C99 1.479(9) . ?
 N11 C100 1.438(9) . ?
 N11 C111 1.410(10) . ?
 N12 C105 1.399(10) . ?
 N12 C106 1.409(10) . ?
 N12 C114 1.492(9) . ?
 C01V C91 1.501(10) . ?
 C61 C62 1.477(11) . ?
 C62 C63 1.401(12) . ?
 C62 C73 1.412(11) . ?
 C63 H63 0.9500 . ?
 C63 C64 1.364(12) . ?
 C64 H64 0.9500 . ?
 C64 C65 1.399(10) . ?
 C65 C66 1.481(11) . ?
 C65 C74 1.424(11) . ?
 C67 C68 1.436(11) . ?
 C68 C69 1.387(10) . ?
 C68 C74 1.440(10) . ?
 C69 H69 0.9500 . ?
 C69 C70 1.367(11) . ?
 C70 H70 0.9500 . ?
 C70 C71 1.372(10) . ?
 C71 C72 1.534(10) . ?
 C71 C73 1.410(10) . ?
 C73 C74 1.368(11) . ?
 C75 H75 1.0000 . ?
 C75 C76 1.516(11) . ?
 C75 C80 1.526(12) . ?
 C76 H76A 0.9900 . ?
 C76 H76B 0.9900 . ?
 C76 C77 1.631(12) . ?
 C77 H77A 0.9900 . ?
 C77 H77B 0.9900 . ?
 C77 C78 1.502(15) . ?
 C78 H78A 0.9900 . ?
 C78 H78B 0.9900 . ?
 C78 C79 1.545(12) . ?
 C79 H79A 0.9900 . ?
 C79 H79B 0.9900 . ?
 C79 C80 1.550(10) . ?
 C80 H80 1.0000 . ?
 C81 C82 1.502(11) . ?
 C82 C83 1.386(12) . ?
 C82 C92 1.396(11) . ?
 C83 H83 0.9500 . ?
 C83 C84 1.436(11) . ?
 C84 H84 0.9500 . ?
 C84 C85 1.351(11) . ?
 C85 C86 1.476(10) . ?
 C85 C93 1.429(10) . ?
 C87 C88 1.491(10) . ?
 C88 C89 1.359(11) . ?
 C88 C93 1.408(11) . ?
 C89 H89 0.9500 . ?
 C89 C90 1.426(11) . ?
 C90 H90 0.9500 . ?
 C90 C91 1.354(11) . ?
 C91 C92 1.440(10) . ?
 C92 C93 1.425(10) . ?
 C94 H94 1.0000 . ?
 C94 C95 1.551(10) . ?
 C94 C99 1.538(10) . ?
 C95 H95A 0.9900 . ?
 C95 H95B 0.9900 . ?
 C95 C96 1.515(10) . ?
 C96 H96A 0.9900 . ?
 C96 H96B 0.9900 . ?
 C96 C97 1.545(11) . ?
 C97 H97A 0.9900 . ?
 C97 H97B 0.9900 . ?
 C97 C98 1.477(11) . ?
 C98 H98A 0.9900 . ?
 C98 H98B 0.9900 . ?
 C98 C99 1.542(10) . ?
 C99 H99 1.0000 . ?
 C100 C101 1.470(10) . ?
 C101 C102 1.389(10) . ?
 C101 C112 1.399(11) . ?
 C102 H102 0.9500 . ?
 C102 C103 1.423(11) . ?
 C103 H103 0.9500 . ?
 C103 C104 1.356(12) . ?
 C104 C105 1.498(10) . ?
 C104 C113 1.401(10) . ?
 C106 C107 1.485(10) . ?
 C107 C108 1.368(11) . ?
 C107 C113 1.446(10) . ?
 C108 H108 0.9500 . ?
 C108 C109 1.426(10) . ?
 C109 H109 0.9500 . ?
 C109 C110 1.398(11) . ?
 C110 C111 1.483(10) . ?
 C110 C112 1.389(10) . ?
 C112 C113 1.409(11) . ?
 C114 H114 1.0000 . ?
 C114 C115 1.526(11) . ?
 C114 C119 1.514(10) . ?
 C115 H11A 0.9900 . ?
 C115 H11B 0.9900 . ?
 C115 C116 1.547(11) . ?
 C116 H11C 0.9900 . ?
 C116 H11D 0.9900 . ?
 C116 C117 1.562(11) . ?
 C117 H11E 0.9900 . ?
 C117 H11F 0.9900 . ?
 C117 C118 1.521(12) . ?
 C118 H11G 0.9900 . ?
 C118 H11H 0.9900 . ?
 C118 C119 1.517(11) . ?
 C119 H119 1.0000 . ?

loop_
  _geom_angle_atom_site_label_1
  _geom_angle_atom_site_label_2
  _geom_angle_atom_site_label_3
  _geom_angle
  _geom_angle_site_symmetry_1
  _geom_angle_site_symmetry_3
  _geom_angle_publ_flag
 Br1 C121 H12A 110.1 . . ?
 Br1 C121 H12B 110.1 . . ?
 H12A C121 H12B 108.4 . . ?
 C122 C121 Br1 108.2(9) . . ?
 C122 C121 H12A 110.1 . . ?
 C122 C121 H12B 110.1 . . ?
 Br2 C122 H12C 110.4 . . ?
 Br2 C122 H12D 110.4 . . ?
 C121 C122 Br2 106.8(9) . . ?
 C121 C122 H12C 110.4 . . ?
 C121 C122 H12D 110.4 . . ?
 H12C C122 H12D 108.6 . . ?
 Br2A C32A H32A 100.3 . . ?
 Br2A C32A H32B 100.3 . . ?
 Br2A C32A C131 146.1(19) . . ?
 H32A C32A H32B 104.3 . . ?
 C131 C32A H32A 100.3 . . ?
 C131 C32A H32B 100.3 . . ?
 Br11 C131 H13C 109.3 . . ?
 Br11 C131 H13D 109.3 . . ?
 Br11 C131 H13A 108.8 . . ?
 Br11 C131 H13B 108.8 . . ?
 C32A C131 Br11 111.5(12) . . ?
 C32A C131 H13C 109.3 . . ?
 C32A C131 H13D 109.3 . . ?
 H13C C131 H13D 108.0 . . ?
 H13A C131 H13B 107.7 . . ?
 C132 C131 Br11 113.9(10) . . ?
 C132 C131 H13A 108.8 . . ?
 C132 C131 H13B 108.8 . . ?
 Br12 C132 C131 131.2(17) . . ?
 Br12 C132 H13E 104.4 . . ?
 Br12 C132 H13F 104.4 . . ?
 C131 C132 H13E 104.4 . . ?
 C131 C132 H13F 104.4 . . ?
 H13E C132 H13F 105.6 . . ?
 Br3 C123 H12E 110.9 . . ?
 Br3 C123 H12F 110.9 . . ?
 H12E C123 H12F 108.9 . . ?
 C124 C123 Br3 104.5(11) . . ?
 C124 C123 H12E 110.9 . . ?
 C124 C123 H12F 110.9 . . ?
 Br4 C124 H12G 110.9 . . ?
 Br4 C124 H12H 110.9 . . ?
 C123 C124 Br4 104.3(11) . . ?
 C123 C124 H12G 110.9 . . ?
 C123 C124 H12H 110.9 . . ?
 H12G C124 H12H 108.9 . . ?
 Br5 C125 H12I 110.0 . . ?
 Br5 C125 H12J 110.0 . . ?
 H12I C125 H12J 108.4 . . ?
 C126 C125 Br5 108.3(8) . . ?
 C126 C125 H12I 110.0 . . ?
 C126 C125 H12J 110.0 . . ?
 Br6 C126 H12K 110.6 . . ?
 Br6 C126 H12L 110.6 . . ?
 C125 C126 Br6 105.8(8) . . ?
 C125 C126 H12K 110.6 . . ?
 C125 C126 H12L 110.6 . . ?
 H12K C126 H12L 108.7 . . ?
 Br7 C127 H12M 108.9 . . ?
 Br7 C127 H12N 108.9 . . ?
 H12M C127 H12N 107.7 . . ?
 C128 C127 Br7 113.5(8) . . ?
 C128 C127 H12M 108.9 . . ?
 C128 C127 H12N 108.9 . . ?
 Br8 C128 H12O 108.7 . . ?
 Br8 C128 H12P 108.7 . . ?
 C127 C128 Br8 114.2(7) . . ?
 C127 C128 H12O 108.7 . . ?
 C127 C128 H12P 108.7 . . ?
 H12O C128 H12P 107.6 . . ?
 Br9 C129 H12Q 110.7 . . ?
 Br9 C129 H12R 110.7 . . ?
 H12Q C129 H12R 108.8 . . ?
 C130 C129 Br9 105.4(7) . . ?
 C130 C129 H12Q 110.7 . . ?
 C130 C129 H12R 110.7 . . ?
 Br10 C130 H13G 110.3 . . ?
 Br10 C130 H13H 110.3 . . ?
 C129 C130 Br10 107.1(7) . . ?
 C129 C130 H13G 110.3 . . ?
 C129 C130 H13H 110.3 . . ?
 H13G C130 H13H 108.6 . . ?
 C1 N1 C60 120.2(6) . . ?
 C12 N1 C1 123.0(6) . . ?
 C12 N1 C60 116.4(6) . . ?
 C6 N2 C15 114.9(6) . . ?
 C7 N2 C6 126.3(7) . . ?
 C7 N2 C15 118.7(6) . . ?
 C21 N3 C20 120.7(6) . . ?
 C32 N3 C20 115.3(6) . . ?
 C32 N3 C21 123.9(6) . . ?
 C26 N4 C27 123.7(6) . . ?
 C26 N4 C35 118.5(6) . . ?
 C27 N4 C35 117.7(6) . . ?
 C41 N5 C40 122.9(6) . . ?
 C41 N5 C52 122.9(6) . . ?
 C52 N5 C40 113.8(6) . . ?
 C46 N6 C47 122.9(6) . . ?
 C46 N6 C55 117.0(6) . . ?
 C47 N6 C55 119.4(6) . . ?
 O1 C1 N1 120.1(7) . . ?
 O1 C1 C2 121.5(7) . . ?
 N1 C1 C2 118.4(6) . . ?
 C3 C2 C1 120.1(7) . . ?
 C3 C2 C13 120.9(7) . . ?
 C13 C2 C1 119.0(7) . . ?
 C2 C3 H3 119.7 . . ?
 C2 C3 C4 120.7(7) . . ?
 C4 C3 H3 119.7 . . ?
 C3 C4 H4 119.9 . . ?
 C5 C4 C3 120.1(7) . . ?
 C5 C4 H4 119.9 . . ?
 C4 C5 C6 119.3(7) . . ?
 C4 C5 C14 120.4(7) . . ?
 C14 C5 C6 120.1(7) . . ?
 O2 C6 N2 121.2(7) . . ?
 O2 C6 C5 122.8(7) . . ?
 N2 C6 C5 115.7(7) . . ?
 O3 C7 N2 123.7(7) . . ?
 O3 C7 C8 120.1(7) . . ?
 N2 C7 C8 116.1(6) . . ?
 C9 C8 C7 120.1(6) . . ?
 C9 C8 C14 119.8(7) . . ?
 C14 C8 C7 120.0(7) . . ?
 C8 C9 H9 119.4 . . ?
 C8 C9 C10 121.2(7) . . ?
 C10 C9 H9 119.4 . . ?
 C9 C10 H10 120.3 . . ?
 C11 C10 C9 119.4(7) . . ?
 C11 C10 H10 120.3 . . ?
 C10 C11 C12 120.6(7) . . ?
 C10 C11 C13 119.9(7) . . ?
 C13 C11 C12 119.3(7) . . ?
 O4 C12 N1 121.2(7) . . ?
 O4 C12 C11 120.3(7) . . ?
 N1 C12 C11 118.6(6) . . ?
 C11 C13 C2 121.4(7) . . ?
 C14 C13 C2 118.7(7) . . ?
 C14 C13 C11 119.8(7) . . ?
 C5 C14 C8 121.0(7) . . ?
 C5 C14 C13 119.1(7) . . ?
 C8 C14 C13 119.6(7) . . ?
 N2 C15 H15 106.8 . . ?
 N2 C15 C16 112.0(6) . . ?
 C16 C15 H15 106.8 . . ?
 C20 C15 N2 113.4(6) . . ?
 C20 C15 H15 106.8 . . ?
 C20 C15 C16 110.6(6) . . ?
 C15 C16 H16A 109.5 . . ?
 C15 C16 H16B 109.5 . . ?
 C15 C16 C17 110.9(6) . . ?
 H16A C16 H16B 108.0 . . ?
 C17 C16 H16A 109.5 . . ?
 C17 C16 H16B 109.5 . . ?
 C16 C17 H17A 109.9 . . ?
 C16 C17 H17B 109.9 . . ?
 C16 C17 C18 109.0(7) . . ?
 H17A C17 H17B 108.3 . . ?
 C18 C17 H17A 109.9 . . ?
 C18 C17 H17B 109.9 . . ?
 C17 C18 H18A 109.2 . . ?
 C17 C18 H18B 109.2 . . ?
 H18A C18 H18B 107.9 . . ?
 C19 C18 C17 112.2(6) . . ?
 C19 C18 H18A 109.2 . . ?
 C19 C18 H18B 109.2 . . ?
 C18 C19 H19A 109.8 . . ?
 C18 C19 H19B 109.8 . . ?
 C18 C19 C20 109.4(6) . . ?
 H19A C19 H19B 108.2 . . ?
 C20 C19 H19A 109.8 . . ?
 C20 C19 H19B 109.8 . . ?
 N3 C20 C15 113.0(6) . . ?
 N3 C20 C19 111.7(6) . . ?
 N3 C20 H20 107.0 . . ?
 C15 C20 C19 110.7(6) . . ?
 C15 C20 H20 107.0 . . ?
 C19 C20 H20 107.0 . . ?
 O5 C21 N3 120.6(7) . . ?
 O5 C21 C22 122.6(6) . . ?
 N3 C21 C22 116.8(6) . . ?
 C23 C22 C21 119.6(7) . . ?
 C33 C22 C21 121.8(6) . . ?
 C33 C22 C23 118.4(7) . . ?
 C22 C23 H23 119.6 . . ?
 C22 C23 C24 120.7(7) . . ?
 C24 C23 H23 119.6 . . ?
 C23 C24 H24 120.0 . . ?
 C25 C24 C23 120.0(6) . . ?
 C25 C24 H24 120.0 . . ?
 C24 C25 C26 120.8(6) . . ?
 C24 C25 C34 120.6(7) . . ?
 C34 C25 C26 118.5(7) . . ?
 O6 C26 N4 120.3(7) . . ?
 O6 C26 C25 120.2(7) . . ?
 N4 C26 C25 119.5(6) . . ?
 O7 C27 N4 122.0(7) . . ?
 O7 C27 C28 121.3(7) . . ?
 N4 C27 C28 116.7(7) . . ?
 C29 C28 C27 120.7(7) . . ?
 C29 C28 C34 118.2(7) . . ?
 C34 C28 C27 121.0(7) . . ?
 C28 C29 H29 119.7 . . ?
 C28 C29 C30 120.6(8) . . ?
 C30 C29 H29 119.7 . . ?
 C29 C30 H30 119.1 . . ?
 C31 C30 C29 121.7(7) . . ?
 C31 C30 H30 119.1 . . ?
 C30 C31 C32 121.2(6) . . ?
 C30 C31 C33 118.7(7) . . ?
 C33 C31 C32 119.9(7) . . ?
 O8 C32 N3 121.9(7) . . ?
 O8 C32 C31 120.8(7) . . ?
 N3 C32 C31 117.3(6) . . ?
 C22 C33 C31 119.5(7) . . ?
 C22 C33 C34 123.7(6) . . ?
 C34 C33 C31 116.8(6) . . ?
 C28 C34 C25 119.9(6) . . ?
 C33 C34 C25 116.2(6) . . ?
 C33 C34 C28 123.9(6) . . ?
 N4 C35 H35 106.4 . . ?
 N4 C35 C36 114.1(6) . . ?
 N4 C35 C40 113.0(6) . . ?
 C36 C35 H35 106.4 . . ?
 C36 C35 C40 110.1(6) . . ?
 C40 C35 H35 106.4 . . ?
 C35 C36 H36A 109.6 . . ?
 C35 C36 H36B 109.6 . . ?
 C35 C36 C37 110.3(6) . . ?
 H36A C36 H36B 108.1 . . ?
 C37 C36 H36A 109.6 . . ?
 C37 C36 H36B 109.6 . . ?
 C36 C37 H37A 109.6 . . ?
 C36 C37 H37B 109.6 . . ?
 H37A C37 H37B 108.2 . . ?
 C38 C37 C36 110.1(6) . . ?
 C38 C37 H37A 109.6 . . ?
 C38 C37 H37B 109.6 . . ?
 C37 C38 H38A 109.1 . . ?
 C37 C38 H38B 109.1 . . ?
 C37 C38 C39 112.3(7) . . ?
 H38A C38 H38B 107.9 . . ?
 C39 C38 H38A 109.1 . . ?
 C39 C38 H38B 109.1 . . ?
 C38 C39 H39A 109.9 . . ?
 C38 C39 H39B 109.9 . . ?
 H39A C39 H39B 108.3 . . ?
 C40 C39 C38 108.9(6) . . ?
 C40 C39 H39A 109.9 . . ?
 C40 C39 H39B 109.9 . . ?
 N5 C40 C35 113.3(6) . . ?
 N5 C40 C39 110.3(6) . . ?
 N5 C40 H40 108.1 . . ?
 C35 C40 H40 108.1 . . ?
 C39 C40 C35 108.7(6) . . ?
 C39 C40 H40 108.1 . . ?
 O9 C41 N5 120.2(7) . . ?
 O9 C41 C42 121.8(7) . . ?
 N5 C41 C42 118.0(6) . . ?
 C43 C42 C41 119.5(6) . . ?
 C53 C42 C41 121.1(7) . . ?
 C53 C42 C43 119.4(6) . . ?
 C42 C43 H43 121.0 . . ?
 C44 C43 C42 118.1(6) . . ?
 C44 C43 H43 121.0 . . ?
 C43 C44 H44 118.6 . . ?
 C45 C44 C43 122.9(7) . . ?
 C45 C44 H44 118.6 . . ?
 C44 C45 C46 120.7(7) . . ?
 C44 C45 C54 119.8(7) . . ?
 C54 C45 C46 119.1(7) . . ?
 O10 C46 N6 118.7(6) . . ?
 O10 C46 C45 123.1(7) . . ?
 N6 C46 C45 118.1(7) . . ?
 O11 C47 N6 120.6(7) . . ?
 O11 C47 C48 124.0(7) . . ?
 N6 C47 C48 115.4(6) . . ?
 C49 C48 C47 117.6(7) . . ?
 C49 C48 C54 121.2(7) . . ?
 C54 C48 C47 121.2(7) . . ?
 C48 C49 H49 120.1 . . ?
 C48 C49 C50 119.8(7) . . ?
 C50 C49 H49 120.1 . . ?
 C49 C50 H50 119.9 . . ?
 C51 C50 C49 120.1(7) . . ?
 C51 C50 H50 119.9 . . ?
 C50 C51 C52 120.3(7) . . ?
 C50 C51 C53 119.6(7) . . ?
 C53 C51 C52 120.0(7) . . ?
 O12 C52 N5 120.2(7) . . ?
 O12 C52 C51 121.9(7) . . ?
 N5 C52 C51 117.8(7) . . ?
 C42 C53 C51 119.6(6) . . ?
 C42 C53 C54 120.9(7) . . ?
 C54 C53 C51 119.1(7) . . ?
 C48 C54 C45 121.6(7) . . ?
 C48 C54 C53 119.8(7) . . ?
 C53 C54 C45 118.5(7) . . ?
 N6 C55 H55 106.7 . . ?
 N6 C55 C56 115.1(6) . . ?
 N6 C55 C60 114.2(6) . . ?
 C56 C55 H55 106.7 . . ?
 C60 C55 H55 106.7 . . ?
 C60 C55 C56 106.9(6) . . ?
 C55 C56 H56A 109.5 . . ?
 C55 C56 H56B 109.5 . . ?
 H56A C56 H56B 108.1 . . ?
 C57 C56 C55 110.8(7) . . ?
 C57 C56 H56A 109.5 . . ?
 C57 C56 H56B 109.5 . . ?
 C56 C57 H57A 109.5 . . ?
 C56 C57 H57B 109.5 . . ?
 C56 C57 C58 110.8(7) . . ?
 H57A C57 H57B 108.1 . . ?
 C58 C57 H57A 109.5 . . ?
 C58 C57 H57B 109.5 . . ?
 C57 C58 H58A 109.2 . . ?
 C57 C58 H58B 109.2 . . ?
 H58A C58 H58B 107.9 . . ?
 C59 C58 C57 111.8(7) . . ?
 C59 C58 H58A 109.2 . . ?
 C59 C58 H58B 109.2 . . ?
 C58 C59 H59A 109.5 . . ?
 C58 C59 H59B 109.5 . . ?
 H59A C59 H59B 108.0 . . ?
 C60 C59 C58 110.9(7) . . ?
 C60 C59 H59A 109.5 . . ?
 C60 C59 H59B 109.5 . . ?
 N1 C60 C55 114.6(6) . . ?
 N1 C60 C59 112.0(6) . . ?
 N1 C60 H60 106.8 . . ?
 C55 C60 H60 106.8 . . ?
 C59 C60 C55 109.3(6) . . ?
 C59 C60 H60 106.8 . . ?
 C61 N7 C119 115.5(6) . . ?
 C72 N7 C61 126.2(6) . . ?
 C72 N7 C119 117.9(6) . . ?
 C66 N8 C75 119.0(6) . . ?
 C67 N8 C66 124.8(7) . . ?
 C67 N8 C75 116.1(6) . . ?
 C01V N9 C80 118.9(6) . . ?
 C01V N9 C81 125.9(6) . . ?
 C81 N9 C80 114.9(6) . . ?
 C86 N10 C87 122.4(6) . . ?
 C86 N10 C94 121.5(6) . . ?
 C87 N10 C94 115.3(6) . . ?
 C100 N11 C99 116.7(6) . . ?
 C111 N11 C99 118.7(6) . . ?
 C111 N11 C100 124.4(6) . . ?
 C105 N12 C106 124.3(6) . . ?
 C105 N12 C114 120.0(6) . . ?
 C106 N12 C114 115.6(6) . . ?
 O20 C01V N9 123.2(7) . . ?
 O20 C01V C91 119.5(7) . . ?
 N9 C01V C91 117.2(6) . . ?
 O13 C61 N7 122.1(7) . . ?
 O13 C61 C62 121.9(8) . . ?
 N7 C61 C62 116.0(7) . . ?
 C63 C62 C61 120.9(7) . . ?
 C63 C62 C73 117.0(7) . . ?
 C73 C62 C61 121.9(7) . . ?
 C62 C63 H63 118.6 . . ?
 C64 C63 C62 122.9(7) . . ?
 C64 C63 H63 118.6 . . ?
 C63 C64 H64 120.1 . . ?
 C63 C64 C65 119.7(7) . . ?
 C65 C64 H64 120.1 . . ?
 C64 C65 C66 119.8(7) . . ?
 C64 C65 C74 118.7(7) . . ?
 C74 C65 C66 121.4(6) . . ?
 O14 C66 N8 122.0(7) . . ?
 O14 C66 C65 122.4(7) . . ?
 N8 C66 C65 115.6(7) . . ?
 O15 C67 N8 120.0(7) . . ?
 O15 C67 C68 121.2(7) . . ?
 N8 C67 C68 118.8(7) . . ?
 C67 C68 C74 120.3(7) . . ?
 C69 C68 C67 122.6(7) . . ?
 C69 C68 C74 117.0(7) . . ?
 C68 C69 H69 118.8 . . ?
 C70 C69 C68 122.4(7) . . ?
 C70 C69 H69 118.8 . . ?
 C69 C70 H70 120.1 . . ?
 C69 C70 C71 119.8(7) . . ?
 C71 C70 H70 120.1 . . ?
 C70 C71 C72 119.5(6) . . ?
 C70 C71 C73 120.8(7) . . ?
 C73 C71 C72 119.5(6) . . ?
 O16 C72 N7 123.8(7) . . ?
 O16 C72 C71 119.8(7) . . ?
 N7 C72 C71 116.4(6) . . ?
 C71 C73 C62 119.9(7) . . ?
 C74 C73 C62 121.2(7) . . ?
 C74 C73 C71 118.8(7) . . ?
 C65 C74 C68 118.4(7) . . ?
 C73 C74 C65 120.2(7) . . ?
 C73 C74 C68 121.0(7) . . ?
 N8 C75 H75 106.8 . . ?
 N8 C75 C76 110.9(6) . . ?
 N8 C75 C80 113.3(6) . . ?
 C76 C75 H75 106.8 . . ?
 C76 C75 C80 111.7(7) . . ?
 C80 C75 H75 106.8 . . ?
 C75 C76 H76A 110.3 . . ?
 C75 C76 H76B 110.3 . . ?
 C75 C76 C77 107.2(7) . . ?
 H76A C76 H76B 108.5 . . ?
 C77 C76 H76A 110.3 . . ?
 C77 C76 H76B 110.3 . . ?
 C76 C77 H77A 109.7 . . ?
 C76 C77 H77B 109.7 . . ?
 H77A C77 H77B 108.2 . . ?
 C78 C77 C76 109.7(7) . . ?
 C78 C77 H77A 109.7 . . ?
 C78 C77 H77B 109.7 . . ?
 C77 C78 H78A 109.2 . . ?
 C77 C78 H78B 109.2 . . ?
 C77 C78 C79 112.3(7) . . ?
 H78A C78 H78B 107.9 . . ?
 C79 C78 H78A 109.2 . . ?
 C79 C78 H78B 109.2 . . ?
 C78 C79 H79A 110.2 . . ?
 C78 C79 H79B 110.2 . . ?
 C78 C79 C80 107.7(7) . . ?
 H79A C79 H79B 108.5 . . ?
 C80 C79 H79A 110.2 . . ?
 C80 C79 H79B 110.2 . . ?
 N9 C80 C75 113.4(6) . . ?
 N9 C80 C79 111.8(6) . . ?
 N9 C80 H80 107.0 . . ?
 C75 C80 C79 110.3(7) . . ?
 C75 C80 H80 107.0 . . ?
 C79 C80 H80 107.0 . . ?
 O17 C81 N9 122.8(7) . . ?
 O17 C81 C82 120.8(7) . . ?
 N9 C81 C82 116.4(6) . . ?
 C83 C82 C81 118.5(7) . . ?
 C83 C82 C92 121.0(7) . . ?
 C92 C82 C81 120.2(7) . . ?
 C82 C83 H83 121.0 . . ?
 C82 C83 C84 118.1(7) . . ?
 C84 C83 H83 121.0 . . ?
 C83 C84 H84 118.7 . . ?
 C85 C84 C83 122.7(7) . . ?
 C85 C84 H84 118.7 . . ?
 C84 C85 C86 121.4(7) . . ?
 C84 C85 C93 118.5(7) . . ?
 C93 C85 C86 119.9(6) . . ?
 O18 C86 N10 121.8(7) . . ?
 O18 C86 C85 120.1(7) . . ?
 N10 C86 C85 117.9(6) . . ?
 O19 C87 N10 120.2(6) . . ?
 O19 C87 C88 121.5(7) . . ?
 N10 C87 C88 118.2(6) . . ?
 C89 C88 C87 119.3(7) . . ?
 C89 C88 C93 121.9(7) . . ?
 C93 C88 C87 118.6(7) . . ?
 C88 C89 H89 120.2 . . ?
 C88 C89 C90 119.5(7) . . ?
 C90 C89 H89 120.2 . . ?
 C89 C90 H90 119.6 . . ?
 C91 C90 C89 120.8(7) . . ?
 C91 C90 H90 119.6 . . ?
 C90 C91 C01V 121.4(7) . . ?
 C90 C91 C92 120.0(7) . . ?
 C92 C91 C01V 118.5(7) . . ?
 C82 C92 C91 121.5(7) . . ?
 C82 C92 C93 119.4(7) . . ?
 C93 C92 C91 119.1(7) . . ?
 C88 C93 C85 122.0(7) . . ?
 C88 C93 C92 118.2(7) . . ?
 C92 C93 C85 119.8(7) . . ?
 N10 C94 H94 107.2 . . ?
 N10 C94 C95 111.1(6) . . ?
 N10 C94 C99 114.5(6) . . ?
 C95 C94 H94 107.2 . . ?
 C99 C94 H94 107.2 . . ?
 C99 C94 C95 109.1(6) . . ?
 C94 C95 H95A 110.2 . . ?
 C94 C95 H95B 110.2 . . ?
 H95A C95 H95B 108.5 . . ?
 C96 C95 C94 107.4(6) . . ?
 C96 C95 H95A 110.2 . . ?
 C96 C95 H95B 110.2 . . ?
 C95 C96 H96A 108.9 . . ?
 C95 C96 H96B 108.9 . . ?
 C95 C96 C97 113.5(6) . . ?
 H96A C96 H96B 107.7 . . ?
 C97 C96 H96A 108.9 . . ?
 C97 C96 H96B 108.9 . . ?
 C96 C97 H97A 109.1 . . ?
 C96 C97 H97B 109.1 . . ?
 H97A C97 H97B 107.8 . . ?
 C98 C97 C96 112.5(6) . . ?
 C98 C97 H97A 109.1 . . ?
 C98 C97 H97B 109.1 . . ?
 C97 C98 H98A 109.6 . . ?
 C97 C98 H98B 109.6 . . ?
 C97 C98 C99 110.1(6) . . ?
 H98A C98 H98B 108.1 . . ?
 C99 C98 H98A 109.6 . . ?
 C99 C98 H98B 109.6 . . ?
 N11 C99 C94 114.0(6) . . ?
 N11 C99 C98 112.9(6) . . ?
 N11 C99 H99 106.9 . . ?
 C94 C99 C98 108.7(6) . . ?
 C94 C99 H99 106.9 . . ?
 C98 C99 H99 106.9 . . ?
 O21 C100 N11 120.2(6) . . ?
 O21 C100 C101 123.9(6) . . ?
 N11 C100 C101 115.9(6) . . ?
 C102 C101 C100 118.7(6) . . ?
 C102 C101 C112 120.0(7) . . ?
 C112 C101 C100 121.2(6) . . ?
 C101 C102 H102 119.5 . . ?
 C101 C102 C103 121.0(7) . . ?
 C103 C102 H102 119.5 . . ?
 C102 C103 H103 120.6 . . ?
 C104 C103 C102 118.8(7) . . ?
 C104 C103 H103 120.6 . . ?
 C103 C104 C105 119.2(7) . . ?
 C103 C104 C113 120.9(7) . . ?
 C113 C104 C105 119.8(7) . . ?
 O22 C105 N12 121.6(6) . . ?
 O22 C105 C104 121.1(7) . . ?
 N12 C105 C104 117.3(6) . . ?
 O23 C106 N12 122.2(7) . . ?
 O23 C106 C107 120.0(7) . . ?
 N12 C106 C107 117.8(6) . . ?
 C108 C107 C106 119.8(6) . . ?
 C108 C107 C113 121.6(7) . . ?
 C113 C107 C106 118.5(6) . . ?
 C107 C108 H108 120.7 . . ?
 C107 C108 C109 118.5(7) . . ?
 C109 C108 H108 120.7 . . ?
 C108 C109 H109 119.3 . . ?
 C110 C109 C108 121.4(7) . . ?
 C110 C109 H109 119.3 . . ?
 C109 C110 C111 118.6(6) . . ?
 C112 C110 C109 119.0(7) . . ?
 C112 C110 C111 122.4(7) . . ?
 O24 C111 N11 121.8(7) . . ?
 O24 C111 C110 122.9(7) . . ?
 N11 C111 C110 115.2(6) . . ?
 C101 C112 C113 118.3(7) . . ?
 C110 C112 C101 120.1(7) . . ?
 C110 C112 C113 121.5(7) . . ?
 C104 C113 C107 121.6(7) . . ?
 C104 C113 C112 120.8(7) . . ?
 C112 C113 C107 117.6(6) . . ?
 N12 C114 H114 107.1 . . ?
 N12 C114 C115 111.6(6) . . ?
 N12 C114 C119 114.2(6) . . ?
 C115 C114 H114 107.1 . . ?
 C119 C114 H114 107.1 . . ?
 C119 C114 C115 109.4(6) . . ?
 C114 C115 H11A 109.7 . . ?
 C114 C115 H11B 109.7 . . ?
 C114 C115 C116 109.6(7) . . ?
 H11A C115 H11B 108.2 . . ?
 C116 C115 H11A 109.7 . . ?
 C116 C115 H11B 109.7 . . ?
 C115 C116 H11C 109.5 . . ?
 C115 C116 H11D 109.5 . . ?
 C115 C116 C117 110.5(7) . . ?
 H11C C116 H11D 108.1 . . ?
 C117 C116 H11C 109.5 . . ?
 C117 C116 H11D 109.5 . . ?
 C116 C117 H11E 109.5 . . ?
 C116 C117 H11F 109.5 . . ?
 H11E C117 H11F 108.1 . . ?
 C118 C117 C116 110.6(7) . . ?
 C118 C117 H11E 109.5 . . ?
 C118 C117 H11F 109.5 . . ?
 C117 C118 H11G 109.7 . . ?
 C117 C118 H11H 109.7 . . ?
 H11G C118 H11H 108.2 . . ?
 C119 C118 C117 109.8(7) . . ?
 C119 C118 H11G 109.7 . . ?
 C119 C118 H11H 109.7 . . ?
 N7 C119 C114 116.1(6) . . ?
 N7 C119 C118 112.4(6) . . ?
 N7 C119 H119 106.6 . . ?
 C114 C119 C118 107.8(7) . . ?
 C114 C119 H119 106.6 . . ?
 C118 C119 H119 106.6 . . ?

loop_
  _geom_torsion_atom_site_label_1
  _geom_torsion_atom_site_label_2
  _geom_torsion_atom_site_label_3
  _geom_torsion_atom_site_label_4
  _geom_torsion
  _geom_torsion_site_symmetry_1
  _geom_torsion_site_symmetry_2
  _geom_torsion_site_symmetry_3
  _geom_torsion_site_symmetry_4
  _geom_torsion_publ_flag
 Br1 C121 C122 Br2 -176.5(7) . . . . ?
 Br2A C32A C131 Br11 -13(4) . . . . ?
 Br2A C32A C131 C132 90(3) . . . . ?
 Br11 C131 C132 Br12 32(3) . . . . ?
 C32A C131 C132 Br12 -65(2) . . . . ?
 Br3 C123 C124 Br4 -177.6(9) . . . . ?
 Br5 C125 C126 Br6 174.1(6) . . . . ?
 Br7 C127 C128 Br8 -66.2(10) . . . . ?
 Br9 C129 C130 Br10 178.7(5) . . . . ?
 O1 C1 C2 C3 -0.4(11) . . . . ?
 O1 C1 C2 C13 178.2(7) . . . . ?
 O3 C7 C8 C9 0.6(11) . . . . ?
 O3 C7 C8 C14 -178.7(7) . . . . ?
 O5 C21 C22 C23 -3.8(12) . . . . ?
 O5 C21 C22 C33 171.9(7) . . . . ?
 O7 C27 C28 C29 -5.3(13) . . . . ?
 O7 C27 C28 C34 173.3(8) . . . . ?
 O9 C41 C42 C43 2.2(12) . . . . ?
 O9 C41 C42 C53 -177.9(8) . . . . ?
 O11 C47 C48 C49 1.8(11) . . . . ?
 O11 C47 C48 C54 179.2(7) . . . . ?
 N1 C1 C2 C3 -178.2(7) . . . . ?
 N1 C1 C2 C13 0.4(10) . . . . ?
 N2 C7 C8 C9 -176.5(7) . . . . ?
 N2 C7 C8 C14 4.2(10) . . . . ?
 N2 C15 C16 C17 -174.3(6) . . . . ?
 N2 C15 C20 N3 48.2(8) . . . . ?
 N2 C15 C20 C19 174.3(6) . . . . ?
 N3 C21 C22 C23 177.6(7) . . . . ?
 N3 C21 C22 C33 -6.8(10) . . . . ?
 N4 C27 C28 C29 175.2(8) . . . . ?
 N4 C27 C28 C34 -6.2(11) . . . . ?
 N4 C35 C36 C37 -172.8(6) . . . . ?
 N4 C35 C40 N5 46.7(8) . . . . ?
 N4 C35 C40 C39 169.8(6) . . . . ?
 N5 C41 C42 C43 -177.0(7) . . . . ?
 N5 C41 C42 C53 2.9(11) . . . . ?
 N6 C47 C48 C49 178.6(7) . . . . ?
 N6 C47 C48 C54 -4.0(10) . . . . ?
 N6 C55 C56 C57 -168.0(7) . . . . ?
 N6 C55 C60 N1 40.7(9) . . . . ?
 N6 C55 C60 C59 167.4(6) . . . . ?
 C1 N1 C12 O4 172.2(7) . . . . ?
 C1 N1 C12 C11 -6.6(10) . . . . ?
 C1 N1 C60 C55 51.1(9) . . . . ?
 C1 N1 C60 C59 -74.2(8) . . . . ?
 C1 C2 C3 C4 -179.4(8) . . . . ?
 C1 C2 C13 C11 -5.1(10) . . . . ?
 C1 C2 C13 C14 178.5(6) . . . . ?
 C2 C3 C4 C5 -0.7(14) . . . . ?
 C2 C13 C14 C5 2.5(10) . . . . ?
 C2 C13 C14 C8 175.8(6) . . . . ?
 C3 C2 C13 C11 173.5(7) . . . . ?
 C3 C2 C13 C14 -2.9(11) . . . . ?
 C3 C4 C5 C6 176.6(8) . . . . ?
 C3 C4 C5 C14 0.3(13) . . . . ?
 C4 C5 C6 O2 4.0(13) . . . . ?
 C4 C5 C6 N2 178.9(7) . . . . ?
 C4 C5 C14 C8 -174.5(7) . . . . ?
 C4 C5 C14 C13 -1.2(12) . . . . ?
 C6 N2 C7 O3 -176.9(7) . . . . ?
 C6 N2 C7 C8 0.1(11) . . . . ?
 C6 N2 C15 C16 115.3(7) . . . . ?
 C6 N2 C15 C20 -118.7(7) . . . . ?
 C6 C5 C14 C8 9.3(11) . . . . ?
 C6 C5 C14 C13 -177.5(7) . . . . ?
 C7 N2 C6 O2 175.2(8) . . . . ?
 C7 N2 C6 C5 0.2(11) . . . . ?
 C7 N2 C15 C16 -67.3(8) . . . . ?
 C7 N2 C15 C20 58.7(8) . . . . ?
 C7 C8 C9 C10 -179.1(6) . . . . ?
 C7 C8 C14 C5 -9.0(10) . . . . ?
 C7 C8 C14 C13 177.9(6) . . . . ?
 C8 C9 C10 C11 3.3(11) . . . . ?
 C9 C8 C14 C5 171.7(7) . . . . ?
 C9 C8 C14 C13 -1.5(11) . . . . ?
 C9 C10 C11 C12 178.4(7) . . . . ?
 C9 C10 C11 C13 -5.4(10) . . . . ?
 C10 C11 C12 O4 -0.8(11) . . . . ?
 C10 C11 C12 N1 178.0(6) . . . . ?
 C10 C11 C13 C2 -172.2(7) . . . . ?
 C10 C11 C13 C14 4.1(10) . . . . ?
 C11 C13 C14 C5 -173.9(7) . . . . ?
 C11 C13 C14 C8 -0.6(11) . . . . ?
 C12 N1 C1 O1 -172.3(7) . . . . ?
 C12 N1 C1 C2 5.5(10) . . . . ?
 C12 N1 C60 C55 -136.1(7) . . . . ?
 C12 N1 C60 C59 98.6(8) . . . . ?
 C12 C11 C13 C2 4.1(11) . . . . ?
 C12 C11 C13 C14 -179.6(7) . . . . ?
 C13 C2 C3 C4 2.0(13) . . . . ?
 C13 C11 C12 O4 -177.1(7) . . . . ?
 C13 C11 C12 N1 1.7(10) . . . . ?
 C14 C5 C6 O2 -179.8(8) . . . . ?
 C14 C5 C6 N2 -4.9(11) . . . . ?
 C14 C8 C9 C10 0.2(11) . . . . ?
 C15 N2 C6 O2 -7.6(11) . . . . ?
 C15 N2 C6 C5 177.3(6) . . . . ?
 C15 N2 C7 O3 6.1(11) . . . . ?
 C15 N2 C7 C8 -176.9(6) . . . . ?
 C15 C16 C17 C18 -55.5(9) . . . . ?
 C16 C15 C20 N3 175.0(6) . . . . ?
 C16 C15 C20 C19 -58.9(8) . . . . ?
 C16 C17 C18 C19 56.4(9) . . . . ?
 C17 C18 C19 C20 -57.4(8) . . . . ?
 C18 C19 C20 N3 -174.8(6) . . . . ?
 C18 C19 C20 C15 58.3(8) . . . . ?
 C20 N3 C21 O5 1.9(10) . . . . ?
 C20 N3 C21 C22 -179.4(6) . . . . ?
 C20 N3 C32 O8 6.4(10) . . . . ?
 C20 N3 C32 C31 -173.4(6) . . . . ?
 C20 C15 C16 C17 58.1(8) . . . . ?
 C21 N3 C20 C15 58.4(8) . . . . ?
 C21 N3 C20 C19 -67.3(8) . . . . ?
 C21 N3 C32 O8 -178.2(7) . . . . ?
 C21 N3 C32 C31 2.0(10) . . . . ?
 C21 C22 C23 C24 -178.8(7) . . . . ?
 C21 C22 C33 C31 0.5(11) . . . . ?
 C21 C22 C33 C34 -178.0(7) . . . . ?
 C22 C23 C24 C25 -4.6(11) . . . . ?
 C22 C33 C34 C25 -1.6(10) . . . . ?
 C22 C33 C34 C28 176.7(8) . . . . ?
 C23 C22 C33 C31 176.2(7) . . . . ?
 C23 C22 C33 C34 -2.3(11) . . . . ?
 C23 C24 C25 C26 -179.8(7) . . . . ?
 C23 C24 C25 C34 0.5(11) . . . . ?
 C24 C25 C26 O6 -0.2(12) . . . . ?
 C24 C25 C26 N4 179.3(7) . . . . ?
 C24 C25 C34 C28 -175.9(7) . . . . ?
 C24 C25 C34 C33 2.4(10) . . . . ?
 C26 N4 C27 O7 -169.5(8) . . . . ?
 C26 N4 C27 C28 10.0(11) . . . . ?
 C26 N4 C35 C36 106.2(8) . . . . ?
 C26 N4 C35 C40 -127.1(7) . . . . ?
 C26 C25 C34 C28 4.4(10) . . . . ?
 C26 C25 C34 C33 -177.3(6) . . . . ?
 C27 N4 C26 O6 173.0(7) . . . . ?
 C27 N4 C26 C25 -6.5(11) . . . . ?
 C27 N4 C35 C36 -69.4(9) . . . . ?
 C27 N4 C35 C40 57.4(8) . . . . ?
 C27 C28 C29 C30 -179.0(8) . . . . ?
 C27 C28 C34 C25 -0.7(11) . . . . ?
 C27 C28 C34 C33 -178.9(7) . . . . ?
 C28 C29 C30 C31 -2.3(14) . . . . ?
 C29 C28 C34 C25 177.9(8) . . . . ?
 C29 C28 C34 C33 -0.3(12) . . . . ?
 C29 C30 C31 C32 176.0(8) . . . . ?
 C29 C30 C31 C33 0.1(13) . . . . ?
 C30 C31 C32 O8 -4.1(12) . . . . ?
 C30 C31 C32 N3 175.6(7) . . . . ?
 C30 C31 C33 C22 -176.8(7) . . . . ?
 C30 C31 C33 C34 1.8(10) . . . . ?
 C31 C33 C34 C25 179.9(6) . . . . ?
 C31 C33 C34 C28 -1.8(10) . . . . ?
 C32 N3 C20 C15 -126.1(7) . . . . ?
 C32 N3 C20 C19 108.3(7) . . . . ?
 C32 N3 C21 O5 -173.3(7) . . . . ?
 C32 N3 C21 C22 5.4(10) . . . . ?
 C32 C31 C33 C22 7.3(10) . . . . ?
 C32 C31 C33 C34 -174.1(7) . . . . ?
 C33 C22 C23 C24 5.4(11) . . . . ?
 C33 C31 C32 O8 171.7(7) . . . . ?
 C33 C31 C32 N3 -8.5(10) . . . . ?
 C34 C25 C26 O6 179.5(7) . . . . ?
 C34 C25 C26 N4 -1.0(11) . . . . ?
 C34 C28 C29 C30 2.4(13) . . . . ?
 C35 N4 C26 O6 -2.3(11) . . . . ?
 C35 N4 C26 C25 178.2(6) . . . . ?
 C35 N4 C27 O7 5.8(11) . . . . ?
 C35 N4 C27 C28 -174.7(6) . . . . ?
 C35 C36 C37 C38 -56.0(9) . . . . ?
 C36 C35 C40 N5 175.5(6) . . . . ?
 C36 C35 C40 C39 -61.4(8) . . . . ?
 C36 C37 C38 C39 56.1(9) . . . . ?
 C37 C38 C39 C40 -58.7(10) . . . . ?
 C38 C39 C40 N5 -175.6(7) . . . . ?
 C38 C39 C40 C35 59.6(9) . . . . ?
 C40 N5 C41 O9 -2.2(11) . . . . ?
 C40 N5 C41 C42 177.0(6) . . . . ?
 C40 N5 C52 O12 2.5(13) . . . . ?
 C40 N5 C52 C51 179.5(7) . . . . ?
 C40 C35 C36 C37 59.0(8) . . . . ?
 C41 N5 C40 C35 58.5(9) . . . . ?
 C41 N5 C40 C39 -63.7(9) . . . . ?
 C41 N5 C52 O12 175.6(10) . . . . ?
 C41 N5 C52 C51 -7.4(12) . . . . ?
 C41 C42 C43 C44 -179.0(7) . . . . ?
 C41 C42 C53 C51 -7.0(10) . . . . ?
 C41 C42 C53 C54 -178.9(7) . . . . ?
 C42 C43 C44 C45 1.9(12) . . . . ?
 C42 C53 C54 C45 -5.8(10) . . . . ?
 C42 C53 C54 C48 177.9(7) . . . . ?
 C43 C42 C53 C51 172.9(7) . . . . ?
 C43 C42 C53 C54 1.0(10) . . . . ?
 C43 C44 C45 C46 -179.5(8) . . . . ?
 C43 C44 C45 C54 -6.8(12) . . . . ?
 C44 C45 C46 O10 -1.1(12) . . . . ?
 C44 C45 C46 N6 -177.1(7) . . . . ?
 C44 C45 C54 C48 -175.1(7) . . . . ?
 C44 C45 C54 C53 8.7(11) . . . . ?
 C46 N6 C47 O11 -170.6(7) . . . . ?
 C46 N6 C47 C48 12.5(10) . . . . ?
 C46 N6 C55 C56 101.7(8) . . . . ?
 C46 N6 C55 C60 -134.1(7) . . . . ?
 C46 C45 C54 C48 -2.3(11) . . . . ?
 C46 C45 C54 C53 -178.6(7) . . . . ?
 C47 N6 C46 O10 168.0(7) . . . . ?
 C47 N6 C46 C45 -15.8(10) . . . . ?
 C47 N6 C55 C56 -69.0(9) . . . . ?
 C47 N6 C55 C60 55.2(9) . . . . ?
 C47 C48 C49 C50 -178.7(7) . . . . ?
 C47 C48 C54 C45 -0.7(11) . . . . ?
 C47 C48 C54 C53 175.5(6) . . . . ?
 C48 C49 C50 C51 0.6(13) . . . . ?
 C49 C48 C54 C45 176.6(7) . . . . ?
 C49 C48 C54 C53 -7.2(10) . . . . ?
 C49 C50 C51 C52 -179.2(8) . . . . ?
 C49 C50 C51 C53 -1.8(13) . . . . ?
 C50 C51 C52 O12 -2.6(15) . . . . ?
 C50 C51 C52 N5 -179.5(8) . . . . ?
 C50 C51 C53 C42 -173.5(8) . . . . ?
 C50 C51 C53 C54 -1.4(11) . . . . ?
 C51 C53 C54 C45 -177.8(7) . . . . ?
 C51 C53 C54 C48 5.9(10) . . . . ?
 C52 N5 C40 C35 -128.4(7) . . . . ?
 C52 N5 C40 C39 109.4(8) . . . . ?
 C52 N5 C41 O9 -174.7(8) . . . . ?
 C52 N5 C41 C42 4.5(11) . . . . ?
 C52 C51 C53 C42 3.9(10) . . . . ?
 C52 C51 C53 C54 176.0(7) . . . . ?
 C53 C42 C43 C44 1.1(11) . . . . ?
 C53 C51 C52 O12 -180.0(10) . . . . ?
 C53 C51 C52 N5 3.1(11) . . . . ?
 C54 C45 C46 O10 -173.8(7) . . . . ?
 C54 C45 C46 N6 10.2(11) . . . . ?
 C54 C48 C49 C50 3.9(12) . . . . ?
 C55 N6 C46 O10 -2.3(10) . . . . ?
 C55 N6 C46 C45 173.9(7) . . . . ?
 C55 N6 C47 O11 -0.5(11) . . . . ?
 C55 N6 C47 C48 -177.4(6) . . . . ?
 C55 C56 C57 C58 -57.2(9) . . . . ?
 C56 C55 C60 N1 169.2(6) . . . . ?
 C56 C55 C60 C59 -64.1(8) . . . . ?
 C56 C57 C58 C59 51.1(10) . . . . ?
 C57 C58 C59 C60 -52.1(10) . . . . ?
 C58 C59 C60 N1 -172.2(7) . . . . ?
 C58 C59 C60 C55 59.6(9) . . . . ?
 C60 N1 C1 O1 0.0(10) . . . . ?
 C60 N1 C1 C2 177.8(6) . . . . ?
 C60 N1 C12 O4 -0.4(10) . . . . ?
 C60 N1 C12 C11 -179.2(6) . . . . ?
 C60 C55 C56 C57 64.0(9) . . . . ?
 O13 C61 C62 C63 -2.8(14) . . . . ?
 O13 C61 C62 C73 -177.7(9) . . . . ?
 O15 C67 C68 C69 2.0(13) . . . . ?
 O15 C67 C68 C74 -175.7(8) . . . . ?
 O17 C81 C82 C83 -3.5(12) . . . . ?
 O17 C81 C82 C92 -178.0(8) . . . . ?
 O19 C87 C88 C89 -4.2(11) . . . . ?
 O19 C87 C88 C93 -178.9(7) . . . . ?
 O20 C01V C91 C90 5.0(12) . . . . ?
 O20 C01V C91 C92 -178.6(7) . . . . ?
 O21 C100 C101 C102 5.0(10) . . . . ?
 O21 C100 C101 C112 -173.2(7) . . . . ?
 O23 C106 C107 C108 2.0(12) . . . . ?
 O23 C106 C107 C113 -174.3(8) . . . . ?
 N7 C61 C62 C63 178.2(8) . . . . ?
 N7 C61 C62 C73 3.3(12) . . . . ?
 N8 C67 C68 C69 179.2(7) . . . . ?
 N8 C67 C68 C74 1.6(12) . . . . ?
 N8 C75 C76 C77 -173.9(6) . . . . ?
 N8 C75 C80 N9 45.3(8) . . . . ?
 N8 C75 C80 C79 171.6(6) . . . . ?
 N9 C01V C91 C90 -177.5(7) . . . . ?
 N9 C01V C91 C92 -1.1(10) . . . . ?
 N9 C81 C82 C83 177.6(7) . . . . ?
 N9 C81 C82 C92 3.1(11) . . . . ?
 N10 C87 C88 C89 179.3(7) . . . . ?
 N10 C87 C88 C93 4.6(10) . . . . ?
 N10 C94 C95 C96 -171.8(6) . . . . ?
 N10 C94 C99 N11 43.5(9) . . . . ?
 N10 C94 C99 C98 170.4(6) . . . . ?
 N11 C100 C101 C102 -175.3(6) . . . . ?
 N11 C100 C101 C112 6.6(9) . . . . ?
 N12 C106 C107 C108 -176.8(6) . . . . ?
 N12 C106 C107 C113 7.0(10) . . . . ?
 N12 C114 C115 C116 -171.6(7) . . . . ?
 N12 C114 C119 N7 41.5(9) . . . . ?
 N12 C114 C119 C118 168.6(7) . . . . ?
 C01V N9 C80 C75 63.4(8) . . . . ?
 C01V N9 C80 C79 -62.1(9) . . . . ?
 C01V N9 C81 O17 175.8(7) . . . . ?
 C01V N9 C81 C82 -5.2(10) . . . . ?
 C01V C91 C92 C82 -0.7(11) . . . . ?
 C01V C91 C92 C93 179.9(6) . . . . ?
 C61 N7 C72 O16 -175.6(8) . . . . ?
 C61 N7 C72 C71 4.4(11) . . . . ?
 C61 N7 C119 C114 -133.9(7) . . . . ?
 C61 N7 C119 C118 101.2(8) . . . . ?
 C61 C62 C63 C64 -177.2(8) . . . . ?
 C61 C62 C73 C71 -1.7(12) . . . . ?
 C61 C62 C73 C74 -179.8(7) . . . . ?
 C62 C63 C64 C65 -0.4(14) . . . . ?
 C62 C73 C74 C65 -5.6(11) . . . . ?
 C62 C73 C74 C68 -177.9(7) . . . . ?
 C63 C62 C73 C71 -176.8(7) . . . . ?
 C63 C62 C73 C74 5.1(12) . . . . ?
 C63 C64 C65 C66 -176.9(8) . . . . ?
 C63 C64 C65 C74 0.0(12) . . . . ?
 C64 C65 C66 O14 0.6(12) . . . . ?
 C64 C65 C66 N8 -179.9(7) . . . . ?
 C64 C65 C74 C68 175.4(7) . . . . ?
 C64 C65 C74 C73 3.0(11) . . . . ?
 C66 N8 C67 O15 170.7(8) . . . . ?
 C66 N8 C67 C68 -6.5(12) . . . . ?
 C66 N8 C75 C76 -67.0(9) . . . . ?
 C66 N8 C75 C80 59.5(9) . . . . ?
 C66 C65 C74 C68 -7.7(11) . . . . ?
 C66 C65 C74 C73 179.9(7) . . . . ?
 C67 N8 C66 O14 -176.4(8) . . . . ?
 C67 N8 C66 C65 4.2(11) . . . . ?
 C67 N8 C75 C76 113.6(7) . . . . ?
 C67 N8 C75 C80 -119.9(7) . . . . ?
 C67 C68 C69 C70 -179.7(8) . . . . ?
 C67 C68 C74 C65 5.2(11) . . . . ?
 C67 C68 C74 C73 177.7(7) . . . . ?
 C68 C69 C70 C71 0.0(11) . . . . ?
 C69 C68 C74 C65 -172.5(7) . . . . ?
 C69 C68 C74 C73 -0.1(11) . . . . ?
 C69 C70 C71 C72 178.7(7) . . . . ?
 C69 C70 C71 C73 4.1(11) . . . . ?
 C70 C71 C72 O16 2.9(11) . . . . ?
 C70 C71 C72 N7 -177.1(7) . . . . ?
 C70 C71 C73 C62 175.8(7) . . . . ?
 C70 C71 C73 C74 -6.1(11) . . . . ?
 C71 C73 C74 C65 176.3(7) . . . . ?
 C71 C73 C74 C68 4.0(11) . . . . ?
 C72 N7 C61 O13 176.1(9) . . . . ?
 C72 N7 C61 C62 -4.9(11) . . . . ?
 C72 N7 C119 C114 53.4(9) . . . . ?
 C72 N7 C119 C118 -71.4(9) . . . . ?
 C72 C71 C73 C62 1.2(11) . . . . ?
 C72 C71 C73 C74 179.3(6) . . . . ?
 C73 C62 C63 C64 -2.1(13) . . . . ?
 C73 C71 C72 O16 177.7(7) . . . . ?
 C73 C71 C72 N7 -2.4(10) . . . . ?
 C74 C65 C66 O14 -176.3(7) . . . . ?
 C74 C65 C66 N8 3.2(11) . . . . ?
 C74 C68 C69 C70 -2.0(11) . . . . ?
 C75 N8 C66 O14 4.3(11) . . . . ?
 C75 N8 C66 C65 -175.2(7) . . . . ?
 C75 N8 C67 O15 -9.9(11) . . . . ?
 C75 N8 C67 C68 172.8(7) . . . . ?
 C75 C76 C77 C78 -56.8(8) . . . . ?
 C76 C75 C80 N9 171.4(6) . . . . ?
 C76 C75 C80 C79 -62.2(8) . . . . ?
 C76 C77 C78 C79 58.8(9) . . . . ?
 C77 C78 C79 C80 -59.4(9) . . . . ?
 C78 C79 C80 N9 -173.9(7) . . . . ?
 C78 C79 C80 C75 58.9(9) . . . . ?
 C80 N9 C01V O20 -5.1(11) . . . . ?
 C80 N9 C01V C91 177.6(6) . . . . ?
 C80 N9 C81 O17 2.3(10) . . . . ?
 C80 N9 C81 C82 -178.8(6) . . . . ?
 C80 C75 C76 C77 58.7(8) . . . . ?
 C81 N9 C01V O20 -178.4(7) . . . . ?
 C81 N9 C01V C91 4.3(10) . . . . ?
 C81 N9 C80 C75 -122.6(6) . . . . ?
 C81 N9 C80 C79 111.9(7) . . . . ?
 C81 C82 C83 C84 -178.4(8) . . . . ?
 C81 C82 C92 C91 -0.3(12) . . . . ?
 C81 C82 C92 C93 179.1(7) . . . . ?
 C82 C83 C84 C85 -2.1(14) . . . . ?
 C82 C92 C93 C85 0.2(10) . . . . ?
 C82 C92 C93 C88 179.1(7) . . . . ?
 C83 C82 C92 C91 -174.7(8) . . . . ?
 C83 C82 C92 C93 4.8(12) . . . . ?
 C83 C84 C85 C86 -178.1(8) . . . . ?
 C83 C84 C85 C93 6.9(13) . . . . ?
 C84 C85 C86 O18 2.7(12) . . . . ?
 C84 C85 C86 N10 178.9(7) . . . . ?
 C84 C85 C93 C88 175.3(8) . . . . ?
 C84 C85 C93 C92 -5.9(11) . . . . ?
 C86 N10 C87 O19 172.3(7) . . . . ?
 C86 N10 C87 C88 -11.1(10) . . . . ?
 C86 N10 C94 C95 -71.6(8) . . . . ?
 C86 N10 C94 C99 52.6(9) . . . . ?
 C86 C85 C93 C88 0.3(11) . . . . ?
 C86 C85 C93 C92 179.1(6) . . . . ?
 C87 N10 C86 O18 -172.1(7) . . . . ?
 C87 N10 C86 C85 11.8(10) . . . . ?
 C87 N10 C94 C95 98.1(7) . . . . ?
 C87 N10 C94 C99 -137.6(7) . . . . ?
 C87 C88 C89 C90 178.0(7) . . . . ?
 C87 C88 C93 C85 0.5(11) . . . . ?
 C87 C88 C93 C92 -178.3(6) . . . . ?
 C88 C89 C90 C91 2.0(12) . . . . ?
 C89 C88 C93 C85 -174.0(7) . . . . ?
 C89 C88 C93 C92 7.1(11) . . . . ?
 C89 C90 C91 C01V 179.9(7) . . . . ?
 C89 C90 C91 C92 3.5(12) . . . . ?
 C90 C91 C92 C82 175.8(8) . . . . ?
 C90 C91 C92 C93 -3.6(11) . . . . ?
 C91 C92 C93 C85 179.6(7) . . . . ?
 C91 C92 C93 C88 -1.5(10) . . . . ?
 C92 C82 C83 C84 -3.9(13) . . . . ?
 C93 C85 C86 O18 177.6(7) . . . . ?
 C93 C85 C86 N10 -6.3(10) . . . . ?
 C93 C88 C89 C90 -7.4(11) . . . . ?
 C94 N10 C86 O18 -3.1(12) . . . . ?
 C94 N10 C86 C85 -179.2(6) . . . . ?
 C94 N10 C87 O19 2.7(10) . . . . ?
 C94 N10 C87 C88 179.3(6) . . . . ?
 C94 C95 C96 C97 -54.7(9) . . . . ?
 C95 C94 C99 N11 168.8(6) . . . . ?
 C95 C94 C99 C98 -64.3(7) . . . . ?
 C95 C96 C97 C98 52.9(9) . . . . ?
 C96 C97 C98 C99 -53.7(8) . . . . ?
 C97 C98 C99 N11 -172.3(6) . . . . ?
 C97 C98 C99 C94 60.2(8) . . . . ?
 C99 N11 C100 O21 -4.2(9) . . . . ?
 C99 N11 C100 C101 176.1(6) . . . . ?
 C99 N11 C111 O24 -3.5(11) . . . . ?
 C99 N11 C111 C110 179.4(6) . . . . ?
 C99 C94 C95 C96 60.9(8) . . . . ?
 C100 N11 C99 C94 -128.0(6) . . . . ?
 C100 N11 C99 C98 107.4(7) . . . . ?
 C100 N11 C111 O24 -177.7(7) . . . . ?
 C100 N11 C111 C110 5.2(10) . . . . ?
 C100 C101 C102 C103 179.8(6) . . . . ?
 C100 C101 C112 C110 0.6(11) . . . . ?
 C100 C101 C112 C113 179.0(6) . . . . ?
 C101 C102 C103 C104 -0.3(11) . . . . ?
 C101 C112 C113 C104 2.7(10) . . . . ?
 C101 C112 C113 C107 -176.1(6) . . . . ?
 C102 C101 C112 C110 -177.5(7) . . . . ?
 C102 C101 C112 C113 0.8(10) . . . . ?
 C102 C103 C104 C105 -179.3(7) . . . . ?
 C102 C103 C104 C113 3.9(11) . . . . ?
 C103 C104 C105 O22 2.8(11) . . . . ?
 C103 C104 C105 N12 -177.4(7) . . . . ?
 C103 C104 C113 C107 173.5(7) . . . . ?
 C103 C104 C113 C112 -5.2(11) . . . . ?
 C105 N12 C106 O23 169.9(8) . . . . ?
 C105 N12 C106 C107 -11.4(11) . . . . ?
 C105 N12 C114 C115 -70.9(8) . . . . ?
 C105 N12 C114 C119 53.9(9) . . . . ?
 C105 C104 C113 C107 -3.2(10) . . . . ?
 C105 C104 C113 C112 178.0(7) . . . . ?
 C106 N12 C105 O22 -172.0(7) . . . . ?
 C106 N12 C105 C104 8.1(10) . . . . ?
 C106 N12 C114 C115 106.1(8) . . . . ?
 C106 N12 C114 C119 -129.2(7) . . . . ?
 C106 C107 C108 C109 179.3(7) . . . . ?
 C106 C107 C113 C104 0.0(10) . . . . ?
 C106 C107 C113 C112 178.8(7) . . . . ?
 C107 C108 C109 C110 2.0(11) . . . . ?
 C108 C107 C113 C104 -176.2(7) . . . . ?
 C108 C107 C113 C112 2.6(10) . . . . ?
 C108 C109 C110 C111 -178.2(7) . . . . ?
 C108 C109 C110 C112 2.7(11) . . . . ?
 C109 C110 C111 O24 6.6(11) . . . . ?
 C109 C110 C111 N11 -176.3(6) . . . . ?
 C109 C110 C112 C101 173.5(7) . . . . ?
 C109 C110 C112 C113 -4.8(11) . . . . ?
 C110 C112 C113 C104 -179.0(7) . . . . ?
 C110 C112 C113 C107 2.2(11) . . . . ?
 C111 N11 C99 C94 57.4(8) . . . . ?
 C111 N11 C99 C98 -67.2(8) . . . . ?
 C111 N11 C100 O21 170.1(7) . . . . ?
 C111 N11 C100 C101 -9.7(9) . . . . ?
 C111 C110 C112 C101 -5.6(11) . . . . ?
 C111 C110 C112 C113 176.2(7) . . . . ?
 C112 C101 C102 C103 -2.1(11) . . . . ?
 C112 C110 C111 O24 -174.3(7) . . . . ?
 C112 C110 C111 N11 2.8(10) . . . . ?
 C113 C104 C105 O22 179.6(7) . . . . ?
 C113 C104 C105 N12 -0.5(10) . . . . ?
 C113 C107 C108 C109 -4.6(11) . . . . ?
 C114 N12 C105 O22 4.6(11) . . . . ?
 C114 N12 C105 C104 -175.2(6) . . . . ?
 C114 N12 C106 O23 -6.9(11) . . . . ?
 C114 N12 C106 C107 171.8(6) . . . . ?
 C114 C115 C116 C117 -54.2(10) . . . . ?
 C115 C114 C119 N7 167.3(7) . . . . ?
 C115 C114 C119 C118 -65.5(9) . . . . ?
 C115 C116 C117 C118 53.0(10) . . . . ?
 C116 C117 C118 C119 -58.0(10) . . . . ?
 C117 C118 C119 N7 -166.8(7) . . . . ?
 C117 C118 C119 C114 63.9(9) . . . . ?
 C119 N7 C61 O13 4.2(12) . . . . ?
 C119 N7 C61 C62 -176.8(7) . . . . ?
 C119 N7 C72 O16 -3.8(11) . . . . ?
 C119 N7 C72 C71 176.2(6) . . . . ?
 C119 C114 C115 C116 61.1(9) . . . . ?

_smtbx_masks_special_details
;
Total solvent accessible volume / cell = 527.9 Ang^3^ [15.3%]
Total electron count / cell = 38.0

The solvent masking procedure as implemented in Olex2 was used to remove the
electronic contribution of solvent molecules from the refinement.  As the exact
solvent content is not known, only the atoms used in the refinement model are
reported in the formula here.
;
loop_
  _smtbx_masks_void_nr
  _smtbx_masks_void_average_x
  _smtbx_masks_void_average_y
  _smtbx_masks_void_average_z
  _smtbx_masks_void_volume
  _smtbx_masks_void_count_electrons
  _smtbx_masks_void_content
 1 0.209 0.437 0.651 527.9 44.8 ?

# end Validation Reply Form
_shelx_estimated_absorpt_T_max    0.782
_shelx_estimated_absorpt_T_min    0.554
_shelx_hkl_checksum               61620
_shelx_hkl_file
;
 -17   1   7    1.90    0.18
 -17   1   8    0.18    0.15
 -17   1   9    1.26    0.26
 -17   2   5    0.53    0.16
 -17   2   6    0.79    0.19
 -17   2   7    3.82    0.39
 -17   2   8    1.85    0.21
 -17   3   3    1.42    0.24
 -17   3   4    1.11    0.20
 -17   3   5    5.81    0.35
 -17   3   6    2.26    0.26
 -17   3   7    0.52    0.23
 -17   3   8    1.77    0.30
 -17   4   1    2.60    0.19
 -17   4   2    0.44    0.29
 -17   4   3    5.11    0.39
 -17   4   4    2.37    0.31
 -17   4   5    0.32    0.20
 -17   4   6    1.03    0.19
 -17   4   7    1.19    0.14
 -17   5   0    0.11    0.18
 -17   5   1    0.27    0.18
 -17   5   2    3.08    0.46
 -17   5   3    0.73    0.20
 -17   5   4    0.58    0.17
 -17   5   5    2.44    0.31
 -17   5   6    1.23    0.20
 -17   6  -2    1.49    0.17
 -17   6  -1    0.75    0.23
 -17   6   0    0.35    0.19
 -17   6   1    1.68    0.22
 -17   6   2    0.03    0.20
 -17   6   3    1.96    0.25
 -17   6   4    4.15    0.33
 -17   6   5    0.95    0.22
 -17   7  -2    0.84    0.20
 -17   7  -1    1.87    0.20
 -17   7   0    0.12    0.15
 -17   7   1    1.26    0.18
 -17   7   2    0.50    0.24
 -17   7   3    2.33    0.24
 -17   8  -1    0.31    0.16
 -17   8   0    1.73    0.18
 -17   8   1    0.19    0.17
 -16  -1   9    8.32    0.35
 -16  -1  10    5.68    0.40
 -16  -1  11    1.46    0.20
 -16   0   7    9.91    0.68
 -16   0   8    3.83    0.36
 -16   0   9    1.39    0.19
 -16   0  10    2.97    0.25
 -16   0  11    0.86    0.17
 -16   1   5    0.71    0.35
 -16   1   6    0.50    0.30
 -16   1   7    1.58    0.25
 -16   1   8    3.52    0.30
 -16   1   9    0.71    0.19
 -16   1  10    1.77    0.30
 -16   2   3    0.36    0.19
 -16   2   4    0.25    0.17
 -16   2   5    3.21    0.19
 -16   2   6    1.95    0.23
 -16   2   7    0.80    0.23
 -16   2   8    1.17    0.25
 -16   2   9    2.73    0.33
 -16   2  10    0.91    0.21
 -16   3   1    0.94    0.23
 -16   3   2    2.46    0.33
 -16   3   3    1.21    0.39
 -16   3   4    6.58    0.49
 -16   3   5    2.70    0.47
 -16   3   6    1.68    0.19
 -16   3   7    2.09    0.25
 -16   3   8    3.82    0.30
 -16   3   9    3.23    0.28
 -16   4   0    0.66    0.27
 -16   4   1    1.41    0.32
 -16   4   2    0.74    0.30
 -16   4   3   10.27    0.67
 -16   4   4    0.80    0.18
 -16   4   5    0.58    0.28
 -16   4   6    1.44    0.30
 -16   4   7    2.13    0.20
 -16   4   8    3.50    0.25
 -16   5  -2    0.26    0.17
 -16   5  -1    1.07    0.25
 -16   5   0    1.56    0.23
 -16   5   1    2.95    0.36
 -16   5   2    6.16    0.39
 -16   5   3    0.93    0.24
 -16   5   4    6.02    0.37
 -16   5   5    1.72    0.19
 -16   5   6    0.18    0.17
 -16   5   7    2.24    0.29
 -16   5   8    0.51    0.17
 -16   6  -3    4.84    0.39
 -16   6  -2    0.24    0.21
 -16   6  -1    0.02    0.21
 -16   6   0    5.61    0.58
 -16   6   1    2.32    0.27
 -16   6   2    0.92    0.38
 -16   6   3    2.07    0.19
 -16   6   4    0.32    0.23
 -16   6   5    3.15    0.23
 -16   6   6    0.00    0.14
 -16   7  -5    0.76    0.15
 -16   7  -4    0.11    0.16
 -16   7  -3    0.92    0.22
 -16   7  -2    7.52    0.56
 -16   7  -1    0.61    0.25
 -16   7   0    5.34    0.33
 -16   7   1    4.47    0.36
 -16   7   2    0.15    0.20
 -16   7   3    0.84    0.28
 -16   7   4    0.33    0.15
 -16   7   5    0.11    0.15
 -16   8  -5    1.20    0.20
 -16   8  -4    2.08    0.25
 -16   8  -3    2.82    0.26
 -16   8  -2    0.93    0.20
 -16   8  -1    0.69    0.18
 -16   8   0    2.14    0.19
 -16   8   1    3.48    0.28
 -16   8   2    0.50    0.17
 -16   8   3    1.76    0.18
 -16   8   4    4.13    0.35
 -16   9  -5    1.88    0.19
 -16   9  -4    0.88    0.18
 -16   9  -3    2.61    0.28
 -16   9  -2    1.19    0.23
 -16   9  -1    4.72    0.36
 -16   9   0    2.19    0.33
 -16   9   1    0.77    0.21
 -16   9   2    2.98    0.23
 -16  10  -3    0.36    0.16
 -16  10  -2    1.83    0.23
 -16  10  -1   13.11    0.60
 -16  10   0    2.34    0.26
 -15  -3  13    4.08    0.29
 -15  -2  10    1.66    0.21
 -15  -2  11   12.95    0.67
 -15  -2  12    0.50    0.14
 -15  -2  13    3.31    0.26
 -15  -1   8    2.94    0.49
 -15  -1   9   16.47    0.71
 -15  -1  10    1.51    0.29
 -15  -1  11    6.67    0.35
 -15  -1  12    7.45    0.30
 -15   0   6    1.33    0.30
 -15   0   7    1.66    0.45
 -15   0   8   13.99    0.99
 -15   0   9   22.92    1.25
 -15   0  10    0.91    0.25
 -15   0  11    0.27    0.22
 -15   0  12    2.41    0.31
 -15   1   4    0.28    0.17
 -15   1   5    0.62    0.26
 -15   1   6    4.17    0.34
 -15   1   7    6.63    0.48
 -15   1   8    4.51    0.28
 -15   1   9    0.21    0.35
 -15   1  10   19.98    0.89
 -15   1  11    5.75    0.27
 -15   2   2    3.03    0.35
 -15   2   3    7.11    0.61
 -15   2   4    5.45    0.55
 -15   2   5    0.21    0.21
 -15   2   6    2.21    0.28
 -15   2   7    2.54    0.24
 -15   2   8    7.63    0.52
 -15   2   9    1.39    0.33
 -15   2  10    1.38    0.22
 -15   2  11    3.64    0.38
 -15   3   0    5.61    0.37
 -15   3   1    1.14    0.21
 -15   3   2    1.45    0.28
 -15   3   3    0.49    0.19
 -15   3   4    4.02    0.28
 -15   3   5    1.66    0.50
 -15   3   6    0.20    0.20
 -15   3   7    8.27    0.66
 -15   3   8   10.15    0.42
 -15   3   9    1.95    0.34
 -15   3  10    2.41    0.29
 -15   4  -2    2.76    0.24
 -15   4  -1    3.95    0.42
 -15   4   0    1.95    0.32
 -15   4   1    0.78    0.24
 -15   4   2    0.68    0.24
 -15   4   3    1.38    0.34
 -15   4   4    0.29    0.20
 -15   4   5    0.07    0.35
 -15   4   6   23.40    1.28
 -15   4   7    3.11    0.24
 -15   4   8    1.27    0.34
 -15   4   9    1.63    0.23
 -15   4  10    2.73    0.24
 -15   5  -3    1.58    0.41
 -15   5  -2    2.53    0.32
 -15   5  -1    6.83    0.37
 -15   5   0   14.30    0.84
 -15   5   1    6.56    0.54
 -15   5   2    1.04    0.23
 -15   5   3    7.64    0.75
 -15   5   4    2.18    0.34
 -15   5   5    7.61    0.54
 -15   5   6    7.11    0.40
 -15   5   7    1.14    0.26
 -15   5   8    3.63    0.32
 -15   5   9    5.54    0.38
 -15   6  -5    2.56    0.31
 -15   6  -4    0.84    0.22
 -15   6  -3    2.17    0.39
 -15   6  -2    0.29    0.23
 -15   6  -1    8.78    0.65
 -15   6   0    6.00    0.40
 -15   6   1    0.14    0.24
 -15   6   2    0.18    0.21
 -15   6   3    1.33    0.41
 -15   6   4    4.51    0.34
 -15   6   5    1.03    0.36
 -15   6   6    7.53    0.50
 -15   6   7    1.34    0.21
 -15   6   8    2.40    0.26
 -15   7  -6    3.30    0.35
 -15   7  -5    2.58    0.29
 -15   7  -4    0.11    0.24
 -15   7  -3    2.37    0.48
 -15   7  -2   14.12    0.98
 -15   7  -1    1.18    0.21
 -15   7   0    5.97    0.42
 -15   7   1    1.14    0.20
 -15   7   2    4.36    0.53
 -15   7   3    0.28    0.22
 -15   7   4    1.01    0.28
 -15   7   5    2.38    0.27
 -15   7   6    1.70    0.18
 -15   7   7    1.16    0.21
 -15   8  -7    0.05    0.16
 -15   8  -6    2.91    0.21
 -15   8  -5    1.86    0.26
 -15   8  -4    4.44    0.49
 -15   8  -3    3.03    0.23
 -15   8  -2    0.23    0.27
 -15   8  -1    0.30    0.26
 -15   8   0    0.58    0.27
 -15   8   1    0.02    0.21
 -15   8   2    6.63    0.36
 -15   8   3    1.19    0.22
 -15   8   4    1.09    0.29
 -15   8   5    1.06    0.20
 -15   8   6    2.37    0.24
 -15   9  -7    3.18    0.33
 -15   9  -6    1.33    0.11
 -15   9  -5    4.66    0.33
 -15   9  -4    2.51    0.20
 -15   9  -3    3.22    0.22
 -15   9  -2    0.43    0.20
 -15   9  -1    4.01    0.41
 -15   9   0    0.38    0.24
 -15   9   1    0.62    0.22
 -15   9   2    1.00    0.16
 -15   9   3    2.94    0.23
 -15   9   4    1.21    0.21
 -15  10  -7    2.21    0.22
 -15  10  -6    0.19    0.11
 -15  10  -5    0.22    0.20
 -15  10  -4    1.05    0.10
 -15  10  -3    0.76    0.17
 -15  10  -2    1.02    0.19
 -15  10  -1    0.06    0.20
 -15  10   0    1.06    0.18
 -15  10   1    0.80    0.16
 -15  10   2    3.06    0.34
 -15  10   3    4.93    0.41
 -15  11  -5    2.44    0.17
 -15  11  -4    2.20    0.30
 -15  11  -3    1.70    0.15
 -15  11  -2    1.18    0.22
 -15  11  -1    0.07    0.15
 -15  11   0    0.34    0.15
 -15  11   1    2.49    0.21
 -14  -4  -4    3.08    0.28
 -14  -4  13    1.52    0.21
 -14  -4  14    4.41    0.30
 -14  -3  -5    2.01    0.24
 -14  -3  10    9.04    0.79
 -14  -3  11    1.72    0.37
 -14  -3  12    2.08    0.33
 -14  -3  13    1.43    0.23
 -14  -3  14    0.50    0.15
 -14  -2  -6    0.30    0.14
 -14  -2   8    9.58    0.47
 -14  -2   9    7.73    0.33
 -14  -2  10    0.61    0.38
 -14  -2  11    5.93    0.63
 -14  -2  12    2.25    0.21
 -14  -2  13    0.66    0.16
 -14  -2  14    0.81    0.20
 -14  -1   7    2.40    0.26
 -14  -1   8    6.81    0.61
 -14  -1   9   12.93    1.11
 -14  -1  10    0.76    0.36
 -14  -1  11    2.11    0.36
 -14  -1  12    2.78    0.39
 -14  -1  13    2.72    0.26
 -14   0   5   23.63    0.97
 -14   0   6    8.75    0.96
 -14   0   7   10.75    0.37
 -14   0   8    3.54    0.49
 -14   0   9   15.27    0.44
 -14   0  10    7.65    0.57
 -14   0  11    1.46    0.27
 -14   0  12    0.25    0.17
 -14   0  13    5.58    0.40
 -14   1   3    0.85    0.23
 -14   1   4   43.78    1.70
 -14   1   5   27.63    1.27
 -14   1   6    6.07    0.61
 -14   1   7   23.57    1.29
 -14   1   8    4.34    0.31
 -14   1   9    2.11    0.48
 -14   1  10    0.07    0.23
 -14   1  11    7.35    0.53
 -14   1  12    1.03    0.21
 -14   2   1   49.68    2.02
 -14   2   2   21.44    1.20
 -14   2   3   16.32    1.49
 -14   2   4   27.41    1.40
 -14   2   5   17.74    0.80
 -14   2   6    7.21    0.53
 -14   2   7    9.40    0.53
 -14   2   8    9.47    0.52
 -14   2   9    0.23    0.31
 -14   2  10    1.01    0.19
 -14   2  11    3.11    0.28
 -14   2  12    0.34    0.16
 -14   3  -1   37.45    1.52
 -14   3   0    5.92    0.78
 -14   3   1   25.81    1.56
 -14   3   2   32.17    1.04
 -14   3   3   35.46    1.01
 -14   3   4    3.81    0.27
 -14   3   5   16.68    0.92
 -14   3   6   21.29    1.02
 -14   3   7    0.76    0.21
 -14   3   8    4.40    0.44
 -14   3   9   10.75    0.69
 -14   3  10    0.26    0.19
 -14   3  11    5.91    0.38
 -14   4  -3   19.22    0.93
 -14   4  -2    0.88    0.23
 -14   4  -1    8.09    0.49
 -14   4   0   10.63    0.35
 -14   4   1    0.32    0.32
 -14   4   2   13.60    0.60
 -14   4   3    4.87    0.57
 -14   4   4   12.06    0.45
 -14   4   5    8.07    0.62
 -14   4   6    9.11    0.63
 -14   4   7    2.15    0.26
 -14   4   8    6.88    0.44
 -14   4   9   12.56    0.60
 -14   4  10    4.19    0.36
 -14   4  11    4.60    0.32
 -14   5  -5   23.66    1.43
 -14   5  -4   10.18    0.50
 -14   5  -3    3.78    0.33
 -14   5  -2   11.04    0.64
 -14   5  -1    1.13    0.22
 -14   5   0    8.48    0.73
 -14   5   1    8.60    0.25
 -14   5   2    6.55    0.31
 -14   5   3    6.32    0.40
 -14   5   4   15.39    1.15
 -14   5   5    6.31    0.70
 -14   5   6    2.11    0.26
 -14   5   7   20.08    1.12
 -14   5   8    9.69    0.59
 -14   5   9    3.14    0.25
 -14   5  10    0.68    0.16
 -14   6  -6    2.08    0.24
 -14   6  -5   10.76    0.56
 -14   6  -4    0.95    0.25
 -14   6  -3    4.23    0.34
 -14   6  -2   29.30    1.54
 -14   6  -1   10.64    0.56
 -14   6   0    8.18    0.55
 -14   6   1   18.25    1.31
 -14   6   2    7.06    0.54
 -14   6   3    6.30    0.55
 -14   6   4   24.78    0.88
 -14   6   5    1.21    0.44
 -14   6   6    0.22    0.21
 -14   6   7    1.66    0.27
 -14   6   8    2.92    0.28
 -14   6   9    2.59    0.29
 -14   7  -9    0.38    0.12
 -14   7  -8    2.79    0.33
 -14   7  -7    4.09    0.41
 -14   7  -6    4.43    0.27
 -14   7  -5    0.22    0.27
 -14   7  -4    6.80    0.48
 -14   7  -3    2.86    0.45
 -14   7  -2    4.40    0.27
 -14   7  -1    6.95    0.69
 -14   7   0    5.54    0.30
 -14   7   1    0.55    0.28
 -14   7   2   12.11    0.75
 -14   7   3    4.10    0.32
 -14   7   4    5.23    0.51
 -14   7   5    1.67    0.21
 -14   7   6    3.56    0.35
 -14   7   7    1.31    0.21
 -14   7   8    1.98    0.26
 -14   8  -9    3.68    0.21
 -14   8  -8    2.43    0.16
 -14   8  -7    4.41    0.34
 -14   8  -6    0.01    0.19
 -14   8  -5    5.02    0.43
 -14   8  -4   28.23    1.17
 -14   8  -3    1.50    0.33
 -14   8  -2    5.78    0.45
 -14   8  -1    9.66    0.44
 -14   8   0   27.54    1.72
 -14   8   1    9.35    0.63
 -14   8   2    2.46    0.41
 -14   8   3    3.69    0.40
 -14   8   4    0.61    0.21
 -14   8   5    9.53    0.67
 -14   8   6    0.59    0.15
 -14   8   7    0.91    0.18
 -14   9  -9    0.88    0.17
 -14   9  -8    0.49    0.13
 -14   9  -7    0.32    0.14
 -14   9  -6    9.01    0.67
 -14   9  -5    2.15    0.17
 -14   9  -4    1.47    0.20
 -14   9  -3    2.74    0.21
 -14   9  -2    2.26    0.35
 -14   9  -1    3.84    0.54
 -14   9   0    2.44    0.40
 -14   9   1    3.19    0.50
 -14   9   2    4.60    0.29
 -14   9   3    8.81    0.55
 -14   9   4    0.26    0.16
 -14   9   5    3.01    0.22
 -14  10  -9    0.65    0.15
 -14  10  -8    0.37    0.11
 -14  10  -7    0.70    0.16
 -14  10  -6    0.02    0.14
 -14  10  -5    7.42    0.34
 -14  10  -4    6.28    0.34
 -14  10  -3    0.34    0.17
 -14  10  -2    6.90    0.49
 -14  10  -1    9.28    0.26
 -14  10   0    0.85    0.26
 -14  10   1    4.15    0.46
 -14  10   2    4.82    0.53
 -14  10   3    1.37    0.18
 -14  10   4    3.19    0.32
 -14  11  -8    1.22    0.14
 -14  11  -7    0.16    0.10
 -14  11  -6    0.21    0.13
 -14  11  -5    6.29    0.26
 -14  11  -4    1.12    0.15
 -14  11  -3    0.69    0.12
 -14  11  -2    2.82    0.23
 -14  11  -1    0.76    0.17
 -14  11   0    0.75    0.12
 -14  11   1    7.62    0.39
 -14  11   2    0.18    0.17
 -14  12  -7    1.21    0.28
 -14  12  -6    1.76    0.18
 -14  12  -5    0.94    0.12
 -14  12  -4    1.40    0.21
 -14  12  -3    1.22    0.14
 -14  12  -2    0.71    0.12
 -14  12  -1    8.93    0.32
 -14  12   0    0.38    0.09
 -13  -5  -4    4.54    0.37
 -13  -5  15    1.53    0.25
 -13  -4  -5    7.34    0.45
 -13  -4  15    1.08    0.18
 -13  -3  -6    1.27    0.20
 -13  -3   9    1.66    0.43
 -13  -3  15    3.67    0.30
 -13  -2  -7    2.49    0.23
 -13  -2   8   14.11    0.51
 -13  -2   9    1.55    0.34
 -13  -2  14    0.30    0.18
 -13  -1  -8    2.66    0.26
 -13  -1   6    3.91    0.66
 -13  -1   7    6.62    0.40
 -13  -1   8    3.67    0.40
 -13  -1   9    6.54    0.40
 -13  -1  13    9.46    0.79
 -13  -1  14    2.40    0.27
 -13   0  -8    9.77    0.46
 -13   0   4   35.31    1.06
 -13   0   5   26.55    1.27
 -13   0   6   17.04    0.94
 -13   0   7    4.59    0.43
 -13   0   8    0.47    0.36
 -13   0   9    0.08    0.22
 -13   0  10    1.03    0.37
 -13   0  11    3.85    0.44
 -13   0  12    8.48    0.47
 -13   0  13    4.03    0.24
 -13   0  14    1.17    0.21
 -13   1  -9    2.86    0.29
 -13   1   2    1.30    0.37
 -13   1   3    3.19    0.47
 -13   1   4   15.99    0.70
 -13   1   5    1.05    0.23
 -13   1   6   11.86    0.52
 -13   1   7    3.35    0.27
 -13   1   8    2.86    0.25
 -13   1   9    2.35    0.23
 -13   1  10    5.01    0.49
 -13   1  11    1.94    0.30
 -13   1  12    1.02    0.25
 -13   1  13    3.64    0.34
 -13   2  -9    3.01    0.34
 -13   2   0   13.06    0.43
 -13   2   1   19.54    0.60
 -13   2   2    7.94    0.40
 -13   2   3   13.93    0.73
 -13   2   4   42.58    2.14
 -13   2   5    4.17    0.34
 -13   2   6   10.82    0.34
 -13   2   7    5.20    0.65
 -13   2   8    9.58    0.54
 -13   2   9    6.85    0.62
 -13   2  10    5.30    0.45
 -13   2  11    0.16    0.19
 -13   2  12    3.08    0.28
 -13   2  13    0.77    0.19
 -13   3 -10    0.20    0.14
 -13   3  -2    8.93    1.23
 -13   3  -1    5.78    0.25
 -13   3   0   21.77    1.04
 -13   3   1   20.19    1.85
 -13   3   2    8.23    0.89
 -13   3   3    4.22    0.34
 -13   3   4    9.75    0.89
 -13   3   5    2.99    0.41
 -13   3   6    4.56    0.31
 -13   3   7   15.36    1.53
 -13   3   8   12.47    0.61
 -13   3   9   14.93    0.67
 -13   3  10   10.45    0.58
 -13   3  11    7.90    0.50
 -13   3  12    1.14    0.20
 -13   4 -10    4.37    0.27
 -13   4  -4    7.18    0.73
 -13   4  -3   78.97    3.03
 -13   4  -2    4.32    0.81
 -13   4  -1    2.23    0.44
 -13   4   0   16.07    1.09
 -13   4   1   20.64    0.44
 -13   4   2    7.75    0.80
 -13   4   3    1.83    0.27
 -13   4   4    3.33    0.52
 -13   4   5    6.31    0.34
 -13   4   6   33.61    2.04
 -13   4   7   12.76    0.94
 -13   4   8    5.45    0.59
 -13   4   9    0.80    0.20
 -13   4  10    1.71    0.24
 -13   4  11    1.76    0.21
 -13   5 -10    0.04    0.15
 -13   5  -6    3.46    0.43
 -13   5  -5    4.73    0.36
 -13   5  -4    3.33    0.27
 -13   5  -3    1.14    0.29
 -13   5  -2    1.65    0.30
 -13   5  -1    9.02    0.61
 -13   5   0   11.43    0.61
 -13   5   1    7.10    0.41
 -13   5   2    0.62    0.51
 -13   5   3    7.24    0.40
 -13   5   4    6.09    0.35
 -13   5   5    9.82    0.50
 -13   5   6    1.68    0.47
 -13   5   7    6.11    0.34
 -13   5   8    3.43    0.45
 -13   5   9   30.64    1.50
 -13   5  10    2.60    0.30
 -13   6 -10    4.19    0.33
 -13   6  -9    1.65    0.24
 -13   6  -8    8.40    0.49
 -13   6  -7   43.67    2.61
 -13   6  -6   12.72    0.67
 -13   6  -5    0.14    0.21
 -13   6  -4    6.21    0.43
 -13   6  -3    2.42    0.69
 -13   6  -2    8.01    0.36
 -13   6  -1    2.18    0.28
 -13   6   0    9.80    0.68
 -13   6   1    7.47    0.62
 -13   6   2    1.57    0.36
 -13   6   3    5.51    1.14
 -13   6   4    1.79    0.45
 -13   6   5    3.88    0.24
 -13   6   6    2.70    0.20
 -13   6   7   10.25    0.65
 -13   6   8    1.44    0.27
 -13   6   9    0.20    0.19
 -13   7 -10    0.56    0.13
 -13   7  -9    0.83    0.12
 -13   7  -8    4.36    0.41
 -13   7  -7   19.77    0.70
 -13   7  -6    2.33    0.15
 -13   7  -5    2.41    0.18
 -13   7  -4   12.80    0.78
 -13   7  -3    5.33    0.52
 -13   7  -2    2.67    0.44
 -13   7  -1    5.28    0.39
 -13   7   0   11.44    0.86
 -13   7   1    8.38    0.49
 -13   7   2    1.43    0.30
 -13   7   3    8.16    0.31
 -13   7   4    2.22    0.52
 -13   7   5    5.76    0.52
 -13   7   6    5.24    0.56
 -13   7   7   10.19    0.47
 -13   7   8    3.50    0.29
 -13   8 -10    4.36    0.52
 -13   8  -9    2.60    0.22
 -13   8  -8    1.34    0.19
 -13   8  -7    0.92    0.24
 -13   8  -6   13.68    0.66
 -13   8  -5    0.06    0.15
 -13   8  -4    6.07    0.30
 -13   8  -3    3.69    0.21
 -13   8  -2   13.55    0.70
 -13   8  -1    9.20    0.91
 -13   8   0   26.33    0.78
 -13   8   1    1.49    0.31
 -13   8   2    3.81    0.47
 -13   8   3    1.32    0.37
 -13   8   4    1.48    0.23
 -13   8   5   11.81    0.72
 -13   8   6    0.93    0.21
 -13   8   7    3.71    0.32
 -13   9 -10    4.91    0.18
 -13   9  -9    3.66    0.60
 -13   9  -8    6.81    0.29
 -13   9  -7    5.59    0.43
 -13   9  -6    7.34    0.20
 -13   9  -5    1.22    0.19
 -13   9  -4    3.78    0.27
 -13   9  -3    2.66    0.49
 -13   9  -2    5.96    0.31
 -13   9  -1    3.13    0.42
 -13   9   0   15.70    0.68
 -13   9   1    6.31    0.44
 -13   9   2    1.74    0.40
 -13   9   3    1.49    0.32
 -13   9   4    5.12    0.38
 -13   9   5    2.27    0.23
 -13   9   6    2.57    0.27
 -13  10 -10    0.65    0.14
 -13  10  -9    1.67    0.16
 -13  10  -8   11.33    0.46
 -13  10  -7    3.97    0.32
 -13  10  -6    0.75    0.11
 -13  10  -5    1.22    0.15
 -13  10  -4    7.73    0.56
 -13  10  -3    2.44    0.14
 -13  10  -2    4.77    0.27
 -13  10  -1   13.93    0.58
 -13  10   0    2.45    0.17
 -13  10   1    8.23    0.39
 -13  10   2    5.61    0.46
 -13  10   3   11.40    0.69
 -13  10   4    2.52    0.22
 -13  11 -10    5.51    0.25
 -13  11  -9    5.16    0.22
 -13  11  -8    6.34    0.25
 -13  11  -7    1.48    0.19
 -13  11  -6    4.23    0.20
 -13  11  -5    1.85    0.18
 -13  11  -4    1.75    0.17
 -13  11  -3    0.33    0.20
 -13  11  -2    0.06    0.16
 -13  11  -1    1.95    0.23
 -13  11   0    5.21    0.32
 -13  11   1    2.39    0.22
 -13  11   2    2.23    0.19
 -13  11   3    2.45    0.19
 -13  12  -9    0.76    0.10
 -13  12  -8    2.58    0.44
 -13  12  -7    3.73    0.19
 -13  12  -6    2.95    0.18
 -13  12  -5    4.44    0.22
 -13  12  -4    2.53    0.35
 -13  12  -3    8.25    0.34
 -13  12  -2    5.77    0.36
 -13  12  -1    3.29    0.20
 -13  12   0    0.04    0.10
 -13  12   1    4.76    0.17
 -13  12   2    1.28    0.15
 -13  13  -8    1.79    0.18
 -13  13  -7    1.80    0.14
 -13  13  -6    7.97    0.26
 -13  13  -5    0.56    0.10
 -13  13  -4    5.84    0.31
 -13  13  -3    1.23    0.15
 -13  13  -2    1.94    0.12
 -13  13  -1    4.37    0.22
 -13  13   0    0.63    0.14
 -13  14  -5    0.40    0.13
 -13  14  -4    1.59    0.14
 -12  -5  -6    5.77    0.33
 -12  -5  -5    2.48    0.20
 -12  -5  -4    2.80    0.30
 -12  -4  -7    1.64    0.22
 -12  -4  -6    1.88    0.21
 -12  -4  -5    4.48    0.39
 -12  -3  -7    4.77    0.29
 -12  -3  -6    4.58    0.41
 -12  -2  -8    0.12    0.14
 -12  -2  -7    4.04    0.34
 -12  -2   7    7.65    0.60
 -12  -1  -9    1.01    0.21
 -12  -1  -8    6.20    0.38
 -12  -1   5    4.39    0.63
 -12  -1   6    6.41    0.72
 -12  -1  15    4.29    0.32
 -12   0  -9    2.29    0.25
 -12   0   4   10.32    0.49
 -12   0   5    5.65    0.74
 -12   0   6    5.09    0.57
 -12   0  14    2.53    0.25
 -12   1 -10    4.47    0.24
 -12   1  -9    1.77    0.21
 -12   1   2   19.20    0.69
 -12   1   3    1.79    0.27
 -12   1   4   12.42    1.71
 -12   1   5   12.98    1.48
 -12   1   6   11.69    0.55
 -12   1   7   17.02    0.74
 -12   1  13    1.61    0.27
 -12   1  14    1.65    0.19
 -12   2 -10    2.15    0.33
 -12   2   0   14.92    1.19
 -12   2   1   11.29    0.74
 -12   2   2   23.49    0.66
 -12   2   3   13.14    0.60
 -12   2   4    4.86    0.48
 -12   2   5    4.23    0.55
 -12   2   6    0.61    0.34
 -12   2   7    1.10    0.27
 -12   2   8    8.40    0.57
 -12   2   9   15.97    0.70
 -12   2  10    3.52    0.37
 -12   2  11    1.82    0.23
 -12   2  12    0.10    0.20
 -12   2  13    2.81    0.34
 -12   3 -11    1.63    0.18
 -12   3 -10    0.05    0.16
 -12   3  -3    0.59    0.18
 -12   3  -2    4.29    0.61
 -12   3  -1   23.07    1.70
 -12   3   0   21.30    0.43
 -12   3   1    5.61    0.53
 -12   3   2   51.84    2.20
 -12   3   3    4.72    0.47
 -12   3   4    3.21    0.28
 -12   3   5    5.50    0.20
 -12   3   6   12.56    1.23
 -12   3   7   16.10    1.18
 -12   3   8    0.82    0.36
 -12   3   9    8.30    0.62
 -12   3  10    4.17    0.52
 -12   3  11    0.50    0.22
 -12   3  12    0.84    0.18
 -12   4 -11    4.82    0.31
 -12   4  -5   13.57    0.71
 -12   4  -4   38.93    1.62
 -12   4  -3    3.71    0.49
 -12   4  -2    5.09    0.24
 -12   4  -1    5.42    0.50
 -12   4   0   21.09    1.51
 -12   4   1   11.76    1.45
 -12   4   2   10.61    0.78
 -12   4   3    0.85    0.24
 -12   4   4    3.28    0.53
 -12   4   5    0.45    0.31
 -12   4   6    1.22    0.23
 -12   4   7    0.00    0.28
 -12   4   8    7.63    0.37
 -12   4   9    6.18    0.75
 -12   4  10   16.63    0.84
 -12   4  11    1.70    0.21
 -12   4  12    2.76    0.26
 -12   5 -11    2.77    0.31
 -12   5 -10   11.77    0.65
 -12   5  -9    0.57    0.20
 -12   5  -8    0.59    0.14
 -12   5  -7    6.38    0.38
 -12   5  -6   26.37    1.35
 -12   5  -5    2.71    0.27
 -12   5  -4   14.38    0.90
 -12   5  -3   11.26    0.43
 -12   5  -2   31.34    1.38
 -12   5  -1    8.84    0.54
 -12   5   0    1.98    0.36
 -12   5   1    5.07    0.67
 -12   5   2    7.95    0.45
 -12   5   3   16.26    1.23
 -12   5   4    1.62    0.31
 -12   5   5   10.15    0.55
 -12   5   6    2.26    0.25
 -12   5   7   14.17    0.64
 -12   5   8    0.94    0.29
 -12   5   9    0.07    0.22
 -12   5  10    2.05    0.27
 -12   5  11    0.96    0.20
 -12   6 -11    4.33    0.31
 -12   6 -10    2.91    0.28
 -12   6  -9    3.26    0.18
 -12   6  -8   25.07    0.94
 -12   6  -7   14.85    0.37
 -12   6  -6    2.46    0.13
 -12   6  -5   25.06    1.29
 -12   6  -4    2.70    0.45
 -12   6  -3    2.44    0.52
 -12   6  -2   12.26    0.58
 -12   6  -1   29.82    1.03
 -12   6   0   27.06    1.11
 -12   6   1   26.87    1.13
 -12   6   2    0.57    0.27
 -12   6   3    5.74    0.24
 -12   6   4   16.02    0.93
 -12   6   5    0.85    0.33
 -12   6   6    4.10    0.36
 -12   6   7    2.61    0.34
 -12   6   8    4.43    0.36
 -12   6   9    2.52    0.22
 -12   6  10    0.15    0.15
 -12   7 -11    2.65    0.30
 -12   7 -10    0.89    0.17
 -12   7  -9    4.70    0.30
 -12   7  -8    7.09    0.25
 -12   7  -7    1.29    0.16
 -12   7  -6    4.18    0.17
 -12   7  -5    4.42    0.25
 -12   7  -4   14.93    0.37
 -12   7  -3    7.48    0.31
 -12   7  -2    9.57    0.74
 -12   7  -1   13.41    0.96
 -12   7   0   11.61    0.83
 -12   7   1   17.73    0.92
 -12   7   2    9.49    0.59
 -12   7   3    1.58    0.44
 -12   7   4    2.79    0.32
 -12   7   5    7.90    0.53
 -12   7   6    2.27    0.38
 -12   7   7    0.38    0.22
 -12   7   8    0.16    0.17
 -12   7   9    1.76    0.20
 -12   8 -12    1.50    0.14
 -12   8 -11    2.23    0.40
 -12   8 -10    1.91    0.18
 -12   8  -9   13.59    0.51
 -12   8  -8    0.49    0.15
 -12   8  -7    6.65    0.32
 -12   8  -6    1.50    0.15
 -12   8  -5    6.56    0.53
 -12   8  -4   18.37    1.71
 -12   8  -3    3.31    0.27
 -12   8  -2   17.42    0.98
 -12   8  -1   30.60    0.83
 -12   8   0    9.14    0.60
 -12   8   1    0.35    0.28
 -12   8   2    5.45    0.34
 -12   8   3    9.17    0.41
 -12   8   4    0.97    0.23
 -12   8   5    9.83    0.60
 -12   8   6    2.33    0.31
 -12   8   7    0.12    0.15
 -12   9 -11    3.35    0.18
 -12   9 -10    3.38    0.17
 -12   9  -9    5.03    0.27
 -12   9  -8    5.29    0.22
 -12   9  -7   19.17    0.74
 -12   9  -6    2.63    0.26
 -12   9  -5    3.91    0.13
 -12   9  -4    3.79    0.21
 -12   9  -3    8.13    0.38
 -12   9  -2    2.81    0.35
 -12   9  -1   12.15    0.40
 -12   9   0    1.53    0.14
 -12   9   1    1.08    0.31
 -12   9   2    0.82    0.26
 -12   9   3    0.14    0.23
 -12   9   4    6.23    0.53
 -12   9   5    2.32    0.27
 -12   9   6    7.54    0.40
 -12  10 -11    0.24    0.13
 -12  10 -10    1.66    0.13
 -12  10  -9    8.60    0.39
 -12  10  -8    2.13    0.50
 -12  10  -7    5.93    0.31
 -12  10  -6    0.77    0.21
 -12  10  -5   16.96    0.85
 -12  10  -4    0.13    0.13
 -12  10  -3   35.65    1.18
 -12  10  -2   18.37    0.51
 -12  10  -1   18.71    0.64
 -12  10   0    8.99    0.41
 -12  10   1    4.24    0.14
 -12  10   2    5.03    0.53
 -12  10   3    1.90    0.28
 -12  10   4    1.95    0.32
 -12  11 -11   18.32    0.66
 -12  11 -10    2.69    0.23
 -12  11  -9    0.84    0.12
 -12  11  -8    2.66    0.17
 -12  11  -7    4.17    0.28
 -12  11  -6    7.27    0.28
 -12  11  -5    6.12    0.21
 -12  11  -4    5.64    0.39
 -12  11  -3    8.61    0.57
 -12  11  -2   36.39    1.22
 -12  11  -1    2.69    0.35
 -12  11   0    5.03    0.59
 -12  11   1   11.12    0.53
 -12  11   2    0.97    0.18
 -12  11   3    0.04    0.17
 -12  12 -11    0.60    0.14
 -12  12 -10    3.49    0.24
 -12  12  -9    0.00    0.12
 -12  12  -8    1.44    0.31
 -12  12  -7    3.74    0.21
 -12  12  -6   17.77    0.70
 -12  12  -5   17.14    0.97
 -12  12  -4    1.75    0.16
 -12  12  -3    8.85    0.54
 -12  12  -2    9.68    0.29
 -12  12  -1    6.46    0.37
 -12  12   0    2.39    0.17
 -12  12   1    4.58    0.26
 -12  12   2    3.78    0.27
 -12  12   3    0.60    0.13
 -12  13 -10    3.73    0.28
 -12  13  -9    3.62    0.22
 -12  13  -8    0.48    0.12
 -12  13  -7    6.07    0.25
 -12  13  -6    0.91    0.12
 -12  13  -5    6.00    0.24
 -12  13  -4   11.58    0.50
 -12  13  -3    2.44    0.25
 -12  13  -2    1.85    0.13
 -12  13  -1    1.76    0.16
 -12  13   0    9.19    0.62
 -12  13   1    1.34    0.20
 -12  14  -9    3.36    0.25
 -12  14  -8    0.12    0.09
 -12  14  -7    1.92    0.12
 -12  14  -6   15.11    0.95
 -12  14  -5    1.19    0.13
 -12  14  -4    4.91    0.95
 -12  14  -3    2.87    0.23
 -12  14  -2    4.79    0.27
 -12  14  -1    3.70    0.22
 -11  -6  -5    3.06    0.20
 -11  -6  -4   12.17    0.72
 -11  -5  -7    0.27    0.14
 -11  -5  -6    0.29    0.17
 -11  -5  -5    1.16    0.18
 -11  -4  -7    3.74    0.30
 -11  -4  -6    0.23    0.17
 -11  -3  -8    1.15    0.18
 -11  -3  -7    1.67    0.24
 -11  -2  -9    0.61    0.19
 -11  -2  -8    0.84    0.22
 -11  -1 -10    0.40    0.15
 -11  -1  -9    0.98    0.18
 -11  -1  -8    0.73    0.21
 -11  -1   5    1.53    0.30
 -11   0 -10    0.68    0.19
 -11   0  -9    1.31    0.22
 -11   0   3    4.11    0.22
 -11   0   4    1.51    0.23
 -11   0   5    6.69    0.37
 -11   1 -11   12.98    0.56
 -11   1 -10    1.51    0.24
 -11   1   1    8.97    0.42
 -11   1   2    7.70    1.24
 -11   1   3    2.52    0.62
 -11   1   4   11.70    0.84
 -11   1   5    4.97    0.59
 -11   1  14   12.52    0.67
 -11   2 -11   12.72    0.61
 -11   2 -10    0.91    0.23
 -11   2  -1    0.24    0.17
 -11   2   0    6.78    0.67
 -11   2   1    1.49    0.54
 -11   2   2    4.53    0.46
 -11   2   3   10.42    0.94
 -11   2   4    1.65    0.49
 -11   2   5    7.74    0.62
 -11   2  13    1.34    0.24
 -11   2  14    7.53    0.42
 -11   3 -11    0.64    0.18
 -11   3  -3    9.83    0.32
 -11   3  -2    0.46    0.30
 -11   3  -1    2.84    0.30
 -11   3   0   14.45    0.53
 -11   3   1    9.16    0.81
 -11   3   2    8.09    0.51
 -11   3   3    3.00    0.34
 -11   3   4    1.83    0.54
 -11   3   5    7.30    0.52
 -11   3   6   41.75    1.69
 -11   3   7    6.57    0.43
 -11   3  11    0.49    0.23
 -11   3  12    7.33    0.56
 -11   3  13    3.08    0.33
 -11   4 -12    0.08    0.13
 -11   4 -11    2.20    0.16
 -11   4 -10    0.18    0.15
 -11   4  -9   18.32    0.59
 -11   4  -8    0.27    0.16
 -11   4  -7    0.61    0.17
 -11   4  -6    1.26    0.20
 -11   4  -5    5.77    0.35
 -11   4  -4    5.92    0.40
 -11   4  -3    0.88    0.22
 -11   4  -2    3.93    0.39
 -11   4  -1   11.30    0.55
 -11   4   0   14.39    0.73
 -11   4   1    3.58    0.19
 -11   4   2    1.42    0.27
 -11   4   3    3.07    0.46
 -11   4   4   14.42    1.08
 -11   4   5   20.24    1.06
 -11   4   6    3.24    0.40
 -11   4   7    4.17    0.26
 -11   4   8    9.58    0.72
 -11   4   9    1.83    0.33
 -11   4  10    3.62    0.42
 -11   4  11    2.38    0.32
 -11   4  12    3.47    0.30
 -11   5 -12    1.57    0.17
 -11   5 -11    1.13    0.13
 -11   5 -10    2.55    0.22
 -11   5  -9    0.34    0.21
 -11   5  -8   25.29    0.93
 -11   5  -7    3.02    0.24
 -11   5  -6    2.66    0.17
 -11   5  -5    1.35    0.18
 -11   5  -4    5.27    0.67
 -11   5  -3    0.41    0.30
 -11   5  -2   10.84    0.87
 -11   5  -1   16.73    0.99
 -11   5   0    0.80    0.17
 -11   5   1    0.97    0.24
 -11   5   2    5.58    0.40
 -11   5   3    8.98    0.75
 -11   5   4   20.58    0.82
 -11   5   5    2.88    0.50
 -11   5   6    2.68    0.44
 -11   5   7    8.03    0.66
 -11   5   8    0.92    0.21
 -11   5   9    3.18    0.31
 -11   5  10    9.43    0.54
 -11   5  11    4.24    0.31
 -11   6 -11    4.16    0.32
 -11   6 -10    0.60    0.15
 -11   6  -9    9.39    0.50
 -11   6  -8   56.91    1.78
 -11   6  -7    7.57    0.45
 -11   6  -6    1.90    0.17
 -11   6  -5    0.92    0.20
 -11   6  -4    3.66    0.17
 -11   6  -3    6.60    0.21
 -11   6  -2    7.05    0.16
 -11   6  -1    3.79    0.47
 -11   6   0    1.70    0.32
 -11   6   1    1.98    0.19
 -11   6   2    7.91    0.67
 -11   6   3   12.11    0.95
 -11   6   4    1.74    0.30
 -11   6   5    7.42    0.42
 -11   6   6    2.06    0.27
 -11   6   7    4.09    0.30
 -11   6   8    2.09    0.26
 -11   6   9    0.10    0.20
 -11   6  10    1.76    0.24
 -11   7 -12    0.24    0.13
 -11   7 -11    1.56    0.17
 -11   7 -10    4.00    0.33
 -11   7  -9    1.11    0.12
 -11   7  -8    4.62    0.17
 -11   7  -7   11.30    0.30
 -11   7  -6   10.04    0.38
 -11   7  -5    0.09    0.16
 -11   7  -4   22.29    0.42
 -11   7  -3   10.52    0.45
 -11   7  -2    2.75    0.43
 -11   7  -1   12.37    0.22
 -11   7   0    8.23    0.58
 -11   7   1    0.89    0.69
 -11   7   2    1.22    0.48
 -11   7   3    7.07    0.68
 -11   7   4    9.66    0.55
 -11   7   5    1.34    0.32
 -11   7   6    0.12    0.21
 -11   7   7    1.04    0.19
 -11   7   8    2.30    0.25
 -11   7   9    0.47    0.20
 -11   8 -13    2.52    0.19
 -11   8 -12   21.21    0.88
 -11   8 -11    2.47    0.16
 -11   8 -10    0.97    0.13
 -11   8  -9    0.17    0.21
 -11   8  -8    3.07    0.46
 -11   8  -7    9.91    0.29
 -11   8  -6    2.14    0.21
 -11   8  -5    6.16    0.21
 -11   8  -4    1.77    0.21
 -11   8  -3    9.06    0.31
 -11   8  -2    4.93    0.34
 -11   8  -1    9.15    0.49
 -11   8   0   16.63    0.51
 -11   8   1    2.39    0.28
 -11   8   2    8.59    0.86
 -11   8   3    6.25    0.47
 -11   8   4    0.64    0.25
 -11   8   5    2.57    0.30
 -11   8   6    2.09    0.29
 -11   8   7    2.34    0.28
 -11   9 -12   24.63    0.74
 -11   9 -11    1.16    0.24
 -11   9 -10    0.27    0.11
 -11   9  -9    6.55    0.20
 -11   9  -8    5.00    0.16
 -11   9  -7    7.16    0.57
 -11   9  -6    9.52    0.65
 -11   9  -5    0.24    0.26
 -11   9  -4   11.46    1.47
 -11   9  -3   10.88    0.61
 -11   9  -2    1.48    0.11
 -11   9  -1    4.50    0.36
 -11   9   0    0.03    0.13
 -11   9   1    1.70    0.22
 -11   9   2    6.09    0.16
 -11   9   3    5.88    0.26
 -11   9   4    1.75    0.23
 -11   9   5    0.81    0.17
 -11  10 -12    3.35    0.21
 -11  10 -11    4.08    0.29
 -11  10 -10    1.10    0.17
 -11  10  -9   23.70    1.02
 -11  10  -8    1.35    0.13
 -11  10  -7    5.48    0.39
 -11  10  -6    3.33    0.26
 -11  10  -5   20.41    0.62
 -11  10  -4    3.70    0.28
 -11  10  -3    7.17    1.71
 -11  10  -2    5.08    0.21
 -11  10  -1    4.04    0.24
 -11  10   0    4.05    0.34
 -11  10   1    2.10    0.21
 -11  10   2    0.88    0.16
 -11  10   3    1.44    0.33
 -11  10   4    5.26    0.31
 -11  11 -12    0.03    0.09
 -11  11 -11    5.39    0.25
 -11  11 -10    0.85    0.19
 -11  11  -9    1.43    0.12
 -11  11  -8    4.23    0.76
 -11  11  -7    5.91    0.40
 -11  11  -6    1.07    0.22
 -11  11  -5    0.79    0.16
 -11  11  -4    1.66    0.14
 -11  11  -3    0.76    0.15
 -11  11  -2    1.92    0.40
 -11  11  -1    2.73    0.24
 -11  11   0    5.05    0.34
 -11  11   1    1.82    0.19
 -11  11   2    0.41    0.12
 -11  11   3    7.38    0.50
 -11  11   4    0.80    0.23
 -11  12 -12    1.10    0.13
 -11  12 -11    0.47    0.31
 -11  12 -10    1.03    0.16
 -11  12  -9    0.14    0.14
 -11  12  -8    0.12    0.16
 -11  12  -7    7.71    0.45
 -11  12  -6    1.46    0.25
 -11  12  -5    0.73    0.16
 -11  12  -4    7.19    0.38
 -11  12  -3    5.92    0.28
 -11  12  -2    1.71    0.31
 -11  12  -1    0.17    0.15
 -11  12   0    0.28    0.13
 -11  12   1    2.38    0.31
 -11  12   2    4.97    0.39
 -11  12   3    7.27    0.29
 -11  12   4    3.68    0.30
 -11  13 -11    6.07    0.26
 -11  13 -10    4.84    0.25
 -11  13  -9    1.38    0.15
 -11  13  -8    1.37    0.15
 -11  13  -7    0.50    0.14
 -11  13  -6    5.38    0.26
 -11  13  -5    5.61    0.31
 -11  13  -4    5.18    0.28
 -11  13  -3    3.06    0.40
 -11  13  -2    1.47    0.20
 -11  13  -1    2.99    0.17
 -11  13   0    0.21    0.17
 -11  13   1    1.59    0.18
 -11  13   2    1.05    0.16
 -11  14 -10   20.01    0.50
 -11  14  -9    4.80    0.26
 -11  14  -8    1.12    0.11
 -11  14  -7    2.80    0.22
 -11  14  -6    3.16    0.19
 -11  14  -5    0.82    0.14
 -11  14  -4   14.15    0.39
 -11  14  -3    4.48    0.28
 -11  14  -2    0.80    0.19
 -11  14  -1    0.68    0.09
 -11  14   0    3.48    0.24
 -11  14   1    1.99    0.17
 -11  15  -9    0.10    0.12
 -11  15  -8    4.72    0.24
 -11  15  -7    2.14    0.17
 -11  15  -6    2.43    0.17
 -11  15  -5    1.69    0.19
 -11  15  -4    0.36    0.14
 -11  15  -3    0.72    0.13
 -11  15  -2    0.61    0.12
 -10  -6  -7    0.28    0.13
 -10  -6  -6    2.20    0.32
 -10  -6  -5    5.04    0.29
 -10  -6  -4    0.17    0.18
 -10  -5  -8    2.63    0.18
 -10  -5  -7    0.03    0.15
 -10  -5  -6    0.82    0.17
 -10  -5  -5    4.16    0.19
 -10  -4  -8    0.47    0.21
 -10  -4  -7    2.71    0.20
 -10  -4  -6    2.57    0.36
 -10  -3  -9    0.41    0.14
 -10  -3  -8    0.88    0.25
 -10  -3  -7    3.99    0.50
 -10  -2 -10    0.91    0.19
 -10  -2  -9    1.39    0.33
 -10  -2  -8    0.25    0.17
 -10  -1 -10    0.37    0.16
 -10  -1  -9    1.82    0.32
 -10   0 -11    0.90    0.20
 -10   0 -10    1.25    0.23
 -10   0  -9    1.90    0.28
 -10   1 -11    0.13    0.17
 -10   1 -10    1.47    0.26
 -10   1  15    3.53    0.30
 -10   2 -12    1.54    0.23
 -10   2 -11    0.57    0.20
 -10   2 -10    1.64    0.30
 -10   2   4    4.27    0.19
 -10   2  14    1.63    0.24
 -10   3 -12    0.04    0.09
 -10   3 -11    0.52    0.16
 -10   3 -10   13.83    0.55
 -10   3  -9   17.90    1.04
 -10   3  -8    2.59    0.24
 -10   3  -4    1.89    0.32
 -10   3  -3    9.79    0.54
 -10   3   3   39.22    1.35
 -10   3   4   43.33    2.19
 -10   3  13    0.23    0.18
 -10   4 -12    1.02    0.20
 -10   4 -11    6.18    0.41
 -10   4 -10    5.28    0.48
 -10   4  -9    2.58    0.21
 -10   4  -8    2.64    0.19
 -10   4  -7    1.25    0.11
 -10   4  -6    1.29    0.32
 -10   4  -5    5.19    0.19
 -10   4  -4    5.64    0.22
 -10   4  -3   18.68    0.58
 -10   4  -2    9.32    0.65
 -10   4  -1    4.79    0.95
 -10   4   0   24.78    0.55
 -10   4   1   56.48    2.87
 -10   4   2    8.91    0.41
 -10   4   3    3.87    0.20
 -10   4   4   36.61    0.94
 -10   4   5    3.33    0.20
 -10   4   6   11.57    0.66
 -10   4  10   13.98    0.88
 -10   4  11    1.86    0.32
 -10   4  12    5.74    0.37
 -10   5 -13    1.44    0.19
 -10   5 -12    2.22    0.24
 -10   5 -11    2.00    0.12
 -10   5 -10    3.39    0.36
 -10   5  -9    2.17    0.14
 -10   5  -8    0.87    0.21
 -10   5  -7    1.85    0.10
 -10   5  -6    0.45    0.13
 -10   5  -5    4.93    0.40
 -10   5  -4    4.26    0.13
 -10   5  -3   32.62    0.57
 -10   5  -2   53.70    0.89
 -10   5  -1    6.71    0.97
 -10   5   0    6.30    0.50
 -10   5   1    2.20    0.47
 -10   5   2   63.61    2.44
 -10   5   3    4.60    0.42
 -10   5   4   18.73    1.83
 -10   5   5    0.73    0.45
 -10   5   6    4.79    0.45
 -10   5   7    1.79    0.24
 -10   5   8    1.71    0.31
 -10   5   9    9.74    0.63
 -10   5  10    2.79    0.24
 -10   5  11    4.88    0.38
 -10   6 -13    4.83    0.32
 -10   6 -12    0.99    0.19
 -10   6 -11    0.81    0.16
 -10   6 -10    2.15    0.12
 -10   6  -9    2.77    0.13
 -10   6  -8    2.34    0.20
 -10   6  -7    2.69    0.26
 -10   6  -6    2.71    0.18
 -10   6  -5    8.19    0.46
 -10   6  -4   40.52    1.51
 -10   6  -3    4.97    0.24
 -10   6  -2    2.61    0.70
 -10   6  -1    9.96    0.12
 -10   6   0   29.31    1.51
 -10   6   1    2.67    0.19
 -10   6   2   20.52    0.92
 -10   6   3    8.52    0.59
 -10   6   4    4.57    0.23
 -10   6   5   14.10    1.38
 -10   6   6    0.98    0.21
 -10   6   7    2.32    0.35
 -10   6   8    1.11    0.20
 -10   6   9    0.43    0.23
 -10   6  10    7.08    0.36
 -10   7 -13    1.52    0.17
 -10   7 -12    1.84    0.14
 -10   7 -11    7.83    0.31
 -10   7 -10    2.81    0.31
 -10   7  -9    4.06    0.33
 -10   7  -8    1.48    0.23
 -10   7  -7    3.66    0.33
 -10   7  -6   12.16    0.64
 -10   7  -5    4.79    0.31
 -10   7  -4   15.56    0.29
 -10   7  -3    4.87    0.26
 -10   7  -2    7.18    0.34
 -10   7  -1    3.74    0.62
 -10   7   0    1.78    0.13
 -10   7   1    2.26    0.20
 -10   7   2   12.03    0.64
 -10   7   3   13.74    1.12
 -10   7   4    0.16    0.31
 -10   7   5    5.27    0.33
 -10   7   6   10.57    0.87
 -10   7   7    0.98    0.32
 -10   7   8    1.01    0.26
 -10   8 -13    6.92    0.73
 -10   8 -12   15.73    0.54
 -10   8 -11    0.91    0.21
 -10   8 -10    0.95    0.21
 -10   8  -9    2.64    0.19
 -10   8  -8    3.29    0.16
 -10   8  -7    0.39    0.20
 -10   8  -6    1.38    0.14
 -10   8  -5    2.03    0.18
 -10   8  -4    0.77    0.14
 -10   8  -3   11.21    0.33
 -10   8  -2    5.64    0.15
 -10   8  -1    4.52    0.22
 -10   8   0   11.02    0.63
 -10   8   1    0.60    0.16
 -10   8   2   15.45    0.46
 -10   8   3    4.29    0.26
 -10   8   4    5.84    0.48
 -10   8   5    0.04    0.24
 -10   8   6    1.27    0.33
 -10   9 -13    2.54    0.12
 -10   9 -12    1.06    0.19
 -10   9 -11    1.92    0.16
 -10   9 -10    0.06    0.12
 -10   9  -9    0.35    0.13
 -10   9  -8    2.02    0.13
 -10   9  -7    3.68    0.29
 -10   9  -6    0.11    0.11
 -10   9  -5    9.41    0.37
 -10   9  -4    8.78    0.27
 -10   9  -3    4.57    0.15
 -10   9  -2   20.94    0.89
 -10   9  -1    4.88    0.25
 -10   9   0    1.66    0.24
 -10   9   1   16.00    0.84
 -10   9   2    2.83    0.23
 -10   9   3    2.58    0.45
 -10   9   4    2.03    0.26
 -10  10 -13    0.55    0.09
 -10  10 -12    0.48    0.22
 -10  10 -11    2.92    0.17
 -10  10 -10    0.74    0.15
 -10  10  -9   11.53    0.69
 -10  10  -8    4.37    0.33
 -10  10  -7    5.14    0.21
 -10  10  -6   25.57    1.21
 -10  10  -5   18.13    0.65
 -10  10  -4    0.21    0.20
 -10  10  -3    1.30    0.11
 -10  10  -2    7.79    0.48
 -10  10  -1    3.72    0.26
 -10  10   0    1.18    0.22
 -10  10   1    7.02    0.35
 -10  10   2    1.96    0.33
 -10  10   3    2.35    0.12
 -10  10   4    1.52    0.34
 -10  10   5    0.44    0.17
 -10  11 -13    2.17    0.13
 -10  11 -12    7.52    0.36
 -10  11 -11    1.33    0.24
 -10  11 -10    0.28    0.15
 -10  11  -9    0.74    0.22
 -10  11  -8    7.49    0.39
 -10  11  -7   15.58    0.54
 -10  11  -6    5.59    0.32
 -10  11  -5    0.15    0.17
 -10  11  -4    0.47    0.25
 -10  11  -3    6.02    0.13
 -10  11  -2    3.04    0.22
 -10  11  -1    0.43    0.23
 -10  11   0    3.58    0.29
 -10  11   1    2.55    0.52
 -10  11   2    2.00    0.27
 -10  11   3    0.44    0.19
 -10  11   4    7.81    0.38
 -10  11   5    6.09    0.30
 -10  12 -13    4.43    0.52
 -10  12 -12    6.92    0.22
 -10  12 -11    2.83    0.38
 -10  12 -10    4.29    0.25
 -10  12  -9    6.26    0.38
 -10  12  -8   10.13    0.32
 -10  12  -7    1.51    0.15
 -10  12  -6    3.43    0.23
 -10  12  -5    0.54    0.33
 -10  12  -4    3.35    0.14
 -10  12  -3    2.54    0.26
 -10  12  -2   10.74    0.42
 -10  12  -1    5.50    0.19
 -10  12   0    0.43    0.27
 -10  12   1    2.85    0.34
 -10  12   2    0.28    0.16
 -10  12   3    1.67    0.19
 -10  12   4    3.22    0.22
 -10  12   5    0.75    0.13
 -10  13 -12    1.80    0.26
 -10  13 -11    0.34    0.24
 -10  13 -10    3.56    0.24
 -10  13  -9    0.25    0.11
 -10  13  -8    0.42    0.12
 -10  13  -7    9.02    0.36
 -10  13  -6    0.27    0.13
 -10  13  -5    1.11    0.28
 -10  13  -4    0.51    0.15
 -10  13  -3    8.46    1.02
 -10  13  -2    0.84    0.19
 -10  13  -1    4.23    0.31
 -10  13   0    1.13    0.22
 -10  13   1    1.23    0.26
 -10  13   2    1.68    0.26
 -10  13   3    1.76    0.18
 -10  14 -12    0.03    0.08
 -10  14 -11    2.97    0.45
 -10  14 -10    9.79    0.24
 -10  14  -9    0.90    0.18
 -10  14  -8    0.35    0.29
 -10  14  -7    1.49    0.15
 -10  14  -6    0.32    0.12
 -10  14  -5    0.62    0.21
 -10  14  -4    6.74    0.52
 -10  14  -3    1.72    0.21
 -10  14  -2    2.84    0.12
 -10  14  -1    2.32    0.22
 -10  14   0    2.12    0.20
 -10  14   1    0.39    0.19
 -10  14   2    0.10    0.13
 -10  15 -10    1.20    0.13
 -10  15  -9    3.65    0.18
 -10  15  -8    0.14    0.12
 -10  15  -7    0.91    0.15
 -10  15  -6    0.11    0.13
 -10  15  -5    6.16    0.44
 -10  15  -4    2.38    0.19
 -10  15  -3    3.58    0.29
 -10  15  -2    1.12    0.11
 -10  15  -1    1.05    0.33
 -10  16  -8    1.12    0.10
 -10  16  -7    6.38    0.36
 -10  16  -6    2.09    0.18
 -10  16  -5    0.42    0.12
 -10  16  -4    0.66    0.14
  -9  -6  -7    0.60    0.15
  -9  -6  -6    0.95    0.23
  -9  -6  -5    3.90    0.26
  -9  -6  -4    6.01    0.38
  -9  -5  -8    0.23    0.15
  -9  -5  -7   15.75    0.87
  -9  -5  -6    5.80    0.44
  -9  -5  -5   12.08    0.76
  -9  -4  -9    1.45    0.25
  -9  -4  -8    0.25    0.19
  -9  -4  -7    6.60    0.38
  -9  -4  -6    8.98    0.55
  -9  -3 -10    4.16    0.28
  -9  -3  -9    0.36    0.16
  -9  -3  -8    4.30    0.35
  -9  -3  -7    3.13    0.38
  -9  -2 -10    1.31    0.23
  -9  -2  -9    5.05    0.50
  -9  -2  -8   10.29    0.44
  -9  -1 -11    4.97    0.31
  -9  -1 -10    0.27    0.19
  -9  -1  -9    1.81    0.23
  -9   0 -12    0.05    0.14
  -9   0 -11    3.93    0.32
  -9   0 -10   15.30    0.74
  -9   1 -12    7.20    0.47
  -9   1 -11    6.08    0.50
  -9   1 -10   17.55    0.84
  -9   2 -13    1.08    0.17
  -9   2 -12    0.94    0.14
  -9   2 -11    1.65    0.19
  -9   2 -10    0.73    0.20
  -9   2  -9   11.89    0.72
  -9   2  -8    1.68    0.35
  -9   3 -13    1.84    0.13
  -9   3 -12    4.11    0.18
  -9   3 -11    3.87    0.22
  -9   3 -10    2.56    0.31
  -9   3  -9    6.77    0.31
  -9   3  -8   15.27    0.79
  -9   3  -7   13.01    0.25
  -9   3  -6    0.77    0.11
  -9   3  -5   30.64    0.48
  -9   3  -4    7.78    0.16
  -9   3  -3   36.10    1.47
  -9   3  -2    2.02    0.15
  -9   3  -1    2.82    0.46
  -9   3   0    4.57    0.55
  -9   3  13    0.49    0.20
  -9   4 -13    1.33    0.14
  -9   4 -12    0.77    0.12
  -9   4 -11    7.40    1.04
  -9   4 -10    1.35    0.28
  -9   4  -9    3.24    0.19
  -9   4  -8    1.92    0.14
  -9   4  -7   21.22    0.72
  -9   4  -6    1.73    0.19
  -9   4  -5   52.60    1.86
  -9   4  -4    1.53    0.54
  -9   4  -3    8.15    0.24
  -9   4  -2   12.84    0.43
  -9   4  -1    1.92    0.26
  -9   4   0    8.39    0.36
  -9   4   1    5.16    0.32
  -9   4   4    9.21    0.21
  -9   4  12    3.66    0.37
  -9   5 -14    3.27    0.19
  -9   5 -13   21.27    1.11
  -9   5 -12    4.06    0.23
  -9   5 -11    1.25    0.21
  -9   5 -10    2.12    0.17
  -9   5  -9   15.55    1.24
  -9   5  -8    2.70    0.11
  -9   5  -7   15.21    0.27
  -9   5  -6    7.38    0.19
  -9   5  -5   17.50    0.21
  -9   5  -4   46.08    3.17
  -9   5  -3    7.59    0.95
  -9   5  -2    6.25    0.32
  -9   5  -1    2.53    0.17
  -9   5   0    2.50    0.34
  -9   5   1   23.65    1.00
  -9   5   2    0.54    0.49
  -9   5   3    9.96    0.26
  -9   5   4   10.41    1.04
  -9   5   5   11.68    0.40
  -9   5   6    6.52    0.66
  -9   5   9   13.17    0.68
  -9   5  10    0.62    0.28
  -9   5  11    0.53    0.20
  -9   6 -14    4.06    0.29
  -9   6 -13    3.99    0.25
  -9   6 -12    0.37    0.18
  -9   6 -11    5.86    0.31
  -9   6 -10   12.05    0.42
  -9   6  -9    3.69    0.39
  -9   6  -8   15.88    0.78
  -9   6  -7   22.41    0.62
  -9   6  -6   17.50    0.33
  -9   6  -5   32.08    0.86
  -9   6  -4   21.85    0.14
  -9   6  -3   14.27    1.45
  -9   6  -2    1.79    0.18
  -9   6  -1   11.37    0.36
  -9   6   0    8.13    0.26
  -9   6   1   12.53    0.12
  -9   6   2   19.02    0.21
  -9   6   3   10.59    0.89
  -9   6   4    4.18    0.56
  -9   6   5    3.45    0.85
  -9   6   6   12.30    0.93
  -9   6   7   33.62    1.86
  -9   6   8   21.46    1.03
  -9   6   9    1.55    0.32
  -9   7 -14    0.52    0.20
  -9   7 -13    3.23    0.15
  -9   7 -12    3.51    0.17
  -9   7 -11    4.84    0.37
  -9   7 -10    6.33    0.31
  -9   7  -9   13.98    0.79
  -9   7  -8    0.00    0.13
  -9   7  -7   14.28    0.34
  -9   7  -6   41.98    0.91
  -9   7  -5    8.80    0.46
  -9   7  -4    2.15    0.14
  -9   7  -3    1.44    0.16
  -9   7  -2   10.12    0.48
  -9   7  -1    5.78    0.38
  -9   7   0    8.29    0.19
  -9   7   1   14.85    0.83
  -9   7   2    1.66    0.14
  -9   7   3    4.47    0.41
  -9   7   4    7.59    0.42
  -9   7   5   42.20    1.76
  -9   7   6    4.38    0.18
  -9   7   7    6.53    0.71
  -9   8 -14    3.17    0.14
  -9   8 -13    2.02    0.16
  -9   8 -12    2.89    0.46
  -9   8 -11    4.14    0.26
  -9   8 -10    7.14    0.52
  -9   8  -9   11.87    0.36
  -9   8  -8   36.90    0.96
  -9   8  -7    6.91    0.26
  -9   8  -6    6.73    0.22
  -9   8  -5    2.10    0.18
  -9   8  -4    9.43    0.24
  -9   8  -3    5.20    0.21
  -9   8  -2    4.68    0.16
  -9   8  -1    5.78    0.15
  -9   8   0    2.35    0.11
  -9   8   1    9.29    0.18
  -9   8   2   28.19    0.88
  -9   8   3    6.52    0.40
  -9   8   4    2.78    0.27
  -9   8   5    0.83    0.20
  -9   9 -14    4.55    0.25
  -9   9 -13    3.90    0.24
  -9   9 -12    1.49    0.14
  -9   9 -11    2.06    0.20
  -9   9 -10    2.00    0.41
  -9   9  -9    5.78    0.26
  -9   9  -8   19.73    0.49
  -9   9  -7    1.69    0.17
  -9   9  -6    6.44    0.17
  -9   9  -5   10.11    0.21
  -9   9  -4    8.04    0.28
  -9   9  -3    0.45    0.20
  -9   9  -2    0.20    0.11
  -9   9  -1    2.60    0.10
  -9   9   0   10.66    0.50
  -9   9   1    4.01    0.09
  -9   9   2   10.57    0.26
  -9   9   3   15.44    0.55
  -9   9   4    2.74    0.33
  -9   9   5    0.02    0.19
  -9  10 -14    0.45    0.10
  -9  10 -13    0.02    0.10
  -9  10 -12    4.24    0.27
  -9  10 -11    1.70    0.33
  -9  10 -10    1.76    0.27
  -9  10  -9    0.91    0.18
  -9  10  -8    1.75    0.15
  -9  10  -7    5.52    0.33
  -9  10  -6    1.64    0.18
  -9  10  -5    3.93    0.19
  -9  10  -4    1.50    0.15
  -9  10  -3    0.29    0.19
  -9  10  -2    9.29    0.43
  -9  10  -1    0.12    0.12
  -9  10   0    4.34    0.28
  -9  10   1    3.73    0.26
  -9  10   2    1.74    0.29
  -9  10   3    1.36    0.23
  -9  10   4    9.90    0.47
  -9  10   5    0.66    0.23
  -9  10   6    4.40    0.31
  -9  11 -14    1.68    0.21
  -9  11 -13    3.26    0.35
  -9  11 -12    1.72    0.39
  -9  11 -11    1.04    0.14
  -9  11 -10    0.40    0.15
  -9  11  -9    5.67    0.45
  -9  11  -8    5.06    0.47
  -9  11  -7    5.28    0.33
  -9  11  -6    5.60    0.30
  -9  11  -5    2.23    0.12
  -9  11  -4    1.80    0.23
  -9  11  -3    1.71    0.13
  -9  11  -2    0.95    0.14
  -9  11  -1    2.72    0.20
  -9  11   0    0.77    0.14
  -9  11   1    5.24    0.59
  -9  11   2    7.98    0.40
  -9  11   3    1.19    0.26
  -9  11   4    3.65    0.30
  -9  11   5    0.61    0.15
  -9  11   6    0.28    0.13
  -9  12 -14    9.21    0.38
  -9  12 -13    3.99    0.15
  -9  12 -12    6.37    0.29
  -9  12 -11    1.97    0.12
  -9  12 -10    4.24    0.37
  -9  12  -9    6.15    0.23
  -9  12  -8    1.74    0.27
  -9  12  -7    1.51    0.17
  -9  12  -6    0.81    0.18
  -9  12  -5    4.22    0.28
  -9  12  -4    5.51    0.40
  -9  12  -3   12.82    0.54
  -9  12  -2    7.20    0.44
  -9  12  -1    6.38    0.34
  -9  12   0    0.97    0.16
  -9  12   1    2.02    0.34
  -9  12   2   12.08    0.73
  -9  12   3    1.79    0.23
  -9  12   4    0.50    0.18
  -9  12   5    2.08    0.20
  -9  13 -13    5.80    0.28
  -9  13 -12    3.66    0.12
  -9  13 -11    4.76    0.15
  -9  13 -10    0.38    0.12
  -9  13  -9    0.66    0.13
  -9  13  -8    8.73    0.35
  -9  13  -7    5.74    0.38
  -9  13  -6    0.97    0.14
  -9  13  -5    4.11    0.32
  -9  13  -4    1.33    0.38
  -9  13  -3    7.35    0.25
  -9  13  -2    1.23    0.25
  -9  13  -1    2.93    0.33
  -9  13   0    2.19    0.33
  -9  13   1    0.12    0.22
  -9  13   2    1.69    0.37
  -9  13   3    6.44    0.36
  -9  13   4    1.45    0.14
  -9  14 -13    3.90    0.23
  -9  14 -12    7.61    0.22
  -9  14 -11    0.69    0.09
  -9  14 -10    0.66    0.10
  -9  14  -9    3.67    0.25
  -9  14  -8   10.25    0.27
  -9  14  -7    2.57    0.40
  -9  14  -6    2.79    0.26
  -9  14  -5    1.10    0.26
  -9  14  -4    3.16    0.56
  -9  14  -3   15.24    0.76
  -9  14  -2    6.08    0.41
  -9  14  -1    5.74    0.40
  -9  14   0    6.56    0.28
  -9  14   1    4.78    0.33
  -9  14   2    3.85    0.33
  -9  15 -12    1.16    0.21
  -9  15 -11    1.49    0.11
  -9  15 -10    3.68    0.13
  -9  15  -9    5.23    0.26
  -9  15  -8    6.51    0.37
  -9  15  -7    1.08    0.13
  -9  15  -6    0.19    0.08
  -9  15  -5    0.49    0.20
  -9  15  -4    4.89    0.24
  -9  15  -3    1.18    0.15
  -9  15  -2    3.20    0.44
  -9  15  -1    1.59    0.14
  -9  15   0    1.92    0.14
  -9  16 -10    1.05    0.15
  -9  16  -9    0.27    0.06
  -9  16  -8    4.00    0.19
  -9  16  -7    0.06    0.15
  -9  16  -6    0.08    0.10
  -9  16  -5    1.06    0.10
  -9  16  -4    0.61    0.14
  -9  16  -3    0.89    0.12
  -9  16  -2    0.76    0.12
  -8  -7  -6    6.14    0.39
  -8  -7  -5    9.01    0.56
  -8  -6  -8    1.51    0.24
  -8  -6  -7    5.08    0.37
  -8  -6  -6   15.13    1.10
  -8  -6  -5    2.55    0.48
  -8  -6  -4   10.28    0.81
  -8  -5  -9    0.54    0.15
  -8  -5  -8    5.15    0.37
  -8  -5  -7    5.94    0.49
  -8  -5  -6   21.26    0.64
  -8  -5  -5    8.59    0.87
  -8  -4 -10    0.44    0.15
  -8  -4  -9    2.83    0.35
  -8  -4  -8    0.25    0.24
  -8  -4  -7    4.26    0.32
  -8  -4  -6   25.45    0.94
  -8  -3 -10    1.02    0.19
  -8  -3  -9    5.13    0.45
  -8  -3  -8    2.29    0.34
  -8  -3  -7    4.68    0.53
  -8  -2 -11    3.33    0.26
  -8  -2 -10    0.23    0.19
  -8  -2  -9    0.38    0.21
  -8  -2  -8    0.29    0.23
  -8  -1 -12    3.03    0.28
  -8  -1 -11    0.76    0.22
  -8  -1 -10   10.81    0.61
  -8  -1  -9   21.48    0.94
  -8   0 -12    0.06    0.17
  -8   0 -11    7.74    0.72
  -8   0 -10   11.14    0.67
  -8   1 -13    1.32    0.11
  -8   1 -12    8.64    0.36
  -8   1 -11    1.75    0.14
  -8   1 -10    2.54    0.98
  -8   1  -9    4.81    0.31
  -8   1  -6    3.06    0.26
  -8   1  -5   10.21    0.70
  -8   1  -4    3.63    0.16
  -8   1  -3    9.00    0.80
  -8   1  -2   58.18    1.01
  -8   2 -13    0.07    0.10
  -8   2 -12    0.13    0.11
  -8   2 -11    2.34    0.15
  -8   2 -10    0.88    0.18
  -8   2  -9    4.40    0.27
  -8   2  -8    3.69    0.21
  -8   2  -7   27.26    1.15
  -8   2  -6    2.72    0.50
  -8   2  -5    9.31    0.22
  -8   2  -4  112.99    4.09
  -8   2  -3    5.10    0.36
  -8   2  -2    3.67    0.33
  -8   2  -1   34.22    0.35
  -8   2   0  200.02   11.74
  -8   2   1   25.89    0.57
  -8   3 -14    5.51    0.35
  -8   3 -13    1.87    0.16
  -8   3 -12    0.72    0.12
  -8   3 -11    2.77    0.16
  -8   3 -10    5.42    0.44
  -8   3  -9    4.52    0.21
  -8   3  -8    3.28    0.21
  -8   3  -7   10.73    0.23
  -8   3  -6   85.05    3.47
  -8   3  -5    2.75    0.44
  -8   3  -4   48.08    1.66
  -8   3  -3    4.30    0.34
  -8   3  -2   32.10    1.43
  -8   3  -1    8.03    1.14
  -8   3   0   64.72    0.29
  -8   3   1   47.44    1.28
  -8   3   2   79.79    1.94
  -8   4 -14    5.98    0.58
  -8   4 -13    6.32    0.30
  -8   4 -12    5.68    0.33
  -8   4 -11    7.17    0.41
  -8   4 -10    6.22    0.44
  -8   4  -9    9.75    0.38
  -8   4  -8   27.99    0.62
  -8   4  -7    7.54    0.29
  -8   4  -6   23.00    0.28
  -8   4  -5   13.35    1.12
  -8   4  -4    9.24    0.25
  -8   4  -3   16.65    0.65
  -8   4  -2   94.09    2.08
  -8   4  -1   12.38    1.25
  -8   4   0   24.55    2.03
  -8   4   1   27.99    0.99
  -8   4   2   16.20    1.30
  -8   4   3   39.21    0.38
  -8   5 -14    3.33    0.27
  -8   5 -13    3.38    0.28
  -8   5 -12    3.42    0.27
  -8   5 -11    1.44    0.15
  -8   5 -10    0.10    0.20
  -8   5  -9    5.31    0.25
  -8   5  -8   18.58    0.53
  -8   5  -7    2.70    0.15
  -8   5  -6    3.65    0.33
  -8   5  -5   36.19    0.92
  -8   5  -4   32.46    1.74
  -8   5  -3    2.97    0.20
  -8   5  -2   91.01    3.54
  -8   5  -1    1.92    0.56
  -8   5   0    7.15    0.19
  -8   5   1  121.08    4.43
  -8   5   2    4.96    0.31
  -8   5   3    3.52    0.45
  -8   5   4   12.18    0.19
  -8   5  10    2.81    0.33
  -8   6 -15   15.50    0.64
  -8   6 -14    3.27    0.25
  -8   6 -13    7.25    0.49
  -8   6 -12    4.33    0.31
  -8   6 -11    0.35    0.14
  -8   6 -10    3.52    0.25
  -8   6  -9    9.48    0.26
  -8   6  -8   25.72    0.63
  -8   6  -7    7.78    0.25
  -8   6  -6    5.06    0.23
  -8   6  -5   45.66    1.20
  -8   6  -4   33.21    0.82
  -8   6  -3   21.79    0.88
  -8   6  -2   18.28    0.55
  -8   6  -1   66.39    2.62
  -8   6   0    8.29    0.41
  -8   6   1   59.09    1.80
  -8   6   2    2.18    0.22
  -8   6   3    6.68    0.30
  -8   6   4    0.45    0.29
  -8   6   5   18.12    0.63
  -8   6   6    5.83    0.38
  -8   6   7    4.87    0.44
  -8   6   8    5.80    0.47
  -8   7 -15    0.84    0.15
  -8   7 -14    3.92    0.28
  -8   7 -13    2.61    0.18
  -8   7 -12   15.57    0.73
  -8   7 -11   20.84    0.58
  -8   7 -10   25.79    0.79
  -8   7  -9   10.17    0.27
  -8   7  -8    4.75    0.17
  -8   7  -7   46.18    1.03
  -8   7  -6    1.16    0.29
  -8   7  -5    0.27    0.10
  -8   7  -4    2.92    0.16
  -8   7  -3  125.65    3.64
  -8   7  -2    8.35    0.42
  -8   7  -1   59.02    2.07
  -8   7   0    8.55    0.30
  -8   7   1    1.54    0.10
  -8   7   2   17.21    0.30
  -8   7   3   40.50    0.83
  -8   7   4    7.66    0.18
  -8   7   5   16.93    0.92
  -8   7   6    1.85    0.32
  -8   8 -15    0.41    0.16
  -8   8 -14    4.67    0.19
  -8   8 -13    4.65    0.42
  -8   8 -12    1.96    0.35
  -8   8 -11   14.14    0.58
  -8   8 -10    0.18    0.18
  -8   8  -9   24.62    0.76
  -8   8  -8   10.39    0.38
  -8   8  -7   17.11    0.40
  -8   8  -6   15.95    0.17
  -8   8  -5   45.39    1.49
  -8   8  -4    4.58    0.21
  -8   8  -3   13.80    0.49
  -8   8  -2    7.58    0.29
  -8   8  -1   15.85    0.53
  -8   8   0   36.53    1.14
  -8   8   1    4.68    0.17
  -8   8   2    8.44    0.37
  -8   8   3    7.08    0.26
  -8   8   4    6.40    0.24
  -8   8   5   17.71    0.65
  -8   8   6    4.63    0.38
  -8   9 -15    8.66    0.35
  -8   9 -14    5.86    0.69
  -8   9 -13    7.11    0.23
  -8   9 -12    0.92    0.23
  -8   9 -11   15.93    0.85
  -8   9 -10   37.40    1.37
  -8   9  -9   33.67    0.56
  -8   9  -8   32.53    0.72
  -8   9  -7   11.62    0.57
  -8   9  -6    6.52    0.35
  -8   9  -5   13.95    0.21
  -8   9  -4   15.52    0.48
  -8   9  -3   48.10    0.80
  -8   9  -2   12.78    0.65
  -8   9  -1    1.10    0.21
  -8   9   0   11.46    0.22
  -8   9   1   49.68    1.08
  -8   9   2    4.59    0.29
  -8   9   3    6.35    0.17
  -8   9   4   14.23    0.45
  -8   9   5    4.28    0.43
  -8   9   6    0.20    0.16
  -8   9   7    3.15    0.26
  -8  10 -15    3.83    0.29
  -8  10 -14    2.42    0.19
  -8  10 -13    0.54    0.29
  -8  10 -12    7.57    0.41
  -8  10 -11    4.71    0.13
  -8  10 -10    0.21    0.27
  -8  10  -9    9.83    0.34
  -8  10  -8    7.47    0.27
  -8  10  -7    0.36    0.24
  -8  10  -6   18.06    0.33
  -8  10  -5   54.94    1.34
  -8  10  -4    0.00    0.19
  -8  10  -3   30.12    0.67
  -8  10  -2   54.40    0.89
  -8  10  -1    7.64    0.65
  -8  10   0    8.23    0.40
  -8  10   1    5.80    0.31
  -8  10   2    4.93    0.27
  -8  10   3    1.74    0.33
  -8  10   4    6.34    0.57
  -8  10   5    1.00    0.39
  -8  10   6    0.01    0.15
  -8  10   7    4.40    0.29
  -8  11 -15    3.52    0.23
  -8  11 -14    0.60    0.10
  -8  11 -13    1.78    0.11
  -8  11 -12    1.37    0.20
  -8  11 -11    4.42    0.19
  -8  11 -10    0.30    0.14
  -8  11  -9    4.16    0.40
  -8  11  -8    0.23    0.17
  -8  11  -7    5.59    0.45
  -8  11  -6   20.81    0.29
  -8  11  -5    8.27    0.50
  -8  11  -4   16.71    0.66
  -8  11  -3    2.60    0.29
  -8  11  -2    5.75    0.55
  -8  11  -1   10.58    0.26
  -8  11   0   43.15    1.98
  -8  11   1    5.53    0.29
  -8  11   2    4.76    0.44
  -8  11   3    1.81    0.22
  -8  11   4    2.85    0.19
  -8  11   5    3.31    0.43
  -8  11   6    0.31    0.13
  -8  11   7    4.94    0.31
  -8  12 -15    0.14    0.14
  -8  12 -14    0.48    0.10
  -8  12 -13    7.55    0.39
  -8  12 -12    1.84    0.10
  -8  12 -11    5.47    0.23
  -8  12 -10    9.37    0.32
  -8  12  -9    1.98    0.18
  -8  12  -8    4.57    0.29
  -8  12  -7    5.87    0.16
  -8  12  -6   14.51    0.76
  -8  12  -5   19.32    1.05
  -8  12  -4   23.07    0.55
  -8  12  -3   16.51    0.87
  -8  12  -2    4.74    0.46
  -8  12  -1    0.88    0.52
  -8  12   0    3.71    0.19
  -8  12   1    1.70    0.34
  -8  12   2    5.50    0.31
  -8  12   3    3.12    0.41
  -8  12   4    0.90    0.14
  -8  12   5    1.24    0.14
  -8  12   6    1.29    0.19
  -8  13 -14    1.92    0.09
  -8  13 -13    3.06    0.19
  -8  13 -12    9.96    0.46
  -8  13 -11    0.96    0.15
  -8  13 -10    5.95    0.23
  -8  13  -9    0.91    0.13
  -8  13  -8    5.55    0.22
  -8  13  -7    3.93    0.24
  -8  13  -6    2.96    0.16
  -8  13  -5    1.28    0.30
  -8  13  -4   57.51    1.70
  -8  13  -3   10.50    0.55
  -8  13  -2    1.88    0.41
  -8  13  -1    7.28    0.29
  -8  13   0    6.47    0.46
  -8  13   1    0.42    0.18
  -8  13   2    0.86    0.26
  -8  13   3    0.26    0.17
  -8  13   4    1.76    0.25
  -8  14 -14    5.56    0.34
  -8  14 -13    3.54    0.11
  -8  14 -12    1.36    0.08
  -8  14 -11    0.25    0.07
  -8  14 -10    1.03    0.09
  -8  14  -9    3.60    0.11
  -8  14  -8    1.52    0.19
  -8  14  -7    7.66    0.32
  -8  14  -6    9.27    0.61
  -8  14  -5   13.80    0.34
  -8  14  -4    2.62    0.23
  -8  14  -3    6.62    0.78
  -8  14  -2   14.88    0.93
  -8  14  -1   10.20    0.42
  -8  14   0    2.71    0.31
  -8  14   1    1.76    0.25
  -8  14   2    0.05    0.13
  -8  14   3    0.07    0.09
  -8  15 -13    0.94    0.16
  -8  15 -12    3.78    0.15
  -8  15 -11    0.15    0.07
  -8  15 -10    0.29    0.07
  -8  15  -9    7.95    0.22
  -8  15  -8   18.11    0.62
  -8  15  -7    6.61    0.22
  -8  15  -6    4.43    0.29
  -8  15  -5    4.53    0.20
  -8  15  -4    4.52    0.17
  -8  15  -3    2.37    0.13
  -8  15  -2    6.54    0.27
  -8  15  -1    0.04    0.12
  -8  15   0    5.96    0.25
  -8  15   1    4.13    0.18
  -8  16 -11    1.61    0.13
  -8  16 -10    2.12    0.10
  -8  16  -9    2.89    0.23
  -8  16  -8    4.75    0.11
  -8  16  -7    8.00    0.26
  -8  16  -6    1.57    0.18
  -8  16  -5    0.53    0.08
  -8  16  -4    0.43    0.07
  -8  16  -3    5.53    0.22
  -8  16  -2    0.03    0.08
  -8  16  -1    1.42    0.09
  -8  17  -9    3.91    0.28
  -8  17  -8    2.21    0.15
  -8  17  -7    2.67    0.13
  -8  17  -6    1.27    0.07
  -8  17  -5    2.55    0.17
  -8  17  -4    1.69    0.13
  -7  -7  -8    0.34    0.13
  -7  -7  -7    0.91    0.19
  -7  -7  -6    0.93    0.24
  -7  -7  -5   18.81    1.12
  -7  -6  -9    0.01    0.12
  -7  -6  -8    2.44    0.23
  -7  -6  -7    5.09    0.42
  -7  -6  -6    0.68    0.19
  -7  -6  -5   14.55    0.83
  -7  -6  -4    7.13    0.43
  -7  -5 -10    0.00    0.12
  -7  -5  -9    2.90    0.27
  -7  -5  -8    5.41    0.45
  -7  -5  -7    8.07    0.39
  -7  -5  -6    7.28    0.34
  -7  -5  -5   12.76    0.52
  -7  -4 -10   12.54    0.51
  -7  -4  -9    1.23    0.23
  -7  -4  -8    6.55    0.56
  -7  -4  -7    9.43    0.43
  -7  -4  -6   45.54    1.96
  -7  -3 -11    6.61    0.45
  -7  -3 -10    7.48    0.53
  -7  -3  -9    6.95    0.49
  -7  -3  -8    1.35    0.25
  -7  -3  -7   28.77    1.46
  -7  -2 -12    3.58    0.29
  -7  -2 -11    6.24    0.37
  -7  -2 -10    2.15    0.27
  -7  -2  -9    6.17    0.46
  -7  -2  -8    3.45    0.50
  -7  -1 -12    4.38    0.39
  -7  -1 -11    4.20    0.42
  -7  -1 -10    0.18    0.20
  -7  -1  -9    5.20    0.53
  -7   0 -13    5.25    0.19
  -7   0 -12    0.08    0.12
  -7   0 -11    4.12    0.19
  -7   0 -10    2.10    0.25
  -7   0  -9    4.32    0.34
  -7   0  -6   23.40    0.91
  -7   0  -5   17.10    0.95
  -7   0  -4   18.36    1.34
  -7   0  -3   12.21    1.08
  -7   0  -2   51.31    2.67
  -7   0  -1   39.66    1.75
  -7   1 -13    7.48    0.36
  -7   1 -12    0.46    0.20
  -7   1 -11    7.16    0.37
  -7   1 -10    6.60    0.28
  -7   1  -9   12.52    0.95
  -7   1  -8    7.54    0.24
  -7   1  -7   76.93    1.51
  -7   1  -6   27.48    1.09
  -7   1  -5   13.86    0.41
  -7   1  -4   46.05    1.78
  -7   1  -3   29.33    0.44
  -7   1  -2    4.77    0.12
  -7   1  -1    8.78    0.25
  -7   1   0   25.86    0.28
  -7   1   1    6.87    0.61
  -7   2 -14    5.47    0.43
  -7   2 -13    3.68    0.19
  -7   2 -12    0.17    0.12
  -7   2 -11   12.93    0.54
  -7   2 -10   14.85    0.56
  -7   2  -9    2.27    0.42
  -7   2  -8   16.25    0.28
  -7   2  -7   53.26    1.45
  -7   2  -6   21.02    0.67
  -7   2  -5    2.98    0.39
  -7   2  -4   27.80    0.64
  -7   2  -3   26.06    2.29
  -7   2  -2   19.15    0.59
  -7   2  -1    7.53    0.31
  -7   2   0   62.93    0.85
  -7   2   1    7.91    0.85
  -7   2   2   13.37    0.26
  -7   3 -14    1.69    0.25
  -7   3 -13    1.90    0.18
  -7   3 -12    2.15    0.42
  -7   3 -11    3.50    0.35
  -7   3 -10    4.08    0.31
  -7   3  -9    1.68    0.26
  -7   3  -8    2.88    0.18
  -7   3  -7   15.37    0.79
  -7   3  -6   73.88    2.33
  -7   3  -5   22.45    1.04
  -7   3  -4   91.12    3.88
  -7   3  -3   12.63    1.21
  -7   3  -2   90.99    3.74
  -7   3  -1   10.76    0.42
  -7   3   0   23.64    0.32
  -7   3   1   44.93    1.63
  -7   3   2   35.76    2.18
  -7   3   3    5.19    0.68
  -7   4 -15    4.04    0.22
  -7   4 -14    1.18    0.11
  -7   4 -13    3.40    0.27
  -7   4 -12    4.14    0.30
  -7   4 -11   21.52    1.47
  -7   4 -10   17.57    0.38
  -7   4  -9   11.29    0.23
  -7   4  -8   53.30    1.62
  -7   4  -7   10.65    0.27
  -7   4  -6    1.29    0.15
  -7   4  -5   15.66    0.21
  -7   4  -4   11.56    0.68
  -7   4  -3    5.88    0.22
  -7   4  -2   18.77    0.32
  -7   4  -1   71.34    2.35
  -7   4   0    5.87    0.33
  -7   4   1   32.92    0.44
  -7   4   2   19.53    1.07
  -7   4   3   15.92    0.94
  -7   4   4   25.17    1.35
  -7   5 -15    3.35    0.22
  -7   5 -14   10.16    0.58
  -7   5 -13    3.79    0.24
  -7   5 -12    0.11    0.11
  -7   5 -11   13.11    0.54
  -7   5 -10   38.71    0.79
  -7   5  -9    5.38    0.16
  -7   5  -8   27.97    0.48
  -7   5  -7    6.48    0.23
  -7   5  -6   56.86    1.79
  -7   5  -5    9.95    0.38
  -7   5  -4   56.27    1.21
  -7   5  -3   70.00    2.14
  -7   5  -2    9.18    1.21
  -7   5  -1   51.40    0.92
  -7   5   0   21.45    0.41
  -7   5   1    0.91    0.26
  -7   5   2   40.95    1.91
  -7   5   3    2.24    0.34
  -7   5   4   12.13    0.99
  -7   5   5    9.96    0.21
  -7   6 -15    0.56    0.15
  -7   6 -14    9.38    0.41
  -7   6 -13    0.81    0.36
  -7   6 -12    1.56    0.17
  -7   6 -11   34.11    1.08
  -7   6 -10   28.61    0.66
  -7   6  -9    2.48    0.44
  -7   6  -8    6.59    0.59
  -7   6  -7    9.79    0.22
  -7   6  -6   20.56    0.78
  -7   6  -5   12.01    0.54
  -7   6  -4   19.60    1.04
  -7   6  -3    2.63    0.17
  -7   6  -2    0.55    0.43
  -7   6  -1  102.50    4.45
  -7   6   0   10.74    0.29
  -7   6   1   59.50    1.80
  -7   6   2    9.12    0.17
  -7   6   3   29.65    1.51
  -7   6   4   32.84    0.84
  -7   6   5    3.31    0.28
  -7   7 -15    1.79    0.19
  -7   7 -14    3.12    0.25
  -7   7 -13    3.71    0.34
  -7   7 -12   18.89    1.25
  -7   7 -11    0.00    0.12
  -7   7 -10    4.13    0.39
  -7   7  -9   21.29    0.60
  -7   7  -8    0.37    0.24
  -7   7  -7    3.33    0.23
  -7   7  -6    0.72    0.15
  -7   7  -5    5.17    0.23
  -7   7  -4    6.11    0.68
  -7   7  -3   14.06    0.88
  -7   7  -2   12.06    0.32
  -7   7  -1   10.79    0.58
  -7   7   0    2.90    0.73
  -7   7   1    3.04    0.12
  -7   7   2   18.30    0.48
  -7   7   3    8.48    0.10
  -7   7   4   11.45    0.29
  -7   7   5   14.21    0.47
  -7   8 -15    4.35    0.29
  -7   8 -14    2.37    0.19
  -7   8 -13    0.87    0.26
  -7   8 -12   62.41    1.51
  -7   8 -11   15.98    0.53
  -7   8 -10   25.80    0.98
  -7   8  -9   22.10    0.46
  -7   8  -8   14.48    0.61
  -7   8  -7    9.80    0.23
  -7   8  -6   33.78    1.01
  -7   8  -5    8.20    0.41
  -7   8  -4   23.97    0.85
  -7   8  -3    9.45    0.14
  -7   8  -2    7.43    0.43
  -7   8  -1    0.64    0.24
  -7   8   0    7.07    0.81
  -7   8   1    7.29    0.34
  -7   8   2   37.47    1.36
  -7   8   3   19.09    0.32
  -7   8   4    4.91    0.36
  -7   8   5    6.17    0.80
  -7   8   6    0.30    0.19
  -7   8   7    1.87    0.26
  -7   9 -15    8.24    0.45
  -7   9 -14    4.59    0.22
  -7   9 -13    0.12    0.18
  -7   9 -12    5.36    0.34
  -7   9 -11    5.22    0.36
  -7   9 -10    5.21    0.63
  -7   9  -9   22.06    0.23
  -7   9  -8    6.56    0.32
  -7   9  -7    3.51    0.19
  -7   9  -6   13.18    0.30
  -7   9  -5   11.86    0.37
  -7   9  -4    1.59    0.37
  -7   9  -3   12.62    0.98
  -7   9  -2    3.54    0.18
  -7   9  -1    3.81    0.39
  -7   9   0   27.42    0.81
  -7   9   1   24.60    0.47
  -7   9   2   15.61    0.76
  -7   9   3   39.21    1.35
  -7   9   4    2.22    0.16
  -7   9   5    6.30    0.55
  -7   9   6   10.15    0.39
  -7   9   7    2.32    0.26
  -7   9   8    0.49    0.15
  -7  10 -15    0.45    0.11
  -7  10 -14    3.03    0.13
  -7  10 -13   13.57    0.44
  -7  10 -12    7.92    0.39
  -7  10 -11   11.00    0.30
  -7  10 -10   21.95    0.46
  -7  10  -9   10.78    0.55
  -7  10  -8   26.52    0.57
  -7  10  -7   16.35    0.43
  -7  10  -6    0.01    0.09
  -7  10  -5    3.29    0.26
  -7  10  -4   12.25    0.33
  -7  10  -3   18.21    1.10
  -7  10  -2    3.26    0.16
  -7  10  -1    2.91    0.27
  -7  10   0    0.31    0.19
  -7  10   1    5.06    0.16
  -7  10   2    7.79    0.20
  -7  10   3    7.43    0.34
  -7  10   4    1.05    0.22
  -7  10   5    1.84    0.22
  -7  10   6    6.99    0.60
  -7  10   7    0.46    0.15
  -7  10   8    1.04    0.16
  -7  11 -15    4.01    0.34
  -7  11 -14    2.43    0.27
  -7  11 -13    7.06    0.27
  -7  11 -12    3.92    0.12
  -7  11 -11   14.28    0.53
  -7  11 -10    7.56    0.20
  -7  11  -9   25.52    1.57
  -7  11  -8    8.23    0.27
  -7  11  -7   59.83    0.94
  -7  11  -6   13.33    0.19
  -7  11  -5   28.11    0.84
  -7  11  -4   24.15    0.46
  -7  11  -3   18.85    0.41
  -7  11  -2    8.83    0.36
  -7  11  -1   21.60    0.63
  -7  11   0    2.90    0.31
  -7  11   1    7.90    0.86
  -7  11   2    5.60    0.30
  -7  11   3    1.74    0.26
  -7  11   4    3.63    0.41
  -7  11   5    0.06    0.27
  -7  11   6   15.52    0.82
  -7  11   7    4.75    0.35
  -7  12 -15    3.50    0.11
  -7  12 -14    1.35    0.15
  -7  12 -13    2.13    0.13
  -7  12 -12    0.68    0.09
  -7  12 -11    0.31    0.20
  -7  12 -10   23.77    0.66
  -7  12  -9   18.73    0.51
  -7  12  -8    3.95    0.20
  -7  12  -7   11.41    0.32
  -7  12  -6    4.12    0.09
  -7  12  -5   15.09    0.38
  -7  12  -4    0.60    0.16
  -7  12  -3   10.02    0.54
  -7  12  -2    0.68    0.17
  -7  12  -1   26.87    1.02
  -7  12   0   18.52    0.53
  -7  12   1   17.74    0.93
  -7  12   2    0.18    0.22
  -7  12   3    2.47    0.32
  -7  12   4    4.66    0.25
  -7  12   5    4.73    0.41
  -7  12   6    3.82    0.20
  -7  13 -15    0.39    0.11
  -7  13 -14    4.97    0.14
  -7  13 -13    1.32    0.14
  -7  13 -12    5.44    0.25
  -7  13 -11    1.42    0.08
  -7  13 -10    9.59    0.29
  -7  13  -9    4.48    0.23
  -7  13  -8    4.03    0.20
  -7  13  -7    6.24    0.31
  -7  13  -6    5.66    0.17
  -7  13  -5   10.13    0.86
  -7  13  -4    0.91    0.20
  -7  13  -3    3.12    0.27
  -7  13  -2   10.73    0.49
  -7  13  -1    0.85    0.19
  -7  13   0    3.16    0.40
  -7  13   1    5.97    0.19
  -7  13   2    6.49    0.46
  -7  13   3    0.22    0.16
  -7  13   4    0.24    0.17
  -7  13   5    2.50    0.12
  -7  14 -14    5.84    0.24
  -7  14 -13    0.99    0.07
  -7  14 -12    2.38    0.11
  -7  14 -11    3.21    0.39
  -7  14 -10    1.06    0.11
  -7  14  -9    1.13    0.09
  -7  14  -8    9.18    0.24
  -7  14  -7    0.36    0.14
  -7  14  -6    0.48    0.10
  -7  14  -5   19.04    0.58
  -7  14  -4    6.97    0.20
  -7  14  -3    2.06    0.09
  -7  14  -2    7.16    0.44
  -7  14  -1    3.93    0.36
  -7  14   0   10.66    0.51
  -7  14   1    5.45    0.37
  -7  14   2    4.89    0.19
  -7  14   3    3.13    0.16
  -7  15 -14    1.13    0.12
  -7  15 -13    5.50    0.17
  -7  15 -12    2.62    0.15
  -7  15 -11    2.29    0.22
  -7  15 -10   11.17    0.25
  -7  15  -9    1.47    0.18
  -7  15  -8   13.80    0.44
  -7  15  -7   14.07    0.27
  -7  15  -6    4.98    0.19
  -7  15  -5    0.01    0.08
  -7  15  -4    3.52    0.20
  -7  15  -3    6.43    0.22
  -7  15  -2    5.65    0.29
  -7  15  -1    8.98    0.24
  -7  15   0    1.60    0.19
  -7  15   1    0.33    0.09
  -7  16 -13    7.70    0.24
  -7  16 -12    2.14    0.13
  -7  16 -11    0.34    0.09
  -7  16 -10    1.12    0.07
  -7  16  -9    0.30    0.12
  -7  16  -8    0.56    0.08
  -7  16  -7    3.32    0.24
  -7  16  -6    1.72    0.10
  -7  16  -5    0.40    0.13
  -7  16  -4    0.16    0.08
  -7  16  -3    3.71    0.26
  -7  16  -2    3.69    0.23
  -7  16  -1    1.03    0.16
  -7  17 -11    2.32    0.12
  -7  17 -10   12.69    0.59
  -7  17  -9    1.30    0.10
  -7  17  -8    3.11    0.48
  -7  17  -7    2.16    0.39
  -7  17  -6    0.07    0.07
  -7  17  -5    1.38    0.12
  -7  17  -4    1.82    0.07
  -7  17  -3    4.09    0.24
  -6  -7  -8    3.38    0.35
  -6  -7  -7    0.13    0.19
  -6  -7  -6    6.83    0.45
  -6  -7  -5   10.22    0.42
  -6  -6  -9    1.39    0.21
  -6  -6  -8    1.53    0.25
  -6  -6  -7    3.74    0.37
  -6  -6  -6   27.85    1.14
  -6  -6  -5   28.49    1.35
  -6  -6  -4   10.65    0.28
  -6  -5 -10    0.25    0.14
  -6  -5  -9    0.29    0.15
  -6  -5  -8    1.44    0.20
  -6  -5  -7    9.59    0.67
  -6  -5  -6   23.01    0.93
  -6  -5  -5    5.67    0.43
  -6  -4 -11    1.38    0.24
  -6  -4 -10    1.00    0.21
  -6  -4  -9    6.65    0.45
  -6  -4  -8   11.45    0.84
  -6  -4  -7    0.97    0.37
  -6  -4  -6   12.68    0.61
  -6  -3 -12   11.05    0.55
  -6  -3 -11    7.22    0.38
  -6  -3 -10    5.24    0.62
  -6  -3  -9   18.98    0.93
  -6  -3  -8   17.16    0.65
  -6  -3  -7    7.73    0.66
  -6  -2 -12    7.69    0.47
  -6  -2 -11    4.35    0.25
  -6  -2 -10    6.95    0.60
  -6  -2  -9    1.66    0.39
  -6  -2  -8    3.26    0.40
  -6  -1 -13    4.31    0.32
  -6  -1 -12    0.26    0.11
  -6  -1 -11    0.91    0.25
  -6  -1 -10    6.38    0.20
  -6  -1  -9   29.35    0.99
  -6  -1  -6   14.63    1.21
  -6  -1  -5   14.42    1.17
  -6  -1  -4    0.30    0.28
  -6  -1  -3    0.84    0.73
  -6  -1  -2    7.33    0.76
  -6  -1  -1  227.20    5.42
  -6   0 -13    4.78    0.23
  -6   0 -12    2.09    0.14
  -6   0 -11    0.59    0.38
  -6   0 -10    0.87    0.32
  -6   0  -9    3.71    0.25
  -6   0  -8   10.44    0.21
  -6   0  -7   43.51    1.31
  -6   0  -6   15.13    0.27
  -6   0  -5   11.84    0.49
  -6   0  -4   10.04    0.89
  -6   0  -3    9.88    0.65
  -6   0  -2   49.89    0.66
  -6   0  -1   41.79    0.85
  -6   0   0   36.46    0.36
  -6   0   1    5.64    0.33
  -6   1 -14    2.41    0.14
  -6   1 -13    1.63    0.16
  -6   1 -12    0.71    0.15
  -6   1 -11    1.34    0.19
  -6   1 -10    3.34    0.19
  -6   1  -9   74.74    2.91
  -6   1  -8   10.02    0.53
  -6   1  -7    9.34    0.43
  -6   1  -6   39.38    1.32
  -6   1  -5   43.11    2.90
  -6   1  -4    2.88    0.16
  -6   1  -3   18.32    0.40
  -6   1  -2   49.15    1.12
  -6   1  -1  101.17    4.35
  -6   1   0   33.24    1.03
  -6   1   1    1.22    1.01
  -6   1   2   72.25    0.50
  -6   1   3  253.37    8.45
  -6   2 -14    0.21    0.12
  -6   2 -13    0.63    0.13
  -6   2 -12    4.46    0.21
  -6   2 -11    1.04    0.14
  -6   2 -10   27.29    0.89
  -6   2  -9    3.29    0.22
  -6   2  -8   11.71    0.24
  -6   2  -7    1.63    0.15
  -6   2  -6    4.90    0.30
  -6   2  -5    3.77    0.25
  -6   2  -4   37.61    1.07
  -6   2  -3   90.28    2.73
  -6   2  -2   26.46    0.85
  -6   2  -1    2.26    0.16
  -6   2   0  111.98    4.55
  -6   2   1   36.90    4.51
  -6   2   2    0.04    1.15
  -6   2   3   13.00    0.63
  -6   2   4  363.61    8.40
  -6   3 -15    0.08    0.08
  -6   3 -14    0.38    0.11
  -6   3 -13    0.64    0.14
  -6   3 -12    3.07    0.31
  -6   3 -11    5.64    0.17
  -6   3 -10   17.57    0.47
  -6   3  -9    3.24    0.19
  -6   3  -8    1.14    0.11
  -6   3  -7    0.24    0.26
  -6   3  -6   16.73    0.86
  -6   3  -5   15.48    1.37
  -6   3  -4   27.18    0.37
  -6   3  -3    3.70    0.57
  -6   3  -2   88.82    1.65
  -6   3  -1   29.04    1.62
  -6   3   0   62.80    1.32
  -6   3   1   11.05    0.94
  -6   3   2   38.90    1.78
  -6   3   3   12.61    0.29
  -6   3   4   53.49    2.42
  -6   3   5    1.46    0.17
  -6   4 -15    1.06    0.16
  -6   4 -14    0.01    0.11
  -6   4 -13    0.58    0.13
  -6   4 -12   12.72    0.49
  -6   4 -11   24.85    1.45
  -6   4 -10   11.94    0.20
  -6   4  -9   51.12    0.92
  -6   4  -8    5.34    0.11
  -6   4  -7    0.39    0.12
  -6   4  -6    1.22    0.22
  -6   4  -5   17.14    1.79
  -6   4  -4   34.46    1.46
  -6   4  -3   27.88    2.32
  -6   4  -2    4.45    1.22
  -6   4  -1   15.02    0.42
  -6   4   0   10.38    0.90
  -6   4   1   11.20    0.31
  -6   4   2   14.70    0.27
  -6   4   3   21.69    0.41
  -6   4   4    1.43    0.15
  -6   4   5   17.41    1.20
  -6   5 -15    2.64    0.17
  -6   5 -14    8.49    0.56
  -6   5 -13    3.81    0.21
  -6   5 -12    4.38    0.26
  -6   5 -11   15.31    0.51
  -6   5 -10   60.82    1.60
  -6   5  -9    8.47    0.32
  -6   5  -8    1.34    0.10
  -6   5  -7    0.71    0.39
  -6   5  -6   32.03    1.38
  -6   5  -5   27.79    0.28
  -6   5  -4    5.74    0.23
  -6   5  -3   31.09    1.18
  -6   5  -2    0.68    1.04
  -6   5  -1  154.34    7.63
  -6   5   0   16.46    0.19
  -6   5   1   61.50    1.57
  -6   5   2   36.96    1.12
  -6   5   3    2.70    0.25
  -6   5   4    5.31    0.49
  -6   5   5    0.04    0.28
  -6   6 -15    3.51    0.18
  -6   6 -14    3.39    0.25
  -6   6 -13   17.69    0.96
  -6   6 -12   16.47    0.69
  -6   6 -11   17.06    0.34
  -6   6 -10    4.66    0.17
  -6   6  -9    0.12    0.16
  -6   6  -8    4.26    0.23
  -6   6  -7   12.96    0.13
  -6   6  -6    4.05    0.63
  -6   6  -5   11.46    0.49
  -6   6  -4   26.23    1.07
  -6   6  -3   20.88    1.00
  -6   6  -2   12.88    0.30
  -6   6  -1   21.05    1.81
  -6   6   0   32.80    2.38
  -6   6   1   30.41    0.78
  -6   6   2   48.79    2.97
  -6   6   3    9.68    0.33
  -6   6   4    9.26    0.28
  -6   6   5    2.61    0.31
  -6   6   6    0.36    0.18
  -6   7 -16    2.11    0.16
  -6   7 -15    2.59    0.36
  -6   7 -14    0.36    0.14
  -6   7 -13    5.48    0.21
  -6   7 -12    1.20    0.14
  -6   7 -11   18.35    0.42
  -6   7 -10    0.47    0.19
  -6   7  -9    4.60    0.46
  -6   7  -8    0.62    0.09
  -6   7  -7   25.78    0.63
  -6   7  -6   33.57    3.23
  -6   7  -5   40.36    0.88
  -6   7  -4   24.19    1.08
  -6   7  -3   13.70    0.72
  -6   7  -2   21.14    1.25
  -6   7  -1   20.37    0.23
  -6   7   0   45.89    3.24
  -6   7   1   57.77    2.25
  -6   7   2    6.42    0.83
  -6   7   3    9.33    0.68
  -6   7   4    1.67    0.11
  -6   7   5    8.78    0.34
  -6   7   6    8.39    0.41
  -6   7   7   14.41    0.69
  -6   8 -16    0.38    0.12
  -6   8 -15    4.84    0.43
  -6   8 -14    6.40    0.41
  -6   8 -13    0.78    0.16
  -6   8 -12    6.48    0.21
  -6   8 -11   33.75    1.41
  -6   8 -10    3.51    0.13
  -6   8  -9    2.24    0.16
  -6   8  -8    6.34    0.17
  -6   8  -7   26.75    0.67
  -6   8  -6   39.71    2.45
  -6   8  -5   52.62    2.66
  -6   8  -4   16.45    0.78
  -6   8  -3    6.86    0.40
  -6   8  -2    2.72    0.57
  -6   8  -1   13.96    0.37
  -6   8   0    1.95    0.45
  -6   8   1    1.79    0.15
  -6   8   2   19.77    0.38
  -6   8   3    4.78    0.21
  -6   8   4    5.66    0.44
  -6   8   5   17.80    0.48
  -6   8   6    8.62    0.56
  -6   8   7   32.17    1.06
  -6   8   8   12.38    0.54
  -6   9 -16    2.37    0.16
  -6   9 -15    8.26    0.25
  -6   9 -14    6.70    0.18
  -6   9 -13    2.40    0.18
  -6   9 -12   16.03    0.42
  -6   9 -11   12.58    0.38
  -6   9 -10    0.67    0.09
  -6   9  -9    2.88    0.17
  -6   9  -8   26.99    0.56
  -6   9  -7    1.46    0.07
  -6   9  -6   87.67    1.01
  -6   9  -5    4.94    0.17
  -6   9  -4    3.26    0.13
  -6   9  -3    1.83    0.14
  -6   9  -2    7.85    0.21
  -6   9  -1    0.62    0.26
  -6   9   0   14.12    0.58
  -6   9   1    3.09    0.18
  -6   9   2   15.25    0.57
  -6   9   3    9.24    0.68
  -6   9   4   35.11    1.19
  -6   9   5    3.79    0.47
  -6   9   6    6.94    0.36
  -6   9   7    3.25    0.33
  -6   9   8    1.69    0.20
  -6  10 -16    2.81    0.15
  -6  10 -15    1.69    0.11
  -6  10 -14    8.39    0.42
  -6  10 -13    6.57    0.27
  -6  10 -12    3.65    0.12
  -6  10 -11    3.12    0.19
  -6  10 -10    8.29    0.29
  -6  10  -9    2.20    0.08
  -6  10  -8    8.47    0.15
  -6  10  -7    5.62    0.17
  -6  10  -6   13.86    0.37
  -6  10  -5   25.88    0.41
  -6  10  -4    0.89    0.19
  -6  10  -3    1.96    0.13
  -6  10  -2   22.81    0.41
  -6  10  -1   27.57    0.91
  -6  10   0    8.43    0.23
  -6  10   1    0.09    0.19
  -6  10   2    4.40    0.28
  -6  10   3   18.02    0.44
  -6  10   4    4.38    0.24
  -6  10   5    2.47    0.22
  -6  10   6    1.37    0.26
  -6  10   7   22.70    0.95
  -6  10   8    2.05    0.19
  -6  11 -16    2.12    0.14
  -6  11 -15    7.15    0.23
  -6  11 -14    5.38    0.17
  -6  11 -13    3.97    0.21
  -6  11 -12    9.11    0.42
  -6  11 -11   14.03    0.25
  -6  11 -10    5.96    0.16
  -6  11  -9   13.51    0.27
  -6  11  -8   14.38    0.22
  -6  11  -7    4.49    0.20
  -6  11  -6    2.85    0.11
  -6  11  -5    2.16    0.08
  -6  11  -4   22.69    0.41
  -6  11  -3    4.53    0.19
  -6  11  -2    2.34    0.19
  -6  11  -1    7.01    0.33
  -6  11   0    0.61    0.19
  -6  11   1    4.89    0.66
  -6  11   2    1.33    0.19
  -6  11   3    2.55    0.32
  -6  11   4    3.66    0.33
  -6  11   5    3.60    0.24
  -6  11   6    0.15    0.16
  -6  11   7    0.41    0.16
  -6  12 -16    0.37    0.12
  -6  12 -15    0.91    0.12
  -6  12 -14    2.08    0.12
  -6  12 -13    3.37    0.11
  -6  12 -12    3.01    0.15
  -6  12 -11    2.50    0.19
  -6  12 -10   13.86    0.30
  -6  12  -9    4.08    0.15
  -6  12  -8   17.13    0.35
  -6  12  -7   43.09    0.80
  -6  12  -6    1.22    0.17
  -6  12  -5   17.39    0.46
  -6  12  -4   15.79    0.45
  -6  12  -3    2.27    0.17
  -6  12  -2   18.23    0.59
  -6  12  -1   24.01    0.75
  -6  12   0    3.08    0.24
  -6  12   1    1.32    0.22
  -6  12   2    5.07    0.32
  -6  12   3    1.61    0.31
  -6  12   4    0.04    0.14
  -6  12   5    0.36    0.16
  -6  12   6    0.27    0.11
  -6  13 -15    6.64    0.19
  -6  13 -14    2.26    0.09
  -6  13 -13    9.84    0.27
  -6  13 -12    4.84    0.20
  -6  13 -11    1.02    0.20
  -6  13 -10   15.27    0.45
  -6  13  -9   16.90    0.39
  -6  13  -8    2.19    0.21
  -6  13  -7   16.18    0.63
  -6  13  -6    1.90    0.19
  -6  13  -5   56.88    1.57
  -6  13  -4   65.44    2.99
  -6  13  -3    6.54    0.16
  -6  13  -2    3.05    0.29
  -6  13  -1   12.53    0.72
  -6  13   0    4.81    0.37
  -6  13   1    0.37    0.23
  -6  13   2    2.24    0.24
  -6  13   3    8.02    0.31
  -6  13   4    2.61    0.27
  -6  13   5    3.51    0.17
  -6  14 -15    3.02    0.13
  -6  14 -14   15.36    0.47
  -6  14 -13    1.28    0.08
  -6  14 -12    4.42    0.16
  -6  14 -11    2.38    0.35
  -6  14 -10    2.65    0.23
  -6  14  -9   11.28    0.44
  -6  14  -8   14.40    0.49
  -6  14  -7    0.67    0.23
  -6  14  -6    7.70    0.31
  -6  14  -5   22.61    0.38
  -6  14  -4    8.96    0.26
  -6  14  -3    4.05    0.21
  -6  14  -2    8.00    0.48
  -6  14  -1    0.26    0.33
  -6  14   0    0.75    0.23
  -6  14   1   10.52    0.53
  -6  14   2    6.74    0.24
  -6  14   3    0.32    0.12
  -6  15 -14    3.34    0.21
  -6  15 -13    2.53    0.29
  -6  15 -12    0.31    0.18
  -6  15 -11   11.94    0.35
  -6  15 -10    1.04    0.14
  -6  15  -9    0.19    0.09
  -6  15  -8    7.71    0.27
  -6  15  -7    4.11    0.26
  -6  15  -6    1.79    0.26
  -6  15  -5    8.07    0.23
  -6  15  -4    4.49    0.20
  -6  15  -3    3.71    0.19
  -6  15  -2    6.88    0.15
  -6  15  -1    4.34    0.12
  -6  15   0    3.29    0.22
  -6  15   1   12.18    0.40
  -6  15   2    2.51    0.15
  -6  16 -13    0.54    0.08
  -6  16 -12    0.38    0.20
  -6  16 -11    3.93    0.19
  -6  16 -10    3.09    0.20
  -6  16  -9   13.80    1.00
  -6  16  -8    4.62    0.31
  -6  16  -7    1.00    0.22
  -6  16  -6    1.07    0.19
  -6  16  -5    9.54    0.27
  -6  16  -4    7.02    0.27
  -6  16  -3    2.63    0.16
  -6  16  -2    1.04    0.13
  -6  16  -1    3.13    0.32
  -6  16   0    4.33    0.22
  -6  17 -12    0.38    0.11
  -6  17 -11    1.54    0.10
  -6  17 -10    0.15    0.09
  -6  17  -9   17.32    0.60
  -6  17  -8    4.32    0.21
  -6  17  -7    2.74    0.17
  -6  17  -6    4.08    0.19
  -6  17  -5    2.12    0.21
  -6  17  -4    4.15    0.16
  -6  17  -3    0.28    0.05
  -6  18  -8    7.05    0.35
  -5  -7  -9    0.50    0.14
  -5  -7  -8    2.12    0.24
  -5  -7  -7   15.09    0.92
  -5  -7  -6    2.61    0.19
  -5  -7  -5    5.36    0.45
  -5  -6 -10    0.29    0.13
  -5  -6  -9    3.85    0.38
  -5  -6  -8    2.57    0.23
  -5  -6  -7    5.26    0.34
  -5  -6  -6    2.11    0.20
  -5  -6  -5    4.01    0.40
  -5  -6  -4   32.13    1.83
  -5  -5 -11    0.77    0.17
  -5  -5 -10    1.56    0.24
  -5  -5  -9    1.00    0.20
  -5  -5  -8    7.15    0.50
  -5  -5  -7   14.78    0.70
  -5  -5  -6    1.07    0.29
  -5  -5  -5    1.04    0.20
  -5  -4 -11    0.09    0.17
  -5  -4 -10    1.33    0.24
  -5  -4  -9    3.05    0.47
  -5  -4  -8   21.50    0.76
  -5  -4  -7    3.49    0.39
  -5  -4  -6   19.29    0.98
  -5  -3 -12    0.62    0.21
  -5  -3 -11    7.17    0.40
  -5  -3 -10    8.18    0.49
  -5  -3  -9    0.16    0.22
  -5  -3  -8   41.15    2.01
  -5  -3  -7    0.99    0.27
  -5  -2 -13    2.02    0.23
  -5  -2 -12    8.67    0.43
  -5  -2 -11    0.00    0.21
  -5  -2 -10    3.71    0.35
  -5  -2  -9   11.23    0.53
  -5  -2  -8   29.58    0.98
  -5  -2  -5    5.48    0.31
  -5  -2  -4   50.57    1.58
  -5  -2  -3    8.19    0.39
  -5  -2  -2   13.29    0.83
  -5  -1 -13    0.41    0.12
  -5  -1 -12   19.27    0.67
  -5  -1 -11    0.37    0.16
  -5  -1 -10    9.00    0.59
  -5  -1  -9    6.77    0.31
  -5  -1  -8    6.36    0.32
  -5  -1  -7   46.84    1.30
  -5  -1  -6    2.59    0.34
  -5  -1  -5    6.34    0.16
  -5  -1  -4   39.63    1.26
  -5  -1  -3    0.38    0.17
  -5  -1  -2    8.67    0.20
  -5  -1  -1   72.25    2.82
  -5  -1   0   13.40    0.31
  -5   0 -14    3.61    0.33
  -5   0 -13    3.47    0.16
  -5   0 -12    0.91    0.20
  -5   0 -11    4.71    0.19
  -5   0 -10   13.77    0.44
  -5   0  -9   13.24    0.46
  -5   0  -8   11.36    0.71
  -5   0  -7   11.72    0.26
  -5   0  -6   76.08    2.83
  -5   0  -5   45.90    1.44
  -5   0  -4    6.96    0.35
  -5   0  -3   15.47    0.28
  -5   0  -2   23.77    0.42
  -5   0  -1   55.32    0.50
  -5   0   0   17.12    0.34
  -5   0   1    7.75    0.11
  -5   0   2   18.38    0.51
  -5   0   3   48.77    1.69
  -5   1 -14    1.15    0.24
  -5   1 -13    1.60    0.20
  -5   1 -12   14.69    0.47
  -5   1 -11    0.17    0.19
  -5   1 -10    0.36    0.11
  -5   1  -9   28.85    0.47
  -5   1  -8    6.32    0.58
  -5   1  -7   40.58    1.85
  -5   1  -6   24.79    0.44
  -5   1  -5   71.61    2.00
  -5   1  -4   25.09    0.50
  -5   1  -3   74.79    2.05
  -5   1  -2   25.42    1.87
  -5   1  -1   19.62    0.87
  -5   1   0   19.56    0.16
  -5   1   1    1.71    0.89
  -5   1   2   44.40    2.83
  -5   1   3   22.99    0.16
  -5   1   4    7.95    1.16
  -5   2 -15    1.93    0.14
  -5   2 -14    7.70    0.49
  -5   2 -13    3.41    0.37
  -5   2 -12    3.58    0.19
  -5   2 -11   29.79    0.73
  -5   2 -10    3.42    0.14
  -5   2  -9   12.67    0.39
  -5   2  -8    0.49    0.26
  -5   2  -7   11.92    1.06
  -5   2  -6   26.01    0.56
  -5   2  -5   11.91    0.75
  -5   2  -4   10.76    0.75
  -5   2  -3   30.66    1.94
  -5   2  -2   12.30    0.43
  -5   2  -1    9.62    1.24
  -5   2   0   19.01    0.32
  -5   2   1   43.77    0.26
  -5   2   2   14.54    0.50
  -5   2   3   87.72    5.78
  -5   2   4   36.89    0.80
  -5   2   5    4.21    0.37
  -5   3 -15    1.18    0.12
  -5   3 -14    2.97    0.19
  -5   3 -13    7.42    0.51
  -5   3 -12   10.59    0.65
  -5   3 -11    6.02    0.31
  -5   3 -10    1.18    0.16
  -5   3  -9   10.84    0.46
  -5   3  -8    3.52    0.12
  -5   3  -7    5.51    0.32
  -5   3  -6    9.99    0.38
  -5   3  -5   64.90    1.11
  -5   3  -4   57.09    3.59
  -5   3  -3   23.21    3.25
  -5   3  -2   20.00    0.65
  -5   3  -1   56.35    1.78
  -5   3   0    0.59    0.23
  -5   3   1   15.92    0.41
  -5   3   2   13.57    0.11
  -5   3   3    2.57    1.67
  -5   3   4   16.47    0.49
  -5   3   5    5.72    0.31
  -5   3   6   14.34    1.07
  -5   4 -16    0.22    0.12
  -5   4 -15    0.44    0.16
  -5   4 -14    5.46    0.31
  -5   4 -13   10.83    0.34
  -5   4 -12    9.17    0.27
  -5   4 -11   14.88    0.56
  -5   4 -10    5.84    0.32
  -5   4  -9    1.21    0.13
  -5   4  -8    5.09    0.55
  -5   4  -7   15.68    0.65
  -5   4  -6    2.92    0.24
  -5   4  -5   11.11    0.88
  -5   4  -4   87.07    1.13
  -5   4  -3   19.15    2.54
  -5   4  -2   11.92    1.54
  -5   4  -1   21.17    1.26
  -5   4   0   25.80    0.27
  -5   4   1   58.95    2.15
  -5   4   2    9.19    0.74
  -5   4   3   14.12    1.78
  -5   4   4    3.16    0.46
  -5   4   5   16.16    0.96
  -5   4   6    0.66    0.32
  -5   5 -16    4.18    0.29
  -5   5 -15    1.66    0.18
  -5   5 -14    2.19    0.19
  -5   5 -13    0.60    0.35
  -5   5 -12    2.15    0.15
  -5   5 -11   20.92    0.40
  -5   5 -10    1.81    0.36
  -5   5  -9    4.35    0.48
  -5   5  -8    0.14    0.27
  -5   5  -7    3.69    0.26
  -5   5  -6   30.73    0.86
  -5   5  -5   24.91    1.02
  -5   5  -4    2.83    0.13
  -5   5  -3    1.46    0.88
  -5   5  -2    0.57    0.50
  -5   5  -1   47.96    3.13
  -5   5   0   35.58    3.50
  -5   5   1    8.57    0.60
  -5   5   2   35.95    0.98
  -5   5   3   26.79    0.53
  -5   5   4    7.91    0.89
  -5   5   5   18.41    0.51
  -5   5   6    0.99    0.31
  -5   6 -16    2.77    0.23
  -5   6 -15    1.74    0.29
  -5   6 -14    0.90    0.29
  -5   6 -13    1.10    0.18
  -5   6 -12   12.12    0.52
  -5   6 -11   37.03    0.82
  -5   6 -10    4.37    0.18
  -5   6  -9    0.16    0.22
  -5   6  -8    2.62    0.43
  -5   6  -7   28.86    0.73
  -5   6  -6   45.95    2.19
  -5   6  -5   35.72    1.61
  -5   6  -4   30.00    1.02
  -5   6  -3    1.92    0.25
  -5   6  -2   16.96    0.28
  -5   6  -1   43.30    1.06
  -5   6   0   10.28    0.51
  -5   6   1   13.09    1.08
  -5   6   2   33.03    1.50
  -5   6   3    7.16    0.23
  -5   6   4    2.09    0.18
  -5   6   5   27.17    0.76
  -5   6   6    5.05    0.18
  -5   6   7    1.50    0.17
  -5   7 -16   14.01    0.59
  -5   7 -15    9.54    0.63
  -5   7 -14   18.05    0.84
  -5   7 -13    2.15    0.23
  -5   7 -12    2.31    0.17
  -5   7 -11   23.16    0.52
  -5   7 -10    8.08    0.24
  -5   7  -9    4.35    0.09
  -5   7  -8   25.59    0.22
  -5   7  -7   24.09    1.08
  -5   7  -6   17.10    0.27
  -5   7  -5   54.34    2.08
  -5   7  -4    6.00    0.08
  -5   7  -3    3.34    0.30
  -5   7  -2    4.85    0.46
  -5   7  -1   12.03    0.69
  -5   7   0   24.12    0.20
  -5   7   1    1.79    0.24
  -5   7   2    0.64    0.26
  -5   7   3    6.27    0.34
  -5   7   4    1.78    0.10
  -5   7   5   18.09    0.91
  -5   7   6   31.68    1.05
  -5   7   7    5.30    0.33
  -5   7   8   34.72    1.23
  -5   8 -16    0.50    0.10
  -5   8 -15    8.90    0.22
  -5   8 -14    0.98    0.09
  -5   8 -13   16.39    0.35
  -5   8 -12   15.23    0.34
  -5   8 -11   37.38    0.42
  -5   8 -10    1.78    0.22
  -5   8  -9   18.05    0.39
  -5   8  -8   10.19    0.45
  -5   8  -7   10.94    0.59
  -5   8  -6   12.99    0.47
  -5   8  -5    8.42    0.20
  -5   8  -4   20.17    1.07
  -5   8  -3    1.71    0.11
  -5   8  -2    0.58    0.41
  -5   8  -1    1.59    0.18
  -5   8   0   21.15    0.41
  -5   8   1   11.23    0.56
  -5   8   2    2.67    0.26
  -5   8   3    3.22    0.35
  -5   8   4   38.03    0.69
  -5   8   5    8.21    0.81
  -5   8   6   13.86    0.52
  -5   8   7    2.36    0.35
  -5   8   8    1.28    0.21
  -5   8   9    0.29    0.17
  -5   9 -16    0.29    0.08
  -5   9 -15    1.34    0.12
  -5   9 -14    0.28    0.13
  -5   9 -13   15.10    0.35
  -5   9 -12   10.03    0.40
  -5   9 -11   23.40    0.43
  -5   9 -10    2.61    0.15
  -5   9  -9   12.78    0.18
  -5   9  -8    3.49    0.43
  -5   9  -7   12.66    0.13
  -5   9  -6    5.26    0.31
  -5   9  -5   14.30    0.56
  -5   9  -4    5.49    0.25
  -5   9  -3    3.82    0.27
  -5   9  -2    2.69    0.22
  -5   9  -1    6.75    0.06
  -5   9   0   42.45    1.24
  -5   9   1   26.37    0.75
  -5   9   2    4.17    0.29
  -5   9   3   21.99    0.56
  -5   9   4   39.58    1.37
  -5   9   5    6.49    0.41
  -5   9   6    2.44    0.30
  -5   9   7    1.43    0.26
  -5   9   8    0.01    0.16
  -5   9   9    0.03    0.14
  -5  10 -16    0.97    0.10
  -5  10 -15    0.69    0.10
  -5  10 -14    2.65    0.25
  -5  10 -13   17.48    0.54
  -5  10 -12    4.43    0.14
  -5  10 -11   30.79    0.71
  -5  10 -10   11.13    0.29
  -5  10  -9   47.20    0.88
  -5  10  -8    0.57    0.23
  -5  10  -7   25.66    0.57
  -5  10  -6   10.71    0.13
  -5  10  -5   14.77    0.37
  -5  10  -4    4.88    0.16
  -5  10  -3    5.92    0.14
  -5  10  -2   17.14    0.90
  -5  10  -1   10.93    0.40
  -5  10   0    2.23    0.13
  -5  10   1   20.72    0.47
  -5  10   2   13.75    0.55
  -5  10   3    3.67    0.22
  -5  10   4    0.88    0.31
  -5  10   5    4.15    0.40
  -5  10   6    0.50    0.18
  -5  10   7    5.77    0.40
  -5  10   8    3.56    0.24
  -5  11 -16    3.25    0.18
  -5  11 -15    0.10    0.08
  -5  11 -14    3.77    0.17
  -5  11 -13    0.40    0.12
  -5  11 -12    1.29    0.16
  -5  11 -11    5.40    0.16
  -5  11 -10   19.34    0.29
  -5  11  -9   13.86    0.30
  -5  11  -8    8.23    0.40
  -5  11  -7    8.48    0.37
  -5  11  -6    2.28    0.19
  -5  11  -5    3.60    0.27
  -5  11  -4    1.25    0.16
  -5  11  -3   11.28    0.44
  -5  11  -2   14.61    0.38
  -5  11  -1    2.33    0.24
  -5  11   0   22.78    0.71
  -5  11   1    1.34    0.26
  -5  11   2    8.47    0.36
  -5  11   3    6.69    0.61
  -5  11   4    1.99    0.19
  -5  11   5    4.22    0.28
  -5  11   6   16.26    0.79
  -5  11   7    3.00    0.24
  -5  12 -16    1.50    0.16
  -5  12 -15    2.34    0.15
  -5  12 -14   17.54    0.73
  -5  12 -13    0.49    0.17
  -5  12 -12    3.34    0.19
  -5  12 -11    7.78    0.26
  -5  12 -10    7.16    0.32
  -5  12  -9    4.44    0.09
  -5  12  -8    5.03    0.17
  -5  12  -7    4.70    0.13
  -5  12  -6   16.07    0.59
  -5  12  -5    2.50    0.20
  -5  12  -4    4.93    0.35
  -5  12  -3   15.35    0.61
  -5  12  -2    5.81    0.27
  -5  12  -1   10.50    0.36
  -5  12   0    4.98    0.42
  -5  12   1    2.05    0.43
  -5  12   2    0.19    0.17
  -5  12   3    1.56    0.16
  -5  12   4    3.71    0.31
  -5  12   5    4.71    0.28
  -5  12   6    5.58    0.27
  -5  13 -16    4.89    0.30
  -5  13 -15    2.73    0.10
  -5  13 -14    5.82    0.12
  -5  13 -13    0.52    0.10
  -5  13 -12    4.98    0.14
  -5  13 -11    2.05    0.13
  -5  13 -10    6.16    0.30
  -5  13  -9    3.51    0.46
  -5  13  -8    1.46    0.10
  -5  13  -7    1.76    0.11
  -5  13  -6    8.26    0.15
  -5  13  -5    0.49    0.09
  -5  13  -4    0.82    0.22
  -5  13  -3    6.57    0.13
  -5  13  -2    0.36    0.15
  -5  13  -1    1.21    0.29
  -5  13   0    8.64    0.41
  -5  13   1   10.51    0.58
  -5  13   2    5.14    0.42
  -5  13   3    8.53    0.54
  -5  13   4    2.10    0.21
  -5  13   5    6.15    0.42
  -5  14 -16    3.39    0.14
  -5  14 -15    8.45    0.94
  -5  14 -14    9.11    0.27
  -5  14 -13    1.02    0.14
  -5  14 -12    0.88    0.09
  -5  14 -11    2.11    0.16
  -5  14 -10    4.93    0.18
  -5  14  -9    0.57    0.22
  -5  14  -8    2.30    0.19
  -5  14  -7    0.29    0.10
  -5  14  -6   17.35    0.29
  -5  14  -5    6.32    0.15
  -5  14  -4   16.70    0.63
  -5  14  -3   10.32    0.48
  -5  14  -2    4.60    0.21
  -5  14  -1    5.08    0.28
  -5  14   0    5.60    0.40
  -5  14   1    0.94    0.20
  -5  14   2    0.76    0.16
  -5  14   3    0.36    0.11
  -5  14   4    1.05    0.11
  -5  15 -15    3.28    0.25
  -5  15 -14    2.19    0.13
  -5  15 -13    7.54    0.34
  -5  15 -12    2.09    0.10
  -5  15 -11    1.24    0.23
  -5  15 -10   12.53    0.27
  -5  15  -9    4.79    0.60
  -5  15  -8    6.67    0.23
  -5  15  -7    4.79    0.19
  -5  15  -6   18.53    0.60
  -5  15  -5    5.23    0.31
  -5  15  -4   11.27    0.19
  -5  15  -3    7.40    0.51
  -5  15  -2    2.54    0.18
  -5  15  -1    1.31    0.20
  -5  15   0    3.27    0.29
  -5  15   1    3.05    0.21
  -5  15   2    0.47    0.09
  -5  16 -14    2.39    0.13
  -5  16 -13    0.44    0.05
  -5  16 -12    3.36    0.11
  -5  16 -11    6.11    0.36
  -5  16 -10   19.03    0.83
  -5  16  -9    4.29    0.34
  -5  16  -8    0.05    0.08
  -5  16  -7    4.14    0.24
  -5  16  -6    5.29    0.20
  -5  16  -5    4.99    0.19
  -5  16  -4    5.97    0.24
  -5  16  -3    1.80    0.12
  -5  16  -2   12.16    0.26
  -5  16  -1    1.22    0.12
  -5  16   0    5.53    0.15
  -5  17 -13    0.62    0.12
  -5  17 -12    1.45    0.10
  -5  17 -11    4.96    0.21
  -5  17 -10    2.99    0.18
  -5  17  -9    6.94    0.28
  -5  17  -8    1.50    0.18
  -5  17  -7    0.17    0.11
  -5  17  -6    2.43    0.18
  -5  17  -5    3.71    0.11
  -5  17  -4    3.27    0.15
  -5  17  -3    1.44    0.09
  -5  17  -2    0.22    0.14
  -5  18 -11    1.27    0.23
  -5  18 -10    2.10    0.14
  -5  18  -9    3.03    0.14
  -5  18  -8    0.21    0.10
  -5  18  -7    1.33    0.13
  -5  18  -6    0.99    0.09
  -5  18  -5    0.78    0.15
  -4  -8  -7    0.14    0.17
  -4  -7  -9    2.30    0.22
  -4  -7  -8    2.99    0.24
  -4  -7  -7    8.45    0.42
  -4  -7  -6    1.19    0.22
  -4  -7  -5    5.30    0.45
  -4  -6 -10    0.73    0.18
  -4  -6  -9    0.57    0.18
  -4  -6  -8    4.08    0.30
  -4  -6  -7    1.73    0.27
  -4  -6  -6    1.41    0.20
  -4  -6  -5   32.72    1.41
  -4  -6  -4   13.20    0.55
  -4  -5 -11    0.77    0.15
  -4  -5 -10    1.39    0.26
  -4  -5  -9    7.25    0.40
  -4  -5  -8    9.34    0.60
  -4  -5  -7   11.55    0.69
  -4  -5  -6    0.03    0.25
  -4  -5  -5    0.65    0.23
  -4  -4 -12    1.40    0.20
  -4  -4 -11    5.40    0.33
  -4  -4 -10    4.28    0.33
  -4  -4  -9    1.71    0.21
  -4  -4  -8    6.44    0.57
  -4  -4  -7   31.13    1.68
  -4  -4  -6    7.00    0.47
  -4  -3 -13    0.76    0.14
  -4  -3 -12    1.46    0.25
  -4  -3 -10    1.92    0.27
  -4  -3  -9   37.22    1.79
  -4  -3  -8   19.01    1.14
  -4  -3  -7    3.18    0.28
  -4  -2 -13    0.32    0.17
  -4  -2 -12    3.55    0.17
  -4  -2 -11    0.69    0.14
  -4  -2 -10   13.62    1.40
  -4  -2  -9   10.96    0.25
  -4  -2  -8    2.13    0.61
  -4  -2  -7    3.34    0.19
  -4  -2  -6    1.10    0.15
  -4  -2  -5   28.25    0.44
  -4  -2  -4   14.33    1.12
  -4  -2  -3   51.38    1.54
  -4  -2  -2    0.36    0.17
  -4  -2  -1   72.80    1.34
  -4  -1 -14    2.15    0.16
  -4  -1 -13    1.10    0.13
  -4  -1 -12    3.35    0.18
  -4  -1 -11    5.26    0.25
  -4  -1 -10    1.55    0.09
  -4  -1  -9    6.50    0.20
  -4  -1  -8    0.64    0.18
  -4  -1  -7   15.03    0.66
  -4  -1  -6    3.08    0.22
  -4  -1  -5  103.74    3.77
  -4  -1  -4    2.76    0.77
  -4  -1  -3   30.12    0.66
  -4  -1  -2  159.00    4.00
  -4  -1  -1   63.38    4.11
  -4   0 -14    1.07    0.21
  -4   0 -13    4.30    0.24
  -4   0 -12    6.46    0.36
  -4   0 -11    2.61    0.30
  -4   0 -10    1.09    0.09
  -4   0  -9    3.94    0.29
  -4   0  -8    2.76    0.47
  -4   0  -7   15.61    1.01
  -4   0  -6    6.98    0.45
  -4   0  -5    1.84    0.51
  -4   0  -4  114.18    6.16
  -4   0  -3    1.31    0.26
  -4   0  -2   77.88    3.35
  -4   0  -1    2.81    1.17
  -4   0   0  262.36   11.34
  -4   0   4   58.87    1.95
  -4   1 -15    0.96    0.14
  -4   1 -14    7.16    0.34
  -4   1 -13    4.85    0.58
  -4   1 -12    2.25    0.33
  -4   1 -11    4.52    0.31
  -4   1 -10    7.52    0.40
  -4   1  -9    3.31    0.20
  -4   1  -8    4.79    0.46
  -4   1  -7    3.40    0.25
  -4   1  -6  123.49    3.66
  -4   1  -5    8.33    0.79
  -4   1  -4   57.57    0.99
  -4   1  -3   24.11    0.60
  -4   1  -2   16.38    0.09
  -4   1  -1   26.05    3.39
  -4   1   0  411.67   10.12
  -4   1   1   68.44    7.83
  -4   1   2   58.41    0.50
  -4   1   3   64.49    1.74
  -4   1   4   56.28    2.17
  -4   1   5   13.48    0.31
  -4   2 -15    1.74    0.11
  -4   2 -14    1.78    0.20
  -4   2 -13    6.81    0.50
  -4   2 -12   22.84    1.02
  -4   2 -11    8.37    0.32
  -4   2 -10    4.79    0.17
  -4   2  -9    2.65    0.31
  -4   2  -8    8.14    0.14
  -4   2  -7    2.64    0.38
  -4   2  -6   45.85    0.36
  -4   2  -5   18.99    0.91
  -4   2  -4   37.85    0.71
  -4   2  -3  150.33    5.09
  -4   2  -2  123.32    3.07
  -4   2  -1  202.14   11.99
  -4   2   0  178.79    6.16
  -4   2   1   53.40    6.05
  -4   2   2  155.68    9.46
  -4   2   3   56.35    1.01
  -4   2   4   20.35    1.59
  -4   2   5    3.22    0.11
  -4   2   6   21.23    0.41
  -4   3 -16    0.99    0.13
  -4   3 -15    0.13    0.15
  -4   3 -14    5.03    0.26
  -4   3 -13   12.54    0.42
  -4   3 -12    3.20    0.20
  -4   3 -11    1.92    0.23
  -4   3 -10    5.50    0.26
  -4   3  -9    5.67    0.13
  -4   3  -8   14.82    0.33
  -4   3  -7   18.77    0.57
  -4   3  -6  150.29    7.11
  -4   3  -5   12.73    0.19
  -4   3  -4   38.49    1.14
  -4   3  -3   57.92    0.15
  -4   3  -2  318.11   16.95
  -4   3  -1   29.73    1.40
  -4   3   0   43.27    1.57
  -4   3   1   67.84    4.08
  -4   3   2   38.19    0.31
  -4   3   3   13.81    1.34
  -4   3   4   14.21    0.17
  -4   3   5   39.74    1.41
  -4   3   6    0.85    0.16
  -4   4 -16    2.19    0.27
  -4   4 -15    4.36    0.44
  -4   4 -14    5.18    0.43
  -4   4 -13    1.55    0.20
  -4   4 -12    4.26    0.19
  -4   4 -11    4.14    0.12
  -4   4 -10    7.74    0.32
  -4   4  -9   12.50    0.13
  -4   4  -8   85.80    3.51
  -4   4  -7    8.12    0.28
  -4   4  -6    8.24    0.26
  -4   4  -5   34.95    3.31
  -4   4  -4   50.18    2.23
  -4   4  -3   15.77    0.40
  -4   4  -2   41.25    0.44
  -4   4  -1  302.81    9.36
  -4   4   0   32.42    0.96
  -4   4   1   75.38    2.51
  -4   4   2    7.93    0.41
  -4   4   3   65.92    0.64
  -4   4   4   46.07    3.04
  -4   4   5   24.23    0.72
  -4   4   6   19.71    0.67
  -4   4   7   10.25    0.37
  -4   5 -16    2.98    0.33
  -4   5 -15    3.39    0.25
  -4   5 -14    2.19    0.19
  -4   5 -13    4.59    0.31
  -4   5 -12    5.56    0.17
  -4   5 -11   11.66    0.65
  -4   5 -10   20.25    0.37
  -4   5  -9    5.03    0.22
  -4   5  -8   11.42    0.16
  -4   5  -7   53.38    2.06
  -4   5  -6    2.72    0.28
  -4   5  -5   25.93    0.17
  -4   5  -4   38.00    1.39
  -4   5  -3  103.43    5.06
  -4   5  -2   37.47    1.71
  -4   5  -1   50.58    0.82
  -4   5   0   25.16    0.95
  -4   5   1   35.77    1.67
  -4   5   2   38.21    2.37
  -4   5   3   25.81    0.48
  -4   5   4   21.89    0.80
  -4   5   5   68.80    2.42
  -4   5   6    1.49    0.30
  -4   5   7    0.16    0.20
  -4   6 -17    2.24    0.17
  -4   6 -16    4.84    0.25
  -4   6 -15    0.72    0.18
  -4   6 -14    4.81    0.32
  -4   6 -13    4.05    0.19
  -4   6 -12    8.29    0.24
  -4   6 -11    6.13    0.21
  -4   6 -10    2.02    0.19
  -4   6  -9   38.70    1.00
  -4   6  -8    4.46    0.28
  -4   6  -7   26.05    1.08
  -4   6  -6   17.25    0.88
  -4   6  -5   34.63    2.52
  -4   6  -4    4.06    0.83
  -4   6  -3   97.78    1.14
  -4   6  -2   15.77    0.39
  -4   6  -1  128.64    5.18
  -4   6   0   47.89    1.48
  -4   6   1    6.59    0.21
  -4   6   2   33.22    0.31
  -4   6   3  146.58    5.30
  -4   6   4    3.73    0.15
  -4   6   5    5.16    0.23
  -4   6   6    2.38    0.15
  -4   6   7   12.07    0.58
  -4   6   8   13.28    0.47
  -4   7 -17    3.50    0.26
  -4   7 -16    4.81    0.18
  -4   7 -15   11.85    0.56
  -4   7 -14    3.60    0.17
  -4   7 -13   12.02    0.47
  -4   7 -12    3.51    0.14
  -4   7 -11   17.52    0.51
  -4   7 -10    8.32    0.37
  -4   7  -9   20.33    0.41
  -4   7  -8    2.07    0.21
  -4   7  -7   13.89    0.44
  -4   7  -6   52.45    1.55
  -4   7  -5   68.08    1.15
  -4   7  -4    7.96    0.90
  -4   7  -3  159.24    3.03
  -4   7  -2   11.37    0.35
  -4   7  -1   77.90    1.80
  -4   7   0   36.82    1.34
  -4   7   1   82.95    4.65
  -4   7   2    4.64    0.66
  -4   7   3    8.45    0.31
  -4   7   4   34.27    1.04
  -4   7   5    2.21    0.15
  -4   7   6    6.31    0.19
  -4   7   7    0.86    0.19
  -4   7   8    6.83    0.26
  -4   7   9    2.66    0.26
  -4   8 -17    1.96    0.16
  -4   8 -16    4.21    0.32
  -4   8 -15    0.50    0.16
  -4   8 -14    1.14    0.14
  -4   8 -13    0.96    0.12
  -4   8 -12    3.03    0.18
  -4   8 -11    8.46    0.18
  -4   8 -10    6.83    0.08
  -4   8  -9   34.80    0.44
  -4   8  -8    0.43    0.16
  -4   8  -7    6.32    0.26
  -4   8  -6   14.78    0.51
  -4   8  -5   82.32    3.57
  -4   8  -4    0.85    0.24
  -4   8  -3   26.57    1.77
  -4   8  -2   51.57    0.77
  -4   8  -1    5.06    0.32
  -4   8   0    6.79    0.25
  -4   8   1   19.82    0.44
  -4   8   2   36.23    1.81
  -4   8   3    2.23    0.22
  -4   8   4   21.74    0.57
  -4   8   5    1.79    0.13
  -4   8   6    2.15    0.12
  -4   8   7   25.70    1.11
  -4   8   8    0.03    0.17
  -4   9 -17    0.14    0.11
  -4   9 -16    3.56    0.14
  -4   9 -15    3.85    0.23
  -4   9 -14    0.66    0.09
  -4   9 -13   10.31    0.25
  -4   9 -12    4.57    0.11
  -4   9 -11   32.79    0.86
  -4   9 -10    0.67    0.19
  -4   9  -9    7.35    0.20
  -4   9  -8    0.60    0.11
  -4   9  -7   42.19    1.63
  -4   9  -6   12.24    0.38
  -4   9  -5    2.65    0.12
  -4   9  -4   29.49    1.34
  -4   9  -3    4.41    0.49
  -4   9  -2   74.17    4.11
  -4   9  -1   23.51    0.59
  -4   9   0    9.03    0.21
  -4   9   1    5.42    0.10
  -4   9   2    7.75    0.18
  -4   9   3    2.39    0.16
  -4   9   4    4.25    0.17
  -4   9   5    3.82    0.44
  -4   9   6    1.52    0.19
  -4   9   7    1.41    0.29
  -4   9   8    8.14    0.40
  -4   9   9    3.75    0.30
  -4  10 -17    1.59    0.11
  -4  10 -16    5.01    0.37
  -4  10 -15    2.77    0.14
  -4  10 -14    4.57    0.28
  -4  10 -13   15.19    0.54
  -4  10 -12   10.15    0.55
  -4  10 -11   11.65    0.14
  -4  10 -10   30.72    0.91
  -4  10  -9    0.80    0.06
  -4  10  -8    0.53    0.11
  -4  10  -7    1.35    0.15
  -4  10  -6   40.92    1.38
  -4  10  -5   27.28    0.62
  -4  10  -4   32.48    2.00
  -4  10  -3    0.70    0.14
  -4  10  -2   14.13    0.13
  -4  10  -1   27.48    0.88
  -4  10   0   18.06    0.24
  -4  10   1    3.43    0.25
  -4  10   2   23.14    0.45
  -4  10   3    1.11    0.14
  -4  10   4    0.64    0.23
  -4  10   6    1.99    0.35
  -4  10   7    9.79    0.67
  -4  10   8    0.80    0.21
  -4  11 -17    3.92    0.17
  -4  11 -16   12.15    0.42
  -4  11 -15    2.93    0.21
  -4  11 -14    6.75    0.26
  -4  11 -13    4.34    0.14
  -4  11 -12    7.47    0.45
  -4  11 -11    7.20    0.24
  -4  11 -10    1.19    0.06
  -4  11  -9    2.83    0.20
  -4  11  -8   13.70    0.27
  -4  11  -7    7.77    0.29
  -4  11  -6    3.36    0.14
  -4  11  -5   15.46    0.19
  -4  11  -4   29.34    0.48
  -4  11  -3    7.52    0.51
  -4  11  -2    2.58    0.20
  -4  11  -1    8.93    0.20
  -4  11   0   50.18    1.88
  -4  11   1    0.83    0.21
  -4  11   2    1.41    0.34
  -4  11   3    1.51    0.17
  -4  11   4    2.88    0.23
  -4  11   5    0.47    0.16
  -4  11   6    0.51    0.16
  -4  11   7    2.35    0.28
  -4  12 -17    5.87    0.36
  -4  12 -16    6.00    0.19
  -4  12 -15    2.99    0.19
  -4  12 -14    7.52    0.18
  -4  12 -13    9.46    0.22
  -4  12 -12    2.14    0.11
  -4  12 -11    0.64    0.16
  -4  12 -10    1.16    0.10
  -4  12  -9    2.10    0.11
  -4  12  -8    4.08    0.08
  -4  12  -7    6.86    0.10
  -4  12  -6   50.10    1.29
  -4  12  -5    0.67    0.16
  -4  12  -4    3.76    0.22
  -4  12  -3   14.96    0.15
  -4  12  -2   26.12    0.66
  -4  12  -1    2.18    0.17
  -4  12   0    1.84    0.08
  -4  12   1    4.84    0.39
  -4  12   2    0.42    0.21
  -4  12   3    3.21    0.60
  -4  12   4    1.85    0.21
  -4  12   5    5.34    0.35
  -4  12   6    8.25    0.36
  -4  13 -16    1.71    0.16
  -4  13 -15    0.59    0.09
  -4  13 -14    6.45    0.26
  -4  13 -13    6.78    0.17
  -4  13 -12    1.45    0.11
  -4  13 -11    0.08    0.10
  -4  13 -10    0.49    0.07
  -4  13  -9    1.87    0.13
  -4  13  -8    5.16    0.14
  -4  13  -7   16.67    0.69
  -4  13  -6   18.49    0.15
  -4  13  -5    1.54    0.25
  -4  13  -4    7.10    0.28
  -4  13  -3    0.48    0.12
  -4  13  -2    2.24    0.19
  -4  13  -1    4.35    0.73
  -4  13   0    0.18    0.10
  -4  13   1    3.78    0.33
  -4  13   2    0.12    0.20
  -4  13   3    5.53    0.23
  -4  13   4    4.08    0.22
  -4  13   5    0.36    0.10
  -4  14 -16    0.83    0.12
  -4  14 -15    3.31    0.17
  -4  14 -14    7.55    0.16
  -4  14 -13    2.07    0.14
  -4  14 -12    1.30    0.06
  -4  14 -11    0.17    0.09
  -4  14 -10    3.46    0.15
  -4  14  -9    0.39    0.06
  -4  14  -8    1.18    0.18
  -4  14  -7   14.78    0.53
  -4  14  -6    3.58    0.36
  -4  14  -5    6.79    0.18
  -4  14  -4    3.78    0.13
  -4  14  -3   13.94    0.30
  -4  14  -2    7.40    0.18
  -4  14  -1    2.82    0.10
  -4  14   0    1.09    0.12
  -4  14   1    1.01    0.11
  -4  14   2    4.01    0.29
  -4  14   3    1.61    0.34
  -4  14   4    2.85    0.18
  -4  15 -16    0.26    0.11
  -4  15 -15    4.63    0.11
  -4  15 -14    1.93    0.10
  -4  15 -13    2.82    0.14
  -4  15 -12    4.36    0.13
  -4  15 -11    0.79    0.07
  -4  15 -10    0.74    0.19
  -4  15  -9    7.40    0.20
  -4  15  -8    2.54    0.07
  -4  15  -7    9.75    0.28
  -4  15  -6    0.02    0.11
  -4  15  -5    1.91    0.08
  -4  15  -4    2.56    0.16
  -4  15  -3    2.14    0.11
  -4  15  -2    2.85    0.16
  -4  15  -1    4.71    0.19
  -4  15   0    0.50    0.08
  -4  15   1    0.14    0.09
  -4  15   2    0.60    0.09
  -4  16 -15    0.56    0.21
  -4  16 -14    1.19    0.08
  -4  16 -13    0.47    0.06
  -4  16 -12    1.09    0.12
  -4  16 -11    4.99    0.25
  -4  16 -10    0.61    0.09
  -4  16  -9    2.33    0.11
  -4  16  -8    1.91    0.25
  -4  16  -7    1.40    0.15
  -4  16  -6    4.66    0.44
  -4  16  -5    1.33    0.08
  -4  16  -4    3.58    0.11
  -4  16  -3    1.65    0.14
  -4  16  -2    3.02    0.23
  -4  16  -1    1.61    0.10
  -4  16   0    0.34    0.06
  -4  17 -14    0.20    0.13
  -4  17 -13    0.14    0.07
  -4  17 -12    1.97    0.06
  -4  17 -11    0.71    0.24
  -4  17 -10   18.75    0.56
  -4  17  -9    7.05    0.28
  -4  17  -8    1.50    0.11
  -4  17  -7    1.56    0.13
  -4  17  -6    0.90    0.12
  -4  17  -5    4.57    0.22
  -4  17  -4    0.21    0.13
  -4  17  -3    0.92    0.06
  -4  17  -2    1.36    0.10
  -4  18 -12    1.53    0.24
  -4  18 -11   13.14    0.44
  -4  18 -10    9.19    0.39
  -4  18  -9    5.10    0.27
  -4  18  -8    1.75    0.09
  -4  18  -7    0.59    0.11
  -4  18  -6    0.30    0.07
  -4  18  -5    1.56    0.12
  -3  -8  -9    0.69    0.14
  -3  -8  -8    0.48    0.17
  -3  -8  -7    0.70    0.17
  -3  -8  -6    2.00    0.20
  -3  -7 -10    3.42    0.28
  -3  -7  -9    0.84    0.18
  -3  -7  -8    9.92    0.62
  -3  -7  -7    2.93    0.28
  -3  -7  -6    2.07    0.31
  -3  -7  -5    6.78    0.32
  -3  -6 -11    0.93    0.19
  -3  -6 -10    8.99    0.47
  -3  -6  -9    1.12    0.26
  -3  -6  -8    4.24    0.30
  -3  -6  -7    3.42    0.44
  -3  -6  -6    0.25    0.28
  -3  -6  -5    4.74    0.65
  -3  -5 -12    1.19    0.16
  -3  -5 -11    0.59    0.21
  -3  -5 -10    6.25    0.47
  -3  -5  -9    1.68    0.27
  -3  -5  -8    7.54    0.63
  -3  -5  -7   14.91    0.46
  -3  -5  -6   38.02    1.37
  -3  -5  -5   13.13    0.39
  -3  -4 -12    3.53    0.30
  -3  -4 -11    1.44    0.19
  -3  -4 -10    0.12    0.21
  -3  -4  -9   15.56    0.81
  -3  -4  -8    1.72    0.21
  -3  -4  -7    3.99    0.30
  -3  -4  -6   21.94    0.75
  -3  -3 -13    1.78    0.12
  -3  -3 -12    6.19    0.22
  -3  -3 -11    1.45    0.21
  -3  -3 -10    1.09    0.18
  -3  -3  -9    8.80    0.33
  -3  -3  -8   25.58    1.38
  -3  -3  -7    9.19    0.63
  -3  -3  -6    9.65    0.83
  -3  -3  -5   41.64    1.15
  -3  -3  -4   10.40    0.50
  -3  -3  -3   14.86    0.13
  -3  -3  -2    4.54    0.25
  -3  -3  -1    0.86    0.79
  -3  -2 -14    4.70    0.34
  -3  -2 -13    1.21    0.19
  -3  -2 -12    0.81    0.25
  -3  -2 -11    6.50    0.30
  -3  -2 -10    1.26    0.32
  -3  -2  -9    3.08    0.21
  -3  -2  -8   11.28    0.27
  -3  -2  -7   31.84    1.62
  -3  -2  -6    3.76    0.28
  -3  -2  -5   65.61    2.75
  -3  -2  -4   38.32    3.00
  -3  -2  -3   98.60    5.12
  -3  -2  -2   63.62    1.59
  -3  -2  -1    3.24    0.17
  -3  -1 -14    2.19    0.16
  -3  -1 -13   19.48    0.76
  -3  -1 -12    1.88    0.30
  -3  -1 -11    7.90    0.43
  -3  -1 -10    8.21    0.25
  -3  -1  -9   32.78    1.83
  -3  -1  -8   10.02    0.33
  -3  -1  -7   28.13    0.78
  -3  -1  -6    4.37    0.22
  -3  -1  -5   43.00    1.35
  -3  -1  -4   52.43    2.77
  -3  -1  -3    9.02    1.66
  -3  -1  -2   46.81    0.54
  -3  -1  -1  174.28    5.25
  -3   0 -15    3.62    0.20
  -3   0 -14   11.71    0.45
  -3   0 -13   18.30    0.47
  -3   0 -12    1.97    0.27
  -3   0 -11    1.32    0.13
  -3   0 -10    5.12    0.17
  -3   0  -9   33.46    0.33
  -3   0  -8    0.87    0.20
  -3   0  -7   82.40    1.51
  -3   0  -6    0.34    0.07
  -3   0  -5    2.14    0.27
  -3   0  -4   52.54    0.56
  -3   0  -3   84.97    3.56
  -3   0  -2   64.75    3.15
  -3   0  -1    4.62    0.09
  -3   0   4    6.64    1.43
  -3   0   5   11.48    0.89
  -3   1 -15    5.02    0.20
  -3   1 -14    0.34    0.18
  -3   1 -13    4.64    0.69
  -3   1 -12    5.11    0.19
  -3   1 -11    1.16    0.19
  -3   1 -10    9.08    0.25
  -3   1  -9   38.14    0.84
  -3   1  -8   16.26    0.27
  -3   1  -7   21.70    0.74
  -3   1  -6   44.35    0.81
  -3   1  -5   10.67    0.40
  -3   1  -4    4.14    0.29
  -3   1  -3  102.03    1.02
  -3   1  -2   32.44    1.45
  -3   1  -1   39.49    0.69
  -3   1   0   17.86    0.36
  -3   1   1   10.23    0.34
  -3   1   2    0.61    0.09
  -3   1   3   17.95    0.32
  -3   1   4    7.29    0.27
  -3   1   5   51.83    0.97
  -3   1   6   51.08    1.06
  -3   2 -16    0.07    0.11
  -3   2 -15    3.46    0.23
  -3   2 -14    0.60    0.12
  -3   2 -13    0.71    0.20
  -3   2 -12    1.79    0.24
  -3   2 -11   19.85    0.46
  -3   2 -10    0.66    0.11
  -3   2  -9   21.19    0.50
  -3   2  -8   13.78    0.64
  -3   2  -7    1.42    0.61
  -3   2  -6   32.41    0.61
  -3   2  -5   64.28    0.71
  -3   2  -4   39.88    1.37
  -3   2  -3    1.88    0.06
  -3   2  -2   62.92    1.27
  -3   2  -1  122.81    4.22
  -3   2   0    4.49    0.24
  -3   2   1   15.48    0.61
  -3   2   2    2.60    0.13
  -3   2   3   50.27    1.06
  -3   2   4   16.88    0.49
  -3   2   5   15.88    0.68
  -3   2   6   28.40    1.10
  -3   2   7    6.68    0.13
  -3   3 -16    0.60    0.15
  -3   3 -15    0.10    0.16
  -3   3 -14    6.06    0.39
  -3   3 -13    5.60    0.26
  -3   3 -12    3.73    0.42
  -3   3 -11   16.33    0.32
  -3   3 -10   13.48    0.33
  -3   3  -9    0.65    0.15
  -3   3  -8  109.47    2.36
  -3   3  -7   15.08    1.00
  -3   3  -6   60.85    2.20
  -3   3  -5   25.24    0.72
  -3   3  -4   23.50    0.41
  -3   3  -3    0.07    0.08
  -3   3  -2   40.63    2.44
  -3   3  -1   11.94    0.60
  -3   3   0   89.60    3.30
  -3   3   1    9.37    0.84
  -3   3   2   43.84    1.48
  -3   3   3   88.57    2.93
  -3   3   4    2.49    0.19
  -3   3   5   10.62    0.58
  -3   3   6   10.84    0.50
  -3   3   7    5.68    0.12
  -3   4 -16    4.40    0.31
  -3   4 -15    0.05    0.14
  -3   4 -14    7.28    0.36
  -3   4 -13    0.73    0.24
  -3   4 -12   21.43    0.56
  -3   4 -11    4.34    0.16
  -3   4 -10   59.62    1.23
  -3   4  -9    2.38    0.31
  -3   4  -8   63.01    3.18
  -3   4  -7   85.37    1.44
  -3   4  -6   12.36    0.42
  -3   4  -5   44.27    2.00
  -3   4  -4   82.81    2.30
  -3   4  -3    1.19    0.14
  -3   4  -2   45.73    1.94
  -3   4  -1   14.27    0.28
  -3   4   0    2.41    0.57
  -3   4   1   33.22    0.43
  -3   4   2   27.08    0.54
  -3   4   3   21.98    1.15
  -3   4   4   23.35    0.66
  -3   4   5   11.56    0.21
  -3   4   6    4.21    0.31
  -3   4   7    1.10    0.14
  -3   5 -17    3.16    0.27
  -3   5 -16    5.40    0.34
  -3   5 -15    0.54    0.17
  -3   5 -14    8.45    0.66
  -3   5 -13    8.19    0.31
  -3   5 -12    3.87    0.11
  -3   5 -11    0.93    0.09
  -3   5 -10   49.32    1.06
  -3   5  -9   10.46    0.46
  -3   5  -8   13.86    1.47
  -3   5  -7   29.52    2.13
  -3   5  -6  184.17    5.40
  -3   5  -5    7.41    0.14
  -3   5  -4    9.06    0.14
  -3   5  -3   15.94    0.18
  -3   5  -2   24.98    1.56
  -3   5  -1   24.86    0.11
  -3   5   0   37.91    1.58
  -3   5   1   10.88    1.20
  -3   5   2   17.84    0.36
  -3   5   3  101.24    3.31
  -3   5   4  103.10    3.63
  -3   5   5   10.02    0.31
  -3   5   6    6.18    0.29
  -3   5   7   17.68    0.31
  -3   5   8    9.98    0.40
  -3   6 -17    1.09    0.21
  -3   6 -16    1.61    0.24
  -3   6 -15    3.32    0.17
  -3   6 -14    4.50    0.16
  -3   6 -13    6.13    0.41
  -3   6 -12   47.07    0.65
  -3   6 -11    0.01    0.06
  -3   6 -10    9.87    0.16
  -3   6  -9   39.05    1.54
  -3   6  -8   45.49    1.82
  -3   6  -7   14.65    1.82
  -3   6  -6   42.45    1.18
  -3   6  -5   17.70    0.22
  -3   6  -4    9.17    0.78
  -3   6  -3   46.37    0.75
  -3   6  -2    7.43    0.09
  -3   6  -1   19.86    1.82
  -3   6   0   32.50    0.47
  -3   6   1    5.92    1.07
  -3   6   2   96.32    6.35
  -3   6   3   10.91    0.52
  -3   6   4    5.17    0.21
  -3   6   5    9.01    0.50
  -3   6   6    0.63    0.20
  -3   6   7    6.99    0.29
  -3   6   8    2.79    0.16
  -3   6   9    2.69    0.23
  -3   7 -17    0.01    0.08
  -3   7 -16    0.05    0.09
  -3   7 -15    8.49    0.36
  -3   7 -14   13.63    0.35
  -3   7 -13    8.02    0.65
  -3   7 -12   23.14    0.50
  -3   7 -11   42.32    0.61
  -3   7 -10    4.72    0.11
  -3   7  -9    1.16    0.12
  -3   7  -8   29.40    0.79
  -3   7  -7   35.92    2.76
  -3   7  -6   36.98    1.09
  -3   7  -5   30.14    1.80
  -3   7  -4   65.05    4.30
  -3   7  -3   11.03    1.10
  -3   7  -2   57.52    1.36
  -3   7  -1   20.07    1.00
  -3   7   0   33.71    0.82
  -3   7   1   36.19    1.08
  -3   7   2   55.33    0.71
  -3   7   3   36.49    2.20
  -3   7   4    6.17    0.32
  -3   7   5    1.52    0.11
  -3   7   6    5.24    0.12
  -3   7   7    6.34    0.23
  -3   7   8    5.51    0.59
  -3   7   9    3.27    0.20
  -3   7  10    0.21    0.15
  -3   8 -17    3.46    0.14
  -3   8 -16    0.13    0.11
  -3   8 -15    0.35    0.11
  -3   8 -14    8.25    0.30
  -3   8 -13   10.46    0.38
  -3   8 -12    2.65    0.19
  -3   8 -11   69.24    1.46
  -3   8 -10    1.93    0.06
  -3   8  -9   45.48    1.48
  -3   8  -8   12.27    0.52
  -3   8  -7   12.38    0.25
  -3   8  -6    6.46    0.25
  -3   8  -5   31.59    0.65
  -3   8  -4    8.82    0.85
  -3   8  -3   39.25    2.59
  -3   8  -2    5.43    0.82
  -3   8  -1   20.95    0.38
  -3   8   0   32.73    0.46
  -3   8   1    3.97    0.34
  -3   8   2    5.82    0.18
  -3   8   3    2.74    0.14
  -3   8   4   18.75    0.68
  -3   8   5    0.99    0.11
  -3   8   6    8.43    0.61
  -3   8   7    2.29    0.27
  -3   8   8   10.12    0.49
  -3   8   9    6.50    0.48
  -3   8  10    1.28    0.18
  -3   9 -17    4.55    0.22
  -3   9 -16    0.67    0.10
  -3   9 -15    6.83    0.33
  -3   9 -14    1.63    0.10
  -3   9 -13   26.86    0.45
  -3   9 -12    3.84    0.23
  -3   9 -11    5.30    0.10
  -3   9 -10    5.31    0.22
  -3   9  -9   15.08    0.11
  -3   9  -8    6.63    0.56
  -3   9  -7   30.69    1.08
  -3   9  -6    5.78    0.39
  -3   9  -5    2.25    0.38
  -3   9  -4   23.53    0.36
  -3   9  -3   12.58    0.58
  -3   9  -2   29.67    2.11
  -3   9  -1    0.29    0.28
  -3   9   0    8.06    0.91
  -3   9   1    5.57    0.27
  -3   9   2   17.97    0.26
  -3   9   3   19.76    0.46
  -3   9   4    1.44    0.14
  -3   9   5    8.02    0.68
  -3   9   6    2.82    0.33
  -3   9   7   11.61    0.75
  -3   9   8    2.92    0.35
  -3   9   9    1.56    0.18
  -3  10 -17    4.16    0.21
  -3  10 -16    4.27    0.18
  -3  10 -15    5.07    0.13
  -3  10 -14    1.70    0.11
  -3  10 -13   17.77    0.52
  -3  10 -12    6.34    0.16
  -3  10 -11    1.85    0.07
  -3  10 -10    2.77    0.08
  -3  10  -9    0.32    0.06
  -3  10  -8    8.17    0.44
  -3  10  -7   11.37    0.20
  -3  10  -6    1.75    0.87
  -3  10  -5    0.37    0.15
  -3  10  -4    1.68    0.11
  -3  10  -3    0.93    0.13
  -3  10  -2    5.63    0.10
  -3  10  -1   25.52    0.79
  -3  10   0   12.62    1.06
  -3  10   1   19.32    0.97
  -3  10   2    1.29    0.22
  -3  10   3    5.88    0.62
  -3  10   4    7.02    0.46
  -3  10   5    5.32    0.28
  -3  10   6    1.43    0.18
  -3  10   8    3.55    0.32
  -3  11 -17    0.60    0.10
  -3  11 -16    0.64    0.15
  -3  11 -15    9.42    0.65
  -3  11 -14    0.40    0.11
  -3  11 -13    0.31    0.06
  -3  11 -12    3.44    0.20
  -3  11 -11   17.38    0.42
  -3  11 -10    1.56    0.09
  -3  11  -9    9.14    0.20
  -3  11  -8    4.41    0.25
  -3  11  -7   10.75    0.18
  -3  11  -6   10.62    0.24
  -3  11  -5   12.01    0.64
  -3  11  -4    1.89    0.10
  -3  11  -3    4.11    0.16
  -3  11  -2    7.40    0.21
  -3  11  -1   56.47    1.22
  -3  11   0    5.54    0.15
  -3  11   1    3.40    0.09
  -3  11   2    7.14    0.38
  -3  11   5    5.56    0.36
  -3  11   6    1.40    0.16
  -3  11   7    1.14    0.17
  -3  12 -17    6.96    0.25
  -3  12 -16    1.03    0.16
  -3  12 -15    3.52    0.07
  -3  12 -14    9.76    0.62
  -3  12 -13    0.79    0.08
  -3  12 -12    2.25    0.06
  -3  12 -11    3.21    0.13
  -3  12 -10   11.84    0.32
  -3  12  -9    1.57    0.09
  -3  12  -8   36.10    0.31
  -3  12  -7   10.60    0.35
  -3  12  -6   15.05    0.30
  -3  12  -5   10.78    0.18
  -3  12  -4    9.23    0.27
  -3  12  -3   17.57    0.44
  -3  12  -2    3.03    0.16
  -3  12  -1    1.11    0.13
  -3  12   0   13.56    0.25
  -3  12   1    0.34    0.19
  -3  12   2    6.77    0.38
  -3  12   3    4.08    0.27
  -3  12   4    4.25    0.16
  -3  12   5    3.99    0.26
  -3  12   6    2.93    0.26
  -3  13 -17    1.90    0.16
  -3  13 -16    2.83    0.12
  -3  13 -15    7.08    0.17
  -3  13 -14    5.04    0.24
  -3  13 -13    3.70    0.08
  -3  13 -12   28.10    0.80
  -3  13 -11   12.38    0.37
  -3  13 -10    1.27    0.14
  -3  13  -9    9.18    0.25
  -3  13  -8   12.71    0.44
  -3  13  -7    5.77    0.05
  -3  13  -6    9.94    0.28
  -3  13  -5    7.57    0.12
  -3  13  -4    7.97    0.44
  -3  13  -3    2.19    0.14
  -3  13  -2    9.69    0.32
  -3  13  -1    5.45    0.24
  -3  13   0    2.40    0.17
  -3  13   1    5.05    0.17
  -3  13   2    0.82    0.14
  -3  13   3    8.08    0.38
  -3  13   4    0.20    0.19
  -3  13   5    1.14    0.18
  -3  14 -17    2.07    0.21
  -3  14 -16    7.55    0.19
  -3  14 -15    1.28    0.10
  -3  14 -14    8.36    0.45
  -3  14 -13    3.85    0.14
  -3  14 -12    4.62    0.16
  -3  14 -11    2.66    0.21
  -3  14 -10   10.28    0.30
  -3  14  -9    0.46    0.07
  -3  14  -8    4.16    0.26
  -3  14  -7    6.98    0.30
  -3  14  -6    5.41    0.15
  -3  14  -5   15.84    0.39
  -3  14  -4    2.23    0.15
  -3  14  -3    8.11    0.17
  -3  14  -2    1.08    0.10
  -3  14  -1    9.65    0.14
  -3  14   0   10.92    0.46
  -3  14   1    1.23    0.11
  -3  14   2    0.38    0.10
  -3  14   3    1.55    0.11
  -3  14   4    5.60    0.37
  -3  15 -16    3.56    0.14
  -3  15 -15    1.29    0.06
  -3  15 -14    1.72    0.07
  -3  15 -13    5.36    0.28
  -3  15 -12   12.03    0.22
  -3  15 -11   12.47    0.38
  -3  15 -10    2.04    0.07
  -3  15  -9    1.31    0.12
  -3  15  -8    0.65    0.07
  -3  15  -7    2.08    0.19
  -3  15  -6    1.21    0.06
  -3  15  -5    0.81    0.11
  -3  15  -4    1.17    0.08
  -3  15  -3    1.05    0.21
  -3  15  -2   16.79    0.49
  -3  15  -1    3.17    0.21
  -3  15   0    7.42    0.19
  -3  15   1    1.68    0.11
  -3  15   2    5.09    0.22
  -3  16 -15    0.72    0.07
  -3  16 -14    0.01    0.05
  -3  16 -13    1.94    0.11
  -3  16 -12    6.20    0.21
  -3  16 -11    2.20    0.09
  -3  16 -10    0.65    0.07
  -3  16  -9    0.83    0.12
  -3  16  -8    1.64    0.09
  -3  16  -7    1.42    0.13
  -3  16  -6    1.68    0.15
  -3  16  -5    1.01    0.09
  -3  16  -4    1.14    0.14
  -3  16  -3    4.22    0.46
  -3  16  -2    2.47    0.09
  -3  16  -1    5.31    0.18
  -3  16   0    1.20    0.08
  -3  17 -14    0.29    0.05
  -3  17 -13    0.51    0.05
  -3  17 -12    1.12    0.08
  -3  17 -11    8.21    0.26
  -3  17 -10    1.22    0.11
  -3  17  -9    3.91    0.22
  -3  17  -8    0.86    0.07
  -3  17  -7    1.08    0.11
  -3  17  -6    1.10    0.07
  -3  17  -5    1.52    0.16
  -3  17  -4    1.14    0.14
  -3  17  -3    2.19    0.19
  -3  17  -2    1.17    0.11
  -3  18 -12    3.34    0.23
  -3  18 -11    0.65    0.06
  -3  18 -10    0.04    0.06
  -3  18  -9    2.31    0.15
  -3  18  -8    0.04    0.05
  -3  18  -7    0.11    0.06
  -3  18  -6    1.91    0.09
  -3  18  -5    0.73    0.08
  -2  -8  -9    0.95    0.20
  -2  -8  -8    2.43    0.23
  -2  -8  -7    0.70    0.20
  -2  -8  -6    9.76    0.63
  -2  -7 -10    0.40    0.16
  -2  -7  -9    0.69    0.20
  -2  -7  -8    1.89    0.34
  -2  -7  -7    3.99    0.43
  -2  -7  -6    4.61    0.42
  -2  -7  -5    1.13    0.59
  -2  -6 -11    5.31    0.33
  -2  -6 -10   18.68    0.99
  -2  -6  -9    2.61    0.20
  -2  -6  -8   19.46    1.09
  -2  -6  -7    3.32    0.26
  -2  -6  -6    9.26    0.50
  -2  -6  -5    0.76    0.32
  -2  -5 -12    9.23    0.42
  -2  -5 -11    1.75    0.24
  -2  -5 -10    2.15    0.30
  -2  -5  -9   14.02    1.02
  -2  -5  -8    0.47    0.25
  -2  -5  -7    4.74    0.42
  -2  -5  -6    6.02    0.27
  -2  -4 -13    1.84    0.22
  -2  -4 -12    3.09    0.25
  -2  -4 -11    0.17    0.13
  -2  -4 -10    3.15    0.23
  -2  -4  -9    1.67    0.39
  -2  -4  -8    1.34    0.35
  -2  -4  -7   13.50    0.71
  -2  -4  -6   25.50    1.30
  -2  -4  -5   18.97    1.11
  -2  -4  -4    1.79    0.24
  -2  -4  -3    1.48    0.73
  -2  -4  -2   17.17    0.43
  -2  -4  -1    5.16    0.26
  -2  -3 -13    1.52    0.18
  -2  -3 -12    1.18    0.16
  -2  -3 -11    0.88    0.17
  -2  -3 -10    3.27    0.25
  -2  -3  -9    0.41    0.13
  -2  -3  -8    6.37    0.16
  -2  -3  -7    1.67    0.42
  -2  -3  -6   23.39    0.96
  -2  -3  -5   37.71    2.22
  -2  -3  -4    2.63    0.25
  -2  -3  -3   17.18    1.12
  -2  -3  -2   17.78    1.12
  -2  -3  -1   63.09    1.52
  -2  -2 -14    2.73    0.16
  -2  -2 -13    1.58    0.21
  -2  -2 -12    4.48    0.35
  -2  -2 -11    0.31    0.15
  -2  -2 -10    2.77    0.18
  -2  -2  -9    4.90    0.22
  -2  -2  -8    0.63    0.11
  -2  -2  -7   19.89    0.49
  -2  -2  -6   26.98    0.61
  -2  -2  -5   53.39    1.11
  -2  -2  -4    4.00    0.91
  -2  -2  -3    9.91    0.53
  -2  -2  -2    8.52    0.61
  -2  -2  -1   80.59    2.91
  -2  -1 -15    1.23    0.18
  -2  -1 -14    3.46    0.18
  -2  -1 -13   14.54    0.57
  -2  -1 -12    1.31    0.38
  -2  -1 -11    0.38    0.36
  -2  -1 -10    0.37    0.08
  -2  -1  -9    2.23    0.06
  -2  -1  -8    2.46    0.10
  -2  -1  -7    0.16    0.11
  -2  -1  -6    0.17    0.27
  -2  -1  -5    4.86    0.50
  -2  -1  -4   15.00    0.48
  -2  -1  -3   73.92    1.82
  -2  -1  -2   54.94    2.78
  -2  -1   5    1.53    0.96
  -2  -1   6   45.19    1.94
  -2   0 -15    1.79    0.17
  -2   0 -14    1.83    0.16
  -2   0 -13    0.05    0.13
  -2   0 -12    0.65    0.12
  -2   0 -11    7.27    0.31
  -2   0 -10    0.20    0.11
  -2   0  -9   22.23    0.24
  -2   0  -8   20.70    0.57
  -2   0  -7   11.54    0.53
  -2   0  -6    7.96    0.15
  -2   0  -5   35.47    0.74
  -2   0  -4  228.94    6.02
  -2   0  -3  139.33    3.41
  -2   0  -2   12.28    0.37
  -2   0   4   21.19    0.39
  -2   0   5   32.94    0.32
  -2   0   6  113.92    2.79
  -2   1 -16    2.31    0.17
  -2   1 -15    0.78    0.14
  -2   1 -14    8.31    0.62
  -2   1 -13    4.31    0.31
  -2   1 -12    1.66    0.25
  -2   1 -11    1.35    0.11
  -2   1 -10   37.42    0.37
  -2   1  -9   32.82    1.02
  -2   1  -8    3.59    0.18
  -2   1  -7   23.04    0.97
  -2   1  -6   45.78    1.58
  -2   1  -5   43.77    2.00
  -2   1  -4   78.83    1.82
  -2   1  -3   81.82    3.05
  -2   1  -2   30.43    0.39
  -2   1  -1   41.49    0.34
  -2   1   2  113.52    3.34
  -2   1   3   15.57    0.30
  -2   1   4  180.47    7.96
  -2   1   5    0.52    0.51
  -2   1   6    3.02    0.13
  -2   1   7   19.60    0.28
  -2   2 -16    0.15    0.09
  -2   2 -15    0.54    0.13
  -2   2 -14    2.84    0.27
  -2   2 -13    1.65    0.12
  -2   2 -12    6.74    0.25
  -2   2 -11   30.95    1.03
  -2   2 -10   18.75    0.74
  -2   2  -9   45.73    1.13
  -2   2  -8    5.95    0.43
  -2   2  -7    9.53    0.65
  -2   2  -6   25.27    0.56
  -2   2  -5    1.99    0.58
  -2   2  -4   45.07    1.69
  -2   2  -3    8.60    0.30
  -2   2  -2   26.93    0.30
  -2   2  -1   47.25    4.90
  -2   2   0  135.34    6.06
  -2   2   1   42.58    3.41
  -2   2   2  240.13    6.80
  -2   2   3  113.43    2.51
  -2   2   4   34.10    0.27
  -2   2   5    4.40    0.29
  -2   2   6   16.78    0.91
  -2   2   7    8.33    0.91
  -2   3 -16    0.42    0.15
  -2   3 -15    1.61    0.12
  -2   3 -14    7.37    0.58
  -2   3 -13    0.94    0.13
  -2   3 -12    6.88    0.21
  -2   3 -11    2.12    0.31
  -2   3 -10   11.97    0.87
  -2   3  -9   11.89    0.95
  -2   3  -8   12.77    0.58
  -2   3  -7    0.36    0.31
  -2   3  -6   10.67    0.19
  -2   3  -5   26.85    0.38
  -2   3  -4    6.13    1.67
  -2   3  -3  125.39    0.76
  -2   3  -2    4.64    0.24
  -2   3  -1   10.04    1.21
  -2   3   0   26.28    0.17
  -2   3   1  223.81   10.63
  -2   3   2  223.18    8.74
  -2   3   3   32.31    1.18
  -2   3   4    7.33    0.16
  -2   3   5    4.02    0.67
  -2   3   6   52.97    1.29
  -2   3   7    6.90    0.39
  -2   3   8    0.09    0.20
  -2   4 -17    0.74    0.16
  -2   4 -16    3.30    0.32
  -2   4 -15    1.33    0.23
  -2   4 -14    2.80    0.23
  -2   4 -13    0.02    0.19
  -2   4 -12    5.57    0.16
  -2   4 -11   12.79    0.24
  -2   4 -10    8.09    0.58
  -2   4  -9   18.08    0.74
  -2   4  -8    5.54    0.42
  -2   4  -7   23.28    0.24
  -2   4  -6   13.62    0.17
  -2   4  -5  147.54    2.79
  -2   4  -4   24.12    2.22
  -2   4  -3   73.26    3.20
  -2   4  -2   14.47    0.59
  -2   4  -1   20.05    2.58
  -2   4   0   92.53    4.13
  -2   4   1  135.33    3.56
  -2   4   2   23.78    1.46
  -2   4   3   22.35    0.65
  -2   4   4   17.68    0.84
  -2   4   5    0.96    0.87
  -2   4   6   14.95    1.49
  -2   4   7    5.63    0.21
  -2   4   8    0.04    0.20
  -2   5 -17    0.24    0.13
  -2   5 -16    0.17    0.09
  -2   5 -15    1.27    0.25
  -2   5 -14    1.45    0.21
  -2   5 -13    7.94    0.14
  -2   5 -12   11.78    0.22
  -2   5 -11   19.64    0.38
  -2   5 -10    7.28    0.30
  -2   5  -9   12.40    0.94
  -2   5  -8    6.73    0.21
  -2   5  -7  152.82    7.79
  -2   5  -6   15.69    1.25
  -2   5  -5   70.09    4.23
  -2   5  -4   64.68    1.25
  -2   5  -3    8.81    0.63
  -2   5  -2   15.24    0.49
  -2   5  -1   51.00    0.51
  -2   5   0    1.52    0.60
  -2   5   1   50.42    2.74
  -2   5   2    8.19    0.47
  -2   5   3   40.58    1.92
  -2   5   4    0.56    0.19
  -2   5   5   21.78    1.31
  -2   5   6    9.63    1.19
  -2   5   7    6.81    0.22
  -2   5   8   10.13    0.45
  -2   5   9    0.79    0.23
  -2   6 -17    0.86    0.10
  -2   6 -16    0.80    0.17
  -2   6 -15    1.13    0.21
  -2   6 -14    7.45    0.28
  -2   6 -13   22.18    0.66
  -2   6 -12   14.37    0.50
  -2   6 -11   15.82    0.35
  -2   6 -10    2.08    0.13
  -2   6  -9   22.63    0.61
  -2   6  -8    9.35    0.16
  -2   6  -7   10.34    0.16
  -2   6  -6   11.84    1.11
  -2   6  -5    0.61    0.31
  -2   6  -4   67.96    4.10
  -2   6  -3   10.60    0.22
  -2   6  -2   23.23    0.29
  -2   6  -1   25.04    1.61
  -2   6   0   18.01    0.18
  -2   6   1   16.33    2.34
  -2   6   2    9.13    0.18
  -2   6   3    3.58    0.52
  -2   6   4    2.54    0.35
  -2   6   5   10.97    0.32
  -2   6   6   13.86    0.38
  -2   6   7    7.83    0.46
  -2   6   8   23.81    0.83
  -2   6   9    4.06    0.38
  -2   6  10    3.12    0.19
  -2   7 -17    4.24    0.21
  -2   7 -16    0.82    0.10
  -2   7 -15    8.76    0.19
  -2   7 -14   10.80    0.81
  -2   7 -13   22.86    0.30
  -2   7 -12   17.16    0.60
  -2   7 -11    8.47    0.14
  -2   7 -10    4.30    0.22
  -2   7  -9   26.80    0.98
  -2   7  -8   39.37    2.11
  -2   7  -7   19.75    0.22
  -2   7  -6   98.55    1.63
  -2   7  -5    0.92    0.21
  -2   7  -4   26.70    0.24
  -2   7  -3   53.88    3.45
  -2   7  -2   11.45    0.19
  -2   7  -1   26.41    0.68
  -2   7   0   41.00    0.89
  -2   7   1    5.38    0.43
  -2   7   2    0.10    0.22
  -2   7   3    4.12    0.51
  -2   7   4    7.14    0.42
  -2   7   5    7.23    0.29
  -2   7   6   12.27    0.41
  -2   7   7    3.01    0.12
  -2   7   8    8.55    0.58
  -2   7   9    1.04    0.17
  -2   7  10    2.73    0.31
  -2   8 -17    1.60    0.18
  -2   8 -16    4.84    0.18
  -2   8 -15    2.79    0.26
  -2   8 -14    0.56    0.16
  -2   8 -13   22.71    0.43
  -2   8 -12    4.21    0.06
  -2   8 -11   10.41    0.41
  -2   8 -10    0.99    0.10
  -2   8  -9    5.84    0.05
  -2   8  -8   17.02    0.21
  -2   8  -7    7.26    0.34
  -2   8  -6   64.97    3.25
  -2   8  -5   16.07    0.53
  -2   8  -4    2.72    0.48
  -2   8  -3   36.47    0.26
  -2   8  -2  166.90    8.21
  -2   8  -1   15.08    0.58
  -2   8   0    9.86    0.30
  -2   8   1    4.21    0.09
  -2   8   2    4.77    0.13
  -2   8   3   13.69    0.13
  -2   8   4    0.88    0.08
  -2   8   5    0.95    0.17
  -2   8   6    1.19    0.27
  -2   8   7    7.42    0.56
  -2   8   8   15.10    0.58
  -2   8   9    1.63    0.23
  -2   8  10   11.79    0.50
  -2   9 -18    1.15    0.12
  -2   9 -17    3.03    0.16
  -2   9 -16    0.11    0.12
  -2   9 -15    1.64    0.22
  -2   9 -14    1.87    0.15
  -2   9 -13   16.03    0.49
  -2   9 -12    1.36    0.09
  -2   9 -11    7.57    0.08
  -2   9 -10    4.14    0.15
  -2   9  -9    3.97    0.12
  -2   9  -8  131.60    2.31
  -2   9  -7    9.39    0.76
  -2   9  -6   40.68    0.85
  -2   9  -5   34.39    1.86
  -2   9  -4  105.57    4.20
  -2   9  -3   28.40    0.44
  -2   9  -2   11.64    0.25
  -2   9  -1    6.90    0.41
  -2   9   0    2.84    0.21
  -2   9   1   25.11    0.50
  -2   9   2    6.83    0.42
  -2   9   3    5.05    0.10
  -2   9   4   13.22    0.78
  -2   9   5    2.10    0.33
  -2   9   6    1.24    0.19
  -2   9   7    2.37    0.21
  -2   9   8    6.63    0.44
  -2   9   9    1.21    0.17
  -2  10 -18    4.96    0.24
  -2  10 -17    0.39    0.12
  -2  10 -16    9.62    0.81
  -2  10 -15    1.74    0.11
  -2  10 -14    4.09    0.08
  -2  10 -13    2.75    0.10
  -2  10 -12    6.20    0.15
  -2  10 -11    9.09    0.26
  -2  10 -10   40.70    0.40
  -2  10  -9    9.79    0.29
  -2  10  -8   45.08    0.61
  -2  10  -7   42.77    0.78
  -2  10  -6    2.93    0.10
  -2  10  -5    2.35    0.19
  -2  10  -4   36.78    0.63
  -2  10  -3   12.03    0.67
  -2  10  -2   14.08    0.28
  -2  10  -1   18.25    0.33
  -2  10   0    3.01    0.21
  -2  10   1    7.37    0.16
  -2  10   2   19.61    0.81
  -2  10   3    2.70    0.29
  -2  10   4    1.36    0.23
  -2  10   5    6.60    0.41
  -2  10   6    5.67    0.49
  -2  10   7    5.91    0.28
  -2  10   8    0.41    0.15
  -2  11 -18    0.02    0.08
  -2  11 -17    1.53    0.16
  -2  11 -16    6.63    0.24
  -2  11 -15    5.75    0.16
  -2  11 -14    8.52    0.22
  -2  11 -13    5.90    0.11
  -2  11 -12    4.75    0.18
  -2  11 -11    0.60    0.13
  -2  11 -10   26.01    0.70
  -2  11  -9   24.49    0.32
  -2  11  -8    1.23    0.08
  -2  11  -7   33.12    0.46
  -2  11  -6    8.45    0.18
  -2  11  -5    0.11    0.19
  -2  11  -4   12.62    0.07
  -2  11  -3   10.88    0.16
  -2  11  -2   12.78    0.25
  -2  11  -1   20.67    0.53
  -2  11   0    2.20    0.13
  -2  11   1    3.12    0.32
  -2  11   2    2.24    0.25
  -2  11   3   14.30    0.85
  -2  11   4   17.20    0.59
  -2  11   5    2.38    0.33
  -2  11   7    1.28    0.23
  -2  12 -17    2.89    0.30
  -2  12 -16    0.32    0.12
  -2  12 -15    1.89    0.09
  -2  12 -14    0.77    0.08
  -2  12 -13    3.43    0.15
  -2  12 -12    8.74    0.20
  -2  12 -11    5.92    0.56
  -2  12 -10    4.63    0.10
  -2  12  -9   28.28    0.58
  -2  12  -8    4.21    0.13
  -2  12  -7   14.42    0.17
  -2  12  -6   39.51    0.52
  -2  12  -5   30.05    0.35
  -2  12  -4   28.87    0.91
  -2  12  -3   16.64    0.25
  -2  12  -2    3.06    0.10
  -2  12  -1    2.35    0.10
  -2  12   0    7.46    0.26
  -2  12   1   13.02    0.71
  -2  12   2    2.26    0.18
  -2  12   3    1.06    0.17
  -2  12   4    1.50    0.33
  -2  12   5    0.24    0.13
  -2  12   6    1.23    0.13
  -2  13 -17    1.45    0.23
  -2  13 -16    0.26    0.09
  -2  13 -15    4.60    0.16
  -2  13 -14    2.82    0.15
  -2  13 -13    1.22    0.13
  -2  13 -12    2.55    0.09
  -2  13 -11    1.40    0.12
  -2  13 -10    2.27    0.20
  -2  13  -9   24.31    0.42
  -2  13  -8    9.31    0.38
  -2  13  -7    0.80    0.14
  -2  13  -6    2.64    0.16
  -2  13  -5    1.66    0.10
  -2  13  -4    3.80    0.14
  -2  13  -3    8.46    0.27
  -2  13  -2    6.02    0.16
  -2  13  -1    1.54    0.29
  -2  13   0    2.19    0.18
  -2  13   1    2.82    0.13
  -2  13   2    0.57    0.08
  -2  13   3    0.32    0.11
  -2  13   4    6.56    0.38
  -2  13   5    3.25    0.25
  -2  14 -17    0.31    0.10
  -2  14 -16    1.90    0.13
  -2  14 -15    2.77    0.12
  -2  14 -14    3.88    0.12
  -2  14 -13    2.97    0.10
  -2  14 -12    9.90    0.39
  -2  14 -11   30.53    0.60
  -2  14 -10    2.66    0.25
  -2  14  -9    2.92    0.17
  -2  14  -8    5.81    0.12
  -2  14  -7   20.90    0.70
  -2  14  -6    4.91    0.13
  -2  14  -5   12.90    0.37
  -2  14  -4    6.98    0.18
  -2  14  -3    2.09    0.09
  -2  14  -2    4.27    0.30
  -2  14  -1    1.39    0.19
  -2  14   0    3.52    0.20
  -2  14   1    1.78    0.08
  -2  14   2    2.18    0.24
  -2  14   3    0.05    0.08
  -2  14   4    0.48    0.12
  -2  15 -16    2.57    0.18
  -2  15 -15    2.38    0.07
  -2  15 -14    0.98    0.06
  -2  15 -13   13.37    0.31
  -2  15 -12    5.88    0.32
  -2  15 -11   13.07    0.28
  -2  15 -10    8.33    0.35
  -2  15  -9    6.24    0.24
  -2  15  -8    5.93    0.18
  -2  15  -7    4.68    0.23
  -2  15  -6   10.46    0.42
  -2  15  -5    0.48    0.13
  -2  15  -4    9.84    0.37
  -2  15  -3    1.27    0.11
  -2  15  -2    1.82    0.09
  -2  15  -1   10.92    0.38
  -2  15   0    1.10    0.12
  -2  15   1    0.06    0.11
  -2  15   2    0.58    0.12
  -2  16 -16    2.11    0.16
  -2  16 -15    2.27    0.07
  -2  16 -14    0.59    0.07
  -2  16 -13    4.42    0.11
  -2  16 -12    9.16    0.30
  -2  16 -11    4.23    0.26
  -2  16 -10   11.98    0.22
  -2  16  -9    7.30    0.16
  -2  16  -8    5.73    0.27
  -2  16  -7   11.01    0.36
  -2  16  -6    2.76    0.07
  -2  16  -5    1.52    0.11
  -2  16  -4    6.06    0.32
  -2  16  -3    6.52    0.49
  -2  16  -2    1.22    0.14
  -2  16  -1    1.75    0.08
  -2  16   0    2.15    0.11
  -2  17 -15    1.70    0.24
  -2  17 -14    1.28    0.08
  -2  17 -13    0.44    0.07
  -2  17 -12    4.39    0.11
  -2  17 -11    1.54    0.13
  -2  17 -10    1.17    0.08
  -2  17  -9    0.79    0.08
  -2  17  -8    7.45    0.20
  -2  17  -7   18.01    0.40
  -2  17  -6   12.25    0.31
  -2  17  -5    0.82    0.08
  -2  17  -4    1.37    0.16
  -2  17  -3    2.45    0.10
  -2  17  -2    4.08    0.22
  -2  18 -13    2.61    0.20
  -2  18 -12    1.29    0.19
  -2  18 -11    0.95    0.06
  -2  18 -10    1.33    0.09
  -2  18  -9    4.68    0.17
  -2  18  -8    4.51    0.12
  -2  18  -7    2.34    0.12
  -2  18  -6    1.51    0.06
  -2  18  -5    0.62    0.11
  -2  18  -4    1.16    0.20
  -1  -8 -10    0.86    0.21
  -1  -8  -9    3.44    0.29
  -1  -8  -8    3.29    0.25
  -1  -8  -7    8.81    0.29
  -1  -8  -6    2.05    0.44
  -1  -7 -11    2.98    0.28
  -1  -7 -10    6.04    0.34
  -1  -7  -9    1.90    0.24
  -1  -7  -8    8.44    0.41
  -1  -7  -7    5.13    0.53
  -1  -7  -6    1.26    0.41
  -1  -7  -5    3.74    0.60
  -1  -6 -11    0.43    0.17
  -1  -6 -10    0.42    0.23
  -1  -6  -9    1.44    0.29
  -1  -6  -8    0.23    0.23
  -1  -6  -7    8.54    0.55
  -1  -6  -6   17.22    1.02
  -1  -6  -5    4.78    0.31
  -1  -5 -12    0.31    0.16
  -1  -5 -11    6.29    0.33
  -1  -5 -10    0.95    0.23
  -1  -5  -9    3.38    0.33
  -1  -5  -8   28.87    1.60
  -1  -5  -7    3.75    0.32
  -1  -5  -6   19.53    0.91
  -1  -5  -3   20.09    1.32
  -1  -5  -2  128.97    2.23
  -1  -4 -13    0.36    0.18
  -1  -4 -12    0.23    0.11
  -1  -4 -11    2.00    0.20
  -1  -4 -10    6.64    0.33
  -1  -4  -9    7.25    0.62
  -1  -4  -8   47.41    0.80
  -1  -4  -7    7.18    0.30
  -1  -4  -6    7.26    0.28
  -1  -4  -5  162.73    4.67
  -1  -4  -4   19.41    0.82
  -1  -4  -3   69.85    3.27
  -1  -4  -2   72.24    4.01
  -1  -4  -1    1.49    0.19
  -1  -3 -14    1.81    0.13
  -1  -3 -13    0.02    0.11
  -1  -3 -12    0.18    0.12
  -1  -3 -11    3.70    0.19
  -1  -3 -10    1.11    0.13
  -1  -3  -9    0.78    0.10
  -1  -3  -8   14.74    0.67
  -1  -3  -7    8.56    0.41
  -1  -3  -6    6.91    0.22
  -1  -3  -5   14.19    0.17
  -1  -3  -4    4.28    0.30
  -1  -3  -3    3.52    0.15
  -1  -3  -2  119.82    1.81
  -1  -3  -1   22.95    0.78
  -1  -2 -14    0.63    0.25
  -1  -2 -13    0.86    0.12
  -1  -2 -12    1.32    0.19
  -1  -2 -11    1.60    0.15
  -1  -2 -10   10.94    0.27
  -1  -2  -9    3.11    0.13
  -1  -2  -8    0.27    0.10
  -1  -2  -7    7.04    0.49
  -1  -2  -6   96.19    3.22
  -1  -2  -5  111.58    3.21
  -1  -2  -4   30.08    0.37
  -1  -2  -3  359.44    6.26
  -1  -2  -2    8.75    2.43
  -1  -1 -15    0.13    0.09
  -1  -1 -14    0.59    0.13
  -1  -1 -13    3.62    0.23
  -1  -1 -12    7.99    0.30
  -1  -1 -11    3.72    0.42
  -1  -1 -10    0.57    0.13
  -1  -1  -9    4.83    0.14
  -1  -1  -8    3.66    0.08
  -1  -1  -7    8.04    0.35
  -1  -1  -6  117.79    3.68
  -1  -1  -5   84.25    2.89
  -1  -1  -4   29.48    0.47
  -1  -1  -3   88.74    2.44
  -1  -1  -2  170.17   11.58
  -1  -1   5  115.47    3.42
  -1  -1   6  119.10    3.08
  -1   0 -15    0.43    0.12
  -1   0 -14    4.88    0.29
  -1   0 -13    0.33    0.14
  -1   0 -12    0.10    0.21
  -1   0 -11   13.18    0.38
  -1   0 -10    6.79    0.24
  -1   0  -9   37.92    0.74
  -1   0  -8    3.54    0.27
  -1   0  -7    2.06    0.29
  -1   0  -6   22.56    0.20
  -1   0  -5   20.74    0.30
  -1   0  -4   34.78    1.04
  -1   0  -3   17.57    0.45
  -1   0  -2   21.94    1.68
  -1   0   4   15.15    0.76
  -1   0   5    8.96    0.39
  -1   0   6   36.51    1.37
  -1   0   7   28.82    0.96
  -1   1 -16    5.08    0.33
  -1   1 -15    1.15    0.15
  -1   1 -14    1.29    0.25
  -1   1 -13    4.27    0.15
  -1   1 -12    7.05    0.37
  -1   1 -11   16.98    0.54
  -1   1 -10   17.74    0.42
  -1   1  -9    1.81    0.10
  -1   1  -8   27.98    0.96
  -1   1  -7   22.68    0.65
  -1   1  -6   24.18    0.44
  -1   1  -5   68.26    0.80
  -1   1  -4   30.87    1.91
  -1   1  -3   12.87    0.18
  -1   1  -2   35.07    1.09
  -1   1   2  149.01    0.80
  -1   1   3   47.96    0.21
  -1   1   4   72.97    3.65
  -1   1   5   36.20    0.60
  -1   1   6   69.56    2.14
  -1   1   7   42.80    1.48
  -1   1   8   29.18    2.10
  -1   2 -16    1.32    0.12
  -1   2 -15    1.39    0.20
  -1   2 -14    3.45    0.17
  -1   2 -13    0.23    0.18
  -1   2 -12    0.62    0.15
  -1   2 -11    1.80    0.15
  -1   2 -10    4.67    0.38
  -1   2  -9   14.85    0.58
  -1   2  -8   40.10    1.05
  -1   2  -7   14.53    0.68
  -1   2  -6    0.97    0.17
  -1   2  -5   14.79    0.80
  -1   2  -4   59.53    0.87
  -1   2  -3  223.27   13.36
  -1   2  -2   37.37    0.95
  -1   2  -1   23.15    0.40
  -1   2   0    8.81    1.08
  -1   2   1   30.86    1.63
  -1   2   2  179.20   14.08
  -1   2   3  527.06   24.43
  -1   2   4   58.49    0.77
  -1   2   5    7.32    0.20
  -1   2   6   11.16    0.26
  -1   2   7  107.09    3.81
  -1   2   8    2.06    0.17
  -1   3 -17    0.71    0.18
  -1   3 -16    4.16    0.30
  -1   3 -15    0.52    0.23
  -1   3 -14   19.57    0.52
  -1   3 -13   15.56    0.82
  -1   3 -12    2.72    0.23
  -1   3 -11   27.91    0.39
  -1   3 -10   17.57    0.39
  -1   3  -9   97.43    5.11
  -1   3  -8   41.09    1.52
  -1   3  -7   11.16    0.48
  -1   3  -6    1.09    0.10
  -1   3  -5  172.25    5.20
  -1   3  -4  130.14    6.73
  -1   3  -3    3.82    0.67
  -1   3  -2   19.33    0.81
  -1   3  -1  182.48    8.53
  -1   3   0   46.76    1.39
  -1   3   1  113.21    3.59
  -1   3   2   39.43    2.17
  -1   3   3    7.73    0.34
  -1   3   4   59.93    0.89
  -1   3   5    0.24    0.62
  -1   3   6   75.39    4.03
  -1   3   7   48.53    0.79
  -1   3   8    2.86    0.18
  -1   4 -17    3.65    0.19
  -1   4 -16    1.67    0.25
  -1   4 -15    8.09    0.38
  -1   4 -14    7.72    0.45
  -1   4 -13    0.79    0.08
  -1   4 -12    0.76    0.18
  -1   4 -11    0.54    0.09
  -1   4 -10   14.84    0.27
  -1   4  -9    3.47    0.62
  -1   4  -8   36.11    2.48
  -1   4  -7    9.82    0.17
  -1   4  -6   27.72    0.70
  -1   4  -5  247.42   10.26
  -1   4  -4   94.53    1.55
  -1   4  -3   25.69    0.66
  -1   4  -2   10.69    1.83
  -1   4  -1  275.72    3.08
  -1   4   0   12.98    0.21
  -1   4   1   13.69    1.45
  -1   4   2   46.58    0.79
  -1   4   3   11.34    0.93
  -1   4   4   54.43    2.70
  -1   4   5  149.47    5.99
  -1   4   6    9.00    0.21
  -1   4   7    1.95    0.19
  -1   4   8   31.03    0.57
  -1   4   9    2.42    0.31
  -1   5 -17    0.06    0.10
  -1   5 -16    4.12    0.21
  -1   5 -15    0.87    0.11
  -1   5 -14    3.66    0.34
  -1   5 -13   11.15    0.35
  -1   5 -12    3.55    0.13
  -1   5 -11    0.21    0.10
  -1   5 -10   18.75    1.02
  -1   5  -9   81.32    1.45
  -1   5  -8    9.31    0.18
  -1   5  -7    1.18    0.55
  -1   5  -6   36.79    0.96
  -1   5  -5   83.46    4.37
  -1   5  -4   45.00    1.85
  -1   5  -3   48.47    1.72
  -1   5  -2  351.60   12.19
  -1   5  -1    0.00    0.34
  -1   5   0   31.49    0.48
  -1   5   1   10.10    0.52
  -1   5   2   71.32    0.81
  -1   5   3   46.98    1.24
  -1   5   4   15.06    0.50
  -1   5   5   28.75    0.54
  -1   5   6   10.30    0.11
  -1   5   7   16.69    1.09
  -1   5   8   61.22    2.01
  -1   5   9    0.68    0.18
  -1   5  10    2.08    0.26
  -1   6 -17    0.56    0.08
  -1   6 -16    0.54    0.11
  -1   6 -15   14.17    0.36
  -1   6 -14    2.03    0.10
  -1   6 -13    1.17    0.09
  -1   6 -12   24.74    0.54
  -1   6 -11    0.64    0.13
  -1   6 -10   21.59    0.98
  -1   6  -9   47.10    1.74
  -1   6  -8   80.68    3.37
  -1   6  -7   19.24    0.78
  -1   6  -6   67.39    3.24
  -1   6  -5   20.49    0.41
  -1   6  -4   54.28    2.85
  -1   6  -3    2.92    0.18
  -1   6  -2   61.85    2.49
  -1   6  -1    1.26    0.17
  -1   6   0   23.20    0.24
  -1   6   1   17.97    0.06
  -1   6   2   57.77    2.13
  -1   6   3    0.26    0.21
  -1   6   4    8.91    0.44
  -1   6   5    6.66    0.21
  -1   6   6   95.25    1.78
  -1   6   7   47.60    1.20
  -1   6   8    1.88    0.16
  -1   6   9    1.58    0.17
  -1   6  10    3.53    0.29
  -1   6  11    5.40    0.38
  -1   7 -18    0.31    0.11
  -1   7 -17    2.30    0.18
  -1   7 -16    0.35    0.09
  -1   7 -15   10.83    0.42
  -1   7 -14    1.08    0.13
  -1   7 -13    3.40    0.09
  -1   7 -12    0.75    0.06
  -1   7 -11    4.02    0.15
  -1   7 -10   10.43    0.21
  -1   7  -9   52.09    1.29
  -1   7  -8    8.29    0.24
  -1   7  -7    1.50    0.29
  -1   7  -6    6.79    0.19
  -1   7  -5   41.85    1.55
  -1   7  -4    7.81    0.42
  -1   7  -3   14.81    1.09
  -1   7  -2  140.23    4.76
  -1   7  -1   84.40    2.41
  -1   7   0    2.09    0.09
  -1   7   1   12.94    0.13
  -1   7   2    6.79    0.11
  -1   7   3    1.36    0.10
  -1   7   4   20.06    0.36
  -1   7   5    9.54    0.24
  -1   7   6    1.52    0.18
  -1   7   7    3.92    0.17
  -1   7   8    3.13    0.21
  -1   7   9    0.61    0.19
  -1   7  10    7.83    0.44
  -1   7  11    0.10    0.12
  -1   8 -18    0.55    0.11
  -1   8 -17    7.89    0.23
  -1   8 -16    2.55    0.17
  -1   8 -15    1.18    0.14
  -1   8 -14   18.43    0.55
  -1   8 -13    0.06    0.09
  -1   8 -12    1.18    0.05
  -1   8 -11    6.81    0.12
  -1   8 -10    1.42    0.06
  -1   8  -9   12.67    0.15
  -1   8  -8   12.98    0.34
  -1   8  -7   19.37    0.16
  -1   8  -6    0.39    0.29
  -1   8  -5    7.04    0.40
  -1   8  -4   85.99    1.96
  -1   8  -3    3.75    0.32
  -1   8  -2   53.81    2.12
  -1   8  -1    4.28    0.21
  -1   8   0    3.76    0.25
  -1   8   1   16.91    0.71
  -1   8   2   12.02    0.39
  -1   8   3    1.57    0.09
  -1   8   4    4.34    0.12
  -1   8   5   12.87    0.36
  -1   8   6    3.26    0.18
  -1   8   7    0.40    0.20
  -1   8   8    7.60    0.50
  -1   8   9    2.33    0.29
  -1   8  10    0.41    0.13
  -1   9 -18    7.03    0.32
  -1   9 -17    3.47    0.23
  -1   9 -16    2.58    0.15
  -1   9 -15    1.54    0.10
  -1   9 -14    2.35    0.11
  -1   9 -13    8.52    0.29
  -1   9 -12   12.37    0.28
  -1   9 -11    4.45    0.06
  -1   9 -10    8.55    0.10
  -1   9  -9   47.32    0.94
  -1   9  -8   35.74    0.90
  -1   9  -7   13.74    0.43
  -1   9  -6    1.16    0.16
  -1   9  -5   13.15    0.63
  -1   9  -4    4.20    0.52
  -1   9  -3   31.07    0.55
  -1   9  -2    2.69    0.35
  -1   9  -1   29.59    1.69
  -1   9   0    0.43    0.08
  -1   9   1    4.24    0.14
  -1   9   2   30.01    0.48
  -1   9   3    1.81    0.35
  -1   9   4    1.96    0.32
  -1   9   5    0.43    0.22
  -1   9   6    2.80    0.31
  -1   9   7    1.97    0.20
  -1   9   8    3.94    0.32
  -1   9   9    0.76    0.17
  -1  10 -18    0.79    0.11
  -1  10 -17    0.68    0.15
  -1  10 -16    6.23    0.20
  -1  10 -15    1.82    0.11
  -1  10 -14   17.14    0.38
  -1  10 -13   15.42    0.50
  -1  10 -12    4.95    0.11
  -1  10 -11    7.02    0.11
  -1  10 -10   74.76    1.60
  -1  10  -9   24.43    0.38
  -1  10  -8   14.18    0.32
  -1  10  -7   13.94    0.63
  -1  10  -6   16.02    0.12
  -1  10  -5   28.14    0.43
  -1  10  -4   17.31    1.11
  -1  10  -3    2.32    0.08
  -1  10  -2   20.63    0.76
  -1  10  -1   10.73    0.27
  -1  10   0    7.33    0.22
  -1  10   1    8.89    0.29
  -1  10   2   17.84    0.58
  -1  10   3   12.58    0.36
  -1  10   4    1.95    0.31
  -1  10   5    0.17    0.18
  -1  10   6    0.56    0.20
  -1  10   7    0.82    0.26
  -1  10   8    1.19    0.22
  -1  11 -18    9.67    0.45
  -1  11 -17    1.02    0.08
  -1  11 -16    1.94    0.12
  -1  11 -15    2.08    0.28
  -1  11 -14    8.60    0.19
  -1  11 -13    4.19    0.35
  -1  11 -12   23.37    0.29
  -1  11 -11   10.18    0.19
  -1  11 -10    3.26    0.11
  -1  11  -9   11.44    0.31
  -1  11  -8    2.18    0.05
  -1  11  -7    4.50    0.29
  -1  11  -6    8.62    0.38
  -1  11  -5    0.06    0.05
  -1  11  -4    9.45    0.59
  -1  11  -3   10.10    0.17
  -1  11  -2   11.63    0.13
  -1  11  -1    0.55    0.08
  -1  11   0    5.80    0.14
  -1  11   1   14.04    0.36
  -1  11   2   21.86    1.38
  -1  11   3   10.63    1.01
  -1  11   4    1.90    0.12
  -1  11   5    0.78    0.19
  -1  11   6    2.45    0.18
  -1  11   7    1.93    0.17
  -1  12 -18    4.06    0.13
  -1  12 -17    0.49    0.07
  -1  12 -16    3.25    0.10
  -1  12 -15   16.50    0.42
  -1  12 -14    2.63    0.08
  -1  12 -13   15.76    0.30
  -1  12 -12   16.85    0.72
  -1  12 -11    2.63    0.19
  -1  12 -10    5.28    0.08
  -1  12  -9   15.37    0.54
  -1  12  -8   15.76    0.30
  -1  12  -7   20.16    0.30
  -1  12  -6   10.61    0.25
  -1  12  -5   17.33    0.26
  -1  12  -4   27.62    0.63
  -1  12  -3   16.32    0.57
  -1  12  -2   18.16    0.44
  -1  12  -1    3.53    0.11
  -1  12   0    4.36    0.15
  -1  12   1    4.75    0.38
  -1  12   2    6.80    0.12
  -1  12   3    1.06    0.13
  -1  12   5    0.82    0.17
  -1  12   6    0.82    0.14
  -1  13 -17    0.44    0.05
  -1  13 -16    0.63    0.09
  -1  13 -15    0.40    0.06
  -1  13 -14    4.43    0.27
  -1  13 -13    4.04    0.07
  -1  13 -12    1.73    0.14
  -1  13 -11   11.16    0.18
  -1  13 -10    0.25    0.09
  -1  13  -9    8.91    0.24
  -1  13  -8    7.01    0.25
  -1  13  -7    2.36    0.05
  -1  13  -6    8.43    0.23
  -1  13  -5   13.84    0.41
  -1  13  -4    2.82    0.07
  -1  13  -3    6.67    0.14
  -1  13  -2   11.02    0.47
  -1  13  -1    4.35    0.17
  -1  13   0   15.35    0.29
  -1  13   1    4.31    0.24
  -1  13   2    4.50    0.15
  -1  13   3    6.67    0.28
  -1  13   4    1.98    0.27
  -1  13   5    0.93    0.14
  -1  14 -17    2.56    0.11
  -1  14 -16    0.27    0.05
  -1  14 -15    0.12    0.07
  -1  14 -14    2.20    0.06
  -1  14 -13   21.53    0.36
  -1  14 -12    0.14    0.06
  -1  14 -11    2.62    0.12
  -1  14 -10    3.03    0.06
  -1  14  -9    6.92    0.09
  -1  14  -8    4.00    0.17
  -1  14  -7   18.34    0.24
  -1  14  -6    5.67    0.11
  -1  14  -5    1.34    0.08
  -1  14  -4    0.30    0.08
  -1  14  -3    6.69    0.21
  -1  14  -2    1.77    0.12
  -1  14  -1   10.37    0.33
  -1  14   0    1.71    0.19
  -1  14   1    1.86    0.16
  -1  14   2    0.12    0.09
  -1  14   3    0.56    0.07
  -1  15 -17    5.53    0.29
  -1  15 -16    2.51    0.09
  -1  15 -15    1.89    0.08
  -1  15 -14    3.86    0.07
  -1  15 -13    7.91    0.15
  -1  15 -12    0.80    0.04
  -1  15 -11    0.85    0.06
  -1  15 -10    5.54    0.18
  -1  15  -9    2.29    0.07
  -1  15  -8    3.67    0.12
  -1  15  -7    0.35    0.09
  -1  15  -6    4.59    0.22
  -1  15  -5    0.83    0.07
  -1  15  -4    0.74    0.11
  -1  15  -3    1.39    0.17
  -1  15  -2    3.61    0.23
  -1  15  -1    0.50    0.11
  -1  15   0    0.01    0.09
  -1  15   1    0.29    0.07
  -1  15   2    0.36    0.10
  -1  16 -16    4.69    0.12
  -1  16 -15    5.47    0.15
  -1  16 -14    2.16    0.08
  -1  16 -13    1.79    0.12
  -1  16 -12    3.12    0.11
  -1  16 -11    2.69    0.10
  -1  16 -10    0.71    0.07
  -1  16  -9    1.72    0.07
  -1  16  -8    1.59    0.06
  -1  16  -7    5.27    0.22
  -1  16  -6    2.68    0.06
  -1  16  -5    1.39    0.14
  -1  16  -4    1.51    0.14
  -1  16  -3    0.70    0.14
  -1  16  -2    1.28    0.12
  -1  16  -1    3.27    0.18
  -1  16   0    0.46    0.08
  -1  17 -15    1.35    0.17
  -1  17 -14    5.25    0.16
  -1  17 -13    3.98    0.08
  -1  17 -12    1.95    0.07
  -1  17 -11    0.42    0.09
  -1  17 -10    0.34    0.08
  -1  17  -9    0.59    0.07
  -1  17  -8    6.02    0.10
  -1  17  -7    2.86    0.15
  -1  17  -6    5.85    0.24
  -1  17  -5    6.26    0.14
  -1  17  -4    1.15    0.07
  -1  17  -3    3.33    0.19
  -1  17  -2    0.80    0.07
  -1  18 -13    2.30    0.16
  -1  18 -12    8.72    0.31
  -1  18 -11    1.56    0.07
  -1  18 -10    0.07    0.08
  -1  18  -9    1.85    0.10
  -1  18  -8    1.70    0.17
  -1  18  -7    4.85    0.13
  -1  18  -6    3.44    0.12
  -1  18  -5    2.23    0.15
   0  -8 -10   11.90    0.57
   0  -8  -9    4.19    0.42
   0  -8  -8    0.93    0.24
   0  -8  -7    3.81    0.35
   0  -8  -6    4.98    0.41
   0  -7 -11   12.00    0.55
   0  -7 -10    1.87    0.19
   0  -7  -9    1.01    0.18
   0  -7  -8   12.56    0.49
   0  -7  -7   12.22    0.82
   0  -7  -6    5.23    0.27
   0  -7  -5    0.02    0.32
   0  -6 -12    2.10    0.21
   0  -6 -11    2.80    0.28
   0  -6 -10    4.10    0.31
   0  -6  -9    1.40    0.24
   0  -6  -8   33.82    1.15
   0  -6  -7   35.34    1.38
   0  -6  -6   19.97    1.11
   0  -5 -12    0.50    0.12
   0  -5 -11    1.85    0.19
   0  -5 -10    4.35    0.21
   0  -5  -9    0.97    0.13
   0  -5  -8    5.62    0.44
   0  -5  -7   40.52    1.90
   0  -5  -6   35.41    0.88
   0  -5  -5    8.55    0.36
   0  -5  -4    6.31    0.30
   0  -5  -3   98.05    3.37
   0  -5  -2   57.79    2.17
   0  -5  -1   58.31    1.41
   0  -5   0   10.26    0.18
   0  -4 -13    1.71    0.15
   0  -4 -12    0.04    0.11
   0  -4 -11    3.74    0.26
   0  -4 -10    3.90    0.23
   0  -4  -9    2.54    0.14
   0  -4  -8    7.96    0.31
   0  -4  -7    2.62    0.09
   0  -4  -6   30.27    0.62
   0  -4  -5    7.21    0.53
   0  -4  -4    3.57    0.53
   0  -4  -3  314.42    8.92
   0  -4  -2   45.99    1.73
   0  -4  -1   35.87    1.29
   0  -3 -14    0.15    0.15
   0  -3 -13    0.90    0.15
   0  -3 -12    1.52    0.18
   0  -3 -11    1.41    0.14
   0  -3 -10   10.71    0.20
   0  -3  -9    2.74    0.17
   0  -3  -8    3.28    0.11
   0  -3  -7    6.19    0.34
   0  -3  -6   56.72    2.40
   0  -3  -5  154.79    8.68
   0  -3  -4   18.51    0.23
   0  -3  -3   36.87    0.42
   0  -3  -2   41.29    0.94
   0  -3  -1  335.80   13.81
   0  -2 -14    0.31    0.14
   0  -2 -13    0.93    0.19
   0  -2 -12    6.65    0.31
   0  -2 -11   14.39    0.60
   0  -2 -10    4.14    0.37
   0  -2  -9    1.14    0.09
   0  -2  -8    4.31    0.23
   0  -2  -7   75.15    2.10
   0  -2  -6   21.52    0.39
   0  -2  -5  123.98    1.31
   0  -2  -4   21.29    0.33
   0  -2  -3   27.80    1.51
   0  -2  -2  535.81   14.84
   0  -2   5  188.33    7.78
   0  -2   6  100.01    1.53
   0  -1 -15    1.05    0.11
   0  -1 -14    0.63    0.16
   0  -1 -13    7.09    0.25
   0  -1 -12   13.25    0.55
   0  -1 -11    7.05    0.19
   0  -1 -10   18.23    0.88
   0  -1  -9    5.61    0.23
   0  -1  -8    3.18    0.24
   0  -1  -7    4.08    0.18
   0  -1  -6   87.71    3.36
   0  -1  -5   67.99    2.02
   0  -1  -4   19.39    0.09
   0  -1  -3  453.64   15.93
   0  -1  -2  260.56    3.87
   0  -1   4  114.65    5.82
   0  -1   5   33.76    3.44
   0  -1   6  150.87    8.16
   0  -1   7  142.21    4.41
   0   0 -16    0.53    0.11
   0   0 -15    2.22    0.25
   0   0 -14    5.48    0.28
   0   0 -13    1.20    0.21
   0   0 -12   13.03    0.52
   0   0 -11    3.85    0.35
   0   0 -10   27.63    0.56
   0   0  -9    2.89    0.49
   0   0  -8   15.42    0.47
   0   0  -7   12.17    0.11
   0   0  -6    4.41    1.38
   0   0  -5   43.94    1.36
   0   0  -4  240.43    5.95
   0   0  -3  119.55    1.05
   0   0  -2   24.72    0.30
   0   0  -1   68.60    0.18
   0   0   3  117.75    1.50
   0   0   4  231.80    7.89
   0   0   5   42.30    1.85
   0   0   6    4.05    1.06
   0   0   7    9.29    0.13
   0   0   8   15.68    0.73
   0   1 -16    3.70    0.20
   0   1 -15    1.61    0.23
   0   1 -14    0.10    0.15
   0   1 -13    9.47    0.60
   0   1 -12    8.15    0.24
   0   1 -11    5.36    0.48
   0   1 -10    5.66    0.26
   0   1  -9    1.27    0.13
   0   1  -8   48.48    2.10
   0   1  -7  142.51    3.47
   0   1  -6  164.80    5.97
   0   1  -5   41.17    3.29
   0   1  -4  126.56    4.30
   0   1  -3   47.11    2.83
   0   1  -2   26.06    0.34
   0   1   2  266.78    5.82
   0   1   3  439.59   22.74
   0   1   4   18.91    0.15
   0   1   5   68.14    2.43
   0   1   6   88.23    4.94
   0   1   7    3.94    0.28
   0   1   8    3.54    0.40
   0   2 -16    2.90    0.26
   0   2 -15    0.45    0.14
   0   2 -14    0.57    0.21
   0   2 -13   23.84    0.87
   0   2 -12    2.39    0.23
   0   2 -11    4.15    0.17
   0   2 -10   19.84    1.37
   0   2  -9    3.00    0.12
   0   2  -8  108.87    2.65
   0   2  -7   10.02    0.58
   0   2  -6  107.88    2.49
   0   2  -5  209.36   10.85
   0   2  -4  459.38    9.11
   0   2  -3    1.99    0.12
   0   2   0   66.27    0.03
   0   2   1  103.26    0.47
   0   2   2  560.32   22.53
   0   2   3   27.27    2.19
   0   2   4   20.93    0.56
   0   2   5  127.36    1.37
   0   2   6   21.22    0.47
   0   2   7   79.53    3.24
   0   2   8    3.64    0.33
   0   3 -17    0.74    0.16
   0   3 -16    3.39    0.27
   0   3 -15    5.68    0.52
   0   3 -14   17.31    0.38
   0   3 -13    2.54    0.12
   0   3 -12   11.79    0.13
   0   3 -11    1.42    0.14
   0   3 -10    2.98    0.11
   0   3  -9   32.05    0.73
   0   3  -8  104.23    2.95
   0   3  -7  111.44    4.66
   0   3  -6    7.77    0.10
   0   3  -5  101.03    2.89
   0   3  -4  692.06   23.43
   0   3  -3   28.32    0.21
   0   3  -2   29.04    0.54
   0   3  -1  147.12    1.69
   0   3   0   61.49    1.55
   0   3   1  378.57   10.50
   0   3   2   42.17    0.58
   0   3   3   37.88    0.66
   0   3   4   18.17    0.23
   0   3   5  147.92    5.75
   0   3   6   60.02    2.52
   0   3   7    6.12    0.33
   0   3   8    3.52    0.12
   0   3   9    2.41    0.34
   0   4 -17    1.23    0.09
   0   4 -16   13.39    0.69
   0   4 -15    6.75    0.34
   0   4 -14    3.71    0.12
   0   4 -13    3.55    0.20
   0   4 -12    0.69    0.26
   0   4 -11   13.01    0.50
   0   4 -10   18.28    0.76
   0   4  -9   28.11    0.88
   0   4  -8    7.27    0.24
   0   4  -7   11.18    1.20
   0   4  -6   10.42    0.91
   0   4  -5   69.12    2.24
   0   4  -4  173.37    6.28
   0   4  -3  407.46   14.30
   0   4  -2  243.80    8.14
   0   4  -1  808.24   30.73
   0   4   0   10.85    0.16
   0   4   1   42.72    0.83
   0   4   2   54.13    1.10
   0   4   3  342.45    6.66
   0   4   4    4.21    0.38
   0   4   5    7.44    0.36
   0   4   6   33.08    0.46
   0   4   7    2.95    0.11
   0   4   8    7.31    0.35
   0   4   9    3.03    0.18
   0   4  10    4.62    0.33
   0   5 -17    5.52    0.29
   0   5 -16    1.01    0.14
   0   5 -15    1.13    0.18
   0   5 -14    3.15    0.40
   0   5 -13    0.06    0.10
   0   5 -12    1.92    0.18
   0   5 -11    9.00    0.27
   0   5 -10   26.24    0.53
   0   5  -9   62.08    1.79
   0   5  -8   77.96    1.63
   0   5  -7    6.12    0.99
   0   5  -6   73.70    3.28
   0   5  -5   29.84    0.13
   0   5  -4   91.40    2.88
   0   5  -3  496.34   15.94
   0   5  -2    1.77    0.08
   0   5  -1  179.88    4.16
   0   5   0   11.42    0.12
   0   5   1   64.29    0.87
   0   5   2   66.33    1.35
   0   5   3  105.82    2.47
   0   5   4    6.49    0.19
   0   5   5    8.40    0.23
   0   5   6   39.01    0.66
   0   5   7   38.87    0.92
   0   5   8    5.51    0.28
   0   5   9    0.97    0.17
   0   5  10    4.68    0.30
   0   5  11    1.64    0.24
   0   6 -18    3.33    0.29
   0   6 -17    0.42    0.12
   0   6 -16    6.59    0.40
   0   6 -15    3.40    0.12
   0   6 -14    4.32    0.30
   0   6 -13    2.00    0.18
   0   6 -12    2.83    0.22
   0   6 -11    2.91    0.29
   0   6 -10   31.89    0.23
   0   6  -9  172.75    5.17
   0   6  -8   14.82    0.16
   0   6  -7  124.08    2.70
   0   6  -6    7.67    0.20
   0   6  -5  271.97   13.32
   0   6  -4   47.70    0.16
   0   6  -3    7.86    0.81
   0   6  -2    8.07    0.20
   0   6  -1   91.06    4.48
   0   6   0   18.50    1.08
   0   6   1   58.66    1.69
   0   6   2   22.67    0.17
   0   6   3   28.19    0.91
   0   6   4   56.24    2.90
   0   6   5    4.49    0.09
   0   6   6   21.70    0.58
   0   6   7   36.36    1.32
   0   6   8   35.49    1.12
   0   6   9    1.52    0.22
   0   6  10    4.70    0.31
   0   6  11    2.83    0.26
   0   7 -18    0.12    0.10
   0   7 -17    2.69    0.14
   0   7 -16    1.46    0.28
   0   7 -15    5.56    0.13
   0   7 -14   20.13    0.59
   0   7 -13   10.17    0.19
   0   7 -12   18.11    0.21
   0   7 -11    5.84    0.26
   0   7 -10    9.78    0.68
   0   7  -9   55.02    2.51
   0   7  -8   25.37    1.23
   0   7  -7    6.61    0.83
   0   7  -6  179.31    7.22
   0   7  -5   98.50    1.38
   0   7  -4  192.77    6.89
   0   7  -3   10.14    0.27
   0   7  -2   87.85    2.52
   0   7  -1   68.95    0.65
   0   7   0   32.73    0.23
   0   7   1  158.01    6.83
   0   7   2    6.47    0.08
   0   7   3    9.94    0.20
   0   7   4   29.88    0.32
   0   7   5    0.00    0.22
   0   7   6    5.27    0.18
   0   7   7   14.01    0.84
   0   7   8   14.89    0.54
   0   7   9    0.68    0.16
   0   7  10    2.36    0.19
   0   7  11   11.53    0.50
   0   8 -18    4.63    0.27
   0   8 -17    6.63    0.45
   0   8 -16    1.72    0.23
   0   8 -15    7.97    0.49
   0   8 -14    9.61    0.21
   0   8 -13   61.19    0.96
   0   8 -12   10.77    0.39
   0   8 -11    5.14    0.05
   0   8 -10   17.61    0.58
   0   8  -9   20.00    1.18
   0   8  -8    7.64    0.29
   0   8  -7   49.54    1.07
   0   8  -6    3.70    0.54
   0   8  -5  111.33    2.60
   0   8  -4    6.07    0.32
   0   8  -3   31.30    0.20
   0   8  -2  216.75    6.95
   0   8  -1   31.15    2.47
   0   8   0    7.94    0.15
   0   8   1   23.47    0.38
   0   8   2   29.49    1.81
   0   8   3    9.17    0.61
   0   8   4    3.28    0.31
   0   8   5    2.07    0.16
   0   8   6    4.81    0.38
   0   8   7    5.22    0.39
   0   8   8    0.85    0.23
   0   8   9    4.20    0.40
   0   8  10   12.32    0.55
   0   9 -18    1.93    0.16
   0   9 -17    0.67    0.13
   0   9 -16    1.00    0.08
   0   9 -15   10.01    0.38
   0   9 -14    4.33    0.11
   0   9 -13    8.72    0.19
   0   9 -12    2.10    0.13
   0   9 -11   14.49    0.25
   0   9 -10    0.06    0.12
   0   9  -9    1.19    0.25
   0   9  -8    6.92    0.11
   0   9  -7   17.43    0.95
   0   9  -6    3.09    0.11
   0   9  -5   14.44    1.09
   0   9  -4   53.03    1.59
   0   9  -3    3.63    0.10
   0   9  -2   18.63    0.65
   0   9  -1   15.62    0.45
   0   9   0   69.26    4.51
   0   9   1   12.08    0.52
   0   9   2    1.06    0.08
   0   9   3    8.03    0.26
   0   9   4    0.39    0.16
   0   9   5    1.89    0.18
   0   9   6    1.10    0.39
   0   9   7    1.87    0.21
   0   9   8    2.34    0.27
   0   9   9    0.05    0.14
   0  10 -18    5.50    0.32
   0  10 -17    0.76    0.10
   0  10 -16    1.48    0.13
   0  10 -15    0.02    0.09
   0  10 -14    6.66    0.23
   0  10 -13    0.18    0.07
   0  10 -12    3.64    0.05
   0  10 -11    3.17    0.09
   0  10 -10    4.09    0.12
   0  10  -9    1.85    0.05
   0  10  -8    3.17    0.14
   0  10  -7    5.35    0.33
   0  10  -6   86.85    2.14
   0  10  -5   16.27    0.73
   0  10  -4    8.01    0.11
   0  10  -3   42.84    0.79
   0  10  -2    7.48    0.22
   0  10  -1   17.92    0.29
   0  10   0   13.66    0.11
   0  10   1   12.91    0.57
   0  10   2    3.01    0.07
   0  10   3    7.09    0.29
   0  10   4    0.00    0.25
   0  10   5    6.52    0.26
   0  10   6    2.68    0.24
   0  10   7    2.16    0.33
   0  10   8    0.63    0.15
   0  11 -18    1.78    0.07
   0  11 -17    0.73    0.06
   0  11 -16    0.77    0.10
   0  11 -15    0.96    0.07
   0  11 -14    0.98    0.08
   0  11 -13   15.55    0.36
   0  11 -12   16.85    0.46
   0  11 -11    0.80    0.08
   0  11 -10    3.43    0.11
   0  11  -9    8.29    0.18
   0  11  -8    9.88    0.26
   0  11  -7    0.20    0.12
   0  11  -6   53.13    0.53
   0  11  -5    6.88    0.05
   0  11  -4    9.98    0.37
   0  11  -3    8.29    0.25
   0  11  -2    7.10    0.10
   0  11  -1    7.89    0.22
   0  11   0   11.97    0.23
   0  11   1    4.61    0.08
   0  11   2    0.58    0.18
   0  11   3    1.60    0.10
   0  11   4    5.54    0.55
   0  11   5    4.14    0.37
   0  11   6    1.42    0.16
   0  12 -18   10.12    0.43
   0  12 -17    6.95    0.18
   0  12 -16    0.17    0.06
   0  12 -15    4.90    0.09
   0  12 -14    7.95    0.26
   0  12 -13   13.67    0.24
   0  12 -12    1.32    0.09
   0  12 -11    7.22    0.21
   0  12 -10    7.29    0.15
   0  12  -9    7.30    0.08
   0  12  -8    6.85    0.37
   0  12  -7   12.04    0.11
   0  12  -6    3.23    0.05
   0  12  -5   29.31    0.48
   0  12  -4    5.57    0.05
   0  12  -3   10.34    0.21
   0  12  -2    7.55    0.29
   0  12  -1    2.94    0.10
   0  12   0    0.55    0.16
   0  12   1   13.98    0.44
   0  12   2    0.40    0.09
   0  12   3    1.63    0.17
   0  12   4    1.62    0.26
   0  12   6    5.84    0.40
   0  13 -17    0.84    0.13
   0  13 -16    4.16    0.14
   0  13 -15   11.61    0.35
   0  13 -14    3.54    0.07
   0  13 -13   10.56    0.28
   0  13 -12   21.44    0.43
   0  13 -11    0.17    0.19
   0  13 -10    0.15    0.09
   0  13  -9    5.46    0.13
   0  13  -8   15.05    0.27
   0  13  -7    4.54    0.12
   0  13  -6    9.73    0.14
   0  13  -5   30.63    0.40
   0  13  -4   11.76    0.47
   0  13  -3    2.78    0.06
   0  13  -2    5.29    0.24
   0  13  -1    7.12    0.25
   0  13   0    0.13    0.13
   0  13   1    2.23    0.11
   0  13   2    0.31    0.11
   0  13   3    2.58    0.13
   0  13   4    2.80    0.20
   0  13   5    1.72    0.19
   0  14 -17    3.81    0.17
   0  14 -16    2.70    0.06
   0  14 -15    0.22    0.09
   0  14 -14    0.95    0.06
   0  14 -13    4.33    0.12
   0  14 -12   18.93    0.28
   0  14 -11    1.06    0.11
   0  14 -10    6.03    0.07
   0  14  -9    3.81    0.35
   0  14  -8   12.64    0.11
   0  14  -7    2.71    0.15
   0  14  -6    2.16    0.09
   0  14  -5    9.12    0.39
   0  14  -4    8.06    0.25
   0  14  -3   15.16    0.41
   0  14  -2    3.19    0.12
   0  14  -1    4.82    0.16
   0  14   0    4.63    0.14
   0  14   1    2.57    0.12
   0  14   2    0.95    0.09
   0  14   3    3.31    0.27
   0  15 -17    0.50    0.12
   0  15 -16    4.39    0.16
   0  15 -15    0.20    0.05
   0  15 -14    0.31    0.05
   0  15 -13    0.10    0.05
   0  15 -12    0.07    0.06
   0  15 -11    0.50    0.05
   0  15 -10    5.02    0.05
   0  15  -9    7.08    0.21
   0  15  -8   10.11    0.23
   0  15  -7    6.22    0.14
   0  15  -6    3.16    0.13
   0  15  -5    4.20    0.24
   0  15  -4    1.48    0.09
   0  15  -3    5.15    0.47
   0  15  -2    0.58    0.07
   0  15  -1    0.31    0.08
   0  15   0    2.44    0.14
   0  15   1    1.26    0.09
   0  16 -16    1.81    0.10
   0  16 -15    4.93    0.10
   0  16 -14    4.10    0.10
   0  16 -13    0.02    0.05
   0  16 -12    1.16    0.08
   0  16 -11    1.11    0.11
   0  16 -10   13.93    0.41
   0  16  -9    2.20    0.11
   0  16  -8    3.99    0.12
   0  16  -7    4.45    0.13
   0  16  -6    0.30    0.08
   0  16  -5    0.80    0.06
   0  16  -4    4.02    0.16
   0  16  -3    0.96    0.10
   0  16  -2    0.32    0.10
   0  16  -1    1.58    0.14
   0  16   0    1.74    0.17
   0  17 -15    1.03    0.10
   0  17 -14    0.36    0.11
   0  17 -13    1.26    0.06
   0  17 -12    1.02    0.05
   0  17 -11    0.78    0.08
   0  17 -10    0.56    0.04
   0  17  -9    1.14    0.12
   0  17  -8    3.22    0.13
   0  17  -7    0.78    0.07
   0  17  -6    0.73    0.08
   0  17  -5    0.95    0.06
   0  17  -4    3.09    0.17
   0  17  -3    1.10    0.08
   0  17  -2    0.86    0.08
   0  18 -13    7.75    0.35
   0  18 -12    4.66    0.10
   0  18 -11    0.08    0.06
   0  18 -10    0.07    0.05
   0  18  -9    1.16    0.05
   0  18  -8    8.39    0.43
   0  18  -7    0.93    0.14
   0  18  -6    0.50    0.06
   0  18  -5    1.02    0.15
   1  -8 -10    0.46    0.14
   1  -8  -8    6.63    0.49
   1  -8  -7    0.48    0.21
   1  -8  -6    2.85    0.24
   1  -7 -11    0.22    0.14
   1  -7 -10    8.18    0.48
   1  -7  -9    0.68    0.21
   1  -7  -8    2.74    0.20
   1  -7  -7    5.41    0.31
   1  -7  -6    1.79    0.22
   1  -7  -5    6.79    0.40
   1  -6 -12    1.42    0.17
   1  -6 -11    6.34    0.45
   1  -6 -10    3.40    0.30
   1  -6  -9    0.73    0.17
   1  -6  -8    1.71    0.21
   1  -6  -7   46.82    2.34
   1  -6  -6   87.32    3.23
   1  -6  -4    9.21    0.61
   1  -6  -3    0.23    0.17
   1  -6  -2   52.87    2.93
   1  -6  -1   19.44    0.10
   1  -6   2   58.26    2.60
   1  -6   3    3.33    0.21
   1  -5 -13    0.84    0.15
   1  -5 -12    9.23    0.32
   1  -5 -11    0.75    0.13
   1  -5 -10    1.31    0.16
   1  -5  -9    0.85    0.15
   1  -5  -8   60.16    1.67
   1  -5  -7   14.78    0.86
   1  -5  -6    7.14    0.15
   1  -5  -5   28.17    0.79
   1  -5  -4   13.67    0.58
   1  -5  -3   43.61    1.14
   1  -5  -2   71.82    0.81
   1  -5   2  342.84   13.10
   1  -5   5   76.85    4.51
   1  -4 -13    4.20    0.25
   1  -4 -12    3.80    0.26
   1  -4 -11    9.67    0.36
   1  -4 -10    0.82    0.13
   1  -4  -9    2.60    0.19
   1  -4  -8   29.51    0.46
   1  -4  -7    1.32    0.18
   1  -4  -6    8.55    0.19
   1  -4  -5  159.75    6.35
   1  -4  -4   47.14    2.41
   1  -4  -3    9.85    0.83
   1  -4  -2   44.85    1.10
   1  -4   1  277.97    5.02
   1  -3 -14    2.49    0.15
   1  -3 -13    2.39    0.22
   1  -3 -12    2.92    0.27
   1  -3 -11   10.94    0.57
   1  -3 -10    2.15    0.17
   1  -3  -9    2.71    0.16
   1  -3  -8    2.81    0.09
   1  -3  -7   46.56    0.51
   1  -3  -6   67.35    2.53
   1  -3  -5    0.17    0.40
   1  -3  -4   60.05    0.84
   1  -3  -3    8.89    0.46
   1  -3  -2   37.29    1.86
   1  -3   5  177.76    5.37
   1  -3   6    1.00    0.11
   1  -2 -15    1.56    0.12
   1  -2 -14    0.67    0.12
   1  -2 -13    5.73    0.57
   1  -2 -12    1.58    0.33
   1  -2 -11    2.22    0.12
   1  -2 -10   31.12    0.69
   1  -2  -9    4.59    0.15
   1  -2  -8    1.84    0.11
   1  -2  -7  107.76    2.61
   1  -2  -6   11.38    0.16
   1  -2  -5    7.91    0.19
   1  -2  -4   58.27    0.51
   1  -2  -3  515.67   26.21
   1  -2  -2  177.28   13.14
   1  -2   4   65.67    0.95
   1  -2   5   11.84    0.64
   1  -2   6    1.28    0.26
   1  -2   7   16.27    1.08
   1  -1 -15    0.16    0.11
   1  -1 -14    0.76    0.14
   1  -1 -13    6.66    0.37
   1  -1 -12    5.69    0.25
   1  -1 -11    1.08    0.19
   1  -1 -10   11.54    0.32
   1  -1  -9   36.45    0.82
   1  -1  -8   30.70    1.47
   1  -1  -7   39.80    0.93
   1  -1  -6   70.91    1.48
   1  -1  -5   38.34    0.43
   1  -1  -4   76.39    3.59
   1  -1  -3   48.15    0.18
   1  -1  -2  162.32    0.91
   1  -1  -1   22.25    0.04
   1  -1   3   12.81    0.15
   1  -1   4   30.50    2.78
   1  -1   5   68.20    1.18
   1  -1   6   24.79    0.69
   1  -1   7   21.81    0.93
   1   0 -16    2.02    0.17
   1   0 -15   14.28    0.64
   1   0 -14    1.37    0.13
   1   0 -13    8.33    0.32
   1   0 -12    4.06    0.23
   1   0 -11   58.57    1.06
   1   0 -10    7.38    0.29
   1   0  -9   19.14    0.27
   1   0  -8   19.61    1.09
   1   0  -7   27.78    1.03
   1   0  -6   34.48    0.87
   1   0  -5    9.93    0.31
   1   0  -4   14.89    0.92
   1   0  -3    3.08    0.30
   1   0  -2  102.04    0.77
   1   0  -1   68.30    0.57
   1   0   0   47.07    0.16
   1   0   1   47.60    0.48
   1   0   2   20.54    1.17
   1   0   3   17.64    0.77
   1   0   4   33.13    1.88
   1   0   5   19.19    0.42
   1   0   6   21.64    0.21
   1   0   7    2.42    0.44
   1   0   8    3.21    0.27
   1   1 -16    5.65    0.24
   1   1 -15    3.76    0.20
   1   1 -14    3.40    0.33
   1   1 -13    7.21    0.71
   1   1 -12    3.21    0.19
   1   1 -11   35.13    0.94
   1   1 -10   32.81    0.88
   1   1  -9   14.82    0.23
   1   1  -8   98.50    1.12
   1   1  -7  117.60    3.41
   1   1  -6  126.72    2.24
   1   1  -5  125.88    2.85
   1   1  -4  108.95    2.23
   1   1  -3    0.16    0.06
   1   1   0   44.53    0.27
   1   1   1   36.89    0.49
   1   1   2  182.74    8.38
   1   1   3   84.27    2.33
   1   1   4   32.22    0.27
   1   1   5   84.84    2.91
   1   1   6  122.86    4.07
   1   1   7    9.19    0.59
   1   1   8    3.75    0.14
   1   2 -17    2.98    0.25
   1   2 -16    6.33    0.22
   1   2 -15    0.30    0.12
   1   2 -14    0.10    0.15
   1   2 -13    1.04    0.18
   1   2 -12   14.43    0.34
   1   2 -11    8.47    0.15
   1   2 -10    6.36    0.12
   1   2  -9    6.82    0.22
   1   2  -8   42.38    2.81
   1   2  -7   59.92    1.09
   1   2  -6    2.02    0.22
   1   2  -5   31.51    0.35
   1   2  -4  645.93   21.32
   1   2  -3   20.04    0.62
   1   2   0   11.53    0.15
   1   2   1   31.71    0.33
   1   2   2   10.51    1.76
   1   2   3  378.84    6.63
   1   2   4   31.05    0.39
   1   2   5  114.38    3.28
   1   2   6   98.92    3.31
   1   2   7    6.91    0.49
   1   2   8    0.29    0.23
   1   2   9    3.38    0.28
   1   3 -17    4.34    0.31
   1   3 -16    8.60    0.36
   1   3 -15    2.85    0.14
   1   3 -14    1.88    0.22
   1   3 -13   14.43    0.18
   1   3 -12    9.46    0.22
   1   3 -11    4.94    0.16
   1   3 -10   73.38    2.21
   1   3  -9    2.18    0.27
   1   3  -8   43.27    0.51
   1   3  -7  134.09    5.51
   1   3  -6    1.37    0.16
   1   3  -5  466.81   16.86
   1   3  -4  335.32    9.33
   1   3  -3    3.11    0.12
   1   3  -2  123.05    1.51
   1   3  -1  107.52    3.50
   1   3   0   53.80    0.83
   1   3   1   25.57    0.47
   1   3   2  121.47    1.02
   1   3   3    3.73    0.11
   1   3   4    4.20    0.24
   1   3   5   11.92    0.11
   1   3   6    7.94    0.29
   1   3   7    8.86    0.41
   1   3   8   13.81    0.54
   1   3   9    0.61    0.11
   1   3  10    0.88    0.17
   1   4 -17    2.62    0.24
   1   4 -16    4.41    0.17
   1   4 -15    6.12    0.26
   1   4 -14    0.24    0.14
   1   4 -13    0.76    0.22
   1   4 -12   30.32    0.36
   1   4 -11    4.11    0.18
   1   4 -10   89.09    2.73
   1   4  -9   17.20    0.82
   1   4  -8   80.31    4.38
   1   4  -7    3.55    0.21
   1   4  -6   40.04    0.20
   1   4  -5    0.70    0.08
   1   4  -4   11.28    0.82
   1   4  -3    1.96    0.15
   1   4  -2  198.16   10.72
   1   4  -1   32.90    0.27
   1   4   0   24.96    0.40
   1   4   1    1.93    0.10
   1   4   2   80.91    2.41
   1   4   3   84.89    2.62
   1   4   4   17.88    1.45
   1   4   5  170.02    3.33
   1   4   6    8.19    0.23
   1   4   7    8.10    0.23
   1   4   8   48.69    0.98
   1   4   9    6.33    0.24
   1   4  10    7.75    0.48
   1   4  11    2.24    0.28
   1   5 -18    3.10    0.17
   1   5 -17    0.72    0.11
   1   5 -16    0.46    0.12
   1   5 -15    0.17    0.14
   1   5 -14   14.23    1.16
   1   5 -13    2.42    0.20
   1   5 -12   18.17    0.67
   1   5 -11   22.73    0.29
   1   5 -10   23.38    0.76
   1   5  -9    8.21    0.14
   1   5  -8  111.81    2.87
   1   5  -7   92.04    5.11
   1   5  -6   13.94    0.20
   1   5  -5   71.87    2.26
   1   5  -4  126.51    5.60
   1   5  -3  269.48   12.44
   1   5  -2  299.60   12.14
   1   5  -1    1.63    0.50
   1   5   0   50.87    0.75
   1   5   1   20.99    0.15
   1   5   2  139.71    1.36
   1   5   3   21.38    0.93
   1   5   4   60.01    1.31
   1   5   5    3.10    0.43
   1   5   6   16.99    0.40
   1   5   7    5.33    0.29
   1   5   8   26.80    0.97
   1   5   9    3.23    0.30
   1   5  10    1.70    0.25
   1   5  11    8.45    0.36
   1   6 -18    0.57    0.11
   1   6 -17    1.37    0.11
   1   6 -16    0.53    0.11
   1   6 -15    2.79    0.20
   1   6 -14    3.47    0.10
   1   6 -13    0.10    0.10
   1   6 -12    1.34    0.18
   1   6 -11   49.47    0.97
   1   6 -10  179.22    4.03
   1   6  -9    4.83    0.21
   1   6  -8   81.23    2.18
   1   6  -7   18.97    0.26
   1   6  -6    1.88    0.32
   1   6  -5    6.99    0.16
   1   6  -4    6.17    0.62
   1   6  -3   42.20    0.17
   1   6  -2   10.77    0.36
   1   6  -1    4.47    0.21
   1   6   0   20.12    0.74
   1   6   1    2.18    0.14
   1   6   2   38.77    1.51
   1   6   3    1.27    0.21
   1   6   4   21.27    0.59
   1   6   5    5.66    0.15
   1   6   6   18.11    0.73
   1   6   7   10.65    0.39
   1   6   8    0.26    0.22
   1   6   9    2.01    0.30
   1   6  10    0.53    0.23
   1   6  11    0.58    0.17
   1   7 -18    1.01    0.20
   1   7 -17    4.79    0.38
   1   7 -16    0.50    0.10
   1   7 -15    7.06    0.46
   1   7 -14   13.00    0.29
   1   7 -13   17.66    0.29
   1   7 -12    9.67    0.77
   1   7 -11   64.00    0.87
   1   7 -10    7.74    0.15
   1   7  -9    1.19    0.37
   1   7  -8    8.73    0.14
   1   7  -7    4.37    0.27
   1   7  -6    5.25    0.36
   1   7  -5   37.10    1.27
   1   7  -4   93.50    2.37
   1   7  -3   64.72    0.17
   1   7  -2  102.03    3.61
   1   7  -1   80.66    3.44
   1   7   0   30.33    1.42
   1   7   1   20.47    0.48
   1   7   2   11.77    0.72
   1   7   3    3.70    0.28
   1   7   4    0.97    0.07
   1   7   5    5.06    0.31
   1   7   6    1.12    0.25
   1   7   7    6.23    0.54
   1   7   8    9.97    0.42
   1   7   9    3.00    0.28
   1   7  10    6.41    0.33
   1   7  11    3.42    0.28
   1   8 -18    1.92    0.11
   1   8 -17    5.23    0.28
   1   8 -16    3.57    0.28
   1   8 -15    3.21    0.13
   1   8 -14   15.98    0.29
   1   8 -13   94.60    2.13
   1   8 -12   15.91    0.35
   1   8 -11    0.15    0.14
   1   8 -10   51.10    0.61
   1   8  -9  106.94    5.02
   1   8  -7    8.90    0.81
   1   8  -6   13.17    0.31
   1   8  -5   12.40    0.63
   1   8  -4   62.14    1.37
   1   8  -3  110.77    4.89
   1   8  -2   19.24    0.24
   1   8  -1    0.81    0.27
   1   8   0    6.88    0.55
   1   8   1   94.75    4.51
   1   8   2   10.35    0.10
   1   8   3    5.80    0.29
   1   8   4   19.29    0.72
   1   8   5    6.69    0.19
   1   8   6    2.33    0.44
   1   8   7   10.28    0.31
   1   8   8    3.74    0.27
   1   8   9    4.00    0.29
   1   8  10    0.87    0.20
   1   9 -18    1.60    0.13
   1   9 -17    0.62    0.08
   1   9 -16    4.74    0.17
   1   9 -15    5.62    0.20
   1   9 -14   46.73    1.45
   1   9 -13   23.29    0.40
   1   9 -12   11.69    0.36
   1   9 -11   19.00    0.20
   1   9 -10   12.63    0.30
   1   9  -9   10.64    0.30
   1   9  -8   23.20    0.74
   1   9  -7    2.21    0.17
   1   9  -6   33.34    1.17
   1   9  -5    1.11    0.62
   1   9  -4  124.08    3.84
   1   9  -3   44.81    1.73
   1   9  -2   28.38    1.26
   1   9  -1   40.43    0.51
   1   9   0   26.57    0.34
   1   9   1    0.85    0.14
   1   9   2   50.64    1.54
   1   9   3   10.78    0.38
   1   9   4    1.33    0.12
   1   9   5    7.06    0.37
   1   9   6    1.30    0.16
   1   9   7    8.41    0.70
   1   9   8    0.39    0.15
   1   9   9    4.19    0.26
   1  10 -18    0.89    0.12
   1  10 -17    3.92    0.10
   1  10 -16    1.08    0.09
   1  10 -15    7.73    0.15
   1  10 -14    4.85    0.12
   1  10 -13    1.36    0.22
   1  10 -12    0.30    0.08
   1  10 -11   10.53    0.05
   1  10 -10    2.32    0.21
   1  10  -9   22.27    0.19
   1  10  -8   13.20    0.13
   1  10  -7   75.56    0.91
   1  10  -6   21.50    0.32
   1  10  -5   70.00    1.00
   1  10  -4    9.82    0.06
   1  10  -3    2.04    0.05
   1  10  -2    3.65    0.12
   1  10  -1    5.38    0.19
   1  10   0    4.56    0.15
   1  10   1   20.66    0.44
   1  10   2    0.36    0.17
   1  10   3    8.26    0.28
   1  10   4    3.71    0.27
   1  10   5    9.37    0.55
   1  10   6    3.13    0.20
   1  10   7    1.96    0.20
   1  10   8    1.03    0.17
   1  11 -18    5.29    0.17
   1  11 -17    6.46    0.19
   1  11 -16    4.26    0.16
   1  11 -15    3.61    0.10
   1  11 -14   15.83    0.20
   1  11 -13    0.60    0.05
   1  11 -12    7.82    0.18
   1  11 -11    5.06    0.10
   1  11 -10    3.92    0.10
   1  11  -9    6.37    0.13
   1  11  -8   14.90    0.28
   1  11  -7   10.47    0.22
   1  11  -6    5.85    0.12
   1  11  -5   36.21    0.38
   1  11  -4    6.59    0.05
   1  11  -3   39.64    0.50
   1  11  -2    1.06    0.10
   1  11  -1    2.32    0.10
   1  11   0    2.79    0.08
   1  11   1    9.59    0.12
   1  11   2    0.64    0.08
   1  11   3   21.37    0.42
   1  11   4    0.35    0.17
   1  11   5    1.45    0.20
   1  11   6   10.04    0.53
   1  11   7    1.83    0.16
   1  12 -18    2.13    0.16
   1  12 -17    0.73    0.07
   1  12 -16    2.66    0.06
   1  12 -15    8.41    0.35
   1  12 -14    3.43    0.18
   1  12 -13    0.70    0.07
   1  12 -12   16.36    0.26
   1  12 -11    8.36    0.28
   1  12 -10   17.59    0.27
   1  12  -9    4.68    0.11
   1  12  -8    2.24    0.06
   1  12  -7    1.04    0.08
   1  12  -6    0.37    0.05
   1  12  -5   57.95    0.82
   1  12  -4   23.07    0.34
   1  12  -3    3.11    0.18
   1  12  -2    4.18    0.16
   1  12  -1    2.15    0.09
   1  12   0   21.46    0.76
   1  12   1    3.78    0.17
   1  12   2    1.04    0.09
   1  12   3    7.05    0.28
   1  12   4    7.44    0.37
   1  12   5    1.82    0.18
   1  13 -18    0.31    0.07
   1  13 -17    1.96    0.07
   1  13 -16    5.81    0.21
   1  13 -15    3.55    0.08
   1  13 -14    1.24    0.08
   1  13 -13    1.69    0.04
   1  13 -12    1.04    0.10
   1  13 -11    8.78    0.23
   1  13 -10   16.72    0.20
   1  13  -9    0.39    0.07
   1  13  -8    2.09    0.15
   1  13  -7    5.74    0.08
   1  13  -6    1.62    0.10
   1  13  -5    0.07    0.06
   1  13  -4    0.19    0.08
   1  13  -3    0.43    0.12
   1  13  -2    5.48    0.20
   1  13  -1    0.40    0.11
   1  13   0    2.98    0.13
   1  13   1   16.22    0.88
   1  13   2    1.84    0.23
   1  13   3    3.11    0.18
   1  13   4    0.16    0.08
   1  14 -17    8.07    0.20
   1  14 -16    0.18    0.06
   1  14 -15    0.86    0.05
   1  14 -14   10.59    0.39
   1  14 -13    7.61    0.19
   1  14 -12    6.59    0.19
   1  14 -11    3.11    0.07
   1  14 -10    5.17    0.17
   1  14  -9    2.71    0.06
   1  14  -8    8.91    0.27
   1  14  -7    8.93    0.17
   1  14  -6   38.28    0.43
   1  14  -5    0.12    0.07
   1  14  -4    6.83    0.37
   1  14  -3    6.68    0.18
   1  14  -2    0.87    0.07
   1  14  -1    3.26    0.21
   1  14   0    2.52    0.15
   1  14   1    2.42    0.16
   1  14   2    3.35    0.12
   1  14   3    0.65    0.11
   1  15 -17    1.56    0.14
   1  15 -16    0.36    0.06
   1  15 -15    2.56    0.12
   1  15 -14    2.50    0.07
   1  15 -13    2.57    0.21
   1  15 -12    3.64    0.07
   1  15 -11    0.50    0.05
   1  15 -10    7.76    0.28
   1  15  -9   14.55    0.38
   1  15  -8    8.10    0.10
   1  15  -7    2.64    0.15
   1  15  -6    2.73    0.10
   1  15  -5    2.08    0.06
   1  15  -4    2.55    0.34
   1  15  -3    2.02    0.13
   1  15  -2    6.70    0.23
   1  15  -1    0.04    0.09
   1  15   0    0.81    0.13
   1  15   1    3.69    0.17
   1  16 -16    4.94    0.18
   1  16 -15    6.77    0.29
   1  16 -14    5.13    0.11
   1  16 -13    1.63    0.08
   1  16 -12    4.29    0.10
   1  16 -11    2.34    0.10
   1  16 -10    5.22    0.11
   1  16  -9    0.99    0.12
   1  16  -8    4.03    0.06
   1  16  -7    3.23    0.09
   1  16  -6    9.85    0.23
   1  16  -5    3.30    0.08
   1  16  -4    1.81    0.14
   1  16  -3    2.05    0.15
   1  16  -2    2.06    0.15
   1  16  -1    0.42    0.07
   1  17 -15    8.95    0.18
   1  17 -14    5.04    0.22
   1  17 -13    8.90    0.18
   1  17 -12    2.37    0.12
   1  17 -11    1.90    0.14
   1  17 -10    3.46    0.06
   1  17  -9    3.19    0.24
   1  17  -8    2.67    0.15
   1  17  -7    2.78    0.20
   1  17  -6    2.01    0.09
   1  17  -5    0.71    0.09
   1  17  -4    1.04    0.05
   1  17  -3    3.75    0.18
   1  18 -13    1.77    0.10
   1  18 -12    1.04    0.10
   1  18 -11    3.11    0.14
   1  18 -10    2.48    0.08
   1  18  -9    2.55    0.07
   1  18  -8   11.91    0.58
   1  18  -7    2.93    0.10
   1  18  -6    1.87    0.10
   1  18  -5    1.99    0.21
   2  -9  -8    4.67    0.38
   2  -8 -10   10.70    0.48
   2  -8  -9    1.53    0.24
   2  -8  -8   13.29    0.57
   2  -8  -7    6.40    0.55
   2  -8  -6    0.71    0.37
   2  -8  -5    1.09    0.26
   2  -7 -11    2.46    0.27
   2  -7 -10    2.36    0.32
   2  -7  -9    0.58    0.17
   2  -7  -8    7.50    0.58
   2  -7  -7    2.74    0.18
   2  -7  -6   11.27    0.79
   2  -7  -5    6.01    0.54
   2  -7   3   52.56    3.73
   2  -6 -12    3.48    0.25
   2  -6 -11    4.35    0.25
   2  -6 -10    2.56    0.13
   2  -6  -9    4.25    0.28
   2  -6  -8   23.34    1.78
   2  -6  -7    7.64    0.49
   2  -6  -6   11.17    0.71
   2  -6  -5    9.64    0.44
   2  -6  -4    2.33    0.33
   2  -6  -3    3.20    0.48
   2  -6  -2    9.40    0.17
   2  -6   2   23.92    0.52
   2  -6   3   10.98    0.24
   2  -6   4   60.65    4.16
   2  -6   5    0.62    0.34
   2  -5 -13    6.55    0.23
   2  -5 -12    6.12    0.56
   2  -5 -11    0.60    0.13
   2  -5 -10    1.79    0.29
   2  -5  -9    0.78    0.13
   2  -5  -8    8.20    0.34
   2  -5  -7    6.44    0.17
   2  -5  -6    8.82    1.14
   2  -5  -5   21.92    1.31
   2  -5  -4    0.67    0.21
   2  -5  -3   36.50    1.76
   2  -5   1   48.88    0.76
   2  -5   2   13.08    0.71
   2  -5   3    7.52    0.40
   2  -5   4   66.17    1.41
   2  -5   5   67.84    4.55
   2  -5   6   15.22    1.35
   2  -5   7  152.00    8.54
   2  -4 -13    1.83    0.19
   2  -4 -12    2.90    0.22
   2  -4 -11    9.46    0.41
   2  -4 -10    9.46    0.45
   2  -4  -9    6.17    0.74
   2  -4  -8    0.04    0.09
   2  -4  -7    4.63    0.13
   2  -4  -6   15.98    1.54
   2  -4  -5    0.83    0.84
   2  -4  -4   17.71    0.84
   2  -4  -3   22.14    0.63
   2  -4  -2   19.62    1.18
   2  -4  -1  121.16    3.28
   2  -4   1   20.92    4.23
   2  -4   2   12.23    0.51
   2  -4   3   72.30    5.10
   2  -4   4   26.25    2.59
   2  -4   5  146.93    3.05
   2  -4   6   13.64    0.19
   2  -3 -14    0.19    0.12
   2  -3 -13    5.43    0.51
   2  -3 -12    0.88    0.15
   2  -3 -11    5.57    0.45
   2  -3 -10    0.87    0.11
   2  -3  -9   10.13    0.26
   2  -3  -8    0.09    0.13
   2  -3  -7    6.51    0.58
   2  -3  -6   55.44    1.24
   2  -3  -5    4.13    0.54
   2  -3  -4    7.95    0.08
   2  -3  -3   31.86    1.08
   2  -3  -2  223.58    8.21
   2  -3  -1  207.65    9.40
   2  -3   0   28.07    0.13
   2  -3   1    9.97    1.55
   2  -3   2    3.85    0.25
   2  -3   3  128.15    1.28
   2  -3   4    6.22    1.24
   2  -3   5   27.36    0.39
   2  -3   6   11.38    0.19
   2  -3  12    6.21    0.36
   2  -2 -15    1.35    0.14
   2  -2 -14    0.97    0.17
   2  -2 -13    1.93    0.17
   2  -2 -12    3.35    0.25
   2  -2 -11    0.24    0.10
   2  -2 -10    0.19    0.20
   2  -2  -9    1.87    0.10
   2  -2  -8   81.03    1.25
   2  -2  -7    5.57    1.37
   2  -2  -6   17.84    0.64
   2  -2  -5    4.32    0.26
   2  -2  -4   36.15    0.19
   2  -2  -3  116.22    2.41
   2  -2  -2  255.33    6.79
   2  -2  -1   42.11    3.17
   2  -2   0  134.50    7.30
   2  -2   1   50.21    5.57
   2  -2   2   26.72    0.32
   2  -2   3    9.44    0.19
   2  -2   4   47.04    2.43
   2  -2   5    1.80    0.80
   2  -2   6   23.03    0.76
   2  -2   7    8.68    0.92
   2  -2  12    6.34    0.45
   2  -1 -15    2.31    0.19
   2  -1 -14    0.69    0.14
   2  -1 -13    1.12    0.16
   2  -1 -12    0.68    0.12
   2  -1 -11    4.02    0.18
   2  -1 -10    6.60    0.14
   2  -1  -9   37.75    0.66
   2  -1  -8   40.19    1.11
   2  -1  -7   19.45    0.60
   2  -1  -6    3.67    0.09
   2  -1  -5    0.73    0.36
   2  -1  -4  215.85    8.67
   2  -1  -3   15.42    0.25
   2  -1  -2  130.54    3.61
   2  -1  -1  106.28    1.41
   2  -1   0   51.61    4.34
   2  -1   1   39.50    0.24
   2  -1   2   30.54    0.18
   2  -1   3   82.19    3.07
   2  -1   4   79.10    3.43
   2  -1   5   42.70    2.89
   2  -1   6   44.28    2.26
   2  -1   7   23.93    1.47
   2  -1   8    3.58    0.27
   2   0 -16    3.19    0.32
   2   0 -15    6.90    0.28
   2   0 -14    2.18    0.21
   2   0 -13    3.62    0.28
   2   0 -12   12.15    0.44
   2   0 -11    5.58    0.44
   2   0 -10    6.80    0.25
   2   0  -9    3.23    0.15
   2   0  -8    3.83    0.17
   2   0  -7    2.35    0.12
   2   0  -6  125.45    2.12
   2   0  -5   35.65    0.98
   2   0  -4   23.20    0.65
   2   0  -3   52.46    3.03
   2   0  -2   11.93    0.32
   2   0  -1  223.16    3.22
   2   0   0  307.19    2.78
   2   0   1   53.84    0.82
   2   0   2   12.26    0.39
   2   0   3  147.82    3.61
   2   0   4  226.99    7.32
   2   0   5   34.18    0.97
   2   0   6    7.80    0.22
   2   0   7   12.30    0.75
   2   0   8   21.17    0.72
   2   1 -16    0.67    0.12
   2   1 -15    5.37    0.26
   2   1 -14    0.69    0.19
   2   1 -13    1.35    0.19
   2   1 -12   10.34    0.26
   2   1 -11    0.81    0.09
   2   1 -10    7.77    0.10
   2   1  -9   14.71    0.68
   2   1  -8    3.17    0.08
   2   1  -7   13.61    0.35
   2   1  -6   49.35    2.69
   2   1  -5    2.08    0.75
   2   1  -4   21.72    0.33
   2   1   0   42.73    0.20
   2   1   1    1.58    0.12
   2   1   2   63.99    2.16
   2   1   3   80.17    1.68
   2   1   4   16.78    0.84
   2   1   5    5.83    0.21
   2   1   6    0.19    0.25
   2   1   7    0.30    0.19
   2   1   8    2.29    0.15
   2   1   9    2.46    0.14
   2   2 -17    0.11    0.12
   2   2 -16    4.41    0.53
   2   2 -15    0.31    0.10
   2   2 -14    1.56    0.14
   2   2 -13    2.91    0.16
   2   2 -12   18.69    0.30
   2   2 -11    9.32    0.34
   2   2 -10    1.65    0.75
   2   2  -9   12.93    0.37
   2   2  -8   50.78    2.51
   2   2  -7   31.06    0.82
   2   2  -6    3.68    0.16
   2   2  -5  488.83   22.05
   2   2  -4   15.07    0.58
   2   2  -3   23.94    1.18
   2   2  -1   46.44    0.60
   2   2   0    6.55    0.07
   2   2   1   90.72    1.79
   2   2   2    7.52    0.74
   2   2   3   10.65    0.31
   2   2   4    5.19    0.68
   2   2   5   49.70    0.69
   2   2   6   26.08    0.39
   2   2   7   19.17    0.48
   2   2   8    0.66    0.14
   2   2   9    5.41    0.27
   2   3 -17    1.01    0.17
   2   3 -16    2.42    0.27
   2   3 -15    1.01    0.13
   2   3 -14    1.10    0.19
   2   3 -13    0.67    0.10
   2   3 -12   15.39    0.28
   2   3 -11   50.34    1.22
   2   3 -10   19.86    1.63
   2   3  -9    0.70    0.39
   2   3  -8   44.53    0.88
   2   3  -7   46.33    2.45
   2   3  -6   73.79    5.47
   2   3  -5  180.48    5.07
   2   3  -4   63.56    4.91
   2   3  -2   42.18    2.73
   2   3  -1    9.26    1.06
   2   3   0   41.77    0.24
   2   3   1   69.32    0.99
   2   3   2   20.25    0.71
   2   3   3   22.09    0.91
   2   3   4    2.62    0.19
   2   3   5   43.09    1.66
   2   3   6   26.23    0.72
   2   3   7    2.01    0.22
   2   3   8    7.68    0.31
   2   3   9    0.30    0.23
   2   3  10    3.50    0.36
   2   3  11    1.16    0.24
   2   4 -17    2.57    0.13
   2   4 -16    2.42    0.27
   2   4 -15    2.41    0.43
   2   4 -14    0.07    0.17
   2   4 -13   40.38    0.73
   2   4 -12   45.36    1.32
   2   4 -11   17.26    0.58
   2   4 -10   27.19    1.40
   2   4  -9   25.60    0.33
   2   4  -8    9.65    0.16
   2   4  -7   11.84    0.09
   2   4  -6   37.91    4.66
   2   4  -5   69.26    0.29
   2   4  -2  238.70    4.97
   2   4  -1  295.67   13.68
   2   4   0   66.13    7.91
   2   4   1    5.13    0.13
   2   4   2   20.22    0.27
   2   4   3    1.81    0.52
   2   4   4    1.86    0.35
   2   4   5   21.73    0.82
   2   4   6   28.93    0.96
   2   4   7   14.53    0.36
   2   4   8    1.17    0.15
   2   4   9    1.36    0.33
   2   4  10    3.25    0.25
   2   4  11    0.00    0.16
   2   5 -18    4.22    0.17
   2   5 -17    3.05    0.17
   2   5 -16    2.67    0.13
   2   5 -15    0.45    0.14
   2   5 -14   21.36    0.24
   2   5 -13   26.76    0.65
   2   5 -12   11.77    0.27
   2   5 -11    8.36    0.08
   2   5 -10    2.64    0.23
   2   5  -9   81.85    3.09
   2   5  -8    9.88    0.49
   2   5  -7   24.03    0.41
   2   5  -6   33.02    0.09
   2   5  -3   75.15    1.96
   2   5  -2    0.04    0.12
   2   5  -1   32.70    0.15
   2   5   0  191.07   12.58
   2   5   1   17.00    0.55
   2   5   2   12.98    0.32
   2   5   3    4.04    0.22
   2   5   4   38.02    1.95
   2   5   5   37.07    0.43
   2   5   6    6.35    0.15
   2   5   7    5.21    0.38
   2   5   8    0.49    0.17
   2   5   9   14.41    0.96
   2   5  10    2.13    0.28
   2   5  11    1.99    0.23
   2   5  12    9.10    0.39
   2   6 -18    0.38    0.10
   2   6 -17    1.01    0.27
   2   6 -16    0.32    0.10
   2   6 -15   11.78    0.41
   2   6 -14    1.38    0.15
   2   6 -13    3.36    0.13
   2   6 -12    8.89    0.06
   2   6 -11    1.29    0.12
   2   6 -10   11.00    0.18
   2   6  -9  110.18    4.16
   2   6  -8   31.04    1.41
   2   6  -7   57.00    2.75
   2   6  -3    5.15    0.06
   2   6  -2   27.03    1.02
   2   6  -1   25.39    1.65
   2   6   0   40.95    0.15
   2   6   1    6.41    1.00
   2   6   2    0.01    0.17
   2   6   3   23.50    0.51
   2   6   4   16.36    0.10
   2   6   5    0.79    0.19
   2   6   6    9.47    0.23
   2   6   7    3.62    0.14
   2   6   8   20.81    1.05
   2   6   9    2.56    0.18
   2   6  10   22.15    1.05
   2   6  11    5.61    0.32
   2   7 -18    0.71    0.10
   2   7 -17    1.74    0.24
   2   7 -16    4.34    0.21
   2   7 -15    1.86    0.10
   2   7 -14    0.18    0.07
   2   7 -13   14.01    0.31
   2   7 -12   11.62    0.14
   2   7 -11    0.12    0.09
   2   7 -10   24.59    0.66
   2   7  -8   77.25    2.34
   2   7  -7   46.99    1.70
   2   7  -4    5.42    0.20
   2   7  -3   12.57    0.23
   2   7  -2  143.58    2.66
   2   7  -1   62.61    3.89
   2   7   0    7.42    0.10
   2   7   1   14.87    0.31
   2   7   2    3.38    0.27
   2   7   3    0.02    0.15
   2   7   4   14.02    0.58
   2   7   5    1.50    0.41
   2   7   6    4.34    0.20
   2   7   7    5.38    0.46
   2   7   8    1.98    0.33
   2   7   9    0.85    0.21
   2   7  10    0.59    0.16
   2   8 -18    0.34    0.07
   2   8 -17    2.08    0.12
   2   8 -16    0.35    0.08
   2   8 -15    3.82    0.13
   2   8 -14   54.13    1.16
   2   8 -13    3.80    0.12
   2   8 -12    4.19    0.08
   2   8 -11    5.76    0.20
   2   8 -10   33.68    0.48
   2   8  -9    9.69    0.18
   2   8  -8   76.05    2.42
   2   8  -7   26.92    0.86
   2   8  -6    0.88    0.18
   2   8  -4  100.92    2.28
   2   8  -3   42.65    0.79
   2   8  -2   13.02    0.39
   2   8  -1   10.96    0.16
   2   8   0   16.96    0.96
   2   8   1    3.95    0.13
   2   8   2    1.32    0.12
   2   8   3   10.09    0.28
   2   8   4    0.88    0.17
   2   8   5   13.57    0.65
   2   8   6   11.61    0.66
   2   8   7    1.10    0.21
   2   8   8    2.37    0.23
   2   8   9    1.01    0.21
   2   9 -18    0.51    0.10
   2   9 -17    1.11    0.27
   2   9 -16    0.64    0.08
   2   9 -15   17.29    0.45
   2   9 -14    3.69    0.14
   2   9 -13   12.73    0.25
   2   9 -12    6.74    0.18
   2   9 -11    6.51    0.19
   2   9 -10    3.94    0.10
   2   9  -9   15.92    0.46
   2   9  -8   28.31    0.69
   2   9  -7   22.93    0.44
   2   9  -6   10.79    0.28
   2   9  -4  130.84    3.33
   2   9  -3   16.33    0.79
   2   9  -2    2.49    0.10
   2   9  -1   19.17    0.35
   2   9   0   17.46    0.39
   2   9   1    7.53    0.21
   2   9   2    0.18    0.11
   2   9   3    6.59    0.18
   2   9   4    3.83    0.27
   2   9   5   10.32    0.51
   2   9   6    5.10    0.27
   2   9   7    1.48    0.24
   2   9   8    0.36    0.14
   2  10 -18    5.97    0.19
   2  10 -17    4.74    0.30
   2  10 -16    5.87    0.09
   2  10 -15    2.58    0.11
   2  10 -14    0.16    0.06
   2  10 -13    5.96    0.24
   2  10 -12    7.79    0.16
   2  10 -11    1.71    0.18
   2  10 -10   30.17    0.19
   2  10  -9    7.80    0.10
   2  10  -8    5.51    0.07
   2  10  -7   54.63    0.91
   2  10  -6   70.17    1.19
   2  10  -5   16.88    0.59
   2  10  -4   13.90    0.13
   2  10  -3   58.25    0.71
   2  10  -2    2.83    0.13
   2  10  -1    4.04    0.08
   2  10   0    0.54    0.08
   2  10   1   14.38    0.31
   2  10   2    9.25    0.30
   2  10   3   11.60    0.46
   2  10   4    1.64    0.24
   2  10   5    1.79    0.19
   2  10   6    7.04    0.50
   2  10   7    1.16    0.14
   2  11 -18   22.99    0.79
   2  11 -17    2.86    0.11
   2  11 -16    4.61    0.19
   2  11 -15    2.27    0.11
   2  11 -14    1.60    0.10
   2  11 -13    2.80    0.12
   2  11 -12   17.67    0.18
   2  11 -11    5.97    0.04
   2  11 -10   19.14    0.47
   2  11  -9   26.09    0.16
   2  11  -8    6.59    0.13
   2  11  -7   10.78    0.05
   2  11  -6   29.00    0.41
   2  11  -5   14.44    0.55
   2  11  -4   12.53    0.08
   2  11  -3   18.93    0.30
   2  11  -2    1.51    0.08
   2  11  -1    7.29    0.24
   2  11   0   15.58    0.32
   2  11   1    3.11    0.07
   2  11   2    0.69    0.07
   2  11   3    3.04    0.14
   2  11   4    0.89    0.15
   2  11   5    1.73    0.21
   2  11   6    3.69    0.29
   2  12 -18    0.99    0.08
   2  12 -17    0.29    0.06
   2  12 -16    2.24    0.18
   2  12 -15    2.26    0.04
   2  12 -14    1.16    0.10
   2  12 -13    1.24    0.06
   2  12 -12    5.64    0.17
   2  12 -11   41.17    0.51
   2  12 -10    1.79    0.18
   2  12  -9   22.69    0.38
   2  12  -8   16.22    0.32
   2  12  -7   21.49    0.50
   2  12  -6   10.21    0.22
   2  12  -5   25.99    0.15
   2  12  -4   19.18    0.42
   2  12  -3   12.29    0.20
   2  12  -2    8.73    0.21
   2  12  -1    2.13    0.06
   2  12   0    6.30    0.16
   2  12   1    3.20    0.10
   2  12   2    1.88    0.10
   2  12   3    2.28    0.26
   2  12   4    1.20    0.14
   2  12   5    2.06    0.29
   2  13 -17    2.44    0.07
   2  13 -16    4.12    0.12
   2  13 -15    3.11    0.17
   2  13 -14    7.85    0.13
   2  13 -13    4.51    0.23
   2  13 -12   24.03    0.58
   2  13 -11   29.22    0.56
   2  13 -10   26.02    0.37
   2  13  -9    0.54    0.09
   2  13  -8   11.20    0.21
   2  13  -7   15.74    0.17
   2  13  -6  131.04    2.69
   2  13  -5   27.03    0.25
   2  13  -4    3.39    0.11
   2  13  -3    2.34    0.12
   2  13  -2    6.34    0.19
   2  13  -1   25.63    0.75
   2  13   0    6.98    0.82
   2  13   1    2.95    0.11
   2  13   2   14.28    0.60
   2  13   3    0.46    0.08
   2  13   4    1.25    0.13
   2  14 -18    1.45    0.18
   2  14 -17    3.48    0.13
   2  14 -16    4.73    0.22
   2  14 -15    0.09    0.07
   2  14 -14    2.50    0.07
   2  14 -13    3.09    0.08
   2  14 -12    0.26    0.12
   2  14 -11    2.20    0.06
   2  14 -10    9.50    0.36
   2  14  -9    3.98    0.38
   2  14  -8    0.00    0.04
   2  14  -7    1.73    0.05
   2  14  -6    8.37    0.25
   2  14  -5   10.56    0.30
   2  14  -4    8.24    0.14
   2  14  -3    0.01    0.07
   2  14  -2    0.21    0.09
   2  14  -1    5.72    0.20
   2  14   0   14.90    0.54
   2  14   1    1.71    0.23
   2  14   2    2.98    0.14
   2  15 -17    1.83    0.08
   2  15 -16    2.14    0.11
   2  15 -15    4.83    0.19
   2  15 -14    2.60    0.16
   2  15 -13   11.79    0.31
   2  15 -12    1.79    0.05
   2  15 -11    0.40    0.06
   2  15 -10    0.71    0.06
   2  15  -9   10.71    0.23
   2  15  -8    7.51    0.12
   2  15  -7    3.47    0.09
   2  15  -6    5.82    0.13
   2  15  -5    1.22    0.10
   2  15  -4    6.01    0.46
   2  15  -3    0.75    0.12
   2  15  -2    1.48    0.19
   2  15  -1    0.06    0.16
   2  15   0    6.00    0.22
   2  15   1    0.96    0.12
   2  16 -16    0.01    0.04
   2  16 -15    4.73    0.17
   2  16 -14    0.39    0.08
   2  16 -13    2.43    0.10
   2  16 -12    5.54    0.26
   2  16 -11    1.73    0.08
   2  16 -10    1.55    0.06
   2  16  -9    2.89    0.06
   2  16  -8   10.39    0.26
   2  16  -7    0.13    0.08
   2  16  -6   20.03    0.30
   2  16  -5    3.70    0.08
   2  16  -4    3.81    0.06
   2  16  -3    3.36    0.21
   2  16  -2    0.32    0.05
   2  16  -1    1.27    0.09
   2  17 -15    1.18    0.06
   2  17 -14    3.05    0.11
   2  17 -13    5.06    0.23
   2  17 -12    3.20    0.07
   2  17 -11    4.35    0.13
   2  17 -10    2.32    0.12
   2  17  -9    1.66    0.05
   2  17  -8    8.90    0.13
   2  17  -7    8.66    0.20
   2  17  -6    1.07    0.12
   2  17  -5    1.52    0.14
   2  17  -4    0.03    0.05
   2  17  -3    1.39    0.13
   2  18 -13    1.79    0.10
   2  18 -12    0.15    0.05
   2  18 -11    1.62    0.09
   2  18 -10    1.08    0.07
   2  18  -8    1.25    0.09
   2  18  -7    0.36    0.10
   2  18  -6    0.20    0.15
   3  -9  -8    2.75    0.35
   3  -9  -7   10.74    0.74
   3  -8 -10    1.15    0.18
   3  -8  -9    5.35    0.47
   3  -8  -8    9.66    0.51
   3  -8  -7    2.22    0.29
   3  -8  -6    7.68    0.60
   3  -8  -5    1.15    0.19
   3  -8   3   44.04    3.08
   3  -7 -11    1.89    0.19
   3  -7 -10    0.40    0.13
   3  -7  -9    3.38    0.16
   3  -7  -8    5.07    0.60
   3  -7  -7    6.06    0.37
   3  -7  -6    4.55    0.24
   3  -7  -5    1.25    0.21
   3  -7  -3   34.20    2.09
   3  -7  -2   49.85    0.60
   3  -7   2   54.46    2.09
   3  -7   3   11.88    1.27
   3  -7   4   59.24    4.44
   3  -6 -12    1.72    0.28
   3  -6 -11    0.07    0.14
   3  -6 -10    0.97    0.18
   3  -6  -9    3.04    0.18
   3  -6  -8    2.68    0.13
   3  -6  -7    7.42    0.25
   3  -6  -6    0.45    0.14
   3  -6  -5    8.50    0.47
   3  -6  -4    4.99    0.20
   3  -6  -3   10.74    0.51
   3  -6   2    7.42    0.16
   3  -6   3   45.35    0.73
   3  -6   4    9.59    0.88
   3  -6   5   16.20    0.21
   3  -6   6   45.48    1.40
   3  -6   7   14.79    2.02
   3  -5 -13    0.43    0.10
   3  -5 -12    0.72    0.13
   3  -5 -11    3.06    0.17
   3  -5 -10    0.01    0.14
   3  -5  -9    3.09    0.19
   3  -5  -8   10.96    0.29
   3  -5  -7   17.82    0.23
   3  -5  -6    6.45    0.29
   3  -5  -5    9.92    0.31
   3  -5  -4  102.90    3.61
   3  -5   1   25.55    0.16
   3  -5   2   24.48    2.49
   3  -5   3   16.26    0.30
   3  -5   4    8.92    0.15
   3  -5   5    7.86    0.16
   3  -5   6  191.19    6.18
   3  -5   7   29.97    2.37
   3  -5   8   13.42    1.60
   3  -5   9    9.79    0.49
   3  -5  10   45.29    1.77
   3  -4 -14    1.25    0.11
   3  -4 -13    2.24    0.16
   3  -4 -12    1.30    0.15
   3  -4 -11    5.54    0.44
   3  -4 -10   15.60    0.43
   3  -4  -9    6.18    0.24
   3  -4  -8    2.54    0.25
   3  -4  -7    0.93    0.10
   3  -4  -6    4.03    0.30
   3  -4  -5   11.51    0.13
   3  -4  -4   23.64    1.49
   3  -4  -3   20.35    1.00
   3  -4  -2   24.46    0.43
   3  -4  -1   30.84    0.34
   3  -4   0    2.40    0.48
   3  -4   1   16.30    0.20
   3  -4   2   48.63    3.27
   3  -4   3    1.22    0.23
   3  -4   4   90.91    4.01
   3  -4   5   45.85    2.27
   3  -4   6   13.09    0.48
   3  -4   7   90.68    1.72
   3  -4   8   64.61    3.57
   3  -4   9    1.68    0.31
   3  -4  10   56.22    2.11
   3  -4  11    4.33    0.20
   3  -4  12   21.16    1.15
   3  -3 -14    0.11    0.12
   3  -3 -13    1.30    0.13
   3  -3 -12    7.05    0.82
   3  -3 -11    8.23    0.46
   3  -3 -10    0.43    0.10
   3  -3  -9    4.22    0.16
   3  -3  -8    5.55    0.12
   3  -3  -7    6.59    0.07
   3  -3  -6    9.56    1.33
   3  -3  -5   10.53    0.38
   3  -3  -3   86.74    2.68
   3  -3  -2   46.46    1.45
   3  -3  -1    8.19    0.70
   3  -3   0   84.81    2.24
   3  -3   1   12.04    0.58
   3  -3   2   40.29    2.66
   3  -3   3    0.06    0.13
   3  -3   4   21.27    0.40
   3  -3   5   27.70    0.59
   3  -3   6   62.79    1.68
   3  -3   7   16.93    1.13
   3  -3   8  116.93    2.80
   3  -3   9    0.53    0.16
   3  -3  10   14.67    0.71
   3  -3  11   17.64    0.71
   3  -3  12    3.40    0.32
   3  -2 -15    0.51    0.11
   3  -2 -14    0.22    0.12
   3  -2 -13    4.97    0.35
   3  -2 -12    0.00    0.14
   3  -2 -11    3.78    0.20
   3  -2 -10   13.33    0.30
   3  -2  -9   10.94    0.65
   3  -2  -8   19.82    0.64
   3  -2  -7    6.40    0.11
   3  -2  -6   27.97    1.24
   3  -2  -5   17.10    1.21
   3  -2  -4   16.43    0.42
   3  -2  -3   51.15    0.99
   3  -2  -2    1.39    0.08
   3  -2  -1   14.89    0.52
   3  -2   0    5.69    0.13
   3  -2   1  120.83    3.36
   3  -2   2   65.24    1.72
   3  -2   3    2.47    0.09
   3  -2   4   40.51    1.18
   3  -2   5   64.01    1.04
   3  -2   6   30.63    0.85
   3  -2   7    1.85    0.31
   3  -2   8   13.36    0.95
   3  -2  10    1.02    0.21
   3  -2  11   21.23    0.88
   3  -2  12    0.93    0.29
   3  -1 -15    0.03    0.11
   3  -1 -14    1.56    0.15
   3  -1 -13    1.19    0.30
   3  -1 -12    3.18    0.19
   3  -1 -11    1.64    0.11
   3  -1 -10    7.83    0.28
   3  -1  -9    3.95    0.18
   3  -1  -8   20.66    0.69
   3  -1  -7   17.49    1.18
   3  -1  -6   52.51    0.74
   3  -1  -5   55.62    1.08
   3  -1  -4    7.29    0.21
   3  -1  -3   19.14    0.29
   3  -1  -2    0.60    0.07
   3  -1  -1    9.88    0.28
   3  -1   0   17.98    0.31
   3  -1   1   39.04    0.71
   3  -1   2   33.13    1.26
   3  -1   3  101.25    0.86
   3  -1   4    3.57    0.27
   3  -1   5   11.37    0.64
   3  -1   6   53.35    1.46
   3  -1   7   23.84    1.18
   3  -1   8   15.32    0.40
   3  -1  10    9.28    0.46
   3  -1  11    1.36    0.31
   3   0 -16    0.25    0.10
   3   0 -15    3.23    0.43
   3   0 -14    0.83    0.14
   3   0 -13    0.88    0.32
   3   0 -12   17.09    0.29
   3   0 -11    1.42    0.12
   3   0 -10    2.19    0.19
   3   0  -9    8.05    0.42
   3   0  -8   24.12    0.56
   3   0  -7   85.22    4.46
   3   0  -6   35.33    1.73
   3   0  -5   13.16    0.65
   3   0  -4   10.10    1.57
   3   0  -3   18.74    0.17
   3   0  -2    9.49    0.15
   3   0  -1    0.58    0.29
   3   0   0   11.85    0.15
   3   0   1    4.66    0.04
   3   0   2   72.94    2.80
   3   0   3   88.41    3.66
   3   0   4   52.85    0.56
   3   0   5    2.18    0.13
   3   0   6    0.19    0.12
   3   0   7   86.55    2.35
   3   0   8    0.61    0.30
   3   0   9   33.48    0.66
   3   0  10    5.51    0.42
   3   0  11    1.49    0.25
   3   1 -16    0.03    0.10
   3   1 -15    1.43    0.17
   3   1 -14    3.76    0.17
   3   1 -13   22.39    0.74
   3   1 -12   18.40    0.71
   3   1 -11    1.87    0.09
   3   1 -10    1.93    0.14
   3   1  -9    1.72    0.26
   3   1  -8   66.58    2.59
   3   1  -7    0.43    0.56
   3   1  -6    6.30    0.19
   3   1  -5    0.40    0.26
   3   1  -4  152.69    7.22
   3   1  -1   39.62    0.98
   3   1   0   43.22    0.56
   3   1   1  194.50    2.89
   3   1   2   50.02    0.30
   3   1   3   11.03    1.78
   3   1   4   59.91    2.12
   3   1   5   45.58    1.21
   3   1   6    4.31    0.16
   3   1   7   31.16    0.86
   3   1   8    9.95    0.38
   3   1   9   30.96    1.23
   3   1  10    8.92    0.36
   3   2 -17    0.24    0.12
   3   2 -16    1.88    0.15
   3   2 -15    0.17    0.09
   3   2 -14   11.73    0.56
   3   2 -13    0.41    0.07
   3   2 -12    1.98    0.12
   3   2 -11   25.00    0.73
   3   2 -10    0.18    0.13
   3   2  -9    0.06    0.32
   3   2  -8    3.95    0.56
   3   2  -7   24.92    0.38
   3   2  -6   30.77    0.46
   3   2  -5   65.46    1.21
   3   2  -1   42.28    0.54
   3   2   0   84.67    1.02
   3   2   1    3.80    0.06
   3   2   2   72.62    1.02
   3   2   3  114.17    3.95
   3   2   4   45.59    2.64
   3   2   5   69.94    1.98
   3   2   6    4.24    0.20
   3   2   7   34.91    1.74
   3   2   8   11.28    0.28
   3   2   9    3.10    0.20
   3   2  10    1.25    0.30
   3   3 -17    0.50    0.11
   3   3 -16    9.97    0.25
   3   3 -15    1.43    0.18
   3   3 -14    1.83    0.15
   3   3 -13   11.24    0.27
   3   3 -12    9.95    0.26
   3   3 -11   14.90    0.25
   3   3 -10   17.08    1.16
   3   3  -9    0.02    0.26
   3   3  -8    6.99    0.32
   3   3  -7   19.37    0.36
   3   3  -6    0.54    0.17
   3   3  -5    5.03    0.33
   3   3  -4    3.70    0.05
   3   3  -3   61.75    2.39
   3   3  -2  214.58   12.28
   3   3  -1  104.08    5.80
   3   3   0   11.44    1.11
   3   3   1    1.32    0.46
   3   3   2    4.37    0.18
   3   3   3   13.88    0.11
   3   3   4   11.10    0.83
   3   3   5   44.86    0.86
   3   3   6   12.40    0.67
   3   3   7   10.78    0.51
   3   3   8   26.60    0.72
   3   3   9    9.48    0.32
   3   3  10    1.23    0.26
   3   3  11    1.28    0.27
   3   4 -17    0.10    0.10
   3   4 -16    3.94    0.23
   3   4 -15    5.38    0.16
   3   4 -14    0.27    0.13
   3   4 -13   20.54    0.37
   3   4 -12    9.35    0.21
   3   4 -11    5.53    0.10
   3   4 -10   10.71    0.32
   3   4  -9   52.65    2.46
   3   4  -8   10.36    1.16
   3   4  -7   34.80    1.59
   3   4  -6    8.95    0.77
   3   4  -2   28.03    0.10
   3   4  -1   21.71    0.20
   3   4   0   15.31    0.74
   3   4   1   10.10    0.93
   3   4   2    3.81    0.59
   3   4   3   13.31    0.07
   3   4   4    4.20    0.11
   3   4   5    1.77    0.16
   3   4   6   24.76    0.72
   3   4   7    4.34    0.13
   3   4   8    2.56    0.12
   3   4   9   16.06    0.76
   3   4  10    0.30    0.20
   3   4  11    2.25    0.20
   3   4  12    4.27    0.29
   3   5 -18    5.14    0.28
   3   5 -17    2.98    0.13
   3   5 -16    0.78    0.16
   3   5 -15   17.73    0.54
   3   5 -14    2.89    0.23
   3   5 -13    6.81    0.19
   3   5 -12   21.97    0.35
   3   5 -11   46.11    0.48
   3   5 -10   22.53    0.81
   3   5  -9   53.55    1.69
   3   5  -8    9.79    0.22
   3   5  -7    2.47    0.35
   3   5  -3    9.02    0.33
   3   5  -2    4.86    0.58
   3   5  -1   43.62    1.34
   3   5   0   29.22    0.54
   3   5   1   28.69    0.66
   3   5   2    2.91    0.44
   3   5   3    8.57    0.37
   3   5   4    8.52    0.36
   3   5   5   13.70    0.27
   3   5   6   42.48    0.66
   3   5   7   13.08    0.25
   3   5   8    7.59    0.58
   3   5   9    1.59    0.23
   3   5  10    6.61    0.45
   3   5  11    0.51    0.19
   3   6 -18    0.54    0.13
   3   6 -17   12.03    0.38
   3   6 -16    8.35    0.29
   3   6 -15   10.21    0.25
   3   6 -14   10.94    0.35
   3   6 -13    2.56    0.19
   3   6 -12    0.08    0.05
   3   6 -11   12.29    0.14
   3   6 -10    0.97    0.06
   3   6  -8    8.75    0.17
   3   6  -7   29.84    0.93
   3   6  -3   12.45    0.14
   3   6  -2   65.10    2.12
   3   6  -1   33.18    0.50
   3   6   0   11.56    0.88
   3   6   1    0.45    0.16
   3   6   2    6.12    0.61
   3   6   3    6.30    0.36
   3   6   4   25.07    0.42
   3   6   5    5.03    0.34
   3   6   6    0.26    0.18
   3   6   7    3.23    0.40
   3   6   8    4.27    0.28
   3   6   9    0.75    0.23
   3   6  10    8.47    0.42
   3   6  11    0.99    0.18
   3   7 -18    1.40    0.14
   3   7 -17   18.57    0.56
   3   7 -16    6.65    0.16
   3   7 -15    1.20    0.10
   3   7 -14   17.20    0.22
   3   7 -13   22.32    0.54
   3   7 -12   25.27    0.27
   3   7 -11    3.56    0.08
   3   7 -10    1.79    0.16
   3   7  -9    1.99    0.06
   3   7  -8   54.26    3.82
   3   7  -7   40.50    0.68
   3   7  -6   10.48    0.41
   3   7  -3   28.85    1.07
   3   7  -2    3.51    0.19
   3   7  -1    1.05    0.21
   3   7   0    9.16    0.38
   3   7   1   19.46    0.58
   3   7   2   13.99    0.37
   3   7   3   18.61    0.27
   3   7   4   25.25    0.67
   3   7   5    7.66    0.32
   3   7   6    2.13    0.31
   3   7   7    3.12    0.27
   3   7   8   10.39    0.60
   3   7   9    0.71    0.16
   3   7  10    3.88    0.29
   3   8 -18    0.71    0.09
   3   8 -17    1.18    0.14
   3   8 -16   20.17    0.53
   3   8 -15    5.80    0.16
   3   8 -14    5.46    0.23
   3   8 -13    1.95    0.11
   3   8 -12   16.42    0.30
   3   8 -11    8.96    0.21
   3   8 -10   44.26    0.47
   3   8  -9    9.74    0.47
   3   8  -8    3.81    0.30
   3   8  -7    8.04    0.51
   3   8  -6   19.08    0.52
   3   8  -4    4.91    0.21
   3   8  -3   21.87    0.30
   3   8  -2    6.80    0.55
   3   8  -1   28.76    1.17
   3   8   0   10.28    0.56
   3   8   1    1.03    0.15
   3   8   2   14.60    0.36
   3   8   3    3.27    0.23
   3   8   4   19.18    0.66
   3   8   5    5.27    0.36
   3   8   6    2.72    0.22
   3   8   7    0.57    0.16
   3   8   8    0.53    0.18
   3   8   9    0.80    0.14
   3   9 -18    3.62    0.17
   3   9 -17    0.13    0.07
   3   9 -16    8.96    0.24
   3   9 -15    0.60    0.09
   3   9 -14    4.13    0.06
   3   9 -13    7.29    0.26
   3   9 -12   12.22    0.08
   3   9 -11   12.77    0.09
   3   9 -10   30.29    0.48
   3   9  -9    3.48    0.21
   3   9  -8    6.89    0.25
   3   9  -7   22.71    0.86
   3   9  -6   19.11    0.60
   3   9  -5   12.03    0.59
   3   9  -4    0.62    0.11
   3   9  -3    4.64    0.17
   3   9  -2    6.56    0.16
   3   9  -1    3.69    0.29
   3   9   0   13.47    0.28
   3   9   1    3.92    0.15
   3   9   2    9.65    0.34
   3   9   3   13.06    0.41
   3   9   4    8.87    0.46
   3   9   5    1.79    0.25
   3   9   6    3.43    0.33
   3   9   7    1.32    0.20
   3   9   8    1.36    0.17
   3  10 -18    5.60    0.17
   3  10 -17    1.42    0.15
   3  10 -16    4.54    0.15
   3  10 -15    2.08    0.13
   3  10 -14   11.54    0.39
   3  10 -13    0.29    0.10
   3  10 -12   22.26    0.77
   3  10 -11   11.82    0.30
   3  10 -10   10.56    0.23
   3  10  -9    2.68    0.07
   3  10  -8    2.95    0.11
   3  10  -7    6.26    0.13
   3  10  -6    1.72    0.06
   3  10  -5   32.33    0.75
   3  10  -4    7.36    0.30
   3  10  -3    6.29    0.32
   3  10  -2    5.79    0.07
   3  10  -1   14.76    0.26
   3  10   0    2.74    0.10
   3  10   1    1.35    0.11
   3  10   2    7.95    0.16
   3  10   3    1.44    0.21
   3  10   4    2.25    0.17
   3  10   5    0.31    0.18
   3  10   6    0.16    0.15
   3  10   7    3.56    0.25
   3  11 -18    9.54    0.47
   3  11 -17    6.34    0.13
   3  11 -16    7.30    0.12
   3  11 -15    4.27    0.20
   3  11 -14    4.47    0.14
   3  11 -13    2.06    0.10
   3  11 -12   10.41    0.13
   3  11 -11   17.79    0.39
   3  11 -10    2.41    0.08
   3  11  -9    4.33    0.27
   3  11  -8    6.92    0.04
   3  11  -7    0.92    0.04
   3  11  -6    9.71    0.13
   3  11  -5    1.60    0.07
   3  11  -4    7.34    0.04
   3  11  -3    5.73    0.39
   3  11  -2    1.27    0.17
   3  11  -1    0.93    0.09
   3  11   0    7.30    0.16
   3  11   1   14.49    0.49
   3  11   2    2.50    0.23
   3  11   3    1.29    0.14
   3  11   4    2.28    0.15
   3  11   5    0.38    0.19
   3  11   6    4.44    0.32
   3  12 -18    0.53    0.07
   3  12 -17    0.72    0.09
   3  12 -16    3.45    0.11
   3  12 -15    6.96    0.40
   3  12 -14   13.11    0.11
   3  12 -13    1.17    0.06
   3  12 -12    2.27    0.09
   3  12 -11   24.83    0.28
   3  12 -10   14.72    0.14
   3  12  -9    0.73    0.16
   3  12  -8    0.07    0.07
   3  12  -7    6.43    0.12
   3  12  -6   36.34    0.40
   3  12  -5    3.93    0.14
   3  12  -4    7.15    0.09
   3  12  -3    1.84    0.22
   3  12  -2    5.24    0.22
   3  12  -1    7.54    0.18
   3  12   0   14.81    0.47
   3  12   1    2.17    0.17
   3  12   2    1.53    0.09
   3  12   3    0.64    0.13
   3  12   4    0.64    0.09
   3  12   5    0.48    0.12
   3  13 -17    9.57    0.16
   3  13 -16    3.62    0.10
   3  13 -15    6.32    0.07
   3  13 -14    2.09    0.18
   3  13 -13   21.28    0.39
   3  13 -12    5.44    0.12
   3  13 -11    1.05    0.06
   3  13 -10    1.81    0.12
   3  13  -9    9.45    0.26
   3  13  -8    2.93    0.19
   3  13  -7    3.72    0.14
   3  13  -6    0.03    0.06
   3  13  -5    0.39    0.08
   3  13  -4   11.49    0.29
   3  13  -3    2.53    0.28
   3  13  -2    5.53    0.13
   3  13  -1    2.81    0.11
   3  13   0    2.70    0.09
   3  13   1    6.26    0.51
   3  13   2    0.75    0.16
   3  13   3    1.04    0.09
   3  14 -17    1.96    0.12
   3  14 -16    9.97    0.28
   3  14 -15    6.61    0.14
   3  14 -14    0.60    0.14
   3  14 -13    3.76    0.11
   3  14 -12    2.95    0.15
   3  14 -11    8.20    0.18
   3  14 -10    7.74    0.24
   3  14  -9    1.65    0.13
   3  14  -8    8.23    0.12
   3  14  -7   15.66    0.24
   3  14  -6    3.82    0.11
   3  14  -5   11.69    0.19
   3  14  -4    1.43    0.15
   3  14  -3    6.54    0.14
   3  14  -2    5.25    0.18
   3  14  -1   12.22    0.45
   3  14   0    2.18    0.17
   3  14   1    1.04    0.10
   3  15 -17    0.66    0.05
   3  15 -16    2.28    0.08
   3  15 -15   19.13    0.43
   3  15 -14    5.18    0.16
   3  15 -13    1.96    0.09
   3  15 -12    1.65    0.12
   3  15 -11    7.28    0.15
   3  15 -10    1.58    0.14
   3  15  -9    1.37    0.06
   3  15  -8    0.26    0.07
   3  15  -7    4.90    0.20
   3  15  -6    1.45    0.09
   3  15  -5   12.28    0.16
   3  15  -4    7.10    0.23
   3  15  -3    0.25    0.12
   3  15  -2    0.18    0.06
   3  15  -1    2.81    0.30
   3  15   0    0.21    0.10
   3  16 -16    0.57    0.10
   3  16 -15    1.49    0.09
   3  16 -14    6.34    0.13
   3  16 -13    2.69    0.20
   3  16 -12    4.96    0.19
   3  16 -11    2.83    0.13
   3  16 -10    1.34    0.07
   3  16  -9    0.53    0.07
   3  16  -8    2.34    0.06
   3  16  -7   16.40    0.31
   3  16  -6    3.68    0.23
   3  16  -5    2.72    0.13
   3  16  -4    3.32    0.11
   3  16  -3    6.21    0.14
   3  16  -2    0.37    0.05
   3  17 -15    1.05    0.10
   3  17 -14    3.87    0.20
   3  17 -13    0.70    0.11
   3  17 -12    1.99    0.05
   3  17 -11    1.12    0.08
   3  17 -10    1.34    0.08
   3  17  -9    0.32    0.06
   3  17  -8    0.47    0.07
   3  17  -7    0.80    0.06
   3  17  -6    0.43    0.05
   3  17  -5    2.07    0.14
   3  17  -4    2.65    0.20
   3  18 -12    1.70    0.10
   3  18 -11    0.63    0.06
   3  18 -10    2.08    0.11
   3  18  -9    0.36    0.05
   3  18  -8    6.98    0.43
   3  18  -7    2.10    0.16
   4  -9  -7    0.96    0.26
   4  -9  -6    1.53    0.19
   4  -8  -9    0.68    0.17
   4  -8  -8    0.02    0.18
   4  -8  -7   21.84    1.05
   4  -8  -6    1.88    0.18
   4  -8  -5    1.68    0.28
   4  -8   3   27.81    2.01
   4  -8   4    0.91    0.27
   4  -7 -11    3.82    0.31
   4  -7 -10    0.05    0.12
   4  -7  -9    2.86    0.20
   4  -7  -8    7.10    0.20
   4  -7  -7    0.66    0.19
   4  -7  -6    5.54    0.20
   4  -7  -5    2.28    0.23
   4  -7  -4   30.99    0.90
   4  -7  -3    7.87    0.28
   4  -7   2   12.91    0.65
   4  -7   3  164.02    5.05
   4  -7   4    7.99    0.99
   4  -7   5   73.82    1.40
   4  -7   6   52.48    1.71
   4  -6 -12    3.79    0.21
   4  -6 -11    0.20    0.23
   4  -6 -10    3.54    0.21
   4  -6  -9    1.12    0.19
   4  -6  -8   12.80    0.30
   4  -6  -7   13.20    0.43
   4  -6  -6    3.09    0.15
   4  -6  -5    4.18    0.23
   4  -6  -4    4.50    0.16
   4  -6   2   15.08    0.23
   4  -6   3   92.82    1.72
   4  -6   4    5.18    1.47
   4  -6   5   32.47    2.66
   4  -6   6   18.83    1.03
   4  -6   7   25.62    1.17
   4  -6   8    4.17    0.30
   4  -6   9   36.20    1.70
   4  -5 -13    1.94    0.21
   4  -5 -12    0.26    0.11
   4  -5 -11    2.48    0.21
   4  -5 -10   10.52    0.32
   4  -5  -9    5.05    0.24
   4  -5  -8    1.44    0.18
   4  -5  -7    0.15    0.10
   4  -5  -6    1.23    0.21
   4  -5  -5   70.27    2.45
   4  -5   1   51.69    0.92
   4  -5   2   36.25    0.94
   4  -5   3  108.05    5.28
   4  -5   4   35.91    1.67
   4  -5   5   25.90    0.18
   4  -5   6    3.13    0.34
   4  -5   7   58.96    2.47
   4  -5   8   10.88    0.17
   4  -5   9    4.95    0.34
   4  -5  10   18.71    0.62
   4  -5  11   11.26    1.15
   4  -4 -14    0.05    0.10
   4  -4 -13    1.78    0.13
   4  -4 -12    1.50    0.19
   4  -4 -11   12.50    0.53
   4  -4 -10   11.98    0.60
   4  -4  -9   23.83    0.56
   4  -4  -8   24.18    0.53
   4  -4  -7   10.60    0.26
   4  -4  -6   21.48    0.47
   4  -4  -5   23.89    0.52
   4  -4  -4   45.97    2.82
   4  -4  -3   63.49    0.54
   4  -4  -2    8.36    0.38
   4  -4  -1   68.69    2.14
   4  -4   0   32.51    1.03
   4  -4   1  300.77    7.31
   4  -4   2   41.52    0.18
   4  -4   3   16.05    0.35
   4  -4   4   55.09    2.65
   4  -4   5   37.05    3.76
   4  -4   6    9.39    0.32
   4  -4   7    9.08    0.35
   4  -4   8   99.28    4.39
   4  -4   9   13.79    0.23
   4  -4  10    8.02    0.44
   4  -4  11    4.63    0.31
   4  -4  12    4.29    0.34
   4  -3 -14    0.85    0.11
   4  -3 -13    2.39    0.19
   4  -3 -12    2.34    0.16
   4  -3 -11    6.57    0.29
   4  -3 -10    9.73    0.49
   4  -3  -9    9.73    0.18
   4  -3  -8   11.00    0.15
   4  -3  -7   35.79    0.81
   4  -3  -6    0.70    0.08
   4  -3  -5   38.88    0.93
   4  -3  -4   14.24    0.14
   4  -3  -3   13.07    1.19
   4  -3  -2   35.97    0.23
   4  -3  -1   65.69    3.73
   4  -3   0   41.47    1.07
   4  -3   1   30.67    1.03
   4  -3   2  309.83   11.93
   4  -3   3   57.14    0.09
   4  -3   4   38.82    1.26
   4  -3   5   13.31    0.17
   4  -3   6  160.88    5.56
   4  -3   7   18.23    0.40
   4  -3   8   16.12    0.39
   4  -3   9    6.18    0.22
   4  -3  10    5.64    0.55
   4  -3  11    2.26    0.51
   4  -2 -15    0.70    0.15
   4  -2 -14    2.92    0.21
   4  -2 -13    6.99    0.30
   4  -2 -12    1.00    0.14
   4  -2 -11    3.69    0.12
   4  -2 -10    2.66    0.21
   4  -2  -9   17.68    0.64
   4  -2  -8    2.96    0.33
   4  -2  -7   31.17    1.48
   4  -2  -6   21.36    0.27
   4  -2  -5    2.81    0.08
   4  -2  -4   21.21    1.51
   4  -2  -3   60.88    1.02
   4  -2  -2  164.64    9.24
   4  -2  -1   55.33    5.78
   4  -2   0  177.80    4.37
   4  -2   1  229.39   12.38
   4  -2   2  129.73    3.31
   4  -2   3  145.15    8.42
   4  -2   4   35.09    0.56
   4  -2   5   20.87    1.06
   4  -2   6   49.37    0.44
   4  -2   7    2.84    0.60
   4  -2   8    8.59    0.24
   4  -2   9    2.01    0.31
   4  -2  10    4.39    0.29
   4  -2  11    7.88    0.52
   4  -1 -16    0.77    0.15
   4  -1 -15    1.47    0.22
   4  -1 -14    3.31    0.31
   4  -1 -13    3.11    0.26
   4  -1 -12    5.23    0.22
   4  -1 -11    5.26    0.15
   4  -1 -10    3.17    0.26
   4  -1  -9    3.53    0.09
   4  -1  -8   10.79    0.76
   4  -1  -7   15.07    1.20
   4  -1  -6  163.45    5.81
   4  -1  -5   13.55    0.26
   4  -1  -4   61.32    3.60
   4  -1  -3   78.51    1.99
   4  -1  -2   58.90    0.33
   4  -1  -1   77.43    4.74
   4  -1   0  436.10    7.02
   4  -1   1   28.87    2.67
   4  -1   2   16.19    0.07
   4  -1   3   25.74    0.55
   4  -1   4   62.22    0.92
   4  -1   5    7.47    0.79
   4  -1   6  127.30    4.13
   4  -1   7    3.40    0.17
   4  -1   8    5.75    0.57
   4  -1   9    3.24    0.22
   4  -1  10    8.21    0.75
   4  -1  11    4.98    0.48
   4   0 -16    0.09    0.13
   4   0 -15    0.39    0.12
   4   0 -14    1.12    0.14
   4   0 -13    8.77    0.41
   4   0 -12   15.08    0.53
   4   0 -11    4.27    0.17
   4   0 -10    2.31    0.15
   4   0  -9    1.79    0.20
   4   0  -8   45.13    1.29
   4   0  -7   20.64    0.06
   4   0  -6   11.36    0.47
   4   0  -5   38.10    2.43
   4   0  -4   70.84    2.40
   4   0  -3   11.42    0.06
   4   0  -2  123.87    0.92
   4   0  -1   13.65    0.76
   4   0   0  298.65    7.19
   4   0   1    2.94    0.58
   4   0   2   89.59    2.67
   4   0   3    1.15    0.25
   4   0   4  121.17    3.75
   4   0   5    1.30    0.26
   4   0   6    6.22    0.31
   4   0   7   17.12    0.79
   4   0   8    2.96    0.22
   4   0   9    3.76    0.42
   4   0  10    1.03    0.17
   4   1 -16    1.10    0.10
   4   1 -15    4.53    0.13
   4   1 -14   26.46    0.43
   4   1 -13   20.02    0.49
   4   1 -12    3.26    0.12
   4   1 -11    4.39    0.41
   4   1 -10   21.53    0.47
   4   1  -9    7.21    0.48
   4   1  -8   23.54    0.64
   4   1  -7    3.44    0.21
   4   1  -6   43.60    1.20
   4   1  -5    8.96    1.76
   4   1  -4   28.86    2.07
   4   1  -3   56.05    1.26
   4   1  -1  185.31    5.49
   4   1   0   15.66    0.82
   4   1   1   77.87    2.34
   4   1   2  186.21    2.35
   4   1   3   32.37    0.47
   4   1   4    2.66    0.45
   4   1   5  115.53    2.41
   4   1   6    2.71    0.12
   4   1   7   17.89    1.62
   4   1   8    0.66    0.21
   4   1   9    6.53    0.18
   4   1  10    2.06    0.12
   4   2 -17    0.13    0.08
   4   2 -16    6.82    0.20
   4   2 -15    5.59    0.28
   4   2 -14    8.32    0.30
   4   2 -13    7.03    0.20
   4   2 -12    4.63    0.12
   4   2 -11    3.63    0.40
   4   2 -10    7.76    1.27
   4   2  -9    4.81    0.22
   4   2  -8   11.46    0.38
   4   2  -7    8.96    0.38
   4   2  -6   19.58    0.19
   4   2  -4  233.17    4.31
   4   2  -3  102.89    3.65
   4   2  -2  189.18    9.07
   4   2  -1  100.71    3.15
   4   2   0   17.46    0.30
   4   2   1   77.32    0.70
   4   2   2    0.46    0.09
   4   2   3   58.53    1.04
   4   2   4   15.36    0.71
   4   2   5   28.89    0.31
   4   2   6    1.31    0.09
   4   2   7    3.84    0.10
   4   2   8    2.91    0.30
   4   2   9   11.85    0.20
   4   2  10   14.52    0.91
   4   2  11    0.75    0.19
   4   3 -17    5.76    0.23
   4   3 -16   10.17    0.40
   4   3 -15    0.06    0.08
   4   3 -14    2.80    0.17
   4   3 -13    3.82    0.10
   4   3 -12   12.02    0.34
   4   3 -11    2.59    0.24
   4   3 -10    8.71    0.11
   4   3  -9    0.02    0.09
   4   3  -8   14.84    0.22
   4   3  -7   49.31    1.24
   4   3  -6    3.54    0.49
   4   3  -5    9.22    0.61
   4   3  -4   23.14    1.37
   4   3  -3  366.11   12.64
   4   3  -1   17.48    0.12
   4   3   0   19.53    1.36
   4   3   1   91.77    1.89
   4   3   2   14.15    0.07
   4   3   3   25.09    0.16
   4   3   4   21.22    0.14
   4   3   5   12.85    0.83
   4   3   6    4.54    0.20
   4   3   7    3.12    0.11
   4   3   8   18.25    0.72
   4   3   9   35.56    1.59
   4   3  10    1.97    0.24
   4   3  11   10.31    0.60
   4   3  12    1.48    0.23
   4   4 -17    1.90    0.12
   4   4 -16    0.85    0.12
   4   4 -15    1.61    0.12
   4   4 -14    2.51    0.19
   4   4 -13    0.96    0.10
   4   4 -12    1.88    0.07
   4   4 -11    3.54    0.09
   4   4 -10    3.17    0.09
   4   4  -9   66.75    2.17
   4   4  -8   47.08    1.25
   4   4  -7   15.83    0.31
   4   4  -6   26.27    0.73
   4   4  -3  137.24    3.34
   4   4  -2  106.64    3.67
   4   4  -1   27.06    1.22
   4   4   0    9.94    1.29
   4   4   1   55.05    1.22
   4   4   2   19.85    0.22
   4   4   3   84.70    2.05
   4   4   4    2.47    0.35
   4   4   5    1.58    0.11
   4   4   6    6.60    0.22
   4   4   7   30.78    0.73
   4   4   8    6.53    0.28
   4   4   9    1.75    0.18
   4   4  10    5.42    0.34
   4   4  11    5.22    0.29
   4   4  12    1.23    0.17
   4   5 -18    2.47    0.19
   4   5 -17    2.64    0.11
   4   5 -16    5.97    0.22
   4   5 -15    2.77    0.15
   4   5 -14    0.44    0.06
   4   5 -13    6.85    0.25
   4   5 -12    2.12    0.06
   4   5 -11   14.88    0.33
   4   5 -10   35.28    0.94
   4   5  -9   10.04    0.29
   4   5  -8   11.12    0.69
   4   5  -7    5.45    0.26
   4   5  -3   15.83    0.12
   4   5  -2    0.73    0.09
   4   5  -1   46.55    1.10
   4   5   0    4.82    0.05
   4   5   1   74.70    1.68
   4   5   2    0.95    0.47
   4   5   3    5.18    0.09
   4   5   4   31.79    0.63
   4   5   5    0.62    0.08
   4   5   6    0.01    0.07
   4   5   7   12.05    0.57
   4   5   8    8.27    0.51
   4   5   9    7.08    0.35
   4   5  10    1.51    0.25
   4   5  11    0.83    0.13
   4   6 -18    2.80    0.22
   4   6 -17   16.29    0.80
   4   6 -16    9.62    0.49
   4   6 -15    7.05    0.14
   4   6 -14    1.54    0.11
   4   6 -13    1.07    0.09
   4   6 -12    4.27    0.12
   4   6 -11    1.31    0.06
   4   6 -10    2.55    0.23
   4   6  -8    2.23    0.28
   4   6  -7    6.12    0.16
   4   6  -6   80.55    2.46
   4   6  -3    2.86    0.04
   4   6  -2   33.04    0.42
   4   6  -1   21.57    0.66
   4   6   0    4.93    0.22
   4   6   1    6.18    0.23
   4   6   2   62.00    1.81
   4   6   3    2.73    0.12
   4   6   4   13.40    0.28
   4   6   5   35.74    0.81
   4   6   6    1.07    0.11
   4   6   7    1.70    0.24
   4   6   8    4.78    0.31
   4   6   9    1.25    0.19
   4   6  10    0.41    0.15
   4   7 -18    2.39    0.14
   4   7 -17    0.52    0.08
   4   7 -16    1.41    0.18
   4   7 -15    8.70    0.26
   4   7 -14    3.26    0.13
   4   7 -13    1.89    0.08
   4   7 -12    7.34    0.12
   4   7 -11    1.38    0.07
   4   7 -10    0.12    0.20
   4   7  -9    0.39    0.33
   4   7  -8   15.80    0.78
   4   7  -7   51.73    3.20
   4   7  -6    8.17    0.37
   4   7  -3    0.20    0.07
   4   7  -2   19.97    1.07
   4   7  -1    2.45    0.25
   4   7   0   15.51    0.95
   4   7   1    4.86    0.25
   4   7   2   13.17    0.36
   4   7   3    3.17    0.18
   4   7   4   13.22    0.49
   4   7   5    5.96    0.33
   4   7   6    1.05    0.20
   4   7   7    9.10    0.40
   4   7   8    2.97    0.23
   4   7   9    2.78    0.23
   4   7  10    0.32    0.12
   4   8 -18    2.56    0.28
   4   8 -17    1.74    0.11
   4   8 -16    1.42    0.38
   4   8 -15    0.57    0.07
   4   8 -14   21.77    0.42
   4   8 -13    4.13    0.14
   4   8 -12    0.28    0.12
   4   8 -11   15.34    0.13
   4   8 -10    1.04    0.20
   4   8  -9    1.99    0.13
   4   8  -8    4.59    0.28
   4   8  -7   38.33    2.17
   4   8  -6   83.89    4.88
   4   8  -3    1.10    0.11
   4   8  -2   15.97    0.21
   4   8  -1    2.67    0.37
   4   8   0   50.82    0.30
   4   8   1    4.34    0.13
   4   8   2    0.26    0.10
   4   8   3    5.00    0.28
   4   8   4    0.65    0.08
   4   8   5    5.22    0.55
   4   8   6    8.47    0.52
   4   8   7    0.42    0.17
   4   8   8    0.22    0.15
   4   8   9    0.23    0.12
   4   9 -18    0.01    0.06
   4   9 -17    2.43    0.14
   4   9 -16    5.47    0.18
   4   9 -15    8.08    0.17
   4   9 -14    4.34    0.07
   4   9 -13   12.33    0.17
   4   9 -12   23.30    0.58
   4   9 -11   37.40    0.95
   4   9 -10   17.53    0.27
   4   9  -9    5.31    0.27
   4   9  -8   19.12    0.39
   4   9  -7   44.81    0.55
   4   9  -6    2.62    0.29
   4   9  -5   15.62    0.10
   4   9  -4    8.25    0.19
   4   9  -3   14.01    0.27
   4   9  -2    3.01    0.11
   4   9  -1   32.50    0.37
   4   9   0   33.94    1.27
   4   9   1    5.77    0.11
   4   9   2    5.43    0.17
   4   9   3    5.65    0.24
   4   9   4   11.54    0.50
   4   9   5    0.66    0.15
   4   9   6    0.88    0.27
   4   9   7    0.08    0.13
   4   9   8    3.05    0.22
   4  10 -18    3.47    0.16
   4  10 -17    2.49    0.33
   4  10 -16    4.29    0.08
   4  10 -15    1.02    0.05
   4  10 -14    8.89    0.13
   4  10 -13   25.02    0.32
   4  10 -12    4.89    0.14
   4  10 -11    2.04    0.16
   4  10 -10    2.38    0.15
   4  10  -9   24.68    0.39
   4  10  -8    6.56    0.05
   4  10  -7    6.49    0.14
   4  10  -6   15.52    0.24
   4  10  -5   13.59    0.60
   4  10  -4    5.71    0.10
   4  10  -3   11.59    0.09
   4  10  -2   23.19    0.67
   4  10  -1    3.57    0.21
   4  10   0    7.42    0.13
   4  10   1   10.86    0.45
   4  10   2    1.12    0.14
   4  10   3    0.27    0.16
   4  10   4    2.48    0.30
   4  10   5    5.87    0.33
   4  10   6    2.39    0.18
   4  10   7    0.67    0.14
   4  11 -18    2.08    0.19
   4  11 -17    1.38    0.10
   4  11 -16    0.42    0.06
   4  11 -15   11.18    0.30
   4  11 -14    4.68    0.11
   4  11 -13    0.36    0.05
   4  11 -12    9.31    0.32
   4  11 -11    3.76    0.12
   4  11 -10    1.69    0.12
   4  11  -9   19.79    0.41
   4  11  -8    0.71    0.09
   4  11  -7   19.94    0.38
   4  11  -6   13.06    0.07
   4  11  -5    5.95    0.36
   4  11  -4    4.73    0.09
   4  11  -3   12.96    0.14
   4  11  -2   14.34    0.34
   4  11  -1   23.75    0.91
   4  11   0    4.87    0.27
   4  11   1    8.05    0.46
   4  11   2    0.75    0.10
   4  11   3    4.19    0.12
   4  11   4    0.63    0.08
   4  11   5    1.01    0.16
   4  12 -18    0.42    0.07
   4  12 -17    0.53    0.13
   4  12 -16    1.90    0.08
   4  12 -15    7.55    0.16
   4  12 -14    0.62    0.08
   4  12 -13    2.33    0.18
   4  12 -12    2.36    0.11
   4  12 -11    6.62    0.08
   4  12 -10    1.46    0.12
   4  12  -9    7.41    0.15
   4  12  -8    4.70    0.09
   4  12  -7   37.20    0.37
   4  12  -6   12.29    0.31
   4  12  -5   12.33    0.16
   4  12  -4    0.06    0.05
   4  12  -3   10.15    0.21
   4  12  -2    7.16    0.14
   4  12  -1    1.79    0.07
   4  12   0    0.18    0.12
   4  12   1    0.27    0.08
   4  12   2    0.79    0.08
   4  12   3    1.26    0.15
   4  12   4    3.21    0.11
   4  13 -18    1.10    0.10
   4  13 -17    4.95    0.17
   4  13 -16    0.03    0.05
   4  13 -15    1.27    0.09
   4  13 -14    8.38    0.13
   4  13 -13    0.21    0.10
   4  13 -12    5.01    0.22
   4  13 -11    2.11    0.18
   4  13 -10   10.11    0.23
   4  13  -9    2.43    0.04
   4  13  -8   25.52    0.48
   4  13  -7    5.12    0.09
   4  13  -6   10.12    0.15
   4  13  -5    3.77    0.07
   4  13  -4    1.20    0.06
   4  13  -3    4.40    0.16
   4  13  -2    1.26    0.13
   4  13  -1    0.31    0.17
   4  13   0    1.06    0.11
   4  13   1    0.14    0.13
   4  13   2    1.20    0.13
   4  13   3    2.53    0.12
   4  14 -17    0.63    0.07
   4  14 -16    4.46    0.10
   4  14 -15    1.39    0.12
   4  14 -14    3.50    0.19
   4  14 -13    3.64    0.09
   4  14 -12    2.74    0.10
   4  14 -11    0.68    0.21
   4  14 -10    9.46    0.15
   4  14  -9    0.42    0.04
   4  14  -8    7.98    0.20
   4  14  -7    7.64    0.17
   4  14  -6    3.54    0.20
   4  14  -5    8.41    0.08
   4  14  -4    9.55    0.21
   4  14  -3    0.65    0.09
   4  14  -2    0.11    0.12
   4  14  -1    0.28    0.08
   4  14   0    0.97    0.18
   4  14   1    1.91    0.12
   4  15 -17    8.31    0.32
   4  15 -16   10.23    0.44
   4  15 -15    1.83    0.05
   4  15 -14    1.29    0.06
   4  15 -13    2.25    0.15
   4  15 -12    5.53    0.24
   4  15 -11    3.64    0.28
   4  15 -10    9.28    0.10
   4  15  -9    0.46    0.10
   4  15  -8    1.10    0.05
   4  15  -7    0.93    0.07
   4  15  -6   10.82    0.22
   4  15  -5    0.20    0.12
   4  15  -4    1.50    0.16
   4  15  -3    0.66    0.07
   4  15  -2    1.27    0.06
   4  15  -1    5.36    0.37
   4  16 -16    0.51    0.08
   4  16 -15    0.70    0.17
   4  16 -14    5.42    0.27
   4  16 -13    0.99    0.11
   4  16 -12    6.86    0.10
   4  16 -11    2.09    0.08
   4  16 -10    4.92    0.25
   4  16  -9    5.74    0.26
   4  16  -8    1.33    0.15
   4  16  -7    1.60    0.13
   4  16  -6    4.88    0.19
   4  16  -5    3.09    0.16
   4  16  -4    5.37    0.21
   4  16  -3    0.54    0.05
   4  16  -2    0.30    0.07
   4  17 -14    0.64    0.12
   4  17 -13    1.84    0.11
   4  17 -12    8.55    0.45
   4  17 -11    4.65    0.09
   4  17 -10    3.10    0.17
   4  17  -9   10.92    0.37
   4  17  -8    9.13    0.51
   4  17  -7    8.90    0.30
   4  17  -6    6.90    0.24
   4  17  -5    1.55    0.06
   4  17  -4    0.36    0.13
   4  18 -12    0.53    0.13
   4  18 -11   12.26    0.64
   4  18 -10    2.98    0.07
   4  18  -9    0.20    0.11
   4  18  -8    0.71    0.13
   5  -9   4    5.27    0.26
   5  -8 -10    6.38    0.28
   5  -8  -9    0.29    0.17
   5  -8  -8    1.01    0.14
   5  -8  -7    2.23    0.37
   5  -8  -6   13.91    0.54
   5  -8  -5    6.31    0.66
   5  -8  -4   33.05    0.91
   5  -8   3    1.53    0.22
   5  -8   4   21.83    1.24
   5  -8   5    7.75    0.21
   5  -8   6   12.01    0.48
   5  -7 -11    2.23    0.21
   5  -7 -10    2.71    0.24
   5  -7  -9    6.03    0.35
   5  -7  -8   30.96    0.81
   5  -7  -7    5.09    0.19
   5  -7  -6   30.73    0.86
   5  -7  -5   17.58    0.52
   5  -7  -4    1.84    0.21
   5  -7   2    4.46    0.47
   5  -7   3    4.24    0.38
   5  -7   4    7.27    0.18
   5  -7   5   58.03    2.42
   5  -7   6   19.40    0.33
   5  -7   7   24.78    1.22
   5  -7   8   26.06    0.48
   5  -7   9    4.38    0.20
   5  -6 -12    5.38    0.34
   5  -6 -11    2.99    0.18
   5  -6 -10    0.72    0.15
   5  -6  -9    7.41    0.42
   5  -6  -8    1.49    0.13
   5  -6  -7    1.22    0.08
   5  -6  -6    4.57    0.09
   5  -6  -5   27.48    0.64
   5  -6   1   42.94    1.14
   5  -6   2   17.28    0.30
   5  -6   3    1.89    0.27
   5  -6   4   28.84    1.07
   5  -6   5   37.02    1.82
   5  -6   6   49.60    2.56
   5  -6   7   29.48    0.82
   5  -6   8    3.08    0.51
   5  -6   9    0.20    0.41
   5  -6  10    3.60    0.18
   5  -6  11   37.80    1.50
   5  -5 -13    2.68    0.25
   5  -5 -12    1.40    0.15
   5  -5 -11    7.07    0.36
   5  -5 -10    3.53    0.19
   5  -5  -9    0.97    0.15
   5  -5  -8   20.64    0.66
   5  -5  -7    6.81    0.11
   5  -5  -6    1.00    0.16
   5  -5  -5   17.13    0.47
   5  -5  -4    6.26    0.71
   5  -5   1   47.29    3.40
   5  -5   2    0.72    0.60
   5  -5   3    1.61    0.99
   5  -5   4    2.84    0.14
   5  -5   5   24.04    1.08
   5  -5   6   28.15    0.87
   5  -5   7    3.49    0.27
   5  -5   8    0.18    0.31
   5  -5   9    4.06    0.84
   5  -5  10    2.01    0.39
   5  -5  11   20.88    0.73
   5  -4 -14    1.02    0.15
   5  -4 -13    1.03    0.12
   5  -4 -12    0.14    0.18
   5  -4 -11    5.61    0.32
   5  -4 -10    7.39    0.47
   5  -4  -9    8.19    0.45
   5  -4  -8    0.87    0.07
   5  -4  -7   40.54    0.87
   5  -4  -6    0.62    0.18
   5  -4  -5   13.49    0.75
   5  -4  -4    3.18    0.40
   5  -4  -3   13.52    1.60
   5  -4  -2    9.39    0.68
   5  -4  -1   51.60    1.76
   5  -4   0   27.50    0.83
   5  -4   1   20.41    1.15
   5  -4   2   12.29    1.71
   5  -4   3   17.88    2.68
   5  -4   4   91.77    1.33
   5  -4   5    9.90    0.89
   5  -4   6    3.37    0.28
   5  -4   7   13.33    0.63
   5  -4   8    4.57    0.58
   5  -4   9    1.25    0.22
   5  -4  10    4.75    0.50
   5  -4  11   16.01    1.02
   5  -3 -14    2.44    0.24
   5  -3 -13   11.93    0.67
   5  -3 -12    0.45    0.17
   5  -3 -11    0.06    0.19
   5  -3 -10   18.76    0.34
   5  -3  -9   64.99    1.61
   5  -3  -8   19.84    0.40
   5  -3  -7   30.45    0.84
   5  -3  -6   15.43    0.74
   5  -3  -5    4.75    0.22
   5  -3  -4   17.01    0.45
   5  -3  -3    2.56    1.54
   5  -3  -2   13.59    0.08
   5  -3  -1   15.39    0.34
   5  -3   0    0.46    0.19
   5  -3   1   59.92    1.35
   5  -3   2   19.77    1.13
   5  -3   3   19.54    2.33
   5  -3   4   60.14    4.09
   5  -3   5   64.23    1.20
   5  -3   6   10.03    0.41
   5  -3   7    6.32    0.28
   5  -3   8    3.29    0.09
   5  -3   9   12.18    0.91
   5  -3  10    1.23    0.32
   5  -3  11    7.34    0.51
   5  -2 -15   10.13    0.46
   5  -2 -14    1.62    0.20
   5  -2 -13    2.29    0.79
   5  -2 -12    0.49    0.24
   5  -2 -11   12.09    0.24
   5  -2 -10   12.61    0.49
   5  -2  -9   37.77    0.46
   5  -2  -8    8.38    0.50
   5  -2  -7   11.74    0.12
   5  -2  -6   28.71    0.62
   5  -2  -5    4.55    0.32
   5  -2  -4   37.58    0.92
   5  -2  -3  100.82    5.98
   5  -2  -2   14.11    0.29
   5  -2  -1   44.19    0.16
   5  -2   0   18.42    0.16
   5  -2   1    9.87    0.89
   5  -2   2   12.17    0.29
   5  -2   3   29.11    1.38
   5  -2   4   13.22    0.88
   5  -2   5   11.25    1.34
   5  -2   6   27.17    0.75
   5  -2   7   12.71    1.19
   5  -2   8    0.28    0.16
   5  -2   9   12.63    0.60
   5  -2  10    2.80    0.24
   5  -2  11   33.51    1.30
   5  -1 -15    4.56    0.29
   5  -1 -14    6.51    0.31
   5  -1 -13    0.09    0.20
   5  -1 -12    5.55    0.26
   5  -1 -11   10.27    0.46
   5  -1 -10    5.65    0.20
   5  -1  -9    2.63    0.11
   5  -1  -8   27.55    0.53
   5  -1  -7    2.31    0.20
   5  -1  -6   61.93    1.89
   5  -1  -5   40.22    1.52
   5  -1  -4   10.11    0.71
   5  -1  -3   24.94    0.08
   5  -1  -2   53.67    2.13
   5  -1  -1    2.19    0.52
   5  -1   0   19.74    0.08
   5  -1   1   20.44    1.01
   5  -1   2   30.95    2.17
   5  -1   3   80.91    1.30
   5  -1   4   26.59    0.31
   5  -1   5   77.29    1.25
   5  -1   6   25.23    0.34
   5  -1   7   44.32    1.59
   5  -1   8    7.06    0.68
   5  -1   9   28.56    0.62
   5  -1  10    1.08    0.24
   5   0 -16    0.10    0.14
   5   0 -15    1.27    0.14
   5   0 -14    4.13    0.16
   5   0 -13    0.41    0.11
   5   0 -12    1.91    0.13
   5   0 -11   13.75    0.22
   5   0 -10    1.24    0.13
   5   0  -9    1.00    0.07
   5   0  -8   74.21    2.73
   5   0  -7    5.86    0.15
   5   0  -5   10.20    0.75
   5   0  -4   89.64    4.47
   5   0  -3   64.07    1.75
   5   0  -2   22.23    0.33
   5   0  -1    7.60    0.04
   5   0   0   18.08    0.19
   5   0   1   58.12    0.30
   5   0   2   24.51    0.40
   5   0   3   18.51    0.23
   5   0   4    7.54    0.21
   5   0   5   49.12    0.88
   5   0   6   80.53    1.73
   5   0   7   11.43    0.39
   5   0   8   12.77    0.78
   5   0   9   12.41    0.43
   5   0  10   12.69    0.38
   5   1 -16    3.07    0.18
   5   1 -15    0.09    0.10
   5   1 -14    6.73    0.28
   5   1 -13   10.84    0.26
   5   1 -12    1.95    0.19
   5   1 -11    4.57    0.13
   5   1 -10   46.80    0.84
   5   1  -9    0.87    0.18
   5   1  -8   54.88    1.60
   5   1  -7    0.57    0.18
   5   1  -5   43.00    1.34
   5   1  -4   71.66    1.39
   5   1  -3    2.54    0.12
   5   1  -2    8.36    0.22
   5   1  -1    5.99    0.13
   5   1   0   16.29    0.19
   5   1   1   87.61    1.65
   5   1   2    8.55    0.10
   5   1   3    0.57    0.07
   5   1   4   44.65    0.81
   5   1   5    6.64    0.09
   5   1   6    1.93    0.17
   5   1   7   51.35    0.82
   5   1   8    7.13    0.30
   5   1   9    7.52    0.32
   5   1  10    9.98    0.56
   5   1  11    0.23    0.20
   5   2 -17    0.44    0.07
   5   2 -16    5.59    0.34
   5   2 -15    0.17    0.09
   5   2 -14    1.73    0.19
   5   2 -13    3.96    0.24
   5   2 -12   71.62    1.15
   5   2 -11   12.43    0.22
   5   2 -10   18.65    0.41
   5   2  -9    0.31    0.13
   5   2  -8    7.41    0.57
   5   2  -7   13.48    0.13
   5   2  -5    0.31    0.15
   5   2  -4    3.16    0.19
   5   2  -3   10.71    0.51
   5   2  -2   12.87    0.37
   5   2  -1   10.90    0.13
   5   2   0    4.03    0.85
   5   2   1   39.93    0.73
   5   2   2   15.45    0.64
   5   2   3    9.03    0.26
   5   2   4   57.54    1.03
   5   2   5    6.15    0.19
   5   2   6    0.26    0.14
   5   2   7    5.81    0.26
   5   2   8   32.18    0.46
   5   2   9    8.82    0.28
   5   2  10    3.35    0.31
   5   2  11    0.05    0.18
   5   2  12    7.58    0.35
   5   3 -17    4.82    0.22
   5   3 -16    1.27    0.11
   5   3 -15    5.96    0.18
   5   3 -14    2.16    0.23
   5   3 -13   13.66    0.43
   5   3 -12   12.31    0.50
   5   3 -11    0.58    0.07
   5   3 -10   17.29    0.65
   5   3  -9   31.49    1.17
   5   3  -8    2.09    0.43
   5   3  -7   16.19    0.48
   5   3  -6   22.19    0.46
   5   3  -5   12.82    0.47
   5   3  -4    8.41    0.65
   5   3  -3   10.31    0.44
   5   3  -2    7.40    0.26
   5   3  -1   36.32    1.85
   5   3   0   10.90    1.06
   5   3   1    1.82    0.13
   5   3   2   93.80    1.06
   5   3   3   26.15    0.34
   5   3   4   22.28    0.62
   5   3   5   10.45    0.14
   5   3   6   20.11    0.47
   5   3   7    1.16    0.11
   5   3   8   40.03    1.30
   5   3   9    0.18    0.17
   5   3  10    8.26    0.44
   5   3  11    5.92    0.33
   5   3  12    1.06    0.21
   5   4 -17    2.16    0.14
   5   4 -16    0.61    0.15
   5   4 -15    2.87    0.15
   5   4 -14    2.21    0.09
   5   4 -13    0.08    0.13
   5   4 -12   10.59    0.11
   5   4 -11    5.69    0.16
   5   4 -10    4.51    0.21
   5   4  -9   36.09    1.66
   5   4  -8   80.26    2.58
   5   4  -7   13.47    1.53
   5   4  -6    8.04    0.53
   5   4  -4   10.04    0.12
   5   4  -3    6.12    0.13
   5   4  -1   13.27    0.97
   5   4   0   65.53    1.72
   5   4   1   15.03    0.56
   5   4   2  113.22    3.81
   5   4   3   18.79    0.18
   5   4   4    0.60    0.06
   5   4   5    2.72    0.14
   5   4   6   22.43    0.52
   5   4   7    3.20    0.19
   5   4   8   21.56    0.70
   5   4   9    4.07    0.45
   5   4  10    1.78    0.24
   5   4  11    0.21    0.15
   5   5 -18    0.77    0.09
   5   5 -17    1.79    0.22
   5   5 -16    2.33    0.27
   5   5 -15    0.93    0.08
   5   5 -14    1.11    0.07
   5   5 -13   12.75    0.24
   5   5 -12    1.35    0.14
   5   5 -11   26.20    0.24
   5   5 -10   12.39    0.21
   5   5  -9    2.25    0.49
   5   5  -8   21.68    0.53
   5   5  -7   96.61    5.39
   5   5  -6   50.08    2.23
   5   5  -3   28.57    1.57
   5   5  -2   42.31    2.46
   5   5  -1   10.17    0.33
   5   5   0   86.62    2.37
   5   5   1    9.82    0.22
   5   5   2   10.31    0.46
   5   5   3   53.59    1.75
   5   5   4   24.61    0.50
   5   5   5    1.45    0.14
   5   5   6    1.55    0.16
   5   5   7   15.85    0.67
   5   5   8    7.47    0.47
   5   5   9    0.98    0.18
   5   5  10    1.73    0.23
   5   5  11    0.98    0.17
   5   6 -18    3.18    0.18
   5   6 -17    0.12    0.09
   5   6 -16    0.08    0.08
   5   6 -15    5.56    0.14
   5   6 -14    0.43    0.13
   5   6 -13   57.32    0.79
   5   6 -12    8.40    0.28
   5   6 -11    8.27    0.24
   5   6 -10    2.01    0.09
   5   6  -9   29.81    1.25
   5   6  -8   34.59    2.65
   5   6  -7   35.32    0.85
   5   6  -6    5.80    0.37
   5   6  -3   27.00    1.24
   5   6  -2   10.88    0.30
   5   6  -1   14.08    0.21
   5   6   0   29.58    0.64
   5   6   1  110.17    4.19
   5   6   2   13.41    0.17
   5   6   3    0.30    0.13
   5   6   4   36.83    1.13
   5   6   5    3.40    0.22
   5   6   6    2.96    0.20
   5   6   7    5.53    0.32
   5   6   8    3.80    0.25
   5   6   9    3.67    0.35
   5   6  10    0.03    0.11
   5   7 -18    3.00    0.19
   5   7 -17    2.92    0.12
   5   7 -16    4.49    0.17
   5   7 -15    9.58    0.28
   5   7 -14   33.11    0.67
   5   7 -13   22.50    0.37
   5   7 -12    1.07    0.11
   5   7 -11    3.24    0.07
   5   7 -10    2.71    0.13
   5   7  -9   28.86    0.33
   5   7  -8    4.46    0.37
   5   7  -7   13.73    0.53
   5   7  -6    3.65    0.19
   5   7  -3   18.07    0.87
   5   7  -2   31.27    1.68
   5   7  -1    8.33    0.14
   5   7   0    2.50    0.13
   5   7   1    4.60    0.12
   5   7   2    4.54    0.15
   5   7   3   50.04    1.10
   5   7   4   15.58    0.31
   5   7   5    5.97    0.43
   5   7   6    2.61    0.18
   5   7   7   14.74    0.85
   5   7   8    2.34    0.23
   5   7   9    0.70    0.15
   5   8 -18    0.06    0.07
   5   8 -17    3.01    0.11
   5   8 -16    8.06    0.22
   5   8 -15    0.02    0.07
   5   8 -14   15.88    0.19
   5   8 -13   46.21    0.60
   5   8 -12   20.08    0.19
   5   8 -11    1.11    0.04
   5   8 -10    0.02    0.04
   5   8  -9    3.18    0.07
   5   8  -8    1.74    0.22
   5   8  -7    0.32    0.13
   5   8  -6   21.76    0.47
   5   8  -5    3.71    0.47
   5   8  -4   20.37    0.98
   5   8  -3    4.12    0.08
   5   8  -2    3.72    0.18
   5   8  -1   28.91    0.55
   5   8   0    2.80    0.18
   5   8   1    0.76    0.26
   5   8   2    3.40    0.19
   5   8   3   53.18    1.01
   5   8   4    2.22    0.14
   5   8   5   14.99    0.70
   5   8   6    1.93    0.31
   5   8   7    1.93    0.26
   5   8   8    9.06    0.47
   5   9 -18    2.02    0.16
   5   9 -17    0.33    0.07
   5   9 -16    0.22    0.12
   5   9 -15    1.41    0.09
   5   9 -14    4.16    0.06
   5   9 -13   13.30    0.23
   5   9 -12    8.40    0.09
   5   9 -11   10.02    0.35
   5   9 -10    1.57    0.13
   5   9  -9    0.42    0.06
   5   9  -8   16.40    0.60
   5   9  -7    8.16    0.35
   5   9  -6    0.96    0.07
   5   9  -5    1.64    0.06
   5   9  -4   13.83    0.40
   5   9  -3   31.23    0.53
   5   9  -2   11.53    0.12
   5   9  -1   36.13    0.49
   5   9   0   15.15    0.16
   5   9   1    0.48    0.16
   5   9   2    2.60    0.22
   5   9   3    3.45    0.15
   5   9   4    1.09    0.14
   5   9   5    4.74    0.25
   5   9   6    4.97    0.27
   5   9   7    0.64    0.12
   5  10 -18    0.62    0.16
   5  10 -17    5.18    0.11
   5  10 -16    1.52    0.09
   5  10 -15    3.56    0.12
   5  10 -14   21.48    0.54
   5  10 -13   12.18    0.23
   5  10 -12    8.45    0.34
   5  10 -11    1.54    0.08
   5  10 -10   22.20    0.30
   5  10  -9   21.09    0.35
   5  10  -8    7.63    0.13
   5  10  -7    6.33    0.09
   5  10  -6   11.69    0.18
   5  10  -5    4.56    0.05
   5  10  -4    1.83    0.12
   5  10  -3   26.41    0.24
   5  10  -2    1.68    0.06
   5  10  -1    2.30    0.09
   5  10   0   20.81    0.54
   5  10   1    0.23    0.12
   5  10   2    1.48    0.11
   5  10   3    5.00    0.25
   5  10   4    2.58    0.16
   5  10   5    2.29    0.17
   5  10   6    0.21    0.15
   5  11 -18    4.04    0.18
   5  11 -17    0.41    0.06
   5  11 -16   13.64    0.28
   5  11 -15    9.55    0.25
   5  11 -14    1.61    0.09
   5  11 -13    4.25    0.10
   5  11 -12   41.57    0.83
   5  11 -11   29.62    0.40
   5  11 -10    0.48    0.10
   5  11  -9   18.46    0.36
   5  11  -8   18.11    0.45
   5  11  -7    4.65    0.03
   5  11  -6   11.66    0.18
   5  11  -5    7.41    0.16
   5  11  -4   10.09    0.18
   5  11  -3    2.81    0.11
   5  11  -2   31.33    0.48
   5  11  -1   10.78    0.15
   5  11   0    0.68    0.11
   5  11   1    6.59    0.25
   5  11   2    3.04    0.22
   5  11   3    8.97    0.26
   5  11   4    3.62    0.11
   5  11   5    0.41    0.16
   5  12 -18    1.14    0.08
   5  12 -17    9.99    0.31
   5  12 -16    5.54    0.19
   5  12 -15    1.13    0.08
   5  12 -14    3.21    0.13
   5  12 -13   12.62    0.60
   5  12 -12    7.81    0.14
   5  12 -11    4.11    0.13
   5  12 -10    3.81    0.16
   5  12  -9   16.52    0.26
   5  12  -8    1.08    0.09
   5  12  -7   22.09    0.13
   5  12  -6    8.63    0.09
   5  12  -5   23.66    0.28
   5  12  -4    8.91    0.14
   5  12  -3    9.50    0.26
   5  12  -2    0.50    0.08
   5  12  -1    4.26    0.24
   5  12   0    3.58    0.19
   5  12   1    2.87    0.15
   5  12   2    1.92    0.11
   5  12   3    1.46    0.13
   5  12   4    7.47    0.36
   5  13 -17    1.63    0.15
   5  13 -16    2.54    0.11
   5  13 -15    0.71    0.13
   5  13 -14    3.68    0.08
   5  13 -13    0.26    0.14
   5  13 -12    3.19    0.09
   5  13 -11    0.56    0.08
   5  13 -10    0.97    0.09
   5  13  -9    6.93    0.29
   5  13  -8    9.37    0.12
   5  13  -7    8.36    0.30
   5  13  -6   13.75    0.30
   5  13  -5    4.08    0.14
   5  13  -4   17.32    0.23
   5  13  -3    0.97    0.09
   5  13  -2    4.99    0.17
   5  13  -1    1.83    0.07
   5  13   0    0.46    0.13
   5  13   1    0.05    0.12
   5  13   2    5.65    0.28
   5  14 -17    0.23    0.11
   5  14 -16    2.29    0.20
   5  14 -15    0.35    0.06
   5  14 -14    1.44    0.12
   5  14 -13    2.89    0.34
   5  14 -12    0.08    0.14
   5  14 -11    3.35    0.14
   5  14 -10    3.24    0.08
   5  14  -9    2.40    0.17
   5  14  -8    9.28    0.18
   5  14  -7    7.77    0.27
   5  14  -6    7.59    0.19
   5  14  -5    5.15    0.09
   5  14  -4    4.00    0.17
   5  14  -3    4.87    0.27
   5  14  -2    0.92    0.06
   5  14  -1    6.51    0.23
   5  14   0    1.41    0.15
   5  14   1    0.22    0.10
   5  15 -17    2.07    0.17
   5  15 -16    0.34    0.11
   5  15 -15    0.46    0.11
   5  15 -14    0.08    0.13
   5  15 -13    0.21    0.11
   5  15 -12    4.64    0.39
   5  15 -11    2.11    0.29
   5  15 -10    1.07    0.10
   5  15  -9    6.26    0.26
   5  15  -8    0.58    0.11
   5  15  -7    0.35    0.06
   5  15  -6   10.71    0.24
   5  15  -5    2.90    0.10
   5  15  -4    3.53    0.18
   5  15  -3    3.21    0.21
   5  15  -2    0.91    0.10
   5  15  -1    5.11    0.25
   5  16 -16    4.99    0.29
   5  16 -15    3.05    0.22
   5  16 -14    1.34    0.23
   5  16 -13    5.16    0.19
   5  16 -12    1.64    0.15
   5  16 -11    0.11    0.11
   5  16 -10    0.91    0.05
   5  16  -9    4.80    0.20
   5  16  -8    0.59    0.21
   5  16  -7    1.09    0.12
   5  16  -6    0.83    0.08
   5  16  -5    0.39    0.05
   5  16  -4    0.61    0.06
   5  16  -3    1.84    0.06
   5  17 -14    1.47    0.13
   5  17 -13    2.76    0.14
   5  17 -12    4.11    0.18
   5  17 -11    3.45    0.28
   5  17 -10    3.89    0.11
   5  17  -9    4.46    0.16
   5  17  -8    1.02    0.07
   5  17  -7    0.31    0.06
   5  17  -6    0.73    0.16
   5  17  -5    0.26    0.12
   6  -9   4    3.31    0.20
   6  -9   5    4.46    0.34
   6  -9   6   89.22    2.17
   6  -8 -10    5.94    0.38
   6  -8  -9    0.45    0.16
   6  -8  -8   12.31    0.53
   6  -8  -7   29.31    0.97
   6  -8  -6    9.22    0.57
   6  -8  -5   16.14    0.64
   6  -8   3    6.64    0.42
   6  -8   4   15.30    0.81
   6  -8   5   50.56    2.84
   6  -8   6   38.39    2.63
   6  -8   7   24.60    1.33
   6  -8   8    5.30    0.32
   6  -7 -11    1.16    0.19
   6  -7 -10    4.67    0.33
   6  -7  -8    6.06    0.26
   6  -7  -7   15.77    1.46
   6  -7  -6    7.78    0.32
   6  -7  -5    9.12    0.21
   6  -7  -4    1.67    0.09
   6  -7   2   22.20    1.42
   6  -7   3   14.85    0.83
   6  -7   4   23.57    1.16
   6  -7   5   42.00    1.01
   6  -7   6   31.37    3.42
   6  -7   7   23.60    1.04
   6  -7   8    0.50    0.15
   6  -7   9    4.72    0.52
   6  -7  10    0.53    0.35
   6  -6 -12    1.86    0.18
   6  -6 -11    2.57    0.28
   6  -6 -10    2.62    0.38
   6  -6  -9    0.93    0.14
   6  -6  -8   62.26    2.02
   6  -6  -7   17.90    0.62
   6  -6  -6    0.40    0.10
   6  -6  -5    3.02    0.27
   6  -6   1   18.95    1.84
   6  -6   2   13.41    0.33
   6  -6   3   16.60    0.92
   6  -6   4   27.29    1.20
   6  -6   5   11.52    0.54
   6  -6   6    4.05    0.68
   6  -6   7   12.10    0.13
   6  -6   8    4.03    0.39
   6  -6   9    0.13    0.21
   6  -6  10    5.82    0.34
   6  -6  11   16.30    0.43
   6  -5 -13    0.37    0.12
   6  -5 -12    0.83    0.16
   6  -5 -11    2.24    0.23
   6  -5 -10   15.85    0.52
   6  -5  -9    6.80    0.33
   6  -5  -8    3.02    0.15
   6  -5  -7    0.45    0.10
   6  -5  -6   12.38    0.53
   6  -5  -5    0.07    0.22
   6  -5  -4    5.25    0.42
   6  -5  -3    2.24    0.17
   6  -5  -2   39.69    1.10
   6  -5  -1   56.06    1.31
   6  -5   1  148.77    8.14
   6  -5   2    1.24    1.27
   6  -5   3   32.41    1.34
   6  -5   4    4.82    0.23
   6  -5   5   30.26    0.35
   6  -5   6   31.93    1.51
   6  -5   7    0.50    0.41
   6  -5   8    1.59    0.17
   6  -5   9    8.88    0.59
   6  -5  10   61.52    2.91
   6  -5  11   11.57    0.70
   6  -4 -14    0.17    0.11
   6  -4 -13    9.47    0.48
   6  -4 -12    3.42    0.17
   6  -4 -11    8.49    0.25
   6  -4 -10    8.16    0.38
   6  -4  -9    6.68    0.25
   6  -4  -8   15.06    0.37
   6  -4  -7   10.98    0.41
   6  -4  -6    5.93    0.07
   6  -4  -5   16.55    1.04
   6  -4  -4    1.37    0.11
   6  -4  -3   21.94    0.36
   6  -4  -2   16.11    0.23
   6  -4  -1   12.75    0.30
   6  -4   0   10.54    0.64
   6  -4   1   16.84    0.67
   6  -4   2    3.96    0.82
   6  -4   3   30.56    2.68
   6  -4   4   37.46    1.72
   6  -4   5   17.79    2.00
   6  -4   6    1.13    0.23
   6  -4   7    0.23    0.12
   6  -4   8    5.26    0.19
   6  -4   9   50.69    1.66
   6  -4  10   12.82    0.37
   6  -4  11   23.15    1.67
   6  -3 -14    1.58    0.19
   6  -3 -13    4.34    0.28
   6  -3 -12    1.60    0.39
   6  -3 -11    1.41    0.28
   6  -3 -10   17.24    0.52
   6  -3  -9    5.52    0.54
   6  -3  -8    8.75    0.21
   6  -3  -7   19.42    0.55
   6  -3  -6    5.46    0.26
   6  -3  -5    1.48    0.12
   6  -3  -4   51.78    2.17
   6  -3  -3   14.65    0.27
   6  -3  -2   41.41    1.75
   6  -3  -1   11.01    0.85
   6  -3   0   59.72    0.87
   6  -3   1   30.02    1.18
   6  -3   2   86.30    1.49
   6  -3   3    3.53    0.39
   6  -3   4   30.36    0.47
   6  -3   5   14.05    1.41
   6  -3   6   18.03    1.00
   6  -3   7    0.42    0.30
   6  -3   8    1.20    0.22
   6  -3   9    3.40    0.35
   6  -3  10   20.88    0.83
   6  -2 -15    4.40    0.29
   6  -2 -14   10.83    0.43
   6  -2 -13    2.37    0.22
   6  -2 -12    0.77    0.14
   6  -2 -11   30.12    1.64
   6  -2 -10    4.20    0.21
   6  -2  -9    2.83    0.22
   6  -2  -8   18.07    0.31
   6  -2  -7    0.03    0.15
   6  -2  -6    6.56    0.19
   6  -2  -5   10.31    0.40
   6  -2  -4  385.07    5.59
   6  -2  -3   10.41    0.28
   6  -2  -2    0.03    0.91
   6  -2  -1   37.82    3.20
   6  -2   0  124.44    3.55
   6  -2   1    2.00    0.14
   6  -2   2   29.28    0.66
   6  -2   3   97.62    2.10
   6  -2   4   39.99    0.81
   6  -2   5    3.83    0.26
   6  -2   6    4.01    0.30
   6  -2   7    1.85    0.11
   6  -2   8   13.71    0.28
   6  -2   9    3.12    0.32
   6  -2  10   30.36    1.47
   6  -1 -15    0.70    0.14
   6  -1 -14    5.89    0.37
   6  -1 -13    0.13    0.19
   6  -1 -12    1.01    0.17
   6  -1 -11   18.07    0.41
   6  -1 -10   20.29    0.25
   6  -1  -9    1.25    0.25
   6  -1  -8    6.61    0.54
   6  -1  -7    4.21    0.19
   6  -1  -6   25.06    0.61
   6  -1  -5   29.47    0.69
   6  -1  -4   41.41    1.43
   6  -1  -3  291.57    6.42
   6  -1  -2   70.21    0.24
   6  -1  -1    1.00    0.54
   6  -1   0   35.23    0.60
   6  -1   1  111.93    2.69
   6  -1   2   51.33    0.83
   6  -1   3   17.77    0.26
   6  -1   4    2.49    0.10
   6  -1   5   49.76    1.85
   6  -1   6   43.54    1.34
   6  -1   7   11.56    1.70
   6  -1   8    9.58    0.43
   6  -1   9   78.26    1.77
   6  -1  10    3.98    0.35
   6   0 -16    1.65    0.23
   6   0 -15    2.16    0.14
   6   0 -14    1.49    0.18
   6   0 -13    7.63    0.28
   6   0 -12    6.19    0.16
   6   0 -11    5.00    0.17
   6   0 -10   11.08    0.55
   6   0  -9    6.00    0.08
   6   0  -8   10.37    0.46
   6   0  -7   15.46    0.48
   6   0  -6   15.24    0.64
   6   0  -5   37.33    1.28
   6   0  -4   56.11    4.45
   6   0  -3   63.62    2.68
   6   0  -2   75.95    2.50
   6   0  -1    8.57    0.10
   6   0   0   35.58    0.16
   6   0   1   39.67    0.44
   6   0   2   52.17    0.49
   6   0   3    8.28    0.30
   6   0   4   11.25    0.55
   6   0   5   11.11    0.25
   6   0   6   15.78    0.15
   6   0   7   52.47    1.07
   6   0   8    8.23    0.25
   6   0   9    4.62    0.14
   6   0  10    0.81    0.21
   6   0  11    0.54    0.32
   6   1 -16    0.45    0.11
   6   1 -15    0.82    0.15
   6   1 -14    0.42    0.09
   6   1 -13    0.82    0.14
   6   1 -12   13.67    0.22
   6   1 -11   52.85    1.05
   6   1 -10   20.24    0.75
   6   1  -9    4.64    0.59
   6   1  -8  149.27    3.70
   6   1  -7   41.75    1.85
   6   1  -6   19.85    0.64
   6   1  -5  106.35    3.87
   6   1  -4  101.69    4.41
   6   1  -3  111.40    0.40
   6   1  -2    9.65    0.51
   6   1  -1  155.46    2.31
   6   1   0   11.01    0.77
   6   1   1  257.64    3.54
   6   1   2    6.83    0.35
   6   1   3    1.91    0.50
   6   1   4    0.18    0.15
   6   1   5   17.30    0.75
   6   1   6   21.66    1.08
   6   1   7    4.00    0.08
   6   1   8    2.92    0.16
   6   1   9   28.71    0.66
   6   1  10    7.58    0.30
   6   1  11    1.30    0.37
   6   2 -17    3.70    0.16
   6   2 -16    0.05    0.10
   6   2 -15    0.05    0.14
   6   2 -14    0.43    0.11
   6   2 -13    2.42    0.21
   6   2 -12   20.05    0.36
   6   2 -11    8.92    0.22
   6   2 -10    2.55    0.19
   6   2  -9    7.18    0.08
   6   2  -8   16.94    1.11
   6   2  -7   45.02    0.43
   6   2  -6    5.73    0.42
   6   2  -5  147.68    4.25
   6   2  -4   70.78    1.88
   6   2  -3  104.51    7.54
   6   2  -2   57.09    0.91
   6   2  -1   82.07    2.81
   6   2   0   26.22    2.29
   6   2   1  130.89    3.25
   6   2   2  254.94    3.87
   6   2   3    3.02    0.47
   6   2   4    0.35    0.09
   6   2   5    3.16    0.12
   6   2   6   15.81    0.67
   6   2   7   24.54    0.70
   6   2   8    2.92    0.19
   6   2   9    2.16    0.38
   6   2  10    7.04    0.54
   6   2  11    5.19    0.24
   6   2  12    7.24    0.41
   6   3 -17    1.52    0.09
   6   3 -16    0.39    0.07
   6   3 -15    0.75    0.24
   6   3 -14    0.67    0.12
   6   3 -13    1.99    0.07
   6   3 -12    9.85    0.14
   6   3 -11    2.35    0.09
   6   3 -10    4.80    0.08
   6   3  -9   32.97    1.58
   6   3  -8    4.33    0.34
   6   3  -7  122.04    8.30
   6   3  -6  128.29    1.92
   6   3  -5   54.12    2.47
   6   3  -4   16.90    0.09
   6   3  -3   64.10    1.43
   6   3  -2   38.65    1.79
   6   3   0   45.25    2.87
   6   3   1    3.60    0.70
   6   3   2   45.16    2.12
   6   3   3   11.11    0.23
   6   3   4    4.71    0.26
   6   3   5    8.59    0.14
   6   3   6   22.43    0.25
   6   3   7    8.33    0.34
   6   3   8   16.87    0.58
   6   3   9   18.74    0.84
   6   3  10    5.28    0.57
   6   3  11    8.19    0.37
   6   4 -17    0.28    0.11
   6   4 -16    0.10    0.08
   6   4 -15    1.30    0.23
   6   4 -14    7.61    0.25
   6   4 -13   16.67    0.65
   6   4 -12   16.02    0.16
   6   4 -11    7.25    0.26
   6   4 -10    0.00    0.10
   6   4  -9   95.47    1.04
   6   4  -8    7.05    0.26
   6   4  -7    5.85    0.31
   6   4  -6   94.61    6.21
   6   4  -5    3.25    0.22
   6   4  -4   53.62    3.21
   6   4  -3  199.35    5.30
   6   4  -2   73.76    2.54
   6   4  -1   20.92    0.41
   6   4   0   59.27    1.12
   6   4   1    4.14    0.25
   6   4   2    3.03    0.63
   6   4   3   14.10    0.71
   6   4   4    2.44    0.09
   6   4   5    6.73    0.19
   6   4   6   12.71    0.44
   6   4   7    0.89    0.34
   6   4   8   11.22    0.77
   6   4   9    6.80    0.41
   6   4  10    1.55    0.22
   6   4  11    1.47    0.22
   6   5 -18    2.93    0.17
   6   5 -17    7.99    0.38
   6   5 -16    2.77    0.19
   6   5 -15    5.35    0.12
   6   5 -14    2.53    0.18
   6   5 -13   13.62    0.33
   6   5 -12   16.41    0.42
   6   5 -11    6.86    0.06
   6   5 -10    1.13    0.22
   6   5  -9   28.34    0.71
   6   5  -8  112.56    4.94
   6   5  -7   15.41    0.29
   6   5  -6   34.46    0.50
   6   5  -4  140.41    3.19
   6   5  -3  152.66    5.73
   6   5  -1    0.07    0.26
   6   5   0   74.74    2.76
   6   5   1    4.78    0.22
   6   5   2    3.14    0.33
   6   5   3    3.73    0.16
   6   5   4   29.80    1.01
   6   5   5    5.75    0.26
   6   5   6   21.81    0.57
   6   5   7    9.07    0.60
   6   5   8    1.91    0.20
   6   5   9    0.57    0.15
   6   5  10    0.52    0.13
   6   6 -18    6.71    0.27
   6   6 -17    4.55    0.19
   6   6 -16   19.16    0.42
   6   6 -15    1.98    0.09
   6   6 -14   33.14    0.49
   6   6 -13    4.23    0.17
   6   6 -12    4.63    0.10
   6   6 -11    8.80    0.33
   6   6 -10   31.33    0.14
   6   6  -9   19.69    0.37
   6   6  -8   42.58    1.01
   6   6  -7   93.45    4.82
   6   6  -6   78.78    2.64
   6   6  -3    6.25    0.08
   6   6  -2  121.08    4.36
   6   6  -1   82.31    1.34
   6   6   0   17.74    0.50
   6   6   1    6.56    0.29
   6   6   2   33.74    0.79
   6   6   3   21.21    0.20
   6   6   4    8.88    0.12
   6   6   5   32.42    1.51
   6   6   6   30.75    1.14
   6   6   7    4.56    0.36
   6   6   8    1.59    0.24
   6   6   9    1.19    0.19
   6   7 -18    0.02    0.05
   6   7 -17    0.06    0.08
   6   7 -16    2.44    0.08
   6   7 -15    4.25    0.13
   6   7 -14    4.46    0.06
   6   7 -13    0.49    0.06
   6   7 -12    6.89    0.18
   6   7 -11    1.41    0.14
   6   7 -10   42.00    0.89
   6   7  -9    8.08    0.37
   6   7  -8  116.60    2.88
   6   7  -7   41.40    1.29
   6   7  -6   19.81    0.88
   6   7  -3    6.48    0.40
   6   7  -2   19.02    0.20
   6   7  -1   69.63    1.83
   6   7   0   10.56    0.30
   6   7   1    2.15    0.13
   6   7   2    2.75    0.09
   6   7   3    4.28    0.23
   6   7   4    4.66    0.25
   6   7   5    9.57    0.35
   6   7   6    8.06    0.45
   6   7   7    0.14    0.17
   6   7   8    3.72    0.34
   6   7   9    0.14    0.10
   6   8 -18    2.07    0.11
   6   8 -17    3.62    0.13
   6   8 -16   15.49    0.39
   6   8 -15    1.32    0.08
   6   8 -14   10.80    0.27
   6   8 -13    0.39    0.10
   6   8 -12   53.07    0.63
   6   8 -11    6.92    0.16
   6   8 -10   28.83    0.18
   6   8  -9    3.63    0.13
   6   8  -8   12.86    0.41
   6   8  -7   75.54    1.20
   6   8  -6   16.66    0.38
   6   8  -5    9.98    0.27
   6   8  -4   70.12    1.68
   6   8  -3   87.22    1.38
   6   8  -2   15.60    0.18
   6   8  -1    3.90    0.11
   6   8   0   22.97    0.62
   6   8   1   23.52    0.67
   6   8   2   20.49    0.43
   6   8   3    5.48    0.38
   6   8   4    0.34    0.13
   6   8   5   13.04    0.53
   6   8   6    3.01    0.25
   6   8   7    4.63    0.33
   6   8   8    1.91    0.16
   6   9 -18    4.01    0.13
   6   9 -17    3.02    0.08
   6   9 -16    0.12    0.11
   6   9 -15    4.68    0.14
   6   9 -14   15.49    0.28
   6   9 -13   26.71    0.54
   6   9 -12   23.98    0.59
   6   9 -11    5.12    0.16
   6   9 -10    6.21    0.28
   6   9  -9   38.36    0.38
   6   9  -8    7.52    0.16
   6   9  -7   36.74    0.60
   6   9  -6   43.98    0.83
   6   9  -5   28.06    0.29
   6   9  -4   16.71    0.39
   6   9  -3   63.45    0.59
   6   9  -2    6.77    0.20
   6   9  -1   12.42    0.19
   6   9   0   35.71    0.48
   6   9   1    3.52    0.17
   6   9   2    5.75    0.32
   6   9   3    9.48    0.30
   6   9   4    0.42    0.16
   6   9   5    5.04    0.27
   6   9   6    2.33    0.18
   6   9   7    3.15    0.24
   6  10 -18    3.23    0.38
   6  10 -17    0.34    0.08
   6  10 -16    1.45    0.11
   6  10 -15    4.45    0.09
   6  10 -14    1.00    0.07
   6  10 -13    4.14    0.14
   6  10 -12    1.42    0.08
   6  10 -11   29.31    0.62
   6  10 -10    8.29    0.09
   6  10  -9   51.71    0.72
   6  10  -8   20.12    0.26
   6  10  -7    5.21    0.16
   6  10  -6    4.39    0.11
   6  10  -5   38.63    0.59
   6  10  -4    9.05    0.27
   6  10  -3    9.76    0.14
   6  10  -2    2.45    0.05
   6  10  -1    6.27    0.19
   6  10   0   10.66    0.29
   6  10   1    9.35    0.24
   6  10   2    1.17    0.14
   6  10   3    2.65    0.19
   6  10   4    3.42    0.16
   6  10   5    5.80    0.20
   6  10   6    2.67    0.21
   6  11 -18    4.34    0.17
   6  11 -17    3.67    0.15
   6  11 -16    2.78    0.21
   6  11 -15    1.25    0.08
   6  11 -14    0.08    0.08
   6  11 -13    3.95    0.20
   6  11 -12    1.15    0.14
   6  11 -11   60.78    0.90
   6  11 -10    2.85    0.22
   6  11  -9    3.50    0.19
   6  11  -8   46.54    0.88
   6  11  -7   21.24    0.12
   6  11  -6    0.27    0.03
   6  11  -5   21.12    0.23
   6  11  -4   20.49    0.27
   6  11  -3    0.51    0.08
   6  11  -2    1.26    0.15
   6  11  -1    8.36    0.22
   6  11   0    0.99    0.09
   6  11   1    2.78    0.19
   6  11   2    1.40    0.11
   6  11   3    6.53    0.30
   6  11   4    0.63    0.08
   6  12 -18    7.70    0.28
   6  12 -17    1.31    0.06
   6  12 -16    1.35    0.14
   6  12 -15    0.99    0.09
   6  12 -14    1.44    0.09
   6  12 -13    5.91    0.27
   6  12 -12    1.37    0.19
   6  12 -11   24.19    0.22
   6  12 -10    4.48    0.31
   6  12  -9    1.79    0.09
   6  12  -8   31.18    0.42
   6  12  -7   44.15    1.01
   6  12  -6    6.60    0.21
   6  12  -5   30.00    0.57
   6  12  -4   26.62    0.39
   6  12  -3    0.05    0.08
   6  12  -2    7.04    0.23
   6  12  -1    0.29    0.10
   6  12   0    1.25    0.12
   6  12   1    1.42    0.10
   6  12   2    2.22    0.13
   6  12   3    0.47    0.07
   6  13 -17    2.24    0.06
   6  13 -16    1.40    0.10
   6  13 -15    1.99    0.11
   6  13 -14    1.99    0.16
   6  13 -13    7.59    0.21
   6  13 -12    1.63    0.21
   6  13 -11    7.65    0.30
   6  13 -10   13.62    0.47
   6  13  -9   13.52    0.29
   6  13  -8    2.66    0.08
   6  13  -7   48.80    0.71
   6  13  -6   20.82    0.56
   6  13  -5   17.76    0.17
   6  13  -4    7.39    0.14
   6  13  -3    0.43    0.13
   6  13  -2    4.46    0.15
   6  13  -1    0.17    0.09
   6  13   0    2.33    0.08
   6  13   1    0.20    0.10
   6  13   2    0.15    0.09
   6  14 -16    2.09    0.12
   6  14 -15    1.23    0.22
   6  14 -14    0.24    0.11
   6  14 -13    0.91    0.13
   6  14 -12   20.47    0.50
   6  14 -11    5.25    0.47
   6  14 -10    0.04    0.12
   6  14  -9   13.95    0.31
   6  14  -8   15.78    0.46
   6  14  -7    4.17    0.11
   6  14  -6   12.32    0.13
   6  14  -5    1.67    0.14
   6  14  -4    3.26    0.10
   6  14  -3   11.00    0.23
   6  14  -2    0.20    0.10
   6  14  -1    5.39    0.18
   6  14   0    7.40    0.37
   6  15 -16    1.20    0.10
   6  15 -15    2.49    0.15
   6  15 -14    6.11    0.40
   6  15 -13    5.41    0.26
   6  15 -12    8.35    0.30
   6  15 -11    0.69    0.24
   6  15 -10    2.38    0.18
   6  15  -9    2.80    0.08
   6  15  -8    0.86    0.08
   6  15  -7    2.04    0.19
   6  15  -6    7.22    0.14
   6  15  -5    3.06    0.20
   6  15  -4    0.84    0.10
   6  15  -3   10.57    0.26
   6  15  -2    0.57    0.10
   6  16 -15    3.22    0.31
   6  16 -14    2.55    0.22
   6  16 -13    0.09    0.11
   6  16 -12    0.27    0.10
   6  16 -11    1.48    0.29
   6  16 -10   10.29    0.46
   6  16  -9    5.87    0.20
   6  16  -8    6.03    0.14
   6  16  -7    0.47    0.06
   6  16  -6    0.44    0.08
   6  16  -5    4.77    0.17
   6  16  -4   11.93    0.26
   6  17 -12    2.44    0.19
   6  17 -11    4.55    0.26
   6  17 -10    0.01    0.12
   6  17  -9    0.44    0.07
   6  17  -8    4.92    0.21
   6  17  -7    2.08    0.17
   7 -10   5    2.36    0.41
   7 -10   6    0.02    0.16
   7  -9  -9    2.07    0.18
   7  -9  -8    0.28    0.14
   7  -9  -7    1.34    0.21
   7  -9   4    1.44    0.61
   7  -9   5   12.11    0.65
   7  -9   6   10.91    0.46
   7  -9   7    4.14    0.29
   7  -9   8    6.71    0.58
   7  -8 -10    1.72    0.21
   7  -8  -9    2.05    0.29
   7  -8  -8    0.81    0.22
   7  -8  -7    1.93    0.26
   7  -8  -6    0.17    0.18
   7  -8  -5    5.62    0.53
   7  -8  -4    3.78    0.31
   7  -8   3    9.52    0.16
   7  -8   4   22.41    0.86
   7  -8   5    7.07    0.67
   7  -8   6   29.37    1.63
   7  -8   7    7.88    0.33
   7  -8   8   15.42    1.15
   7  -8   9   23.31    0.87
   7  -8  10   22.90    1.63
   7  -7 -11    2.49    0.22
   7  -7 -10    0.16    0.15
   7  -7  -9    7.73    0.59
   7  -7  -8    0.92    0.23
   7  -7  -7    1.51    0.22
   7  -7  -6   12.90    0.34
   7  -7  -5   14.64    0.47
   7  -7  -4   11.01    0.48
   7  -7  -3    9.27    0.17
   7  -7   2   10.70    0.30
   7  -7   3   12.76    0.89
   7  -7   4    6.66    0.78
   7  -7   5    5.17    0.24
   7  -7   6    0.92    0.23
   7  -7   7    3.71    0.42
   7  -7   8    0.37    0.32
   7  -7   9   23.23    1.15
   7  -7  10    3.34    0.40
   7  -6 -12    3.86    0.24
   7  -6 -11    0.18    0.14
   7  -6 -10    2.39    0.35
   7  -6  -9   15.37    0.55
   7  -6  -8   22.46    0.62
   7  -6  -7    3.82    0.26
   7  -6  -6    1.80    0.12
   7  -6  -5    2.92    0.15
   7  -6  -4   31.20    0.91
   7  -6   1  102.46    4.88
   7  -6   2    0.29    0.41
   7  -6   3    2.79    0.18
   7  -6   4   19.59    1.13
   7  -6   5   12.50    0.60
   7  -6   6   19.24    0.80
   7  -6   7    9.40    0.38
   7  -6   8    5.93    0.82
   7  -6   9    1.62    0.31
   7  -6  10   24.88    1.06
   7  -5 -13    0.19    0.13
   7  -5 -12    3.40    0.26
   7  -5 -11    7.15    0.56
   7  -5 -10    7.38    0.47
   7  -5  -9   12.22    0.49
   7  -5  -8    0.71    0.19
   7  -5  -7    8.40    0.27
   7  -5  -6    7.18    0.19
   7  -5  -5   11.92    0.18
   7  -5  -4   11.48    0.84
   7  -5  -3    1.71    0.24
   7  -5  -2   38.26    1.66
   7  -5  -1    0.46    0.19
   7  -5   0   17.59    0.28
   7  -5   1   51.49    1.01
   7  -5   2    7.50    1.20
   7  -5   3   64.93    2.17
   7  -5   4   54.36    1.27
   7  -5   5    9.43    0.39
   7  -5   6   57.93    2.00
   7  -5   7    7.27    0.44
   7  -5   8   30.12    0.86
   7  -5   9    6.84    0.33
   7  -5  10   37.38    1.38
   7  -4 -13    0.85    0.15
   7  -4 -12    1.32    0.24
   7  -4 -11    3.81    0.25
   7  -4 -10    7.81    0.38
   7  -4  -9   14.92    0.35
   7  -4  -8   10.12    0.35
   7  -4  -7    1.40    0.08
   7  -4  -6   26.97    0.41
   7  -4  -5   27.02    1.44
   7  -4  -4   26.68    1.28
   7  -4  -3   16.37    0.86
   7  -4  -2   21.30    1.05
   7  -4  -1   29.99    0.33
   7  -4   0    6.27    0.23
   7  -4   1   74.46    1.80
   7  -4   2   20.15    0.24
   7  -4   3    5.80    0.24
   7  -4   4    9.73    0.66
   7  -4   5   16.05    0.24
   7  -4   6    1.16    0.15
   7  -4   7   10.28    0.47
   7  -4   8   57.46    3.10
   7  -4   9   10.84    0.39
   7  -4  10   16.11    0.65
   7  -3 -14    3.14    0.26
   7  -3 -13    6.71    0.32
   7  -3 -12    6.40    0.28
   7  -3 -11    1.29    0.26
   7  -3 -10   35.45    0.94
   7  -3  -9    3.49    0.32
   7  -3  -8    0.06    0.13
   7  -3  -7    6.02    0.22
   7  -3  -6   35.85    0.41
   7  -3  -5   37.92    1.83
   7  -3  -4   13.23    0.08
   7  -3  -3    5.52    0.60
   7  -3  -2   33.35    1.91
   7  -3  -1   43.68    1.45
   7  -3   0   19.50    0.42
   7  -3   1   11.48    0.30
   7  -3   2   91.30    2.67
   7  -3   3   14.26    0.91
   7  -3   4   91.86    2.78
   7  -3   5   26.80    1.33
   7  -3   6   81.32    2.82
   7  -3   7   20.14    0.99
   7  -3   8    2.88    0.27
   7  -3   9    2.15    0.42
   7  -3  10    3.83    0.36
   7  -2 -15    2.84    0.24
   7  -2 -14    4.23    0.25
   7  -2 -13    1.03    0.28
   7  -2 -12    1.22    0.13
   7  -2 -11    1.15    0.31
   7  -2 -10   20.25    0.57
   7  -2  -9   18.00    0.38
   7  -2  -8    0.39    0.14
   7  -2  -7    9.33    0.53
   7  -2  -6   83.34    2.95
   7  -2  -5   32.14    1.22
   7  -2  -4    2.16    0.08
   7  -2  -3   16.43    0.24
   7  -2  -2   14.80    0.13
   7  -2  -1    8.02    0.58
   7  -2   0   66.57    0.64
   7  -2   1    7.20    0.20
   7  -2   2   18.92    0.40
   7  -2   3   28.70    1.72
   7  -2   4   27.65    0.44
   7  -2   5    2.79    0.36
   7  -2   6   23.55    0.81
   7  -2   7   59.65    1.68
   7  -2   8   17.22    0.31
   7  -2   9    2.55    0.37
   7  -1 -15    4.00    0.19
   7  -1 -14   10.97    0.72
   7  -1 -13    4.43    0.34
   7  -1 -12   12.87    0.70
   7  -1 -11    2.48    0.12
   7  -1 -10    0.92    0.09
   7  -1  -9    3.56    0.16
   7  -1  -8   17.33    0.31
   7  -1  -6    4.56    0.27
   7  -1  -5   12.71    0.76
   7  -1  -4   24.06    0.50
   7  -1  -3   21.98    1.11
   7  -1  -2    0.12    0.21
   7  -1  -1    6.95    0.29
   7  -1   0   25.18    0.13
   7  -1   1    8.52    0.15
   7  -1   2    4.65    0.07
   7  -1   3   32.10    0.35
   7  -1   4   47.28    1.29
   7  -1   5   17.37    0.35
   7  -1   6   28.50    0.78
   7  -1   7   84.89    1.75
   7  -1   8    9.40    0.29
   7  -1   9   13.25    1.75
   7  -1  10    7.13    0.39
   7   0 -16    0.57    0.13
   7   0 -15    1.90    0.15
   7   0 -14    7.46    0.23
   7   0 -13    0.54    0.19
   7   0 -12    0.18    0.15
   7   0 -11    4.82    0.33
   7   0 -10    6.85    0.27
   7   0  -9    2.29    0.34
   7   0  -8   69.71    1.47
   7   0  -6   38.34    1.23
   7   0  -5   14.80    0.31
   7   0  -4    1.69    0.57
   7   0  -3   29.30    2.77
   7   0  -2   11.63    0.94
   7   0  -1   18.03    0.18
   7   0   0   11.78    0.27
   7   0   1   46.86    1.42
   7   0   2   58.44    2.09
   7   0   3   12.17    0.75
   7   0   4   19.03    0.79
   7   0   5   20.82    0.62
   7   0   6   30.60    0.56
   7   0   7   46.59    1.07
   7   0   8   16.00    0.34
   7   0   9    4.41    0.34
   7   0  10    1.97    0.34
   7   0  11    3.68    0.25
   7   1 -16    2.79    0.12
   7   1 -15    0.38    0.15
   7   1 -14    7.68    0.22
   7   1 -13    6.31    0.20
   7   1 -12    5.12    0.34
   7   1 -11   32.59    0.68
   7   1 -10   10.06    0.24
   7   1  -9   15.08    1.07
   7   1  -8   35.02    1.10
   7   1  -6   44.03    1.82
   7   1  -5    3.74    0.14
   7   1  -4   11.02    0.85
   7   1  -3   52.77    5.46
   7   1  -2   84.97    5.29
   7   1  -1   79.99    3.38
   7   1   0  124.29    3.62
   7   1   1    1.26    0.09
   7   1   2   21.10    0.22
   7   1   3    4.41    0.14
   7   1   4   14.84    0.15
   7   1   5   43.12    0.54
   7   1   6    0.43    0.09
   7   1   7   16.39    0.40
   7   1   8    7.34    0.30
   7   1   9    4.78    0.44
   7   1  10    0.71    0.19
   7   1  11    2.86    0.32
   7   1  12    3.80    0.32
   7   2 -17    0.77    0.10
   7   2 -16    5.61    0.19
   7   2 -15    0.03    0.11
   7   2 -14    0.40    0.19
   7   2 -13   21.37    1.03
   7   2 -12   16.80    0.25
   7   2 -11   27.61    0.47
   7   2 -10   12.99    0.26
   7   2  -9   34.45    1.18
   7   2  -8   44.51    3.21
   7   2  -6    9.41    0.40
   7   2  -5   12.64    2.21
   7   2  -4   27.98    0.68
   7   2  -3   25.59    0.25
   7   2  -2   62.25    0.75
   7   2  -1   41.27    0.49
   7   2   0   10.84    0.12
   7   2   1   22.67    1.95
   7   2   2   29.68    0.73
   7   2   3   21.33    0.46
   7   2   4   17.93    0.54
   7   2   5    9.00    0.33
   7   2   6    0.43    0.11
   7   2   7    5.51    0.12
   7   2   8    3.35    0.41
   7   2   9    6.20    0.40
   7   2  10    1.82    0.23
   7   2  11    6.24    0.33
   7   3 -17    0.40    0.25
   7   3 -16    1.79    0.10
   7   3 -15   11.30    0.40
   7   3 -14    0.68    0.17
   7   3 -13    6.57    0.40
   7   3 -12    4.97    0.23
   7   3 -11    5.23    0.08
   7   3 -10   14.82    0.34
   7   3  -9   36.46    0.31
   7   3  -8    4.54    0.21
   7   3  -7  135.74    2.47
   7   3  -6   32.09    0.77
   7   3  -5   37.22    1.34
   7   3  -4    1.07    0.27
   7   3  -3  119.98    4.38
   7   3  -2    0.23    0.36
   7   3  -1   15.80    0.26
   7   3   0   13.00    0.17
   7   3   1   44.87    1.60
   7   3   2   23.77    1.38
   7   3   3   12.34    0.40
   7   3   4    6.96    0.24
   7   3   5    0.31    0.10
   7   3   6    8.41    0.34
   7   3   7   28.82    1.27
   7   3   8    1.35    0.22
   7   3   9    7.38    0.46
   7   3  10    7.48    0.48
   7   3  11    6.79    0.41
   7   4 -17    6.03    0.17
   7   4 -16    1.67    0.12
   7   4 -15   21.26    0.38
   7   4 -14    2.30    0.07
   7   4 -13    6.83    0.49
   7   4 -12    3.32    0.17
   7   4 -11   40.35    0.76
   7   4 -10    2.58    0.14
   7   4  -9    7.84    0.13
   7   4  -8    0.20    0.25
   7   4  -7    8.77    1.34
   7   4  -6    5.22    0.35
   7   4  -5   25.56    0.73
   7   4  -4   23.28    1.94
   7   4  -3    1.55    0.09
   7   4  -2   53.22    2.29
   7   4   0   13.65    0.52
   7   4   1    9.98    0.11
   7   4   2    2.55    1.14
   7   4   3    9.54    0.41
   7   4   4    6.85    0.22
   7   4   5   28.42    1.21
   7   4   6   42.01    1.17
   7   4   7    9.85    0.40
   7   4   8    6.26    0.50
   7   4   9    1.55    0.22
   7   4  10   11.94    0.45
   7   5 -18    1.09    0.12
   7   5 -17   13.78    0.52
   7   5 -16    2.90    0.12
   7   5 -15    7.89    0.26
   7   5 -14    1.41    0.08
   7   5 -13    7.80    0.39
   7   5 -12    3.24    0.07
   7   5 -11   23.26    0.26
   7   5 -10    3.80    0.05
   7   5  -9    1.36    0.12
   7   5  -8    2.67    0.06
   7   5  -7   23.55    1.06
   7   5  -6   42.86    1.10
   7   5  -4    6.38    0.06
   7   5  -3  150.27    5.77
   7   5  -2   47.29    1.56
   7   5   0    2.31    0.13
   7   5   1   31.65    0.62
   7   5   2   12.69    0.12
   7   5   3    4.87    0.13
   7   5   4   17.06    0.45
   7   5   5   12.26    0.30
   7   5   6    6.66    0.29
   7   5   7    6.98    0.33
   7   5   8    4.96    0.40
   7   5   9    3.14    0.25
   7   5  10    0.15    0.13
   7   6 -18    0.34    0.08
   7   6 -17    0.13    0.07
   7   6 -16    3.85    0.25
   7   6 -15   11.87    0.36
   7   6 -14   50.58    0.93
   7   6 -13   38.52    0.38
   7   6 -12    0.78    0.14
   7   6 -11    5.26    0.19
   7   6 -10   33.60    0.46
   7   6  -9    8.21    0.08
   7   6  -8    8.61    0.21
   7   6  -7    4.37    0.33
   7   6  -6   23.07    0.54
   7   6  -4    5.15    0.06
   7   6  -3   45.63    1.26
   7   6  -2   23.44    1.66
   7   6  -1   12.15    0.59
   7   6   0    9.85    0.25
   7   6   1   27.84    0.64
   7   6   2    2.95    0.24
   7   6   3   21.86    0.56
   7   6   4    6.10    0.41
   7   6   5   15.90    0.81
   7   6   6    0.68    0.16
   7   6   7    6.57    0.43
   7   6   8    2.14    0.20
   7   6   9    0.01    0.12
   7   7 -18    2.28    0.11
   7   7 -17    2.15    0.09
   7   7 -16   31.86    0.57
   7   7 -15    3.85    0.14
   7   7 -14   15.75    0.36
   7   7 -13    3.37    0.20
   7   7 -12   28.24    0.33
   7   7 -11    1.85    0.09
   7   7 -10   40.97    0.33
   7   7  -9    9.56    0.27
   7   7  -8    9.58    0.18
   7   7  -7    9.72    0.24
   7   7  -6   32.33    1.30
   7   7  -5   13.51    0.33
   7   7  -4   35.29    0.81
   7   7  -3    6.89    0.11
   7   7  -2   15.32    0.35
   7   7  -1    1.34    0.21
   7   7   0    4.18    0.09
   7   7   1    6.39    0.19
   7   7   2    2.91    0.14
   7   7   3   12.99    0.28
   7   7   4    3.88    0.24
   7   7   5   21.58    1.13
   7   7   6    1.45    0.25
   7   7   7    0.44    0.15
   7   7   8    0.04    0.10
   7   8 -18    3.38    0.11
   7   8 -17    1.48    0.13
   7   8 -16    6.64    0.14
   7   8 -15    1.65    0.08
   7   8 -14   14.58    0.23
   7   8 -13    8.08    0.13
   7   8 -12   30.78    0.61
   7   8 -11    9.18    0.13
   7   8 -10   23.59    0.60
   7   8  -9    7.60    0.13
   7   8  -8    1.75    0.09
   7   8  -7   13.72    0.34
   7   8  -6   10.30    0.05
   7   8  -5    5.02    0.13
   7   8  -4   14.53    0.44
   7   8  -3    2.19    0.11
   7   8  -2    9.62    0.25
   7   8  -1   13.68    0.42
   7   8   0   16.73    0.49
   7   8   1    1.96    0.12
   7   8   2   10.52    0.31
   7   8   3    2.63    0.13
   7   8   4    2.86    0.27
   7   8   5    0.89    0.18
   7   8   6    0.91    0.14
   7   8   7    3.87    0.26
   7   9 -18    9.30    0.26
   7   9 -17    3.00    0.08
   7   9 -16    1.64    0.09
   7   9 -15    0.73    0.07
   7   9 -14   33.38    0.71
   7   9 -13    0.06    0.10
   7   9 -12    0.80    0.11
   7   9 -11   16.78    0.32
   7   9 -10    5.11    0.07
   7   9  -9    4.08    0.12
   7   9  -8    6.59    0.12
   7   9  -7   24.62    0.40
   7   9  -6    4.89    0.10
   7   9  -5    2.73    0.08
   7   9  -4   11.58    0.10
   7   9  -3    2.29    0.16
   7   9  -2   33.24    0.29
   7   9  -1   28.41    0.48
   7   9   0    5.28    0.14
   7   9   1   13.49    0.52
   7   9   2   25.38    0.85
   7   9   3    5.54    0.28
   7   9   4    4.23    0.15
   7   9   5    2.17    0.14
   7   9   6    0.27    0.12
   7  10 -18    1.58    0.07
   7  10 -17    1.79    0.13
   7  10 -16   16.27    0.30
   7  10 -15   12.47    0.29
   7  10 -14    8.37    0.17
   7  10 -13   21.90    0.40
   7  10 -12    4.64    0.37
   7  10 -11   81.52    1.28
   7  10 -10    2.49    0.07
   7  10  -9   34.44    0.91
   7  10  -8    9.08    0.36
   7  10  -7    4.98    0.10
   7  10  -6   11.02    0.21
   7  10  -5    5.16    0.08
   7  10  -4    5.80    0.27
   7  10  -3    9.61    0.33
   7  10  -2   27.07    0.69
   7  10  -1   15.40    0.40
   7  10   0   12.27    0.28
   7  10   1    5.00    0.21
   7  10   2    1.66    0.12
   7  10   3    8.95    0.36
   7  10   4    5.77    0.16
   7  10   5    2.41    0.19
   7  11 -18    0.30    0.06
   7  11 -17    2.32    0.12
   7  11 -16    9.87    0.65
   7  11 -15    3.65    0.13
   7  11 -14    6.47    0.32
   7  11 -13    3.40    0.11
   7  11 -12    0.94    0.18
   7  11 -11    4.77    0.10
   7  11 -10    4.38    0.11
   7  11  -9   17.84    0.43
   7  11  -8    4.46    0.19
   7  11  -7   15.49    0.22
   7  11  -6    8.37    0.16
   7  11  -5    3.83    0.11
   7  11  -4   13.19    0.11
   7  11  -3    3.07    0.08
   7  11  -2    2.08    0.08
   7  11  -1    3.29    0.15
   7  11   0   10.01    0.58
   7  11   1    6.09    0.71
   7  11   2    2.27    0.11
   7  11   3    4.37    0.16
   7  12 -17    4.48    0.16
   7  12 -16    1.46    0.30
   7  12 -15    1.87    0.09
   7  12 -14    0.54    0.19
   7  12 -13    7.13    0.43
   7  12 -12    3.21    0.14
   7  12 -11    0.18    0.11
   7  12 -10    1.03    0.09
   7  12  -9   36.70    0.53
   7  12  -8   15.39    0.20
   7  12  -7    4.75    0.15
   7  12  -6   10.77    0.23
   7  12  -5   19.75    0.45
   7  12  -4    3.98    0.17
   7  12  -3    8.99    0.10
   7  12  -2   12.78    0.35
   7  12  -1    0.05    0.10
   7  12   0    0.22    0.07
   7  12   1    4.01    0.17
   7  12   2    2.20    0.14
   7  13 -17    3.42    0.28
   7  13 -16    1.12    0.12
   7  13 -15    9.72    0.32
   7  13 -14    2.26    0.13
   7  13 -13   10.27    0.23
   7  13 -12    7.63    0.17
   7  13 -11    0.65    0.12
   7  13 -10    0.64    0.09
   7  13  -9    3.73    0.19
   7  13  -8    2.49    0.14
   7  13  -7    1.60    0.11
   7  13  -6    2.26    0.07
   7  13  -5   17.19    0.29
   7  13  -4   11.34    0.29
   7  13  -3    0.52    0.09
   7  13  -2    4.77    0.16
   7  13  -1    5.40    0.39
   7  13   0    2.27    0.33
   7  13   1    2.35    0.17
   7  14 -16    1.70    0.20
   7  14 -15    8.15    0.57
   7  14 -14    3.75    0.19
   7  14 -13    3.59    0.16
   7  14 -12    0.76    0.17
   7  14 -11    0.29    0.14
   7  14 -10    9.78    0.24
   7  14  -9    2.86    0.11
   7  14  -8   14.22    0.48
   7  14  -7    6.84    0.12
   7  14  -6    3.57    0.13
   7  14  -5    9.31    0.22
   7  14  -4    1.44    0.06
   7  14  -3    0.40    0.07
   7  14  -2    1.54    0.12
   7  14  -1    4.10    0.16
   7  15 -15    1.13    0.17
   7  15 -14    8.43    0.43
   7  15 -13    5.90    0.27
   7  15 -12    0.94    0.12
   7  15 -11    2.52    0.16
   7  15 -10    2.37    0.32
   7  15  -9    3.55    0.10
   7  15  -8    2.10    0.08
   7  15  -7    2.44    0.13
   7  15  -6    1.18    0.19
   7  15  -5    0.62    0.05
   7  15  -4    3.30    0.10
   7  15  -3    9.49    0.26
   7  16 -12   13.70    0.57
   7  16 -11    1.32    0.21
   7  16 -10    0.10    0.14
   7  16  -9    4.48    0.30
   7  16  -8    0.96    0.11
   7  16  -7    4.38    0.12
   7  16  -6    6.70    0.28
   7  16  -5    0.54    0.13
   7  17 -11    1.13    0.14
   7  17 -10    1.57    0.18
   7  17  -9    1.34    0.17
   8 -10   5   51.47    2.28
   8 -10   6   19.74    0.62
   8 -10   7    0.26    0.42
   8  -9  -9    0.12    0.12
   8  -9  -8    1.66    0.22
   8  -9  -7    2.99    0.25
   8  -9  -6    0.03    0.15
   8  -9  -5    4.01    0.41
   8  -9   4   14.02    0.79
   8  -9   5   14.09    0.37
   8  -9   6    6.00    0.58
   8  -9   7    8.88    0.88
   8  -9   8   32.81    1.30
   8  -9   9   32.44    0.97
   8  -8 -10    1.00    0.14
   8  -8  -9    1.15    0.21
   8  -8  -8    4.12    0.35
   8  -8  -7    2.75    0.25
   8  -8  -6    4.95    0.38
   8  -8  -5   16.61    0.43
   8  -8  -4    5.98    0.39
   8  -8  -3    8.62    0.50
   8  -8  -2    6.58    0.55
   8  -8   3   13.32    0.85
   8  -8   4    3.39    0.19
   8  -8   5   40.83    2.47
   8  -8   6   16.93    0.31
   8  -8   7   15.23    0.65
   8  -8   8    9.78    0.65
   8  -8   9   23.20    1.30
   8  -7 -11    0.97    0.15
   8  -7 -10    0.75    0.17
   8  -7  -9    4.66    0.37
   8  -7  -8    0.47    0.14
   8  -7  -7   12.60    0.57
   8  -7  -6    1.32    0.18
   8  -7  -5   14.72    0.77
   8  -7  -4    7.03    0.29
   8  -7  -2   16.88    0.49
   8  -7   2    7.29    0.41
   8  -7   3  126.59    4.01
   8  -7   4    3.77    0.30
   8  -7   5    0.13    0.19
   8  -7   6    0.85    0.47
   8  -7   7   43.31    1.73
   8  -7   8    5.60    0.32
   8  -7   9    9.27    0.42
   8  -6 -12    0.23    0.11
   8  -6 -11    2.76    0.26
   8  -6 -10    5.95    0.36
   8  -6  -9   12.56    0.51
   8  -6  -8    4.22    0.37
   8  -6  -7    4.12    0.32
   8  -6  -6    5.71    0.22
   8  -6  -5   15.27    0.29
   8  -6  -4    0.72    0.26
   8  -6  -3    6.65    0.25
   8  -6  -2    1.89    0.16
   8  -6   2   18.75    0.60
   8  -6   3   23.16    1.01
   8  -6   4   32.45    0.87
   8  -6   5   44.51    1.69
   8  -6   6    5.43    0.41
   8  -6   7    8.94    0.49
   8  -6   8   26.69    1.07
   8  -6   9    8.76    0.45
   8  -5 -13    0.62    0.13
   8  -5 -12    1.10    0.20
   8  -5 -11    0.86    0.20
   8  -5 -10    2.75    0.30
   8  -5  -9   12.23    0.67
   8  -5  -8    0.21    0.14
   8  -5  -7   10.26    0.62
   8  -5  -6    3.23    0.26
   8  -5  -5   18.21    0.68
   8  -5  -4   12.71    0.21
   8  -5  -3    2.90    0.32
   8  -5  -2    4.37    0.23
   8  -5  -1  113.98    3.90
   8  -5   0    8.30    0.17
   8  -5   1    2.82    0.68
   8  -5   2   97.42    4.13
   8  -5   3    2.48    0.19
   8  -5   4   36.63    2.08
   8  -5   5   38.32    1.06
   8  -5   6    3.24    0.39
   8  -5   7    3.30    0.29
   8  -5   8   18.38    0.95
   8  -5   9    5.50    0.44
   8  -4 -13    6.25    0.40
   8  -4 -12   10.02    0.62
   8  -4 -11    0.17    0.17
   8  -4 -10    3.80    0.47
   8  -4  -9    0.37    0.23
   8  -4  -8    3.28    0.37
   8  -4  -7   27.78    0.54
   8  -4  -6    2.16    0.16
   8  -4  -5    3.47    0.16
   8  -4  -4   71.48    3.91
   8  -4  -3   40.60    0.32
   8  -4  -2   12.99    1.03
   8  -4  -1   29.09    0.92
   8  -4   0   22.76    1.78
   8  -4   1   11.63    0.85
   8  -4   2   95.02    1.48
   8  -4   3   17.93    0.48
   8  -4   4   10.48    0.29
   8  -4   5   16.65    1.38
   8  -4   6   22.56    0.49
   8  -4   7    7.59    0.52
   8  -4   8   27.94    1.11
   8  -4   9    8.92    0.66
   8  -3 -14    1.94    0.15
   8  -3 -13    8.22    0.43
   8  -3 -12    7.00    0.35
   8  -3 -11   12.01    0.60
   8  -3 -10    2.38    0.42
   8  -3  -9    7.32    0.28
   8  -3  -8    5.29    0.11
   8  -3  -7    1.60    0.41
   8  -3  -6   29.42    1.33
   8  -3  -5    6.25    0.14
   8  -3  -4   10.29    0.65
   8  -3  -3   34.61    2.52
   8  -3  -2   81.64    1.82
   8  -3  -1   47.26    1.15
   8  -3   0   62.86    0.17
   8  -3   1    7.59    0.76
   8  -3   2   37.80    1.19
   8  -3   3    2.61    0.18
   8  -3   4   47.69    1.16
   8  -3   5    2.76    0.47
   8  -3   6   90.76    9.01
   8  -3   7   10.90    0.70
   8  -3   8    3.79    0.24
   8  -3   9    4.66    0.28
   8  -2 -15    0.37    0.12
   8  -2 -14    3.24    0.34
   8  -2 -13    0.03    0.19
   8  -2 -12    4.51    0.42
   8  -2 -11    6.00    0.35
   8  -2 -10    4.13    0.15
   8  -2  -9    7.44    0.36
   8  -2  -8    5.95    0.14
   8  -2  -7   20.46    0.73
   8  -2  -5    5.43    0.38
   8  -2  -4   11.89    0.29
   8  -2  -3    0.28    0.18
   8  -2  -2   91.57    3.70
   8  -2  -1   25.49    0.48
   8  -2   0  204.24    8.51
   8  -2   1   34.34    0.23
   8  -2   2    3.16    0.20
   8  -2   3    4.25    0.22
   8  -2   4  135.37    3.43
   8  -2   5    9.41    0.23
   8  -2   6    2.89    0.34
   8  -2   7   29.59    1.28
   8  -2   8    3.88    0.23
   8  -2   9    5.20    0.31
   8  -2  10    0.89    0.18
   8  -1 -15    1.61    0.09
   8  -1 -14    6.36    0.20
   8  -1 -13   10.09    0.24
   8  -1 -12    5.25    0.25
   8  -1 -11   16.94    0.78
   8  -1 -10    2.65    0.18
   8  -1  -9    7.11    0.26
   8  -1  -8   11.40    0.49
   8  -1  -7    1.10    0.11
   8  -1  -6   38.40    2.59
   8  -1  -5    1.37    0.35
   8  -1  -4   34.03    2.87
   8  -1  -3    5.61    0.48
   8  -1  -2   88.44    0.92
   8  -1  -1   15.22    0.37
   8  -1   0    9.64    0.30
   8  -1   1  105.25    4.99
   8  -1   2   59.53    0.72
   8  -1   3    9.48    0.57
   8  -1   4    4.08    0.11
   8  -1   5    9.52    0.38
   8  -1   6    2.86    0.28
   8  -1   7    5.50    0.10
   8  -1   8   11.56    0.39
   8  -1   9    5.64    0.35
   8  -1  10    1.92    0.46
   8  -1  11    1.99    0.17
   8   0 -16    0.28    0.11
   8   0 -15    3.96    0.17
   8   0 -14    3.42    0.24
   8   0 -13    1.00    0.11
   8   0 -12    5.54    0.15
   8   0 -11   26.51    0.87
   8   0 -10    9.61    0.33
   8   0  -9    0.64    0.14
   8   0  -8    1.42    0.10
   8   0  -7    0.64    0.08
   8   0  -6    6.79    0.28
   8   0  -5   19.05    1.21
   8   0  -4   52.94    1.05
   8   0  -3    4.59    0.29
   8   0  -2   72.07    2.52
   8   0  -1  147.72    6.57
   8   0   0   20.85    0.08
   8   0   1   29.71    0.39
   8   0   2   40.25    1.77
   8   0   3   33.11    0.32
   8   0   4    5.03    0.25
   8   0   5   23.17    0.17
   8   0   6    2.25    0.29
   8   0   7    7.49    0.37
   8   0   8    6.10    0.30
   8   0   9    3.71    0.27
   8   0  10   12.76    0.66
   8   0  11    7.62    0.65
   8   1 -16    2.68    0.14
   8   1 -15    5.28    0.17
   8   1 -14    1.29    0.13
   8   1 -13    0.73    0.12
   8   1 -12    0.34    0.18
   8   1 -11   20.18    0.33
   8   1 -10   34.88    0.57
   8   1  -9   11.33    0.18
   8   1  -8   43.24    0.88
   8   1  -7   14.54    0.98
   8   1  -6    7.43    1.04
   8   1  -5   12.02    0.58
   8   1  -4    9.33    0.55
   8   1  -3    6.95    0.27
   8   1  -2   22.01    0.40
   8   1  -1   46.24    0.67
   8   1   0    9.42    0.68
   8   1   1    2.67    0.12
   8   1   2    1.38    0.05
   8   1   3   51.78    2.07
   8   1   4    5.92    0.24
   8   1   5   13.93    0.68
   8   1   6    0.16    0.11
   8   1   7    8.76    0.36
   8   1   8    2.36    0.30
   8   1   9   21.81    0.87
   8   1  10   12.05    0.58
   8   1  11    1.33    0.21
   8   1  12    3.64    0.26
   8   2 -16    4.38    0.12
   8   2 -15    1.37    0.15
   8   2 -14    2.41    0.10
   8   2 -13    4.06    0.29
   8   2 -12   13.59    0.37
   8   2 -11    3.30    0.11
   8   2 -10    3.89    0.08
   8   2  -9    9.77    0.15
   8   2  -8    7.78    0.12
   8   2  -6    5.24    0.29
   8   2  -5    9.32    0.19
   8   2  -4   12.88    0.52
   8   2  -3   80.98    4.00
   8   2  -2   19.07    1.43
   8   2  -1   37.37    2.76
   8   2   0   14.70    0.68
   8   2   1    1.28    0.33
   8   2   2   25.40    1.49
   8   2   3   76.18    2.28
   8   2   4    2.47    0.13
   8   2   5    1.42    0.11
   8   2   6    3.96    0.24
   8   2   7    3.01    0.28
   8   2   8    0.37    0.19
   8   2   9    0.22    0.17
   8   2  10    0.26    0.17
   8   2  11    3.80    0.25
   8   3 -17    0.39    0.09
   8   3 -16    4.95    0.38
   8   3 -15    7.13    0.35
   8   3 -14    0.63    0.11
   8   3 -13    7.49    0.17
   8   3 -12    5.68    0.21
   8   3 -11   13.67    0.65
   8   3 -10   23.08    0.53
   8   3  -9    6.67    0.15
   8   3  -8    7.26    0.15
   8   3  -7    1.87    0.82
   8   3  -6   14.82    0.36
   8   3  -5   58.84    0.93
   8   3  -4   40.13    1.15
   8   3  -3   71.67    2.24
   8   3  -2   36.23    0.68
   8   3  -1   18.99    0.23
   8   3   0    0.68    0.21
   8   3   2    5.17    0.13
   8   3   3    2.45    0.16
   8   3   4   19.25    0.47
   8   3   5    1.77    0.13
   8   3   6    0.51    0.12
   8   3   7    3.46    0.39
   8   3   8    2.58    0.32
   8   3   9    6.19    0.44
   8   3  10    0.88    0.16
   8   4 -17    5.53    0.52
   8   4 -16   11.33    0.56
   8   4 -15    3.31    0.10
   8   4 -14    0.94    0.14
   8   4 -13    4.64    0.22
   8   4 -12   21.49    0.87
   8   4 -11    5.08    0.08
   8   4 -10    7.62    0.14
   8   4  -9    0.04    0.14
   8   4  -8   15.29    0.44
   8   4  -7   15.91    0.09
   8   4  -6   10.09    0.15
   8   4  -5  139.87    4.26
   8   4  -4   16.02    0.58
   8   4  -3   29.08    0.83
   8   4  -2   23.68    1.34
   8   4  -1   18.61    1.70
   8   4   0   22.34    0.45
   8   4   1    7.88    0.13
   8   4   2   21.76    0.24
   8   4   3    1.60    0.10
   8   4   4   10.92    0.30
   8   4   5    0.13    0.15
   8   4   6   27.11    0.89
   8   4   7    3.50    0.26
   8   4   8    0.54    0.25
   8   4   9    3.09    0.32
   8   4  10    0.25    0.12
   8   5 -17    2.98    0.13
   8   5 -16    5.07    0.17
   8   5 -15    4.56    0.07
   8   5 -14   18.25    0.45
   8   5 -13    1.87    0.07
   8   5 -12   14.49    0.23
   8   5 -11    8.30    0.21
   8   5 -10   10.53    0.24
   8   5  -9   11.74    0.05
   8   5  -8    7.29    0.13
   8   5  -7   30.30    0.34
   8   5  -6   37.83    1.11
   8   5  -5    4.49    0.12
   8   5  -4   23.08    1.31
   8   5  -3    7.70    0.67
   8   5  -2    4.05    0.13
   8   5  -1    2.74    0.27
   8   5   0    3.22    0.46
   8   5   1    0.02    0.16
   8   5   2    3.93    0.10
   8   5   3    2.86    0.23
   8   5   4    2.53    0.11
   8   5   5    8.95    0.80
   8   5   6   21.87    0.59
   8   5   7    7.29    0.49
   8   5   8    4.67    0.31
   8   5   9    0.55    0.12
   8   6 -17    1.66    0.13
   8   6 -16    2.41    0.09
   8   6 -15   21.61    0.52
   8   6 -14    5.53    0.18
   8   6 -13   13.89    0.32
   8   6 -12   19.96    0.44
   8   6 -11   15.43    0.27
   8   6 -10   19.66    0.28
   8   6  -9   10.18    0.38
   8   6  -8   32.83    0.21
   8   6  -7   10.68    0.20
   8   6  -6   46.39    1.38
   8   6  -5   34.04    1.07
   8   6  -4    3.48    0.04
   8   6  -3    5.10    0.42
   8   6  -2    4.07    0.30
   8   6  -1   12.92    0.22
   8   6   0    1.33    0.13
   8   6   1   22.84    0.44
   8   6   2   22.97    0.68
   8   6   3    2.26    0.31
   8   6   4   11.26    0.53
   8   6   5    2.30    0.41
   8   6   6   15.41    1.02
   8   6   7    4.19    0.30
   8   6   8    1.90    0.23
   8   7 -17    0.77    0.11
   8   7 -16    0.86    0.06
   8   7 -15    1.56    0.21
   8   7 -14    2.98    0.21
   8   7 -13    5.05    0.10
   8   7 -12    4.95    0.33
   8   7 -11   21.65    0.35
   8   7 -10   10.96    0.12
   8   7  -9    1.31    0.03
   8   7  -8   26.18    0.63
   8   7  -7   48.32    0.45
   8   7  -6   32.79    0.24
   8   7  -5    6.87    0.12
   8   7  -4    6.30    0.11
   8   7  -3    1.28    0.15
   8   7  -2    5.21    0.10
   8   7  -1    1.04    0.17
   8   7   0   33.63    0.83
   8   7   1   10.56    0.48
   8   7   2    6.00    0.20
   8   7   3    5.86    0.27
   8   7   4    1.13    0.14
   8   7   5    8.80    0.34
   8   7   6    7.82    0.41
   8   7   7    2.42    0.22
   8   8 -18    0.16    0.07
   8   8 -17    1.58    0.09
   8   8 -16    0.57    0.06
   8   8 -15    2.12    0.13
   8   8 -14    4.02    0.15
   8   8 -13   32.17    0.47
   8   8 -12    3.13    0.28
   8   8 -11   10.44    0.21
   8   8 -10    2.53    0.11
   8   8  -9    2.25    0.10
   8   8  -8    7.82    0.20
   8   8  -7   44.76    0.99
   8   8  -6    3.87    0.21
   8   8  -5    7.84    0.24
   8   8  -4    2.26    0.36
   8   8  -3    2.49    0.14
   8   8  -2   10.47    0.21
   8   8  -1    0.70    0.07
   8   8   0    5.50    0.50
   8   8   1    1.54    0.20
   8   8   2    0.42    0.14
   8   8   3    2.14    0.19
   8   8   4    3.51    0.18
   8   8   5    8.66    0.25
   8   8   6    1.69    0.18
   8   9 -17    0.29    0.06
   8   9 -16    2.61    0.13
   8   9 -15   29.33    0.66
   8   9 -14    1.87    0.10
   8   9 -13   19.96    0.26
   8   9 -12    0.51    0.09
   8   9 -11    2.17    0.23
   8   9 -10    1.47    0.09
   8   9  -9   19.19    0.32
   8   9  -8   14.98    0.47
   8   9  -7    8.48    0.17
   8   9  -6    1.46    0.16
   8   9  -5    0.52    0.07
   8   9  -4    8.60    0.24
   8   9  -3    1.58    0.12
   8   9  -2    6.30    0.09
   8   9  -1    7.86    0.17
   8   9   0   14.65    0.23
   8   9   1    2.79    0.13
   8   9   2    3.05    0.15
   8   9   3    7.82    0.30
   8   9   4    1.43    0.14
   8   9   5    1.93    0.13
   8  10 -17    1.61    0.15
   8  10 -16    1.17    0.07
   8  10 -15    8.69    0.42
   8  10 -14    9.94    0.21
   8  10 -13    4.95    0.20
   8  10 -12   17.30    0.35
   8  10 -11    8.73    0.23
   8  10 -10    0.50    0.13
   8  10  -9   31.34    0.53
   8  10  -8   20.17    0.42
   8  10  -7    1.79    0.07
   8  10  -6   10.72    0.15
   8  10  -5    3.13    0.13
   8  10  -4   19.90    0.25
   8  10  -3    0.50    0.06
   8  10  -2    4.60    0.19
   8  10  -1    0.28    0.08
   8  10   0    0.97    0.08
   8  10   1    2.98    0.18
   8  10   2    1.41    0.21
   8  10   3    3.43    0.23
   8  10   4    0.71    0.08
   8  11 -17    1.82    0.15
   8  11 -16    6.98    0.13
   8  11 -15    2.45    0.11
   8  11 -14    8.03    0.09
   8  11 -13    0.52    0.12
   8  11 -12    6.80    0.23
   8  11 -11   21.39    0.46
   8  11 -10   18.06    0.16
   8  11  -9    6.63    0.35
   8  11  -8   13.16    0.37
   8  11  -7    5.86    0.30
   8  11  -6    8.16    0.15
   8  11  -5   18.79    0.24
   8  11  -4    1.98    0.06
   8  11  -3    0.87    0.11
   8  11  -2   11.51    0.49
   8  11  -1    3.12    0.31
   8  11   0    0.74    0.11
   8  11   1    0.62    0.18
   8  11   2    6.28    0.39
   8  11   3    1.84    0.13
   8  12 -17    2.37    0.21
   8  12 -16    9.95    0.40
   8  12 -15    6.20    0.44
   8  12 -14   13.09    0.52
   8  12 -13    2.85    0.15
   8  12 -12    0.23    0.11
   8  12 -11    2.89    0.17
   8  12 -10    7.91    0.34
   8  12  -9    3.18    0.17
   8  12  -8   26.26    0.26
   8  12  -7   15.17    0.46
   8  12  -6    1.36    0.08
   8  12  -5   19.96    0.37
   8  12  -4   11.12    0.12
   8  12  -3   11.17    0.37
   8  12  -2    3.89    0.14
   8  12  -1    2.79    0.62
   8  12   0    6.15    0.18
   8  12   1    4.71    0.22
   8  13 -16   41.03    1.65
   8  13 -15    2.80    0.15
   8  13 -14    1.25    0.10
   8  13 -13    2.11    0.21
   8  13 -12    9.00    0.27
   8  13 -11    1.06    0.12
   8  13 -10    1.18    0.18
   8  13  -9    2.40    0.11
   8  13  -8   22.06    0.45
   8  13  -7    6.70    0.14
   8  13  -6    9.45    0.30
   8  13  -5    5.60    0.13
   8  13  -4    6.89    0.14
   8  13  -3    6.17    0.12
   8  13  -2    1.91    0.17
   8  13  -1    0.75    0.13
   8  13   0    1.24    0.15
   8  14 -15    2.89    0.24
   8  14 -14    6.05    0.34
   8  14 -13    4.24    0.31
   8  14 -12    8.09    0.29
   8  14 -11    0.16    0.12
   8  14 -10   20.14    0.63
   8  14  -9   28.12    0.36
   8  14  -8    0.33    0.08
   8  14  -7    3.24    0.11
   8  14  -6   16.08    0.30
   8  14  -5    0.16    0.04
   8  14  -4    2.65    0.13
   8  14  -3    7.92    0.35
   8  14  -2    0.24    0.06
   8  15 -12    6.12    0.32
   8  15 -11    0.19    0.17
   8  15 -10    3.23    0.19
   8  15  -9   19.54    1.01
   8  15  -8    2.56    0.11
   8  15  -7    0.02    0.07
   8  15  -6    1.26    0.09
   8  15  -5    3.46    0.16
   8  15  -4    6.48    0.20
   8  16 -11    1.44    0.15
   8  16 -10    0.09    0.14
   8  16  -9    1.70    0.19
   8  16  -8    2.92    0.12
   8  16  -7    1.15    0.05
   9 -10   6    1.17    0.29
   9 -10   7    6.39    0.48
   9  -9  -9    1.03    0.15
   9  -9  -8    0.08    0.15
   9  -9  -7    4.83    0.25
   9  -9  -6    6.76    0.32
   9  -9  -5    0.03    0.19
   9  -9  -4    2.30    0.31
   9  -9  -3   15.79    0.75
   9  -9   4    7.12    0.38
   9  -9   5    9.83    0.35
   9  -9   6    7.48    0.32
   9  -9   7    1.26    0.24
   9  -9   8   17.85    0.76
   9  -8 -10    0.64    0.15
   9  -8  -9    3.05    0.25
   9  -8  -8    0.06    0.14
   9  -8  -7    1.81    0.36
   9  -8  -6   12.44    0.50
   9  -8  -5    1.48    0.19
   9  -8  -4    1.85    0.32
   9  -8  -3    7.27    0.50
   9  -8  -2   26.87    1.43
   9  -8  -1    8.42    0.26
   9  -8   0    2.17    0.17
   9  -8   3    5.21    0.35
   9  -8   4    9.72    0.43
   9  -8   5    2.15    0.24
   9  -8   6    6.62    0.37
   9  -8   7    6.73    0.45
   9  -8   8   35.26    1.65
   9  -7 -11    1.52    0.19
   9  -7 -10    1.53    0.22
   9  -7  -9    0.68    0.18
   9  -7  -8    8.67    0.48
   9  -7  -7    5.96    0.62
   9  -7  -6    4.30    0.16
   9  -7  -5   39.31    1.49
   9  -7  -4    7.51    0.21
   9  -7  -3    5.48    0.37
   9  -7  -2    1.90    0.16
   9  -7   0    7.98    0.30
   9  -7   1    5.32    0.50
   9  -7   2    8.30    0.72
   9  -7   3    1.34    0.25
   9  -7   4    2.18    0.23
   9  -7   5   10.18    0.87
   9  -7   6   39.28    1.53
   9  -7   7   14.39    0.60
   9  -7   8    0.00    0.24
   9  -6 -12    0.75    0.12
   9  -6 -11    3.86    0.23
   9  -6 -10    8.71    0.49
   9  -6  -9    1.44    0.29
   9  -6  -8   20.66    0.91
   9  -6  -7   28.87    1.48
   9  -6  -6   10.02    0.97
   9  -6  -5    3.01    0.44
   9  -6  -4    4.20    0.29
   9  -6  -3    9.64    0.48
   9  -6  -2   17.88    0.16
   9  -6  -1   12.49    0.09
   9  -6   2    1.81    0.26
   9  -6   3   14.45    1.37
   9  -6   4   21.95    0.23
   9  -6   5   33.77    1.60
   9  -6   6   17.55    0.58
   9  -6   7   20.33    1.03
   9  -6   8   13.94    0.79
   9  -5 -12    0.36    0.14
   9  -5 -11    0.70    0.19
   9  -5 -10    0.40    0.21
   9  -5  -9   10.56    0.52
   9  -5  -8    5.85    0.33
   9  -5  -7   19.20    0.44
   9  -5  -6    6.21    0.32
   9  -5  -5   11.42    0.17
   9  -5  -4    7.99    0.81
   9  -5  -3    9.76    0.12
   9  -5  -2    0.66    0.59
   9  -5  -1   22.70    0.85
   9  -5   0    2.63    0.28
   9  -5   1    3.32    0.51
   9  -5   2    6.21    0.34
   9  -5   3    8.47    1.08
   9  -5   4   48.98    3.77
   9  -5   5   17.76    0.25
   9  -5   6    7.35    0.23
   9  -5   7   14.43    0.46
   9  -5   8    3.08    0.21
   9  -4 -13    4.20    0.24
   9  -4 -12    3.19    0.31
   9  -4 -11    3.25    0.40
   9  -4 -10    0.15    0.20
   9  -4  -9   16.36    0.60
   9  -4  -8    4.75    0.82
   9  -4  -7    1.10    0.12
   9  -4  -6   16.09    0.43
   9  -4  -5    4.42    0.55
   9  -4  -4    9.12    0.09
   9  -4  -3   35.56    1.16
   9  -4  -2   18.23    2.25
   9  -4  -1    5.05    0.23
   9  -4   0    8.40    0.29
   9  -4   1    2.11    0.28
   9  -4   2   13.34    0.30
   9  -4   3    8.35    0.15
   9  -4   4    1.53    0.58
   9  -4   5   55.65    2.11
   9  -4   6    1.96    0.24
   9  -4   7   20.61    1.00
   9  -4   8    1.91    0.17
   9  -3 -14    0.23    0.13
   9  -3 -13    0.54    0.17
   9  -3 -12   13.32    0.54
   9  -3 -11    1.26    0.27
   9  -3 -10    1.05    0.33
   9  -3  -9   11.25    0.78
   9  -3  -8    6.20    0.15
   9  -3  -7    4.64    0.39
   9  -3  -6    7.14    0.32
   9  -3  -5    8.75    0.24
   9  -3  -4    4.45    0.06
   9  -3  -3   10.96    0.26
   9  -3  -2   23.70    2.12
   9  -3  -1   22.65    1.68
   9  -3   0    5.41    0.51
   9  -3   1    2.32    0.28
   9  -3   2    2.10    0.09
   9  -3   3   36.71    1.17
   9  -3   4    7.55    0.10
   9  -3   5   33.45    0.40
   9  -3   6    0.67    0.17
   9  -3   7   12.25    0.24
   9  -3   8   18.78    0.94
   9  -3   9    8.12    0.38
   9  -2 -14    0.89    0.18
   9  -2 -13    1.81    0.16
   9  -2 -12    2.44    0.19
   9  -2 -11   24.35    0.58
   9  -2 -10    7.98    0.69
   9  -2  -9    1.37    0.17
   9  -2  -8   24.34    1.02
   9  -2  -7    4.22    0.16
   9  -2  -6   16.95    0.78
   9  -2  -5    6.30    0.16
   9  -2  -4    8.37    0.36
   9  -2  -3   17.63    0.44
   9  -2  -2   44.60    0.37
   9  -2  -1   34.22    0.54
   9  -2   0    4.39    0.22
   9  -2   1    2.33    0.13
   9  -2   2    2.08    0.08
   9  -2   3   53.97    0.93
   9  -2   4    1.59    0.13
   9  -2   5   22.46    0.63
   9  -2   6   13.03    0.20
   9  -2   7    4.83    0.28
   9  -2   8    1.93    0.27
   9  -2   9   13.45    0.80
   9  -2  10    0.57    0.20
   9  -1 -15    5.09    0.19
   9  -1 -14    2.62    0.21
   9  -1 -13    1.72    0.11
   9  -1 -12    3.53    0.20
   9  -1 -11    0.75    0.15
   9  -1 -10   32.93    0.61
   9  -1  -9    4.03    0.19
   9  -1  -8   15.04    0.18
   9  -1  -7    0.06    0.15
   9  -1  -6   20.99    0.40
   9  -1  -5    8.37    0.37
   9  -1  -4   35.44    1.08
   9  -1  -3   19.34    0.48
   9  -1  -2   14.25    1.10
   9  -1  -1    4.27    0.07
   9  -1   0    5.05    0.04
   9  -1   1   37.00    1.41
   9  -1   2   12.75    1.34
   9  -1   3   18.52    0.81
   9  -1   4   15.88    0.30
   9  -1   5   13.24    0.39
   9  -1   6    6.99    0.19
   9  -1   7   13.85    0.41
   9  -1   8    1.44    0.42
   9  -1   9    5.62    0.34
   9  -1  10   17.65    0.77
   9  -1  11    6.02    0.45
   9   0 -15    0.43    0.09
   9   0 -14    0.16    0.11
   9   0 -13    0.31    0.15
   9   0 -12    5.41    0.20
   9   0 -11    5.74    0.35
   9   0 -10   18.92    0.55
   9   0  -9    0.37    0.12
   9   0  -8    2.17    0.28
   9   0  -7   20.97    0.49
   9   0  -6    1.09    0.14
   9   0  -5   12.49    0.55
   9   0  -4   54.03    2.63
   9   0  -3    0.59    0.35
   9   0  -2   13.57    1.04
   9   0  -1   13.04    0.24
   9   0   0    6.11    0.41
   9   0   1   50.31    0.62
   9   0   2    9.69    0.63
   9   0   3    7.37    0.14
   9   0   4   33.28    0.61
   9   0   5    4.72    0.26
   9   0   6   12.12    0.54
   9   0   7   28.62    0.77
   9   0   8    7.00    0.32
   9   0   9    4.23    0.29
   9   0  10   15.38    0.68
   9   0  11    4.54    0.30
   9   1 -16    1.06    0.09
   9   1 -15    0.85    0.07
   9   1 -14    0.26    0.10
   9   1 -13    2.71    0.16
   9   1 -12   12.89    0.56
   9   1 -11    5.01    0.22
   9   1 -10   20.11    0.31
   9   1  -9    6.33    0.18
   9   1  -8    0.72    0.13
   9   1  -7    8.73    0.40
   9   1  -6   90.46    1.43
   9   1  -5   22.63    0.99
   9   1  -4    5.01    0.40
   9   1  -3    3.82    0.83
   9   1  -2    4.48    0.46
   9   1  -1   32.83    1.43
   9   1   0   12.75    0.45
   9   1   1    2.88    0.16
   9   1   2   19.23    0.34
   9   1   3    5.40    0.27
   9   1   4   80.56    1.66
   9   1   5    2.04    0.31
   9   1   6    3.40    0.20
   9   1   7    3.33    0.37
   9   1   8   19.45    1.10
   9   1   9    2.00    0.21
   9   1  10    0.03    0.14
   9   1  11    4.65    0.25
   9   2 -16    0.00    0.08
   9   2 -15    2.31    0.15
   9   2 -14    1.61    0.09
   9   2 -13    3.35    0.10
   9   2 -12    4.67    0.14
   9   2 -11    0.90    0.15
   9   2 -10    3.63    0.19
   9   2  -9   20.19    0.31
   9   2  -8   13.42    0.28
   9   2  -7   20.65    0.64
   9   2  -6    9.65    0.29
   9   2  -5   35.29    0.86
   9   2  -4   15.72    0.42
   9   2  -3    8.11    0.13
   9   2  -2   12.06    0.41
   9   2  -1    0.31    0.33
   9   2   0   44.58    1.36
   9   2   1    3.65    0.12
   9   2   2   47.47    0.86
   9   2   3    1.97    0.21
   9   2   4    4.43    0.21
   9   2   5   26.66    0.80
   9   2   6   20.41    0.83
   9   2   7   10.85    0.61
   9   2   8    9.35    0.36
   9   2   9    5.38    0.47
   9   2  10    1.24    0.19
   9   3 -17    0.87    0.15
   9   3 -16    1.94    0.14
   9   3 -15    1.44    0.12
   9   3 -14    7.73    0.25
   9   3 -13    3.85    0.13
   9   3 -12    4.99    0.17
   9   3 -11   11.62    0.24
   9   3 -10    2.84    0.10
   9   3  -9    0.32    0.05
   9   3  -8   12.27    0.16
   9   3  -7   23.75    0.44
   9   3  -6   32.60    0.95
   9   3  -5   21.97    0.87
   9   3  -4   12.85    0.48
   9   3  -3    2.43    0.68
   9   3  -2    5.07    0.34
   9   3  -1    4.47    0.19
   9   3   0   39.09    0.62
   9   3   1    0.05    0.16
   9   3   2   25.13    0.60
   9   3   3   29.57    1.26
   9   3   4   13.37    0.39
   9   3   5    4.07    0.37
   9   3   6   21.91    0.81
   9   3   7    4.17    0.37
   9   3   8    4.05    0.30
   9   3   9    0.36    0.13
   9   3  10    4.12    0.24
   9   4 -17    0.61    0.07
   9   4 -16    1.01    0.09
   9   4 -15    5.94    0.24
   9   4 -14    2.11    0.17
   9   4 -13   19.88    0.52
   9   4 -12    7.68    0.29
   9   4 -11    9.72    0.43
   9   4 -10    4.43    0.15
   9   4  -9    3.26    0.24
   9   4  -8    6.01    0.11
   9   4  -7   15.72    0.25
   9   4  -6   14.74    0.09
   9   4  -5    7.86    0.16
   9   4  -4    0.94    0.07
   9   4  -3    7.51    0.71
   9   4  -2   13.95    0.13
   9   4  -1    2.56    0.16
   9   4   0   31.11    0.78
   9   4   1    2.06    0.08
   9   4   2    1.45    0.16
   9   4   3    6.76    0.12
   9   4   4   30.62    2.21
   9   4   5    2.88    0.28
   9   4   6    7.80    0.45
   9   4   7    7.51    0.36
   9   4   8    0.29    0.18
   9   4   9    1.45    0.22
   9   5 -17    1.15    0.06
   9   5 -16    0.44    0.07
   9   5 -15    4.43    0.47
   9   5 -14    7.26    0.26
   9   5 -13    2.72    0.08
   9   5 -12    7.65    0.15
   9   5 -11   10.73    0.14
   9   5 -10   12.62    0.21
   9   5  -9    1.64    0.07
   9   5  -8    8.97    0.13
   9   5  -7   37.55    0.37
   9   5  -6    2.27    0.25
   9   5  -5    0.20    0.07
   9   5  -4    4.48    0.09
   9   5  -3    5.33    0.45
   9   5  -2   23.32    0.87
   9   5  -1    4.95    0.30
   9   5   0    1.94    0.13
   9   5   1   34.10    1.05
   9   5   2    2.70    0.21
   9   5   3    0.91    0.23
   9   5   4    3.20    0.16
   9   5   5   13.46    0.73
   9   5   6    5.14    0.38
   9   5   7   15.12    0.78
   9   5   8    0.07    0.12
   9   6 -17    0.20    0.12
   9   6 -16    5.66    0.16
   9   6 -15    2.85    0.07
   9   6 -14   18.91    0.19
   9   6 -13    5.10    0.11
   9   6 -12    3.61    0.15
   9   6 -11    0.60    0.05
   9   6 -10   11.39    0.11
   9   6  -9   22.72    0.71
   9   6  -8    0.04    0.10
   9   6  -7    2.94    0.08
   9   6  -6    2.12    0.10
   9   6  -5    0.02    0.05
   9   6  -4    2.03    0.12
   9   6  -3    2.33    0.12
   9   6  -2    3.67    0.07
   9   6  -1   14.86    0.59
   9   6   0   10.38    0.55
   9   6   1   12.90    0.42
   9   6   2    5.77    0.17
   9   6   3    6.41    0.25
   9   6   4    6.56    0.23
   9   6   5    3.28    0.14
   9   6   6    0.61    0.19
   9   6   7    0.63    0.13
   9   7 -17    0.03    0.09
[truncated: 123,137 more chars]
